# Supplementary material for: 1,1′-Carbonyldiimidazole-mediated transformation of allomaltol containing hydrazides into substituted 3-acetyltetronic acids
Source: Royal Society of Chemistry journal article supplement (doi:10.1039/d3ob01136d), 2023-01-01
Supplement: d3ob01136d1.pdf [file d3ob01136d1.pdf]

Supporting Information

# **1,1'-Carbonyldiimidazole-mediated transformation of allomaltol containing hydrazides to substituted 3-acetyltetronic acids**

Andrey N. Komogortsev\*, Boris V. Lichitskii, Valeriya G. Melekhina

N. D. Zelinsky Institute of Organic Chemistry, Russian Academy of Science, Leninsky Pr., 47,  
Moscow 119991, Russian Federation

## Table of content

|                                                                                  |     |
|----------------------------------------------------------------------------------|-----|
| 1. General information .....                                                     | 3   |
| 2. Experimental procedure .....                                                  | 5   |
| 3. Characterization data for starting compounds 7 and 9.....                     | 7   |
| 4. Characterization data for 3-acetyltetronic acids 8 and intermediates 14 ..... | 12  |
| 5. Characterization data for compounds 16-19 .....                               | 16  |
| 6. Copies of <sup>1</sup> H and <sup>13</sup> C NMR spectra .....                | 18  |
| 6.1 Starting compounds 7 and 9 .....                                             | 18  |
| 6.2 3-Acetyltetronic acids 8 .....                                               | 39  |
| 6.3 Intermediates 14 .....                                                       | 54  |
| 6.4 Compounds 16-19 .....                                                        | 56  |
| 7. Copies of HRMS for all compounds.....                                         | 63  |
| 8. X-ray crystallographic data and refinement details .....                      | 107 |
| 8.1 Compound 7a .....                                                            | 107 |
| 8.2 Compound 8a .....                                                            | 115 |
| 8.3 Compound 16b.....                                                            | 123 |
| 8.4 Compound 17 .....                                                            | 133 |
| 8.5 Compound 18b.....                                                            | 141 |
| 8.6 Intermediate 14a .....                                                       | 151 |
| 8.7 Compound 19 .....                                                            | 160 |
| 9. References .....                                                              | 168 |

## 1. General information

Unless otherwise stated, all starting chemicals were commercially available and were used as received. Compounds **10** and **15** were prepared according to a procedure described previously.<sup>1</sup> NMR spectra were recorded with Bruker AM 300 (300 MHz), Bruker DRX 500 (500 MHz) and Bruker AV 600 (600 MHz) spectrometers in DMSO-*d*<sub>6</sub>. Chemical shifts (ppm) are given relative to solvent signals (DMSO-*d*<sub>6</sub>: 2.50 ppm (<sup>1</sup>H NMR) and 39.52 ppm (<sup>13</sup>C NMR)). High-resolution mass spectra (HRMS) were obtained on a Bruker micrOTOF II instrument using electrospray ionization (ESI). The melting points were determined on a Kofler hot stage. Magnetic stirrer IKA C-MAG HS 7 was used for the reactions that require heating.

### Compounds **10**:

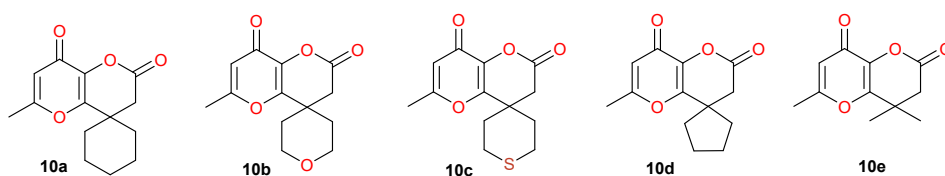

### Compounds **15**:

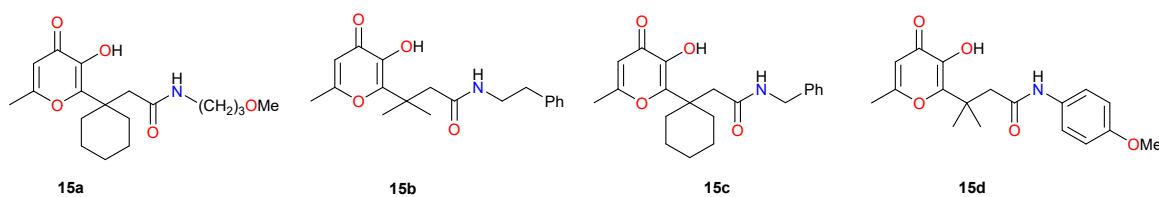

## Synthesized compounds 7:

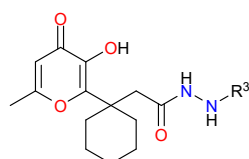

R<sup>3</sup> = Ph (**7a**), 73%

3,5-(CH<sub>3</sub>)<sub>2</sub>C<sub>6</sub>H<sub>3</sub> (**7b**), 71%

4-BrC<sub>6</sub>H<sub>4</sub> (**7c**), 76%

4-FC<sub>6</sub>H<sub>4</sub> (**7d**), 67%

2-CH<sub>3</sub>C<sub>6</sub>H<sub>4</sub> (**7e**), 65%

2,4-(F)<sub>2</sub>C<sub>6</sub>H<sub>3</sub> (**7f**), 62%

t-Bu (**7g**), 53%

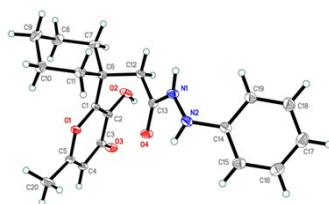

**7a** (CCDC 2270304)

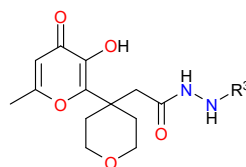

R<sup>3</sup> = Ph (**7h**), 78%

4-BrC<sub>6</sub>H<sub>4</sub> (**7i**), 82%

4-FC<sub>6</sub>H<sub>4</sub> (**7j**), 73%

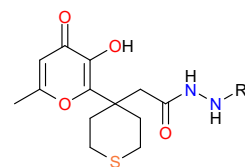

R<sup>3</sup> = Ph (**7k**), 79%

4-CH<sub>3</sub>CH<sub>2</sub>C<sub>6</sub>H<sub>4</sub> (**7l**), 76%

4-BrC<sub>6</sub>H<sub>4</sub> (**7m**), 84%

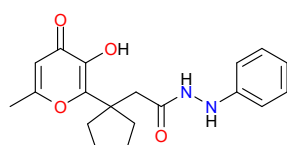

**7n**, 59%

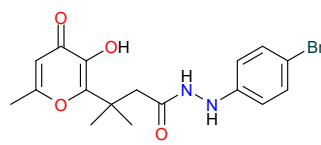

**7o**, 64%

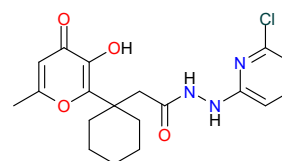

**7p**, 57%

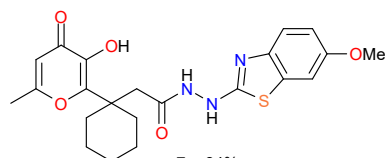

**7q**, 84%

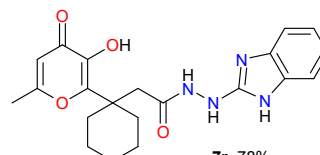

**7r**, 78%

## Synthesized compounds 9:

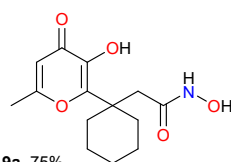

**9a**, 75%

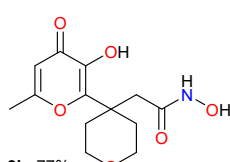

**9b**, 77%

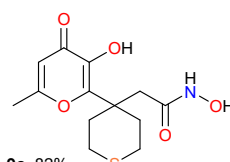

**9c**, 82%

## 2. Experimental procedure

### General experimental procedure for the synthesis of hydrazides **7**

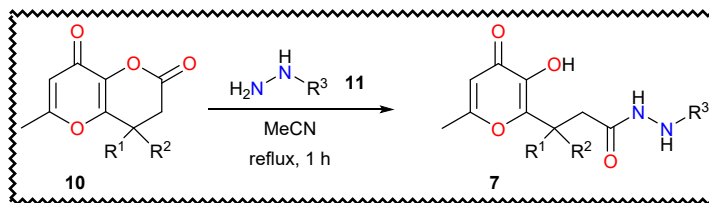

A mixture of lactone **10** (1 mmol) and the corresponding hydrazine **11** (1.1 mmol) (or hydrazine hydrochloride (1.1 mmol) and Et<sub>3</sub>N (1.1 mmol, 0.11 g)) was refluxed in acetonitrile (5 ml) for 1 h. The resulting mixture was evaporated in vacuum and obtained residue was recrystallized from EtOH. The precipitate formed was filtered and washed with EtOH (3 × 5 ml).

### General experimental procedure for the synthesis of compounds **9**.

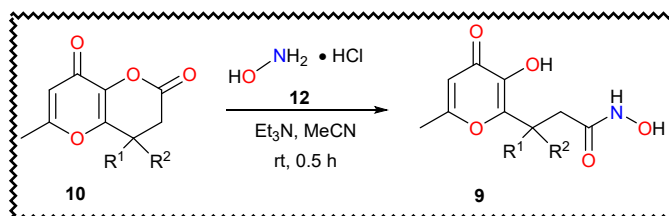

A mixture of lactone **10** (1 mmol), hydroxylamine hydrochloride **12** (0.08 g, 1.1 mmol) and Et<sub>3</sub>N (1.1 mmol, 0.11 g) was stirred at room temperature in acetonitrile (5 ml) for 0.5 h. The resulting precipitate was filtered and washed with MeCN (3 × 5 ml).

### General experimental procedure for the synthesis of 3-acetyltetronic acids **8**

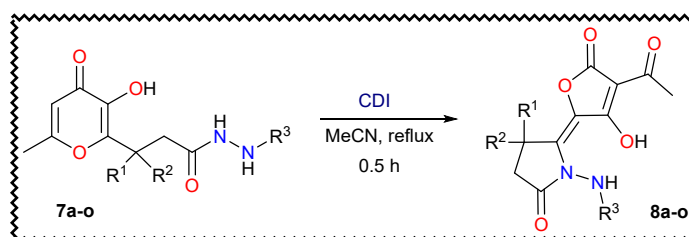

A mixture of corresponding hydrazide **7a-o** (1 mmol) and 1,1-carbonyldiimidazole (0.49 g, 3 mmol) was refluxed in acetonitrile (7 ml) for 0.5 h. The resulting solution was evaporated in vacuum and obtained residue was dissolved in EtOH (5 ml) and HCl<sub>conc.</sub> (0.7 g) was added. The precipitate formed was filtered and washed with EtOH (3 × 5 ml).

### Experimental procedure for the synthesis of compounds **16,17**

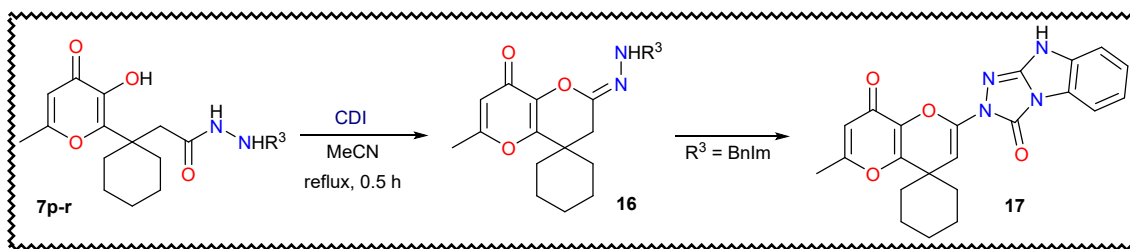

A mixture of corresponding hydrazide **7p-r** (1 mmol) and 1,1-carbonyldiimidazole (0.49 g, 3 mmol) was refluxed in acetonitrile (7 ml) for 0.5 h. The resulting solution was evaporated in vacuum and obtained residue was recrystallized from *i*-PrOH. The resulting precipitate was filtered and washed with *i*-PrOH (3 × 5 ml).

#### Experimental procedure for the synthesis of compounds **18**

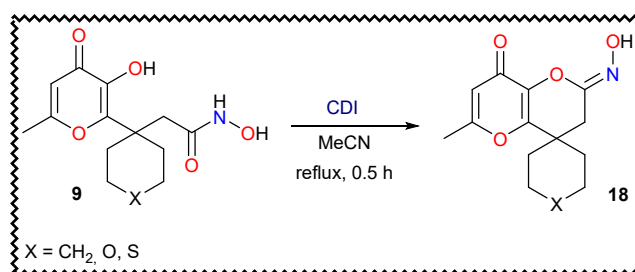

A mixture of corresponding hydroxamic acid (1 mmol) and 1,1-carbonyldiimidazole (0.49 g, 3 mmol) was refluxed in acetonitrile (7 ml) for 0.5 h. The resulting solution was evaporated in vacuum and  $\text{H}_2\text{O}$  (10 ml) was added. The obtained mixture was refluxed 1 h. The resulting precipitate was filtered and washed with  $\text{H}_2\text{O}$  (3 × 5 ml).

#### Experimental procedure for the synthesis of tetronic acid **19**

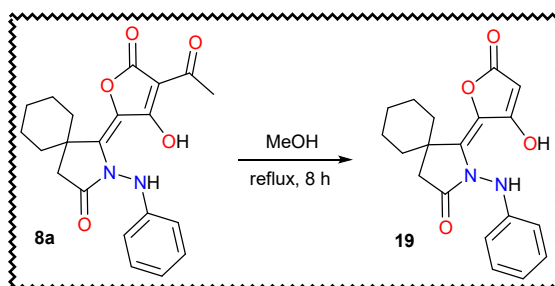

3-Acyltetronic acid **8a** (0.38 g, 1 mmol) in MeOH (5 ml) was refluxed for 8 h. After evaporation of the solvent in vacuum the target product **19** was obtained in pure form.

### 3. Characterization data for starting compounds 7 and 9

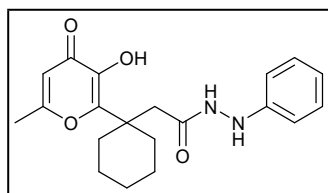

2-(1-(3-hydroxy-6-methyl-4-oxo-4H-pyran-2-yl)cyclohexyl)-N'-phenylacetohydrazide (**7a**)

white powder; yield 73% (0.26 g); mp 212-214 °C. <sup>1</sup>H NMR (300 MHz, DMSO-*d*<sub>6</sub>) δ 9.51 (d, *J* = 2.9 Hz, 1H), 8.42 (br. s, 1H), 7.57 (d, *J* = 2.9 Hz, 1H), 7.13 – 7.02 (m, 2H), 6.70 – 6.57 (m, 3H), 6.21 (s, 1H), 2.59 (s, 2H), 2.44 – 2.30 (m, 2H), 2.19 (s, 3H), 1.66 – 1.43 (m, 5H), 1.42 – 1.21 (m, 3H). <sup>13</sup>C NMR (75 MHz, DMSO-*d*<sub>6</sub>) δ 173.81, 169.36, 164.14, 152.73, 149.37, 141.87, 128.57, 118.30, 112.03, 110.06, 41.72, 41.38, 33.19, 25.42, 22.51, 19.22. HRMS (ESI-TOF) *m/z*: [M+H]<sup>+</sup> Calcd for C<sub>20</sub>H<sub>25</sub>N<sub>2</sub>O<sub>4</sub>: 357.1809; Found: 357.1793.

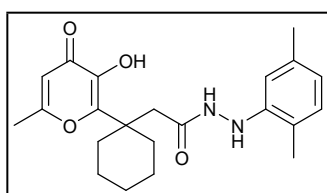

N'-(2,5-dimethylphenyl)-2-(1-(3-hydroxy-6-methyl-4-oxo-4H-pyran-2-yl)cyclohexyl)acetohydrazide (**7b**)

white powder; yield 71% (0.27 g); mp 204-206 °C. <sup>1</sup>H NMR (300 MHz, DMSO-*d*<sub>6</sub>) δ 9.49 (d, *J* = 3.1 Hz, 1H), 8.41 (br. s, 1H), 7.40 (d, *J* = 3.0 Hz, 1H), 6.31 (s, 1H), 6.26 (s, 2H), 6.19 (s, 1H), 2.59 (s, 2H), 2.40 – 2.29 (m, 2H), 2.18 (s, 3H), 2.13 (s, 6H), 1.66 – 1.43 (m, 5H), 1.40 – 1.26 (m, 3H). <sup>13</sup>C NMR (126 MHz, DMSO-*d*<sub>6</sub>) δ 173.8, 169.3, 164.1, 152.9, 149.4, 141.8, 137.5, 120.2, 110.1, 41.7, 33.0, 25.4, 22.5, 21.1, 19.2. HRMS (ESI-TOF) *m/z*: [M+H]<sup>+</sup> Calcd for C<sub>22</sub>H<sub>29</sub>N<sub>2</sub>O<sub>4</sub>: 385.2122; Found: 385.2110.

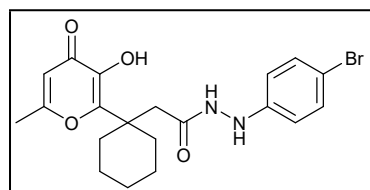

N'-(4-bromophenyl)-2-(1-(3-hydroxy-6-methyl-4-oxo-4H-pyran-2-yl)cyclohexyl)acetohydrazide (**7c**)

yellowish powder; yield 76% (0.33 g); mp 231-233 °C. <sup>1</sup>H NMR (300 MHz, DMSO-*d*<sub>6</sub>) δ 9.56 (d, *J* = 2.7 Hz, 1H), 8.44 (br. s, 1H), 7.80 (d, *J* = 2.6 Hz, 1H), 7.22 (d, *J* = 8.7 Hz, 2H), 6.55 (d, *J* = 8.8 Hz, 2H), 6.22 (s, 1H), 2.58 (s, 2H), 2.42 – 2.27 (m, 2H), 2.20 (s, 3H), 1.65 – 1.44 (m, 5H), 1.42 – 1.27 (m, 3H). <sup>13</sup>C NMR (75 MHz, DMSO-*d*<sub>6</sub>) δ 173.82, 169.43, 164.17, 152.65, 148.75, 141.90, 131.18, 113.99, 110.05, 109.03, 41.73, 41.40, 33.26, 25.40, 22.50, 19.23. HRMS (ESI-TOF) *m/z*: [M+H]<sup>+</sup> Calcd for C<sub>20</sub>H<sub>24</sub>BrN<sub>2</sub>O<sub>4</sub>: 435.0914; Found: 435.0911.

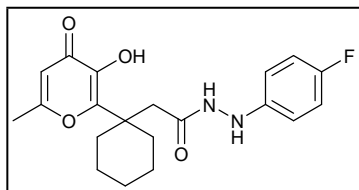

N'-(4-fluorophenyl)-2-(1-(3-hydroxy-6-methyl-4-oxo-4H-pyran-2-yl)cyclohexyl)acetohydrazide (**7d**)

white powder; yield 67% (0.25 g); mp 208-210 °C. <sup>1</sup>H NMR (300 MHz, DMSO-*d*<sub>6</sub>) δ 9.54 (d, *J* = 3.1 Hz, 1H), 8.44 (br.s, 1H), 7.57 (d, *J* = 3.1 Hz, 1H), 6.99 – 6.87 (m, 2H), 6.67 – 6.54 (m, 2H), 6.21 (s, 1H), 2.58 (s, 2H), 2.42 – 2.30 (m, 2H), 2.19 (s, 3H), 1.65 – 1.43 (m, 5H), 1.40 – 1.26 (m, 3H). <sup>13</sup>C NMR (126 MHz, DMSO-*d*<sub>6</sub>) δ 173.8, 169.4, 164.2, 155.7 (d, *J* = 233.2 Hz), 152.7, 145.9, 141.9, 115.0 (d, *J* = 22.2 Hz), 113.2 (d, *J* = 7.6 Hz), 110.1, 41.7, 41.4, 33.2, 25.4, 22.5, 19.2. HRMS (ESI-TOF) *m/z*: [M+H]<sup>+</sup> Calcd for C<sub>20</sub>H<sub>24</sub>FN<sub>2</sub>O<sub>4</sub>: 375.1715; Found: 375.1720.

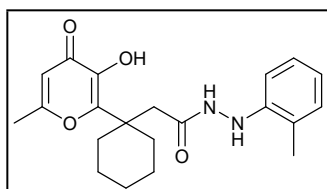

2-(1-(3-hydroxy-6-methyl-4-oxo-4H-pyran-2-yl)cyclohexyl)-N'-(*o*-tolyl)acetohydrazide (**7e**)

white powder; yield 65% (0.24 g); mp 181-183 °C. <sup>1</sup>H NMR (300 MHz, DMSO-*d*<sub>6</sub>) δ 9.56 (s, 1H), 8.46 (s, 1H), 7.01 – 6.89 (m, 3H), 6.66 – 6.58 (m, 1H), 6.49 (d, *J* = 8.0 Hz, 1H), 6.21 (s, 1H), 2.64 (s, 2H), 2.40 – 2.30 (m, 2H), 2.18 (s, 3H), 2.09 (s, 3H), 1.63 – 1.46 (m, 5H), 1.39 – 1.27 (m, 3H). <sup>13</sup>C NMR (126 MHz, DMSO-*d*<sub>6</sub>) δ 173.79, 169.32, 164.10, 152.88, 146.67, 141.82, 129.83, 126.29, 121.64, 118.44, 110.74, 110.09, 41.61, 41.18, 33.14, 25.42, 22.49, 19.24, 17.18. HRMS (ESI-TOF) *m/z*: [M+H]<sup>+</sup> Calcd for C<sub>21</sub>H<sub>27</sub>N<sub>2</sub>O<sub>4</sub>: 371.1965; Found: 371.1955.

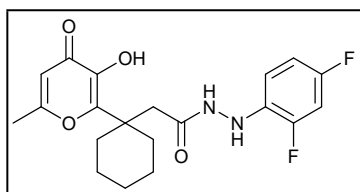

*N'*-(2,4-difluorophenyl)-2-(1-(3-hydroxy-6-methyl-4-oxo-4H-pyran-2-yl)cyclohexyl)acetohydrazide (**7f**)

white powder; yield 62% (0.24 g); mp 190-192 °C. <sup>1</sup>H NMR (300 MHz, DMSO-*d*<sub>6</sub>) δ 9.62 (d, *J* = 2.7 Hz, 1H), 8.46 (br.s, 1H), 7.43 (s, 1H), 7.16 – 7.02 (m, 1H), 6.89 – 6.77 (m, 1H), 6.67 – 6.53 (m, 1H), 6.21 (s, 1H), 2.59 (s, 2H), 2.41 – 2.25 (m, 2H), 2.19 (s, 3H), 1.68 – 1.43 (m, 5H), 1.41 – 1.23 (m, 3H). <sup>13</sup>C NMR (126 MHz, DMSO-*d*<sub>6</sub>) δ 173.81, 169.58, 164.16, 154.62 (dd, *J* = 236.1, 11.0 Hz), 152.68, 149.37 (dd, *J* = 242.7, 12.1 Hz), 141.88, 133.70 (dd, *J* = 11.4, 2.2 Hz), 113.89 (dd, *J* = 9.1, 4.8 Hz), 110.62 (dd, *J* = 21.6, 3.4 Hz), 110.07, 103.55 (dd, *J* = 27.0, 22.3 Hz), 41.69, 41.34, 33.22, 25.39, 22.49, 19.21. HRMS (ESI-TOF) *m/z*: [M+H]<sup>+</sup> Calcd for C<sub>20</sub>H<sub>23</sub>F<sub>2</sub>N<sub>2</sub>O<sub>4</sub>: 393.1620; Found: 393.1619.

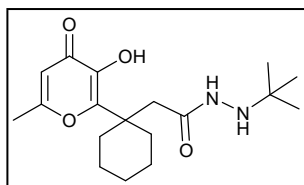

*N'*-(*tert*-butyl)-2-(1-(3-hydroxy-6-methyl-4-oxo-4H-pyran-2-yl)cyclohexyl)acetohydrazide (**7g**)

white powder; yield 53% (0.18 g); mp 190-192 °C. <sup>1</sup>H NMR (300 MHz, DMSO-*d*<sub>6</sub>) δ 9.04 (s, 1H), 8.36 (br.s, 1H), 6.20 (s, 1H), 4.53 (br.s, 1H), 2.48 (s, 2H), 2.41 – 2.29 (m, 2H), 2.20 (s, 3H), 1.63 – 1.40 (m, 5H), 1.37 – 1.21 (m, 3H), 0.92 (s, 9H). <sup>13</sup>C NMR (75 MHz, DMSO-*d*<sub>6</sub>) δ 173.8, 168.0, 164.0, 152.6, 141.9, 110.0, 53.9, 41.9, 41.8, 33.2, 27.1, 25.4, 22.5, 19.2. HRMS (ESI-TOF) *m/z*: [M+H]<sup>+</sup> Calcd for C<sub>18</sub>H<sub>29</sub>N<sub>2</sub>O<sub>4</sub>: 337.2122; Found: 337.2121.

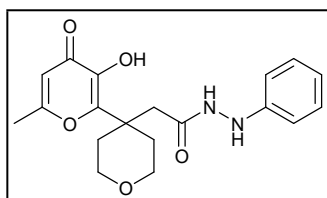

2-(4-(3-hydroxy-6-methyl-4-oxo-4H-pyran-2-yl)tetrahydro-2H-pyran-4-yl)-*N'*-phenylacetohydrazide (**7h**)

white powder; yield 78% (0.28 g); mp 171-173 °C. <sup>1</sup>H NMR (300 MHz, DMSO-*d*<sub>6</sub>) δ 9.57 (s, 1H), 8.66 (br. s, 1H), 7.61 (s, 1H), 7.12 – 7.02 (m, 2H), 6.70 – 6.64 (m, 1H), 6.59 (d, *J* = 7.9 Hz, 2H), 6.24 (s, 1H), 3.82 – 3.73 (m, 2H), 3.42 (d, *J* = 10.7 Hz, 2H), 2.65 (s, 2H), 2.39 (d, *J* = 13.7 Hz, 2H), 2.19 (s, 3H), 1.81 – 1.66 (m, 2H). <sup>13</sup>C NMR (151 MHz, DMSO-*d*<sub>6</sub>) δ 173.83, 169.00, 164.34, 151.24, 149.24, 142.14, 128.56, 118.30, 111.99, 110.23, 64.01, 41.37, 39.56, 33.48, 19.19. HRMS (ESI-TOF) *m/z*: [M+H]<sup>+</sup> Calcd for C<sub>19</sub>H<sub>23</sub>N<sub>2</sub>O<sub>5</sub>: 359.1601; Found: 359.1587.

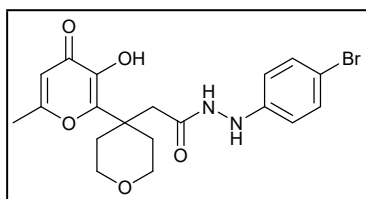

*N'*-(4-bromophenyl)-2-(4-(3-hydroxy-6-methyl-4-oxo-4H-pyran-2-yl)tetrahydro-2H-pyran-4-yl)acetohydrazide (**7i**)

white powder; yield 82% (0.36 g); mp 204-206 °C. <sup>1</sup>H NMR (300 MHz, DMSO-*d*<sub>6</sub>) δ 9.61 (s, 1H), 8.68 (s, 1H), 7.82 (s, 1H), 7.22 (d, *J* = 8.4 Hz, 2H), 6.53 (d, *J* = 8.4 Hz, 2H), 6.25 (s, 1H), 3.75 (d, *J* = 12.0 Hz, 2H), 3.41 (d, *J* = 10.8 Hz, 2H), 2.64 (s, 2H), 2.38 (d, *J* = 13.8 Hz, 2H), 2.20 (s, 3H), 1.77 – 1.64 (m, 2H). <sup>13</sup>C NMR (151 MHz, DMSO-*d*<sub>6</sub>) δ 173.86, 169.08, 164.40, 151.17, 148.64, 142.18, 131.18, 113.96, 110.23,



109.05, 64.02, 41.43, 39.60, 33.57, 19.20. HRMS (ESI-TOF)  $m/z$ :  $[M+H]^+$  Calcd for  $C_{19}H_{22}BrN_2O_5$ : 439.0687; Found: 439.0677.

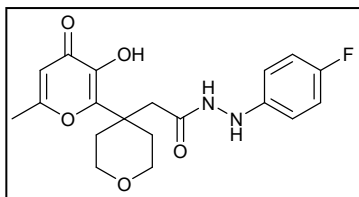

*N'*-(4-fluorophenyl)-2-(4-(3-hydroxy-6-methyl-4-oxo-4H-pyran-2-yl)tetrahydro-2H-pyran-4-yl)acetohydrazide (**7j**)

white powder; yield 73% (0.27 g); mp 192-194 °C.  $^1H$  NMR (300 MHz, DMSO- $d_6$ )  $\delta$  9.59 (s, 1H), 8.67 (s, 1H), 7.59 (s, 1H), 6.98 – 6.87 (m, 2H), 6.65 – 6.53 (m, 2H), 6.24 (s, 1H), 3.83 – 3.70 (m, 2H), 3.41 (d,  $J$  = 11.0 Hz, 2H), 2.64 (s, 2H), 2.38 (d,  $J$  = 13.8 Hz, 2H), 2.19 (s, 3H), 1.76 – 1.63 (m, 2H).  $^{13}C$  NMR (151 MHz, DMSO- $d_6$ )  $\delta$  173.86, 169.06, 164.37, 155.70 (d,  $J$  = 232.8 Hz), 151.21, 145.81, 142.17, 114.98 (d,  $J$  = 22.2 Hz), 113.18 (d,  $J$  = 7.8 Hz), 110.23, 64.02, 41.43, 39.60, 33.53, 19.19. HRMS (ESI-TOF)  $m/z$ :  $[M+H]^+$  Calcd for  $C_{19}H_{22}FN_2O_5$ : 377.1507; Found: 377.1505.

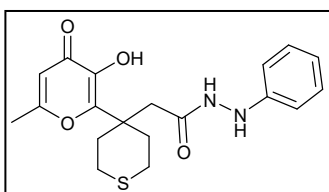

2-(4-(3-hydroxy-6-methyl-4-oxo-4H-pyran-2-yl)tetrahydro-2H-thiopyran-4-yl)-*N'*-phenylacetohydrazide (**7k**)

white powder; yield 79% (0.3 g); mp 211-213 °C.  $^1H$  NMR (300 MHz, DMSO- $d_6$ )  $\delta$  9.57 (d,  $J$  = 3.0 Hz, 1H), 8.63 (br.s, 1H), 7.60 (d,  $J$  = 2.9 Hz, 1H), 7.14 – 7.04 (m, 2H), 6.67 (d,  $J$  = 7.3 Hz, 1H), 6.61 (d,  $J$  = 8.0 Hz, 2H), 6.23 (s, 1H), 2.69 – 2.61 (m, 8H), 2.20 (s, 3H), 1.94 – 1.80 (m, 2H).  $^{13}C$  NMR (75 MHz, DMSO- $d_6$ )  $\delta$  173.8, 168.9, 164.5, 151.1, 149.3, 142.1, 128.6, 118.3, 112.0, 110.2, 41.5, 41.1, 34.2, 24.0, 19.2. HRMS (ESI-TOF)  $m/z$ :  $[M+H]^+$  Calcd for  $C_{19}H_{23}N_2O_4S$ : 375.1373; Found: 375.1381.

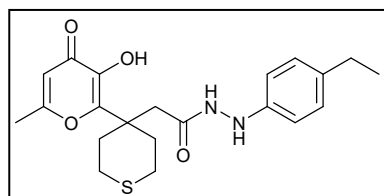

*N'*-(4-ethylphenyl)-2-(4-(3-hydroxy-6-methyl-4-oxo-4H-pyran-2-yl)tetrahydro-2H-thiopyran-4-yl)acetohydrazide (**7l**)

yellowish powder; yield 76% (0.31 g); mp 225-227 °C.  $^1H$  NMR (300 MHz, DMSO- $d_6$ )  $\delta$  9.55 (d,  $J$  = 3.3 Hz, 1H), 8.62 (br.s, 1H), 7.44 (d,  $J$  = 3.2 Hz, 1H), 6.93 (d,  $J$  = 7.9 Hz, 2H), 6.54 (d,  $J$  = 8.0 Hz, 2H), 6.23 (s, 1H), 2.75 – 2.54 (m, 8H), 2.47 – 2.40 (m, 2H), 2.20 (s, 3H), 1.94 – 1.75 (m, 2H), 1.11 (t,  $J$  = 7.5 Hz, 3H).  $^{13}C$  NMR (126 MHz, DMSO- $d_6$ )  $\delta$  173.9, 168.9, 164.5, 151.2, 147.2, 142.1, 133.7, 127.8, 112.3, 110.2, 41.5, 41.1, 34.2, 27.4, 24.0, 19.2, 16.0. HRMS (ESI-TOF)  $m/z$ :  $[M+H]^+$  Calcd for  $C_{21}H_{27}N_2O_4S$ : 403.1686; Found: 403.1684.

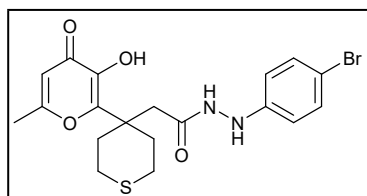

*N'*-(4-bromophenyl)-2-(4-(3-hydroxy-6-methyl-4-oxo-4H-pyran-2-yl)tetrahydro-2H-thiopyran-4-yl)acetohydrazide (**7m**)

white powder; yield 84% (0.38 g); mp 222-224 °C.  $^1H$  NMR (300 MHz, DMSO- $d_6$ )  $\delta$  9.62 (d,  $J$  = 2.7 Hz, 1H), 8.65 (br.s, 1H), 7.82 (d,  $J$  = 2.7 Hz, 1H), 7.23 (d,  $J$  = 8.3 Hz, 2H), 6.55 (d,  $J$  = 8.5 Hz, 2H), 6.24 (s, 1H), 2.74 – 2.56 (m, 8H), 2.21 (s, 3H), 1.92 – 1.81 (m, 2H).  $^{13}C$  NMR (75 MHz, DMSO- $d_6$ )  $\delta$  173.8, 169.0, 164.5, 151.1, 148.6, 142.1, 131.2, 114.0, 110.2, 109.1, 41.5, 41.1, 34.3, 24.0, 19.2. HRMS (ESI-TOF)  $m/z$ :  $[M+H]^+$  Calcd for  $C_{19}H_{22}BrN_2O_4S$ : 453.0478; Found: 453.0467.

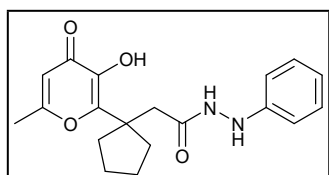

2-(1-(3-hydroxy-6-methyl-4-oxo-4H-pyran-2-yl)cyclopentyl)-*N'*-phenylacetohydrazide (**7n**)

white powder; yield 59% (0.2 g); mp 212-214 °C. <sup>1</sup>H NMR (300 MHz, DMSO-*d*<sub>6</sub>) δ 9.51 (d, *J* = 2.8 Hz, 1H), 8.43 (br.s, 1H), 7.58 (d, *J* = 2.8 Hz, 1H), 7.14 – 7.03 (m, 2H), 6.71 – 6.56 (m, 3H), 6.18 (s, 1H), 2.67 (s, 2H), 2.27 – 2.12 (m, 5H), 1.88 – 1.52 (m, 6H). <sup>13</sup>C NMR (75 MHz, DMSO-*d*<sub>6</sub>) δ 173.7, 169.9, 163.7, 153.9, 149.4, 141.1, 128.5, 118.3, 112.0, 110.3, 48.5, 39.9, 35.5, 23.2, 19.2. HRMS (ESI-TOF) *m/z*: [M+H]<sup>+</sup> Calcd for C<sub>19</sub>H<sub>23</sub>N<sub>2</sub>O<sub>4</sub>: 343.1652; Found: 343.1650.

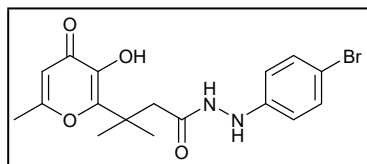

*N'*-(4-bromophenyl)-3-(3-hydroxy-6-methyl-4-oxo-4H-pyran-2-yl)-3-methylbutanehydrazide (**7o**)

white powder; yield 64% (0.25 g); mp 190-192 °C. <sup>1</sup>H NMR (300 MHz, DMSO-*d*<sub>6</sub>) δ 9.60 (s, 1H), 8.48 (br. s, 1H), 7.85 (s, 1H), 7.23 (d, *J* = 8.3 Hz, 2H), 6.57 (d, *J* = 8.4 Hz, 2H), 6.20 (s, 1H), 2.65 (s, 2H), 2.21 (s, 3H), 1.38 (s, 6H). <sup>13</sup>C NMR (126 MHz, DMSO-*d*<sub>6</sub>) δ 173.8, 169.9, 163.8, 154.0, 148.8, 141.1, 131.2, 114.0, 110.2, 109.0, 42.3, 37.6, 25.6, 19.2. HRMS (ESI-TOF) *m/z*: [M+H]<sup>+</sup> Calcd for C<sub>17</sub>H<sub>20</sub>BrN<sub>2</sub>O<sub>4</sub>: 395.0601; Found: 395.0605.

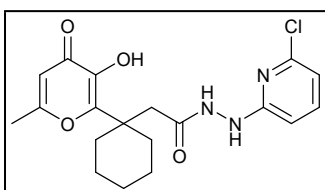

*N'*-(6-chloropyridin-2-yl)-2-(1-(3-hydroxy-6-methyl-4-oxo-4H-pyran-2-yl)cyclohexyl)acetohydrazide (**7p**)

White powder; yield 57% (0.22 g); mp 180-182 °C. <sup>1</sup>H NMR (300 MHz, DMSO-*d*<sub>6</sub>) δ 9.71 (s, 1H), 8.59 (s, 1H), 8.45 (s, 1H), 7.56 – 7.44 (m, 1H), 6.69 (d, *J* = 7.5 Hz, 1H), 6.37 (d, *J* = 8.2 Hz, 1H), 6.20 (s, 1H), 2.58 (s, 2H), 2.44 – 2.32 (m, 2H), 2.19 (s, 3H), 1.65 – 1.45 (m, 5H), 1.37 – 1.21 (m, 3H). <sup>13</sup>C NMR (126 MHz, DMSO-*d*<sub>6</sub>) δ 173.8, 169.4, 164.2, 160.1, 152.7, 148.2, 141.9, 140.4, 113.0, 110.1, 104.5, 41.8, 41.4, 33.1, 25.4, 22.6, 19.2. HRMS (ESI-TOF) *m/z*: [M+H]<sup>+</sup> Calcd for C<sub>19</sub>H<sub>23</sub>ClN<sub>3</sub>O<sub>4</sub>: 392.1372; Found: 392.1365.

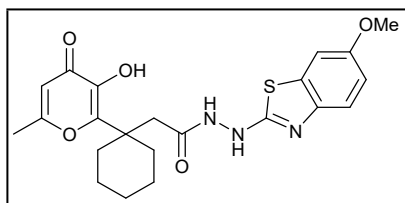

2-(1-(4-hydroxy-6-methyl-4H-pyran-2-yl)cyclohexyl)-*N'*-(6-methoxybenzo[*d*]thiazol-2-yl)acetohydrazide (**7q**)

grey powder; yield 84% (0.37 g); mp 216-218 °C. <sup>1</sup>H NMR (300 MHz, DMSO-*d*<sub>6</sub>) δ 10.16 (s, 1H), 9.52 (br. s, 1H), 8.50 (br. s, 1H), 7.40 – 7.30 (m, 2H), 6.87 (dd, *J* = 8.8, 2.7 Hz, 1H), 6.21 (s, 1H), 3.75 (s, 3H), 2.61 (s, 2H), 2.43 – 2.31 (m, 2H), 2.20 (s, 3H), 1.68 – 1.42 (m, 5H), 1.41 – 1.26 (m, 3H). <sup>13</sup>C NMR (75 MHz, DMSO-*d*<sub>6</sub>) δ 173.9, 169.9, 169.0, 164.2, 154.8, 152.6, 146.5, 141.9, 131.4, 119.3, 113.5, 110.2, 105.5, 55.6, 41.7, 41.0, 33.0, 25.4, 22.5, 19.3. HRMS (ESI-TOF) *m/z*: [M+H]<sup>+</sup> Calcd for C<sub>22</sub>H<sub>26</sub>N<sub>3</sub>O<sub>5</sub>S: 444.1588; Found: 444.1581.

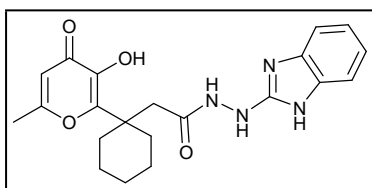

*N'*-(1H-benzo[*d*]imidazol-2-yl)-2-(1-(3-hydroxy-6-methyl-4-oxo-4H-pyran-2-yl)cyclohexyl)acetohydrazide (**7r**)

white powder; yield 78% (0.31 g); mp 165-167 °C. <sup>1</sup>H NMR (300 MHz, DMSO-*d*<sub>6</sub>) δ 11.05 (br.s, 1H), 9.80 (s, 1H), 8.85 – 8.29 (m, 2H), 7.24 – 7.13 (m, 2H), 6.97 – 6.84 (m, 2H), 6.19 (s, 1H), 2.62 (s, 2H), 2.38 (d, *J* = 12.4 Hz, 2H), 2.21 (s, 3H), 1.65 – 1.45 (m, 5H), 1.41 – 1.20 (m, 3H). <sup>13</sup>C NMR (126 MHz, DMSO-*d*<sub>6</sub>) δ 173.85, 169.95, 164.10, 155.93, 152.98, 141.81, 110.13, 41.63, 32.98, 25.42, 22.54, 19.21. HRMS (ESI-TOF) *m/z*: [M+H]<sup>+</sup> Calcd for C<sub>21</sub>H<sub>25</sub>N<sub>4</sub>O<sub>4</sub>: 397.1870; Found: 397.1867.

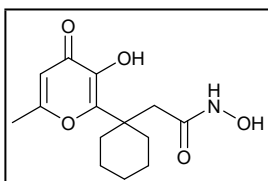

*N*-hydroxy-2-(1-(3-hydroxy-6-methyl-4-oxo-4H-pyran-2-yl)cyclohexyl)acetamide (**9a**)

White powder; yield 75% (0.21 g); mp 187-189 °C. <sup>1</sup>H NMR (300 MHz, DMSO-*d*<sub>6</sub>) δ 10.29 (s, 1H), 8.63 (br.s, 1H), 8.40 (br.s, 1H), 6.21 (s, 1H), 2.39 – 2.26 (m, 4H), 2.22 (s, 3H), 1.58 – 1.19 (m, 8H). <sup>13</sup>C NMR (75 MHz, DMSO-*d*<sub>6</sub>) δ 173.8, 166.4, 164.1, 152.7, 141.8, 110.0, 41.7, 40.6, 33.0, 25.4, 22.5, 19.2. HRMS (ESI-TOF) *m/z*: [M+H]<sup>+</sup> Calcd for C<sub>14</sub>H<sub>20</sub>NO<sub>5</sub>: 282.1336; Found: 282.1334.

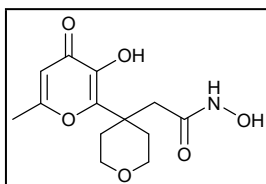

*N*-hydroxy-2-(4-(3-hydroxy-6-methyl-4-oxo-4H-pyran-2-yl)tetrahydro-2H-pyran-4-yl)acetamide (**9b**)

White powder; yield 77% (0.22 g); mp 202-204 °C. <sup>1</sup>H NMR (300 MHz, DMSO-*d*<sub>6</sub>) δ 10.33 (s, 1H), 8.77 – 8.46 (m, 2H), 6.23 (s, 1H), 3.81 – 3.65 (m, 2H), 3.44 – 3.34 (m, 2H), 2.40 (s, 2H), 2.38 – 2.27 (m, 2H), 2.23 (s, 3H), 1.75 – 1.58 (m, 2H). <sup>13</sup>C NMR (75 MHz, DMSO-*d*<sub>6</sub>) δ 173.9, 166.0, 164.4, 151.3, 142.1, 110.2, 64.1, 40.4, 33.2, 19.2. HRMS (ESI-TOF) *m/z*: [M+H]<sup>+</sup> Calcd for C<sub>13</sub>H<sub>18</sub>NO<sub>6</sub>: 284.1129; Found: 284.1132.

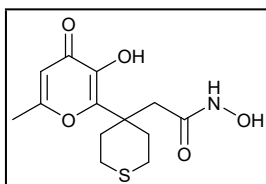

*N*-hydroxy-2-(4-(3-hydroxy-6-methyl-4-oxo-4H-pyran-2-yl)tetrahydro-2H-thiopyran-4-yl)acetamide (**9c**)

White powder; yield 82% (0.25 g); mp 179-181 °C. <sup>1</sup>H NMR (300 MHz, DMSO-*d*<sub>6</sub>) δ 10.35 (s, 1H), 8.80 – 8.44 (m, 2H), 6.23 (s, 1H), 2.71 – 2.53 (m, 6H), 2.34 (s, 2H), 2.24 (s, 3H), 1.86 – 1.71 (m, 2H). <sup>13</sup>C NMR (75 MHz, DMSO-*d*<sub>6</sub>) δ 173.9, 165.8, 164.5, 151.1, 142.2, 110.2, 41.2, 40.9, 34.1, 24.1, 19.3. HRMS (ESI-TOF) *m/z*: [M+H]<sup>+</sup> Calcd for C<sub>13</sub>H<sub>18</sub>NO<sub>5</sub>S: 300.0900; Found: 300.0907.

#### 4. Characterization data for 3-acetyltetronic acids **8** and intermediates **14**

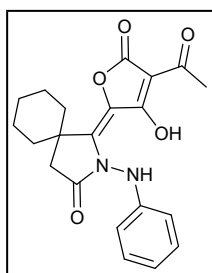

*(E)*-1-(4-acetyl-3-hydroxy-5-oxofuran-2(5H)-ylidene)-2-(phenylamino)-2-azaspiro[4.5]decan-3-one (**8a**)

Yellowish powder; yield 64% (0.24 g); mp 204-206 °C. <sup>1</sup>H NMR (300 MHz, DMSO-*d*<sub>6</sub>) δ 7.32 – 7.18 (m, 2H), 6.99 – 6.87 (m, 1H), 6.75 (d, *J* = 7.9 Hz, 2H), 4.68 – 4.41 (m, 2H in H<sub>2</sub>O), 2.74 (s, 2H), 2.25 (s, 3H), 2.22 – 2.07 (m, 2H), 1.74 – 1.58 (m, 5H), 1.50 – 1.31 (m, 2H), 1.31 – 1.14 (m, 1H). <sup>13</sup>C NMR (75 MHz, DMSO-*d*<sub>6</sub>) δ 190.7, 175.6, 171.6, 166.3, 144.8, 142.6, 129.3, 125.7, 122.4, 114.5, 98.2, 41.7, 38.2, 32.6, 28.2, 24.7, 21.6. HRMS (ESI-TOF) *m/z*: [M+H]<sup>+</sup> Calcd for C<sub>21</sub>H<sub>23</sub>N<sub>2</sub>O<sub>5</sub>: 383.1601; Found: 383.1605.

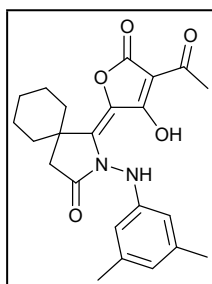

*(E)*-1-(4-acetyl-3-hydroxy-5-oxofuran-2(5H)-ylidene)-2-((3,5-dimethylphenyl)amino)-2-azaspiro[4.5]decan-3-one (**8b**)

White powder; yield 53% (0.22 g); mp 206-208 °C. <sup>1</sup>H NMR (300 MHz, DMSO-*d*<sub>6</sub>) δ 6.59 (s, 1H), 6.36 (s, 2H), 4.28 - 4.06 (m, 2H in H<sub>2</sub>O), 2.74 (s, 2H), 2.24 (s, 3H), 2.18 (s, 7H), 1.73 – 1.58 (m, 5H), 1.53 – 1.30 (m, 3H), 1.31 – 1.13 (m, 1H). <sup>13</sup>C NMR (75 MHz, DMSO-*d*<sub>6</sub>) δ 190.6, 174.7, 171.5, 166.3, 144.5, 143.0, 138.6, 125.3, 124.5, 112.4, 98.4, 41.7, 40.4, 38.2, 32.7, 28.6, 24.7, 21.6, 21.1. HRMS (ESI-TOF) *m/z*: [M+H]<sup>+</sup> Calcd for C<sub>23</sub>H<sub>27</sub>N<sub>2</sub>O<sub>5</sub>: 411.1912; Found: 411.1914.

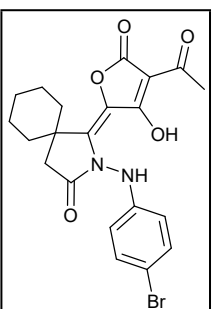

*(E)*-1-(4-acetyl-3-hydroxy-5-oxofuran-2(5H)-ylidene)-2-((4-bromophenyl)amino)-2-azaspiro[4.5]decan-3-one (**8c**)

Yellowish powder; yield 65% (0.3 g); mp 195-197 °C. <sup>1</sup>H NMR (300 MHz, DMSO-*d*<sub>6</sub>) δ 7.96 – 7.67 (m, 2H), 7.37 (d, *J* = 8.5 Hz, 2H), 6.65 (d, *J* = 8.3 Hz, 2H), 2.72 (s, 2H), 2.26 (s, 3H), 2.18 – 2.03 (m, 2H), 1.76 – 1.56 (m, 5H), 1.49 – 1.13 (m, 3H). <sup>13</sup>C NMR (75 MHz, DMSO-*d*<sub>6</sub>) δ 190.8, 177.5, 171.5, 166.7, 145.2, 140.8, 131.8, 128.3, 116.0, 112.7, 97.7, 41.4, 38.2, 32.4, 27.8, 24.7, 21.6. HRMS (ESI-TOF) *m/z*: [M+H]<sup>+</sup> Calcd for C<sub>21</sub>H<sub>22</sub>BrN<sub>2</sub>O<sub>5</sub>: 461.0707; Found: 461.0689.

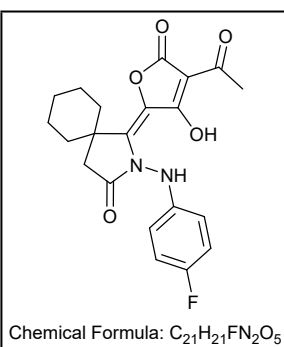

*(E)*-1-(4-acetyl-3-hydroxy-5-oxofuran-2(5H)-ylidene)-2-((4-fluorophenyl)amino)-2-azaspiro[4.5]decan-3-one (**8d**)

White powder; yield 68% (0.27 g); mp 196-198 °C. <sup>1</sup>H NMR (300 MHz, DMSO-*d*<sub>6</sub>) δ 7.14 – 7.05 (m, 2H), 6.92 – 6.73 (m, 4H), 2.73 (s, 2H), 2.26 (s, 3H), 2.19 – 2.07 (m, 2H), 1.71 – 1.55 (m, 5H), 1.45 – 1.17 (m, 3H). <sup>13</sup>C NMR (75 MHz, DMSO-*d*<sub>6</sub>) δ 190.5, 176.3, 171.6, 166.6, 157.7 (d, *J* = 237.7 Hz), 141.6 (d, *J* = 2.1 Hz), 141.4, 126.2, 116.0, 115.9 (d, *J* = 29.9 Hz), 98.0, 41.5, 38.2, 32.5, 28.3, 24.7, 21.6. HRMS (ESI-TOF) *m/z*: [M+H]<sup>+</sup> Calcd for C<sub>21</sub>H<sub>22</sub>FN<sub>2</sub>O<sub>5</sub>: 401.1507; Found: 401.1513.

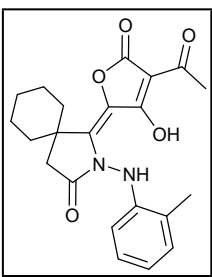

*(E)*-1-(4-acetyl-3-hydroxy-5-oxofuran-2(5H)-ylidene)-2-(*o*-tolylamino)-2-azaspiro[4.5]decan-3-one (**8e**)

Yellowish powder; yield 47% (0.19 g); mp 135-137 °C. <sup>1</sup>H NMR (300 MHz, DMSO-*d*<sub>6</sub>) δ 7.17 – 7.01 (m, 2H), 6.87 – 6.75 (m, 1H), 6.40 (d, *J* = 8.0 Hz, 1H), 4.70 – 4.41 (m, 2H in H<sub>2</sub>O), 2.75 (s, 2H), 2.28 (s, 3H), 2.24 (s, 3H), 2.21 – 2.13 (m, 2H), 1.72 – 1.60 (m, 4H), 1.52 – 1.13 (m, 4H). <sup>13</sup>C NMR (75 MHz, DMSO-*d*<sub>6</sub>) δ 190.6, 177.0, 171.3, 166.6, 142.5, 141.9, 130.8, 126.7, 126.3, 124.4, 121.2, 111.6, 97.8, 41.4, 38.3, 32.8, 28.0, 24.7, 21.7, 17.0. HRMS (ESI-TOF) *m/z*: [M+H]<sup>+</sup> Calcd for C<sub>22</sub>H<sub>25</sub>N<sub>2</sub>O<sub>5</sub>: 397.1758; Found: 397.1762.

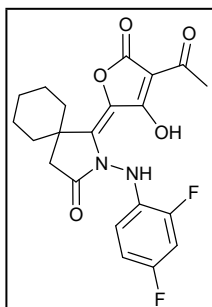

*(E)*-1-(4-acetyl-3-hydroxy-5-oxofuran-2(5H)-ylidene)-2-((2,4-difluorophenyl)amino)-2-azaspiro[4.5]decan-3-one (**8f**)

White powder; yield 74% (0.31 g); mp 201-203 °C. <sup>1</sup>H NMR (300 MHz, DMSO-*d*<sub>6</sub>) δ 7.27 – 7.18 (m, 1H), 7.07 – 6.86 (m, 3H), 6.70 – 6.55 (m, 1H), 2.72 (s, 2H), 2.25 (s, 3H), 2.22 – 2.06 (m, 2H), 1.74 – 1.57 (m, 5H), 1.48 – 1.31 (m, 2H), 1.29 – 1.15 (m, 1H). <sup>13</sup>C NMR (126 MHz, DMSO-*d*<sub>6</sub>) δ 190.8, 178.2, 171.4, 166.7, 156.1 (dd, *J* = 239.0, 11.1 Hz), 150.99 (dd, *J* = 245.6, 12.2 Hz), 140.45, 130.12 (d, *J* = 10.4 Hz), 127.0, 115.1 (dd, *J* = 9.2, 3.4 Hz), 111.0 (dd, *J* = 22.3, 3.1 Hz), 104.4 (dd, *J* = 27.0, 22.5 Hz), 97.4, 41.3, 38.2, 32.5, 27.5, 24.7, 21.6. HRMS (ESI-TOF) *m/z*: [M+H]<sup>+</sup> Calcd for C<sub>21</sub>H<sub>21</sub>F<sub>2</sub>N<sub>2</sub>O<sub>5</sub>: 419.1410; Found: 419.1413.

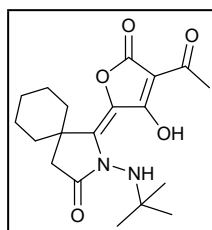

*(E)*-1-(4-acetyl-3-hydroxy-5-oxofuran-2(5H)-ylidene)-2-(tert-butylamino)-2-azaspiro[4.5]decan-3-one (**8g**)

White powder; yield 41% (0.15 g); mp 238-240 °C. <sup>1</sup>H NMR (300 MHz, DMSO-*d*<sub>6</sub>) δ 3.57 – 3.21 (m, 2H in H<sub>2</sub>O), 2.92 – 2.62 (m, 2H), 2.27 (s, 3H), 2.17 – 1.95 (m, 2H), 1.76 – 1.56 (m, 5H), 1.50 – 1.28 (m, 3H), 1.17 (s, 9H). <sup>13</sup>C NMR (126 MHz, DMSO-*d*<sub>6</sub>) δ 190.3, 174.1, 171.5, 166.2, 142.9, 125.0, 98.7, 61.4, 41.8, 37.8, 29.8, 28.7, 25.8, 24.6, 21.5. HRMS (ESI-TOF) *m/z*: [M+H]<sup>+</sup> Calcd for C<sub>19</sub>H<sub>27</sub>N<sub>2</sub>O<sub>5</sub>: 363.1914; Found: 363.1908.

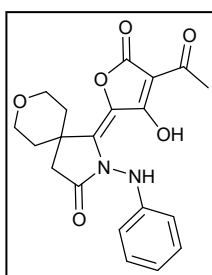

*(E)*-1-(4-acetyl-3-hydroxy-5-oxofuran-2(5H)-ylidene)-2-(phenylamino)-8-oxa-2-azaspiro[4.5]decan-3-one (**8h**)

White powder; yield 66% (0.25 g); mp 209-211 °C. <sup>1</sup>H NMR (300 MHz, DMSO-*d*<sub>6</sub>) δ 7.31 – 7.19 (m, 2H), 6.99 – 6.87 (m, 1H), 6.73 (d, *J* = 7.9 Hz, 2H), 6.42 – 6.11 (m, 2H in H<sub>2</sub>O), 3.93 – 3.77 (m, 2H), 3.57 – 3.39 (m, 2H), 2.90 (s, 2H), 2.46 – 2.37 (m, 2H), 2.25 (s, 3H), 1.55 (d, *J* = 12.9 Hz, 2H). <sup>13</sup>C NMR (75 MHz, DMSO-*d*<sub>6</sub>) δ 190.4, 176.7, 171.2, 166.8, 145.3, 139.5, 129.2, 126.6, 121.8, 114.2, 97.7, 63.3, 39.0, 37.8, 32.6, 28.3. HRMS (ESI-TOF) *m/z*: [M+H]<sup>+</sup> Calcd for C<sub>20</sub>H<sub>21</sub>N<sub>2</sub>O<sub>6</sub>: 385.1394; Found: 385.1380.

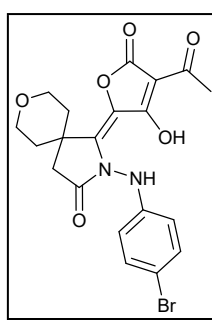

*(E)*-1-(4-acetyl-3-hydroxy-5-oxofuran-2(5H)-ylidene)-2-((4-bromophenyl)amino)-8-oxa-2-azaspiro[4.5]decan-3-one (**8i**)

White powder; yield 71% (0.34 g); mp 207-209 °C. <sup>1</sup>H NMR (300 MHz, DMSO-*d*<sub>6</sub>) δ 7.34 (d, *J* = 8.2 Hz, 2H), 6.62 (d, *J* = 8.3 Hz, 2H), 4.54 – 4.07 (m, 2H in H<sub>2</sub>O), 3.91 – 3.77 (m, 2H), 3.55 – 3.38 (m, 2H), 2.86 (s, 2H), 2.44 – 2.31 (m, 2H), 2.23 (s, 3H), 1.53 (d, *J* = 12.9 Hz, 2H). <sup>13</sup>C NMR (126 MHz, DMSO-*d*<sub>6</sub>) δ 190.6, 178.4, 171.2, 167.3, 145.5, 137.8, 131.7, 127.6, 115.8, 112.4, 97.3, 63.3, 38.8, 37.9, 32.6, 28.2. HRMS (ESI-TOF) *m/z*: [M+Na]<sup>+</sup> Calcd for C<sub>20</sub>H<sub>19</sub>BrN<sub>2</sub>O<sub>6</sub>Na: 485.0319; Found: 485.0339.

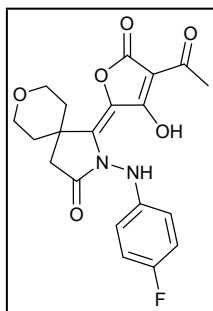

*(E)*-1-(4-acetyl-3-hydroxy-5-oxofuran-2(5H)-ylidene)-2-((4-fluorophenyl)amino)-8-oxa-2-azaspiro[4.5]decan-3-one (**8j**)

Orange powder; yield 62% (0.25 g); mp 186-188 °C. <sup>1</sup>H NMR (300 MHz, DMSO-*d*<sub>6</sub>) δ 7.10 – 6.98 (m, 2H), 6.77 – 6.67 (m, 2H), 4.42 – 4.05 (m, 2H in H<sub>2</sub>O), 3.86 – 3.77 (m, 2H), 3.50 – 3.40 (m, 2H), 2.86 (s, 2H), 2.39 (d, *J* = 14.0 Hz, 2H), 2.24 (s, 3H), 1.53 (d, *J* = 13.0 Hz, 2H). <sup>13</sup>C NMR (126 MHz, DMSO-*d*<sub>6</sub>) δ 190.4, 177.5, 171.3, 167.1, 157.5 (d, *J* = 236.6 Hz), 142.0, 138.5, 127.2 (d, *J* = 6.5 Hz), 115.8 (d, *J* = 16.8 Hz), 115.6, 97.5, 63.3, 38.9, 37.8, 32.6, 28.4. HRMS (ESI-TOF) *m/z*: [M+H]<sup>+</sup> Calcd for C<sub>20</sub>H<sub>20</sub>FN<sub>2</sub>O<sub>6</sub>: 403.1300; Found: 403.1307.

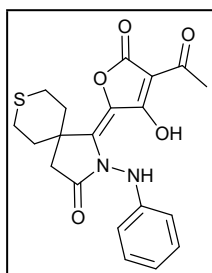

*(E)*-1-(4-acetyl-3-hydroxy-5-oxofuran-2(5H)-ylidene)-2-(phenylamino)-8-thia-2-azaspiro[4.5]decan-3-one (**8k**)

Yellowish powder; yield 71% (0.28 g); mp 212-214 °C. <sup>1</sup>H NMR (300 MHz, DMSO-*d*<sub>6</sub>) δ 7.28 – 7.17 (m, 2H), 6.96 – 6.85 (m, 1H), 6.70 (d, *J* = 7.9 Hz, 2H), 4.22 – 3.94 (m, 2H in H<sub>2</sub>O), 2.84 (d, *J* = 13.5 Hz, 2H), 2.77 (s, 2H), 2.49 – 2.36 (m, 4H), 2.23 (s, 3H), 1.92 (d, *J* = 13.6 Hz, 2H). <sup>13</sup>C NMR (75 MHz, DMSO-*d*<sub>6</sub>) δ 190.4, 177.4, 171.1, 167.1, 145.6, 139.3, 129.2, 127.1, 121.6, 114.1, 97.6, 40.6, 37.1, 33.0, 28.5, 23.4. HRMS (ESI-TOF) *m/z*: [M+H]<sup>+</sup> Calcd for C<sub>20</sub>H<sub>21</sub>N<sub>2</sub>O<sub>5</sub>S: 401.1166;

Found: 401.1173.

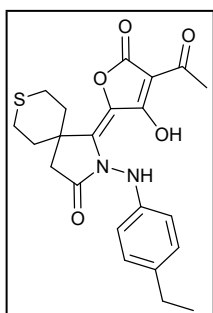

*(E)*-1-(4-acetyl-3-hydroxy-5-oxofuran-2(5H)-ylidene)-2-((4-ethylphenyl)amino)-8-thia-2-azaspiro[4.5]decan-3-one (**8l**)

Yellowish powder; yield 62% (0.27 g); mp 203-205 °C. <sup>1</sup>H NMR (300 MHz, DMSO-*d*<sub>6</sub>) δ 7.08 (d, *J* = 7.9 Hz, 2H), 6.94 – 6.80 (m, 2H), 6.70 (d, *J* = 7.9 Hz, 2H), 2.89 – 2.71 (m, 4H), 2.61 – 2.53 (m, 2H), 2.49 – 2.35 (m, 4H), 2.25 (s, 3H), 1.92 (d, *J* = 10.9 Hz, 2H), 1.11 (t, *J* = 7.6 Hz, 3H). <sup>13</sup>C NMR (75 MHz, DMSO-*d*<sub>6</sub>) δ 190.5, 176.1, 171.1, 166.7, 142.8, 140.5, 137.7, 128.5, 126.3, 114.7, 98.0, 40.8, 37.0, 33.0, 28.5, 27.4, 23.3, 15.7. HRMS (ESI-TOF) *m/z*: [M+H]<sup>+</sup> Calcd for C<sub>22</sub>H<sub>25</sub>N<sub>2</sub>O<sub>5</sub>S: 429.1479; Found: 429.1467.

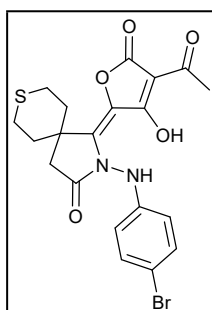

*(E)*-1-(4-acetyl-3-hydroxy-5-oxofuran-2(5H)-ylidene)-2-((4-bromophenyl)amino)-8-thia-2-azaspiro[4.5]decan-3-one (**8m**)

Yellowish powder; yield 76% (0.36 g); mp 208-210 °C. <sup>1</sup>H NMR (300 MHz, DMSO-*d*<sub>6</sub>) δ 7.34 (d, *J* = 8.4 Hz, 2H), 6.61 (d, *J* = 8.4 Hz, 2H), 4.29 - 3.92 (m, 2H in H<sub>2</sub>O), 2.82 (d, *J* = 12.8 Hz, 2H), 2.75 (s, 2H), 2.49 - 2.33 (m, 4H), 2.23 (s, 3H), 1.90 (d, *J* = 12.9 Hz, 2H). <sup>13</sup>C NMR (75 MHz, DMSO-*d*<sub>6</sub>) δ 190.6, 178.5, 171.1, 167.3, 145.6, 138.4, 131.8, 127.6, 115.9, 112.4, 109.6, 97.3, 37.1, 33.0, 28.2, 23.4. HRMS (ESI-TOF) *m/z*: [M+H]<sup>+</sup> Calcd for C<sub>20</sub>H<sub>20</sub>BrN<sub>2</sub>O<sub>5</sub>S: 479.0267; Found: 479.0271.

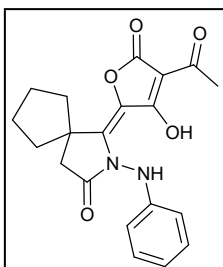

(*E*)-1-(4-acetyl-3-hydroxy-5-oxofuran-2(5H)-ylidene)-2-(phenylamino)-2-azaspiro[4.4]nonan-3-one (**8n**)

Yellowish powder; yield 54% (0.2 g); mp 192-194 °C. <sup>1</sup>H NMR (300 MHz, DMSO-*d*<sub>6</sub>) δ 7.29 - 7.19 (m, 2H), 6.98 - 6.89 (m, 1H), 6.74 (d, *J* = 7.9 Hz, 2H), 4.97 - 4.54 (m, 2H in H<sub>2</sub>O), 2.70 (s, 2H), 2.38 - 2.14 (m, 5H), 1.89 - 1.62 (m, 6H). <sup>13</sup>C NMR (126 MHz, DMSO-*d*<sub>6</sub>) δ 190.7, 176.1, 171.6, 166.7, 145.2, 140.6, 129.2, 125.8, 121.9, 114.1, 98.1, 46.8, 43.2, 37.9, 28.2, 24.3. HRMS (ESI-TOF) *m/z*: [M+H]<sup>+</sup> Calcd for C<sub>20</sub>H<sub>21</sub>N<sub>2</sub>O<sub>5</sub>: 369.1445; Found: 369.1437.

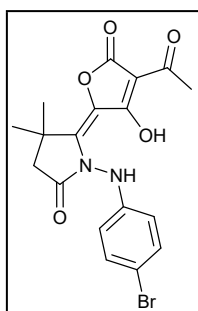

(*E*)-5-(4-acetyl-3-hydroxy-5-oxofuran-2(5H)-ylidene)-1-((4-bromophenyl)amino)-4,4-dimethylpyrrolidin-2-one (**8o**)

Yellowish powder; yield 60% (0.25 g); mp 177-179 °C. <sup>1</sup>H NMR (300 MHz, DMSO-*d*<sub>6</sub>) δ 7.38 (d, *J* = 8.2 Hz, 2H), 6.66 (d, *J* = 8.5 Hz, 2H), 6.63 - 6.54 (m, 2H), 2.64 (s, 2H), 2.25 (s, 3H), 1.43 (s, 6H). <sup>13</sup>C NMR (126 MHz, DMSO-*d*<sub>6</sub>) δ 190.7, 177.5, 171.3, 166.9, 145.4, 140.2, 131.7, 126.8, 116.0, 112.6, 97.7, 43.2, 36.7, 28.0, 26.4. HRMS (ESI-TOF) *m/z*: [M+H]<sup>+</sup> Calcd for C<sub>18</sub>H<sub>18</sub>BrN<sub>2</sub>O<sub>5</sub>: 421.0377; Found: 421.0394.

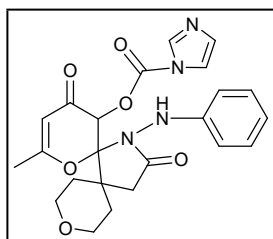

2-methyl-4,14-dioxo-15-(phenylamino)-1,10-dioxo-15-azadispiro[5.0.57.36]pentadec-2-en-5-yl 1H-imidazole-1-carboxylate (**14a**)

White powder; yield 59% (0.27 g); mp 168-170 °C. <sup>1</sup>H NMR (300 MHz, DMSO-*d*<sub>6</sub>) δ 8.40 (d, *J* = 12.6 Hz, 2H), 7.74 (s, 1H), 7.23 - 7.11 (m, 3H), 6.85 - 6.71 (m, 3H), 6.09 (s, 1H), 5.27 (s, 1H), 3.89 (dd, *J* = 11.8, 4.6 Hz, 1H), 3.81 - 3.71 (m, 1H), 3.61 - 3.49 (m, 1H), 3.45 - 3.37 (m, 1H), 2.80 (d, *J* = 17.1 Hz, 1H), 2.61 (d, *J* = 17.2 Hz, 1H), 2.32 - 2.18 (m, 1H), 1.96 - 1.88 (m, 1H), 1.85 (s, 3H), 1.68 (d, *J* = 13.6 Hz, 1H), 1.37 (d, *J* = 12.5 Hz, 1H). <sup>13</sup>C NMR (75 MHz, DMSO-*d*<sub>6</sub>) δ 184.03, 171.26, 170.56, 147.20, 147.06, 138.11, 130.46, 128.63, 120.04, 118.11, 113.16, 101.06, 99.32, 71.61, 63.33, 63.25, 41.48, 36.36, 31.72, 31.19, 20.33. HRMS (ESI-TOF) *m/z*: [M+H]<sup>+</sup> Calcd for C<sub>23</sub>H<sub>25</sub>N<sub>4</sub>O<sub>6</sub>: 453.1769; Found: 453.1761.

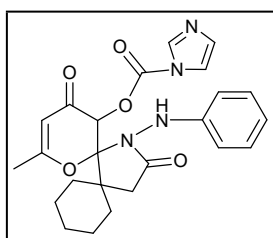

2-methyl-4,14-dioxo-15-(phenylamino)-1-oxa-15-azadispiro[5.0.57.36]pentadec-2-en-5-yl 1H-imidazole-1-carboxylate (**14b**)

White powder; yield 43% (0.19 g); mp 171-173 °C. <sup>1</sup>H NMR (300 MHz, DMSO-*d*<sub>6</sub>) δ 8.43 (s, 1H), 8.34 (s, 1H), 7.74 (s, 1H), 7.25 - 7.12 (m, 3H), 6.85 - 6.71 (m, 3H), 6.02 (s, 1H), 5.26 (s, 1H), 2.65 (d, *J* = 17.0 Hz, 1H), 2.42 (d, *J* = 17.1 Hz, 1H), 1.90 - 1.30 (m, 12H), 1.21 - 1.08 (m, 1H). <sup>13</sup>C NMR (75 MHz, DMSO-*d*<sub>6</sub>) δ 184.07, 171.55, 170.65, 147.35, 147.07, 138.09, 130.52, 128.62, 120.01, 118.07,

113.16, 100.97, 99.90, 71.87, 43.33, 37.08, 31.44, 31.02, 25.01, 22.09, 21.83, 20.37. HRMS (ESI-TOF)  $m/z$ :  $[M+H]^+$  Calcd for  $C_{24}H_{27}N_4O_5$ ; 451.1976; Found: 451.1975.

## 5. Characterization data for compounds 16-19

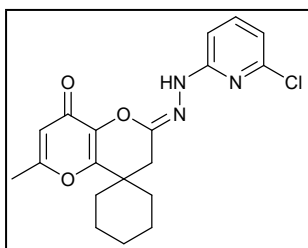

*(Z)*-2'-(2-(6-chloropyridin-2-yl)hydrazineylidene)-6'-methyl-2',3'-dihydro-8'H-spiro[cyclohexane-1,4'-pyrano[3,2-b]pyran]-8'-one (**16a**)

Yellowish powder; yield 62% (0.23 g); mp 246-248 °C.  $^1H$  NMR (300 MHz,  $DMSO-d_6$ )  $\delta$  9.23 (s, 1H), 7.71 – 7.56 (m, 1H), 6.99 (d,  $J = 8.3$  Hz, 1H), 6.79 (d,  $J = 7.6$  Hz, 1H), 6.32 (s, 1H), 2.85 (s, 2H), 2.31 (s, 3H), 1.88 – 1.73 (m, 2H), 1.71 – 1.41 (m, 7H), 1.38 – 1.21 (m, 1H).  $^{13}C$  NMR (126 MHz,  $DMSO-d_6$ )  $\delta$  170.2, 164.7, 156.8, 155.8, 148.2, 141.1, 141.0, 136.8, 113.8, 113.5, 104.9, 36.7, 33.0, 31.9, 24.8, 20.5, 19.90. HRMS (ESI-TOF)  $m/z$ :  $[M+H]^+$  Calcd for  $C_{19}H_{21}ClN_3O_3$ ; 374.1266; Found: 374.1252.

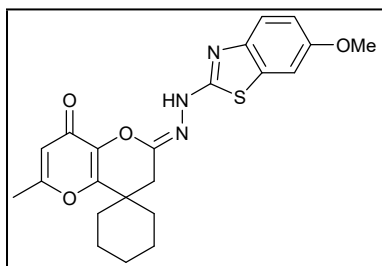

*(Z)*-2'-(2-(6-methoxybenzo[d]thiazol-2-yl)hydrazineylidene)-6'-methyl-2',3'-dihydro-8'H-spiro[cyclohexane-1,4'-pyrano[3,2-b]pyran]-8'-one (**16b**)

Pale brown powder; yield 79% (0.34 g); mp 252-254 °C.  $^1H$  NMR (300 MHz,  $DMSO-d_6$ )  $\delta$  11.17 (br.s, 1H), 7.35 (s, 1H), 7.26 (d,  $J = 9.0$  Hz, 1H), 6.86 (d,  $J = 8.3$  Hz, 1H), 6.31 (s, 1H), 3.75 (s, 3H), 2.85 (s, 2H), 2.31 (s, 3H), 1.90 – 1.75 (m, 2H), 1.63 – 1.47 (m, 7H), 1.40 – 1.27 (m, 1H).  $^{13}C$  NMR (151 MHz,  $DMSO-d_6$ )  $\delta$  170.4, 165.3, 164.8, 156.1, 154.6, 143.3, 137.1, 117.2, 113.6, 113.4, 106.1, 55.6, 36.6, 33.2, 31.9, 24.9, 20.6, 19.1. HRMS (ESI-TOF)  $m/z$ :  $[M+H]^+$  Calcd for  $C_{22}H_{24}N_3O_4S$ ; 426.1482; Found: 426.1475.

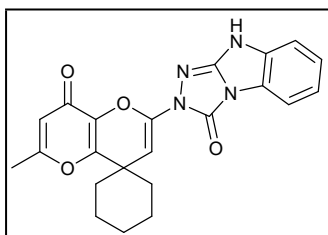

2-(6'-methyl-8'-oxo-8'H-spiro[cyclohexane-1,4'-pyrano[3,2-b]pyran]-2'-yl)-2,9-dihydro-3H-benzo[4,5]imidazo[2,1-c][1,2,4]triazol-3-one (**17**)

White powder; yield 44% (0.18 g); mp 263-265 °C.  $^1H$  NMR (300 MHz,  $DMSO-d_6$ )  $\delta$  11.67 (br.s, 1H), 7.62 (d,  $J = 7.9$  Hz, 1H), 7.38 – 7.13 (m, 3H), 6.28 (s, 1H), 5.78 (s, 1H), 2.31 (s, 3H), 2.05 – 1.92 (m, 2H), 1.85 – 1.55 (m, 7H), 1.41 – 1.21 (m, 1H).  $^{13}C$  NMR (126 MHz,  $DMSO-d_6$ )  $\delta$  170.1, 165.4, 152.9, 147.8, 145.8, 138.0, 136.8, 136.4, 125.3, 123.5, 121.0, 113.3, 111.4, 111.3, 100.0, 37.4, 36.2, 24.8, 20.1, 19.1. HRMS (ESI-TOF)  $m/z$ :  $[M+H]^+$  Calcd for  $C_{22}H_{21}N_4O_4$ ; 405.1557; Found: 405.1558.

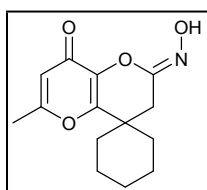

*(Z)*-2'-(hydroxyimino)-6'-methyl-2',3'-dihydro-8'H-spiro[cyclohexane-1,4'-pyrano[3,2-b]pyran]-8'-one (**18a**)

White powder; yield 51% (0.13 g); mp 178-180 °C.  $^1H$  NMR (300 MHz,  $DMSO-d_6$ )  $\delta$  10.14 (s, 1H), 6.25 (s, 1H), 2.66 (s, 2H), 2.28 (s, 3H), 1.85 – 1.73 (m, 2H), 1.67 – 1.44 (m, 7H), 1.34 – 1.21 (m, 1H).  $^{13}C$  NMR (75 MHz,  $DMSO-d_6$ )  $\delta$  170.4, 164.4, 155.6,



146.1, 136.9, 113.4, 36.2, 31.8, 31.4, 24.8, 20.4, 18.9. HRMS (ESI-TOF)  $m/z$ :  $[M+H]^+$  Calcd for  $C_{14}H_{18}NO_4$ : 264.1230; Found: 264.1231.

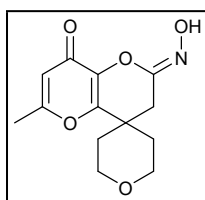

*(Z)*-2'-(hydroxyimino)-6'-methyl-2,2',3,3',5,6-hexahydro-8'H-spiro[pyran-4,4'-pyrano[3,2-b]pyran]-8'-one (**18b**)

White powder; yield 57% (0.15 g); mp 122-124 °C.  $^1H$  NMR (300 MHz, DMSO- $d_6$ )  $\delta$  10.21 (s, 1H), 6.27 (s, 1H), 3.84 – 3.56 (m, 4H), 2.79 (s, 2H), 2.30 (s, 3H), 2.07 – 1.88 (m, 2H), 1.47 (d,  $J = 13.6$  Hz, 2H).  $^{13}C$  NMR (75 MHz, DMSO- $d_6$ )  $\delta$  170.4, 164.6, 154.4, 145.7, 137.2, 113.5, 62.2, 34.1, 31.9, 31.6, 18.9. HRMS (ESI-TOF)  $m/z$ :  $[M+H]^+$

Calcd for  $C_{13}H_{16}NO_5$ : 266.1023; Found: 266.1021.

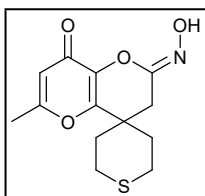

*(Z)*-2-(hydroxyimino)-6-methyl-2,2',3,3',5',6'-hexahydro-8H-spiro[pyrano[3,2-b]pyran-4,4'-thiopyran]-8-one (**18c**)

White powder; yield 61% (0.17 g); mp 206-208 °C.  $^1H$  NMR (600 MHz, DMSO- $d_6$ )  $\delta$  10.37 (s, 1H), 6.25 (s, 1H), 3.01 (s, 2H), 2.88 – 2.78 (m, 2H), 2.60 (d,  $J = 14.6$  Hz, 2H), 2.30 (s, 3H), 2.15 – 2.04 (m, 2H), 1.79 (d,  $J = 13.7$  Hz, 2H).  $^{13}C$  NMR (75 MHz, DMSO- $d_6$ )  $\delta$  170.6, 164.7, 156.0, 153.7, 137.6, 113.2, 35.2, 33.2, 25.2, 22.5, 19.0. HRMS (ESI-

TOF)  $m/z$ :  $[M+H]^+$  Calcd for  $C_{13}H_{16}NO_4S$ : 282.0795; Found: 282.0790.

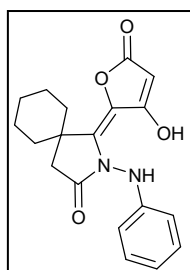

*(E)*-1-(3-hydroxy-5-oxofuran-2(5H)-ylidene)-2-(phenylamino)-2-azaspiro[4.5]decan-3-one (**19**)

Orange powder; yield 95% (0.32 g); mp 205-207 °C.  $^1H$  NMR (300 MHz, DMSO- $d_6$ )  $\delta$  7.40 – 7.28 (m, 2H), 7.13 – 7.03 (m, 1H), 6.94 (d,  $J = 7.9$  Hz, 2H), 5.12 (s, 1H), 3.69 – 3.19 (m, 2H in  $H_2O$ ), 2.76 (s, 2H), 2.34 – 2.18 (m, 2H), 1.77 – 1.62 (m, 5H), 1.45 – 1.18 (m, 3H).  $^{13}C$  NMR (75 MHz, DMSO- $d_6$ )  $\delta$  171.5, 168.2, 167.5, 143.6, 140.4, 129.6, 125.1, 123.8, 115.4, 88.1, 41.7, 37.9, 33.2, 24.6, 21.6. HRMS (ESI-TOF)  $m/z$ :

$[M+H]^+$  Calcd for  $C_{19}H_{21}N_2O_4$ : 341.1496; Found: 341.1501.

## 6. Copies of $^1\text{H}$ and $^{13}\text{C}$ NMR spectra

### 6.1 Starting compounds 7 and 9

$^1\text{H}$  NMR spectrum (300 MHz) of **7a** in  $\text{DMSO-}d_6$

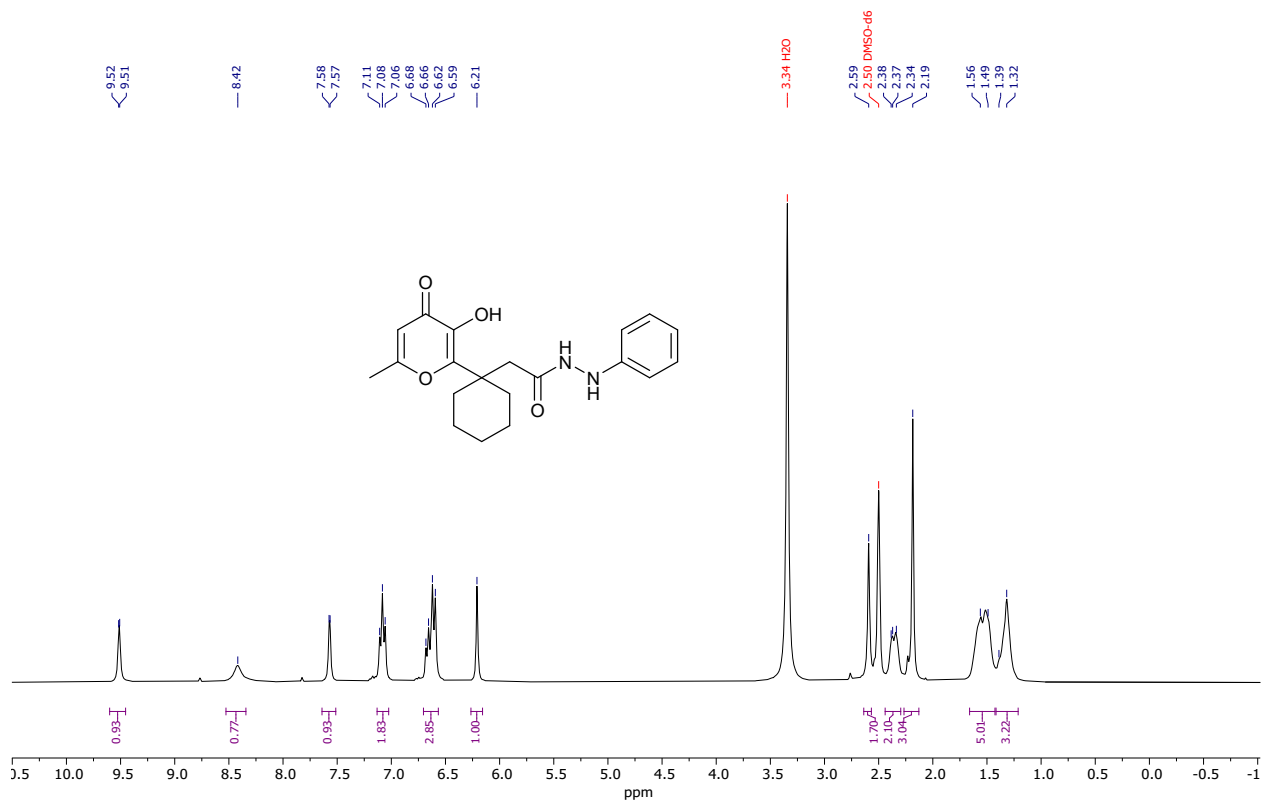

$^{13}\text{C}$   $\{^1\text{H}\}$  NMR spectrum (75 MHz) of **7a** in  $\text{DMSO-}d_6$

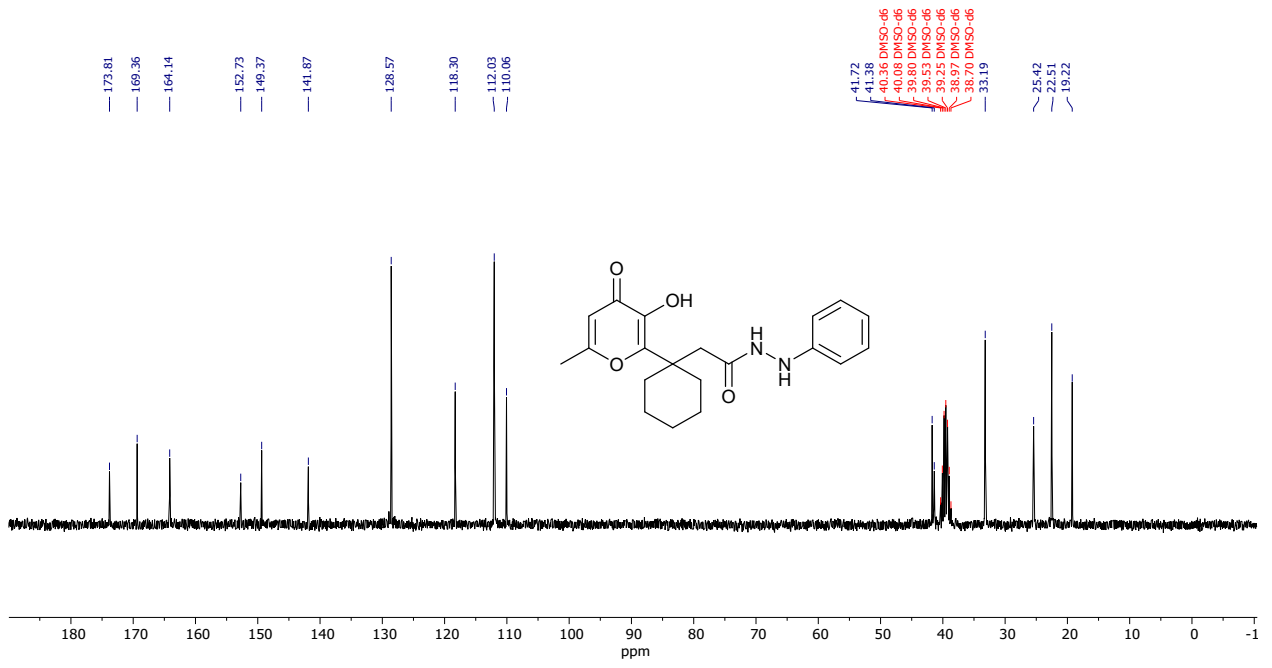

$^1\text{H}$  NMR spectrum (300 MHz) of **7b** in  $\text{DMSO-}d_6$

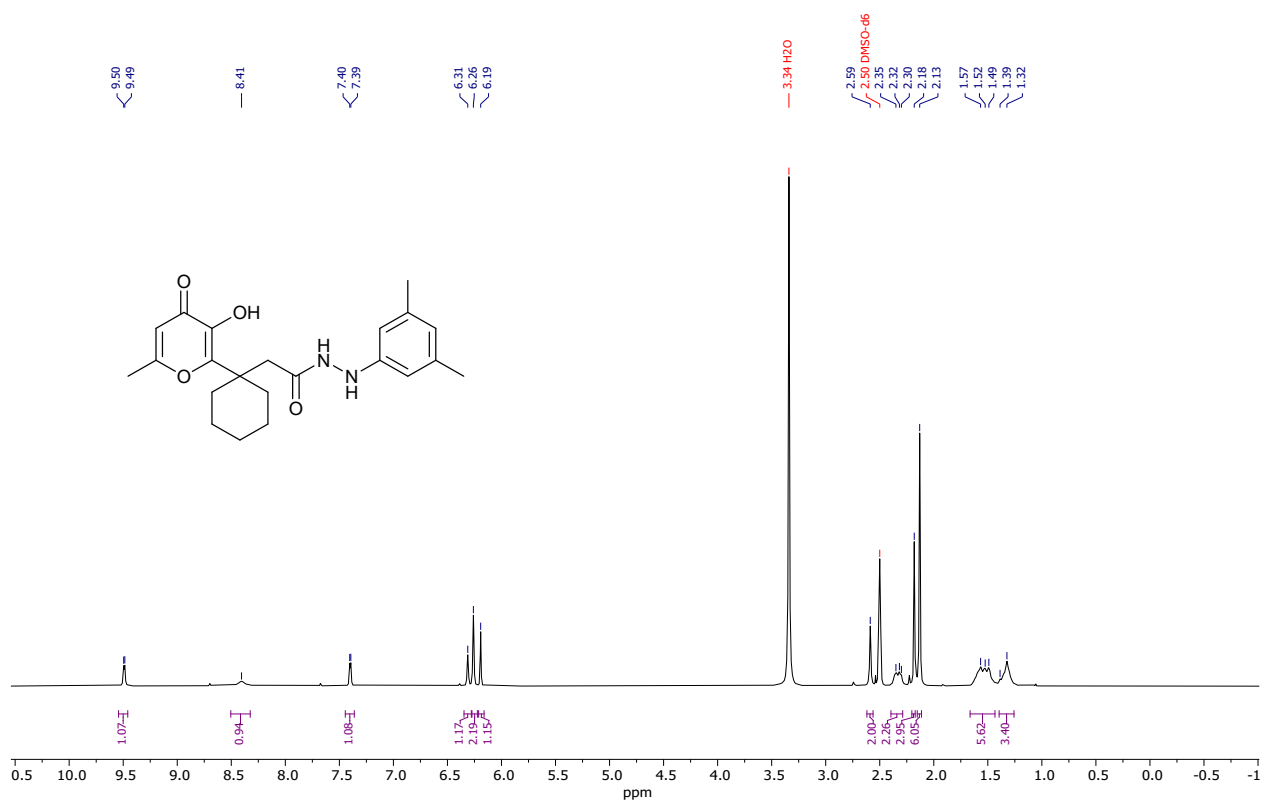

$^{13}\text{C}$   $\{^1\text{H}\}$  NMR spectrum (126 MHz) of **7b** in  $\text{DMSO-}d_6$

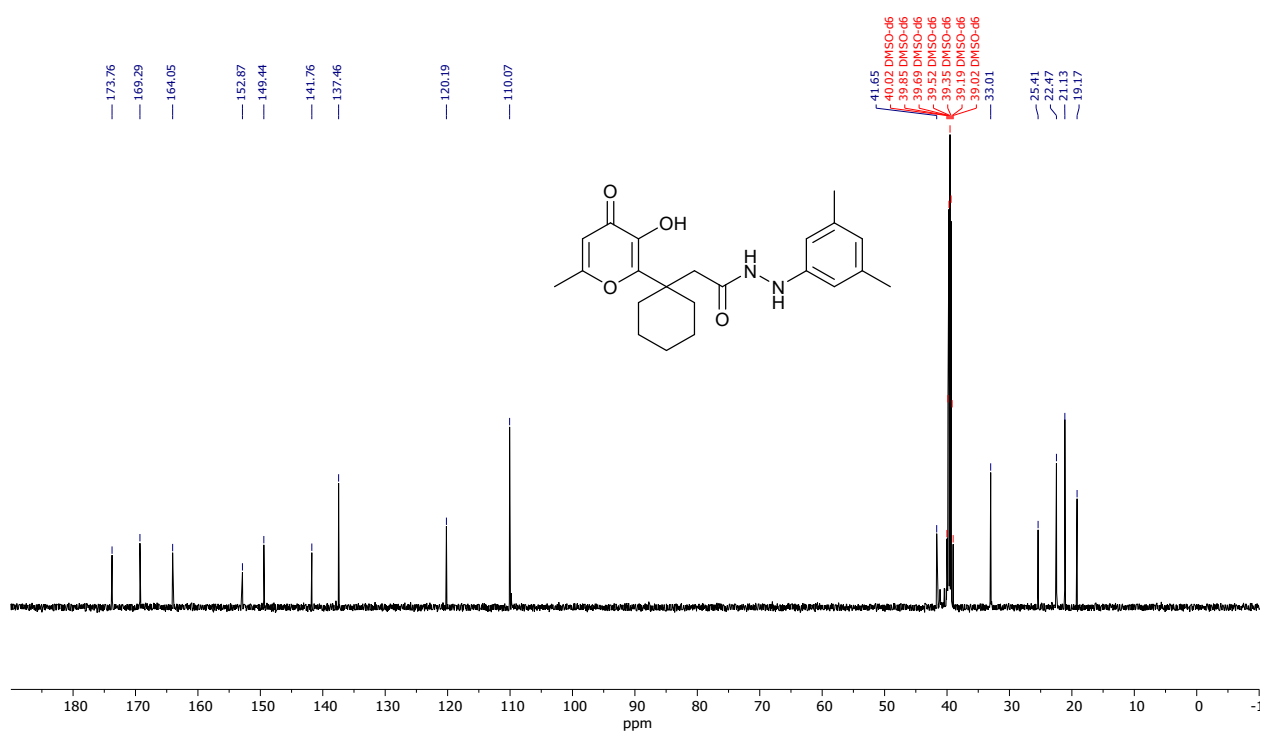



$^1\text{H}$  NMR spectrum (300 MHz) of **7c** in  $\text{DMSO-}d_6$

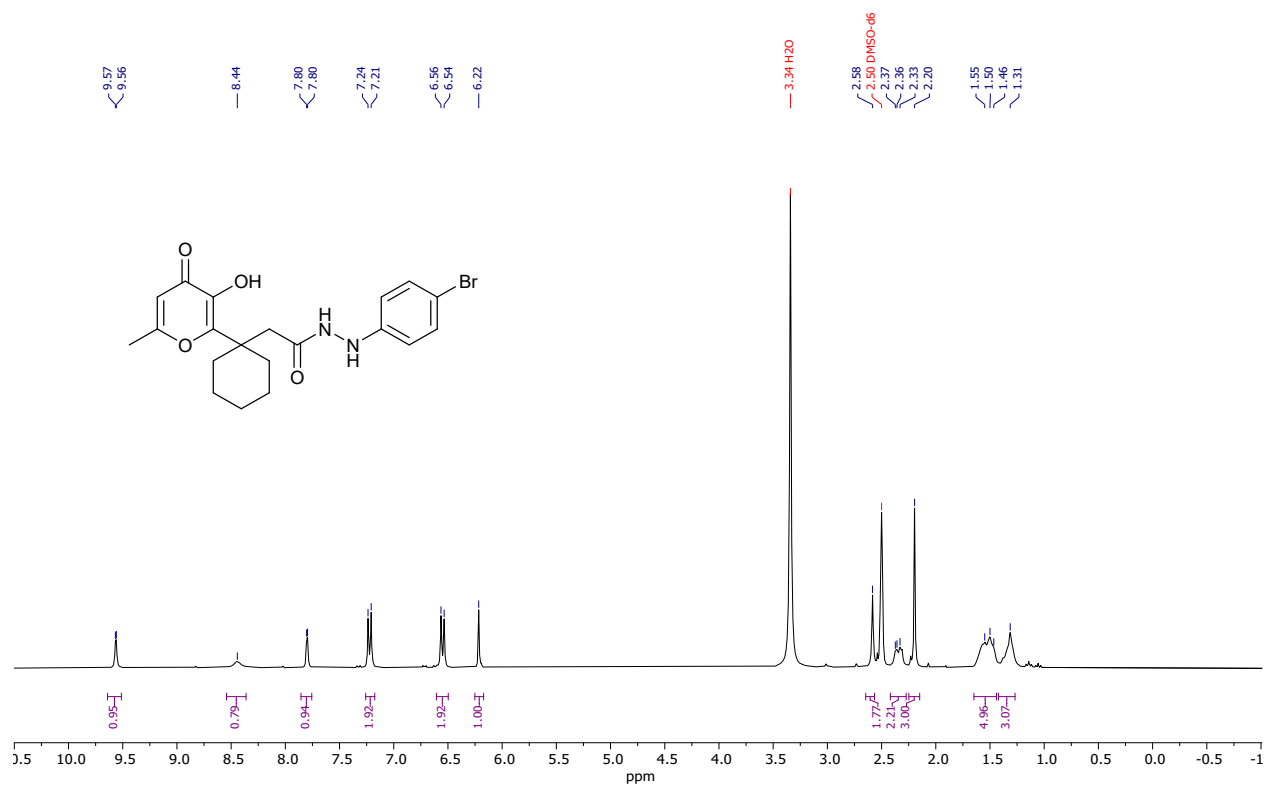

$^{13}\text{C}$   $\{^1\text{H}\}$  NMR spectrum (75 MHz) of **7c** in  $\text{DMSO-}d_6$

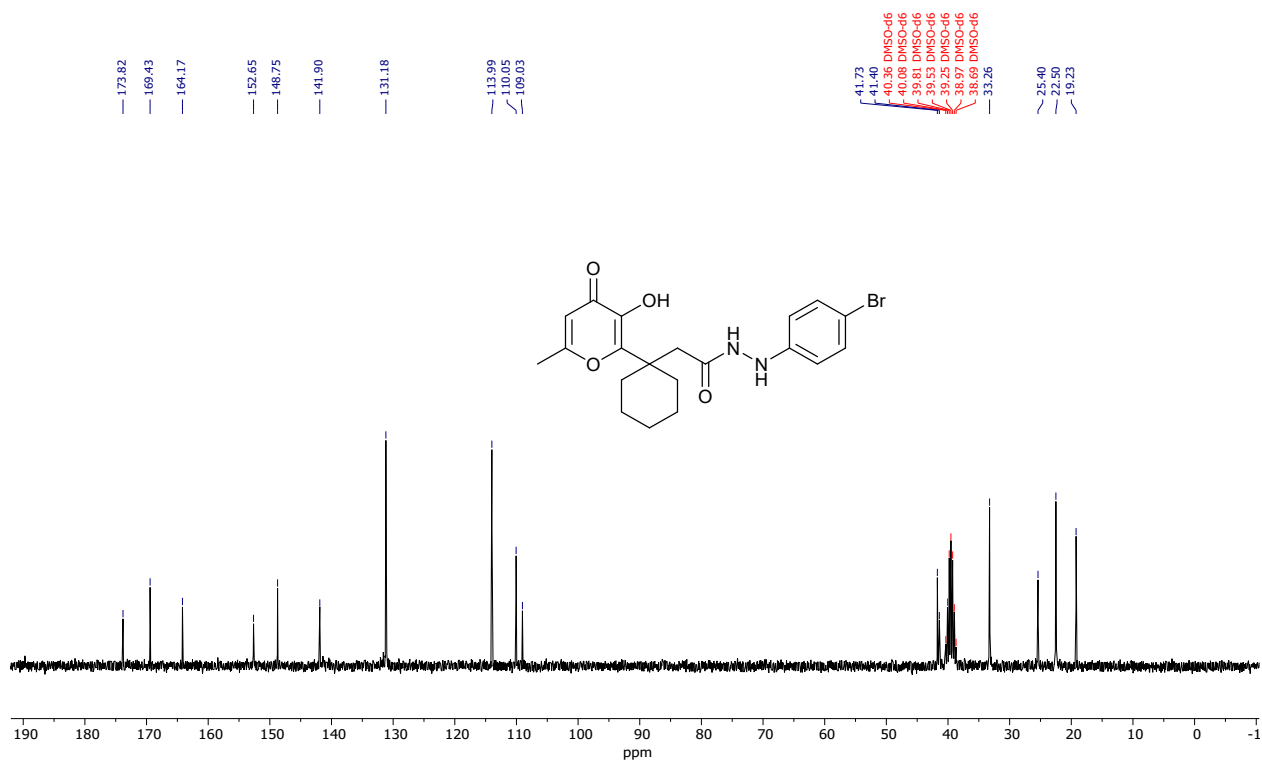



$^1\text{H}$  NMR spectrum (300 MHz) of **7d** in  $\text{DMSO-}d_6$

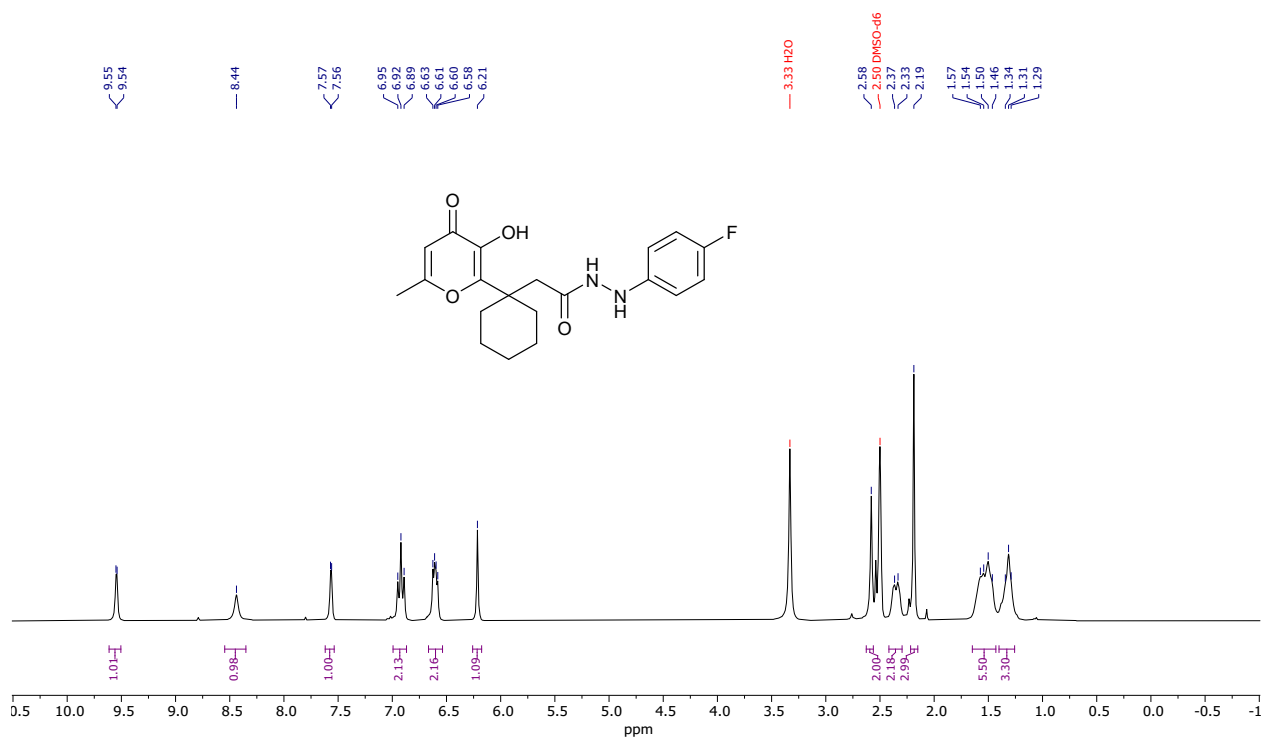

$^{13}\text{C}$  { $^1\text{H}$ } NMR spectrum (126 MHz) of **7d** in  $\text{DMSO-}d_6$

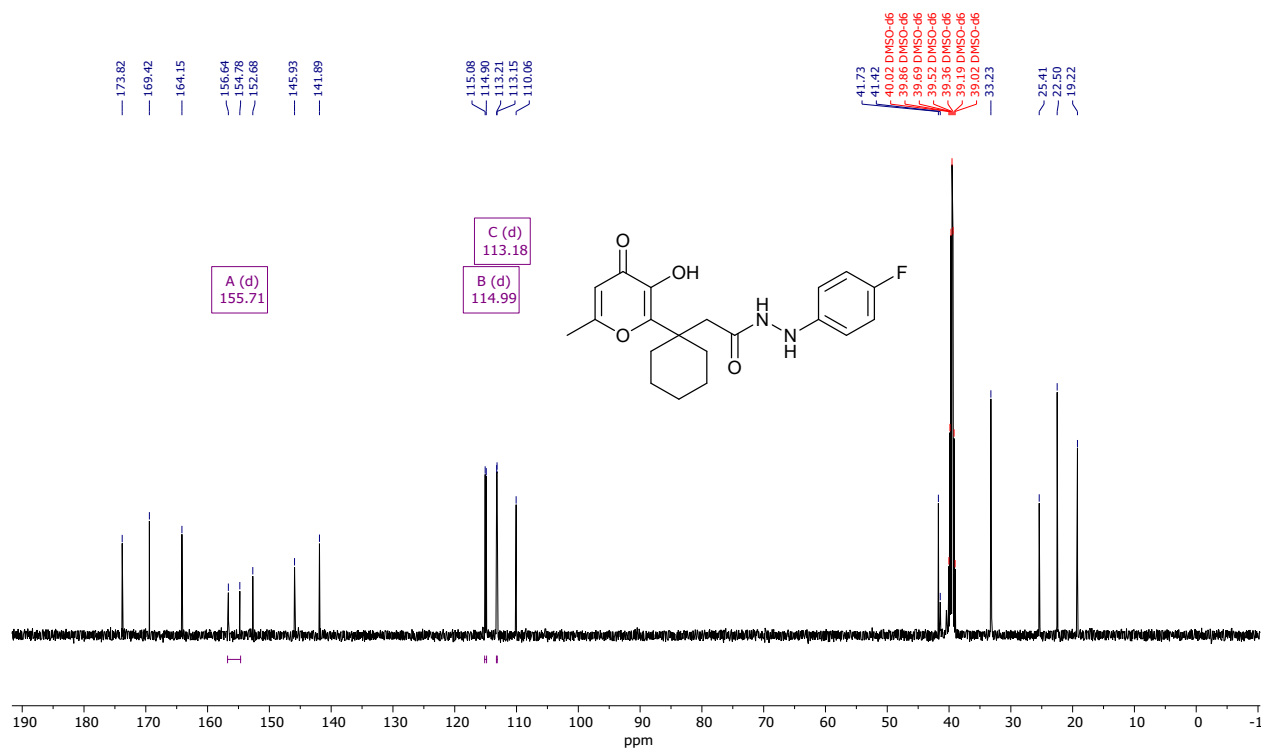



$^1\text{H}$  NMR spectrum (300 MHz) of **7e** in  $\text{DMSO-}d_6$

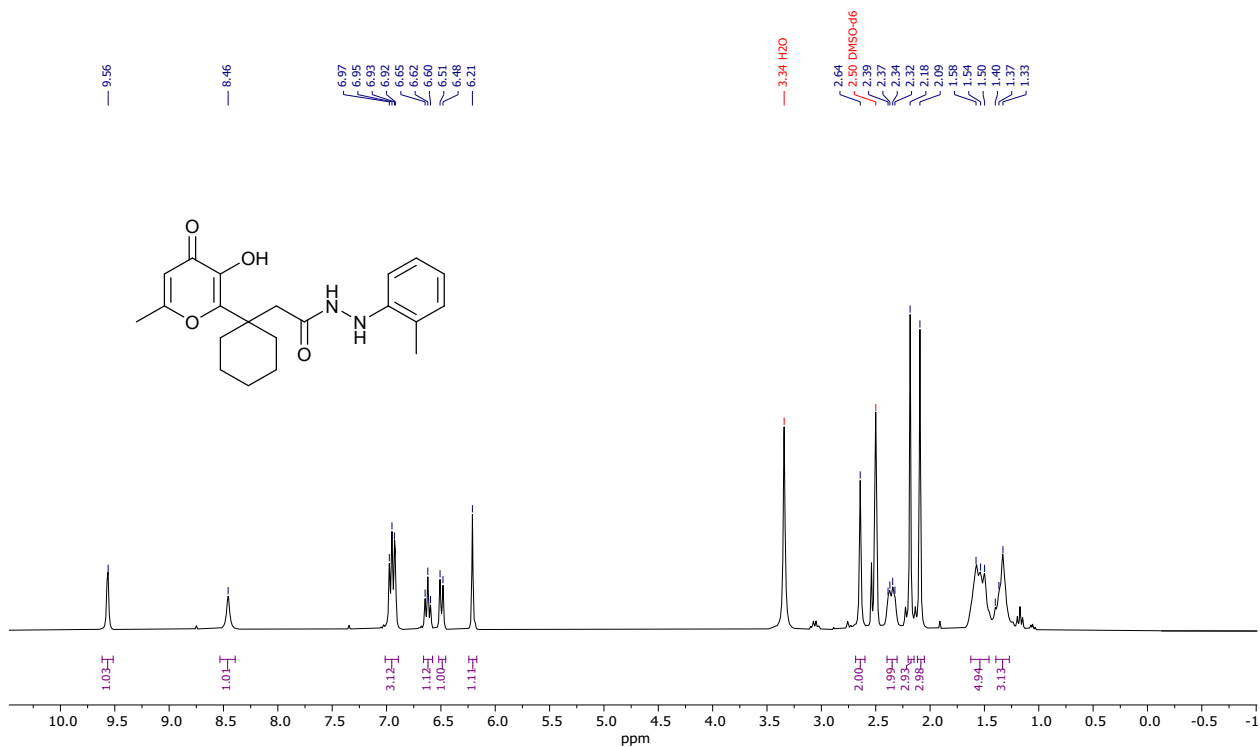

$^{13}\text{C}$   $\{^1\text{H}\}$  NMR spectrum (126 MHz) of **7e** in  $\text{DMSO-}d_6$

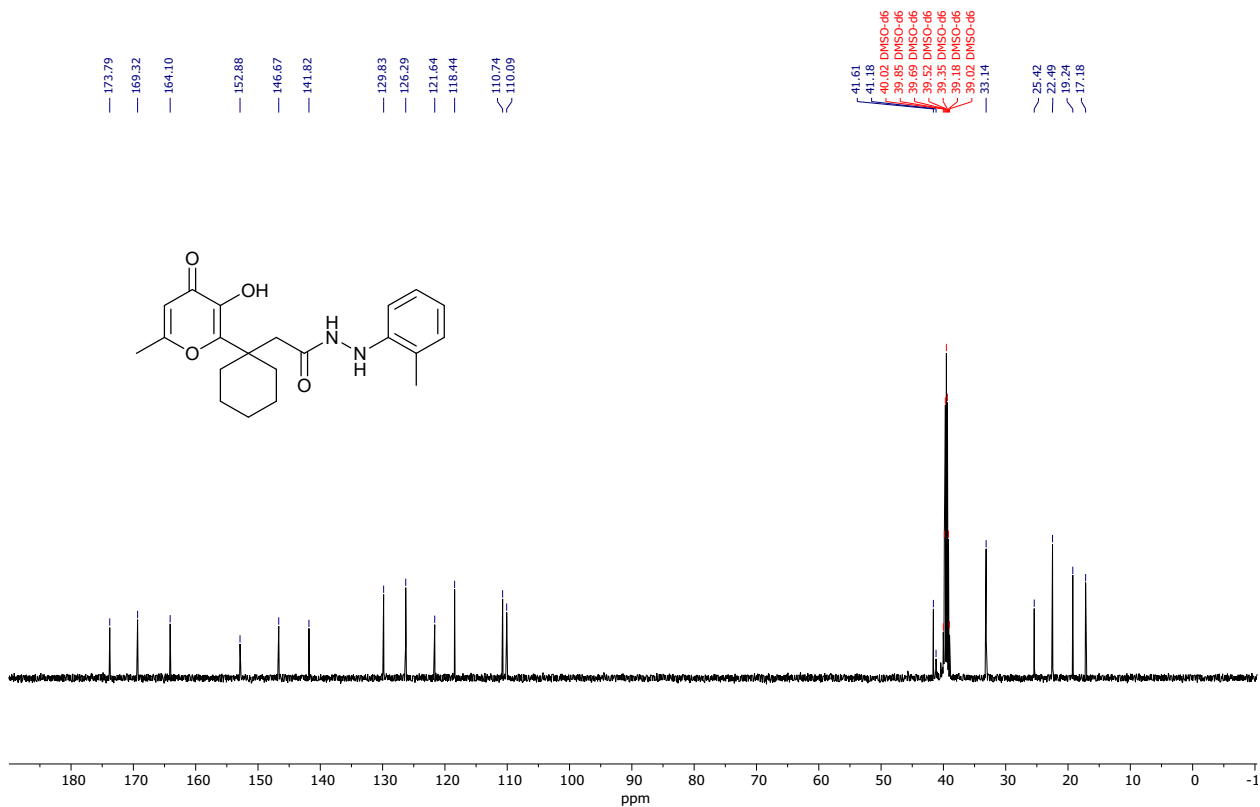



$^1\text{H}$  NMR spectrum (300 MHz) of **7f** in  $\text{DMSO-}d_6$

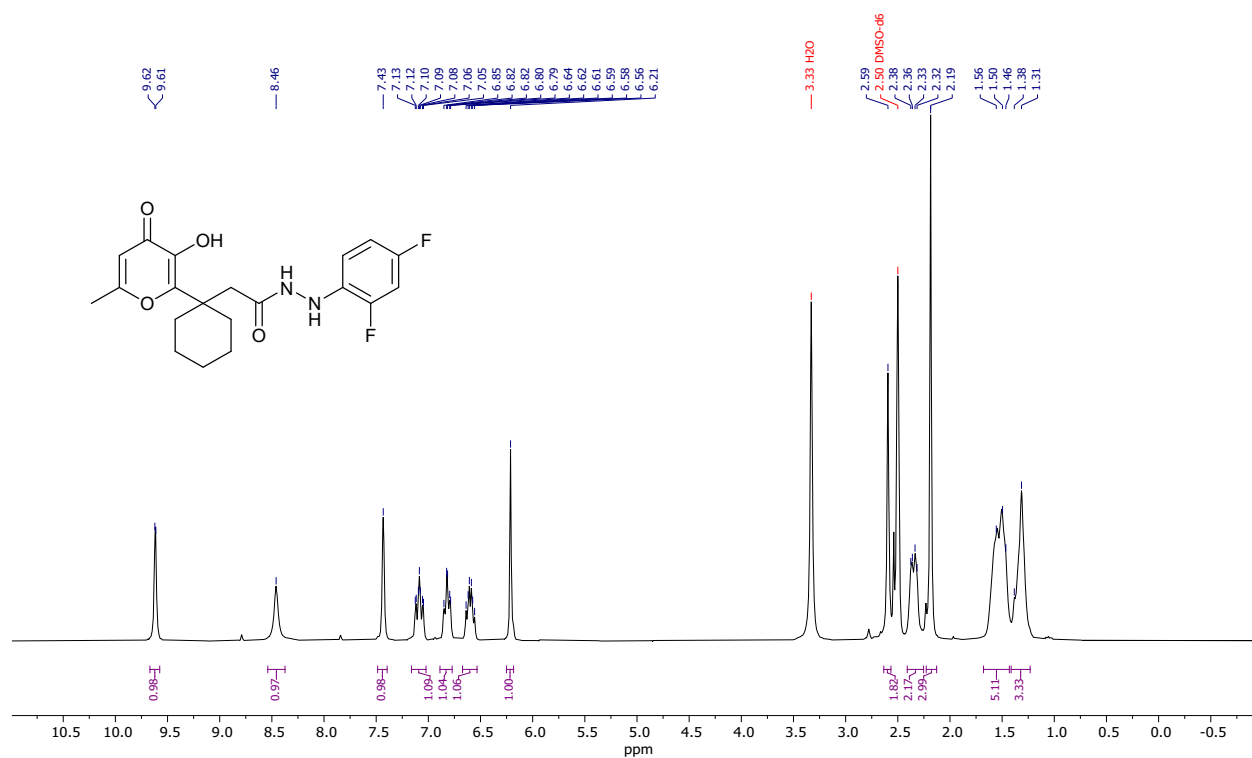

$^{13}\text{C}$   $\{^1\text{H}\}$  NMR spectrum (126 MHz) of **7f** in  $\text{DMSO-}d_6$

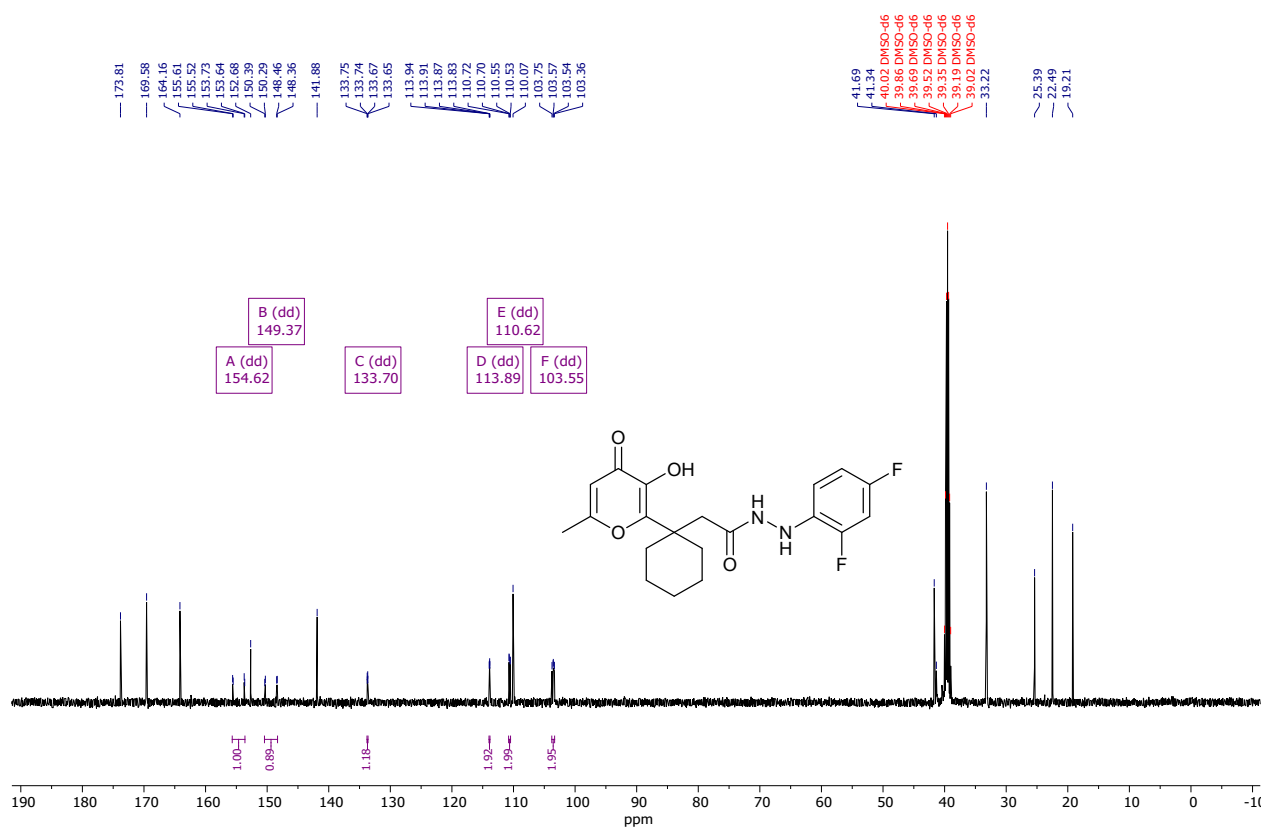

$^1\text{H}$  NMR spectrum (300 MHz) of **7g** in  $\text{DMSO-}d_6$

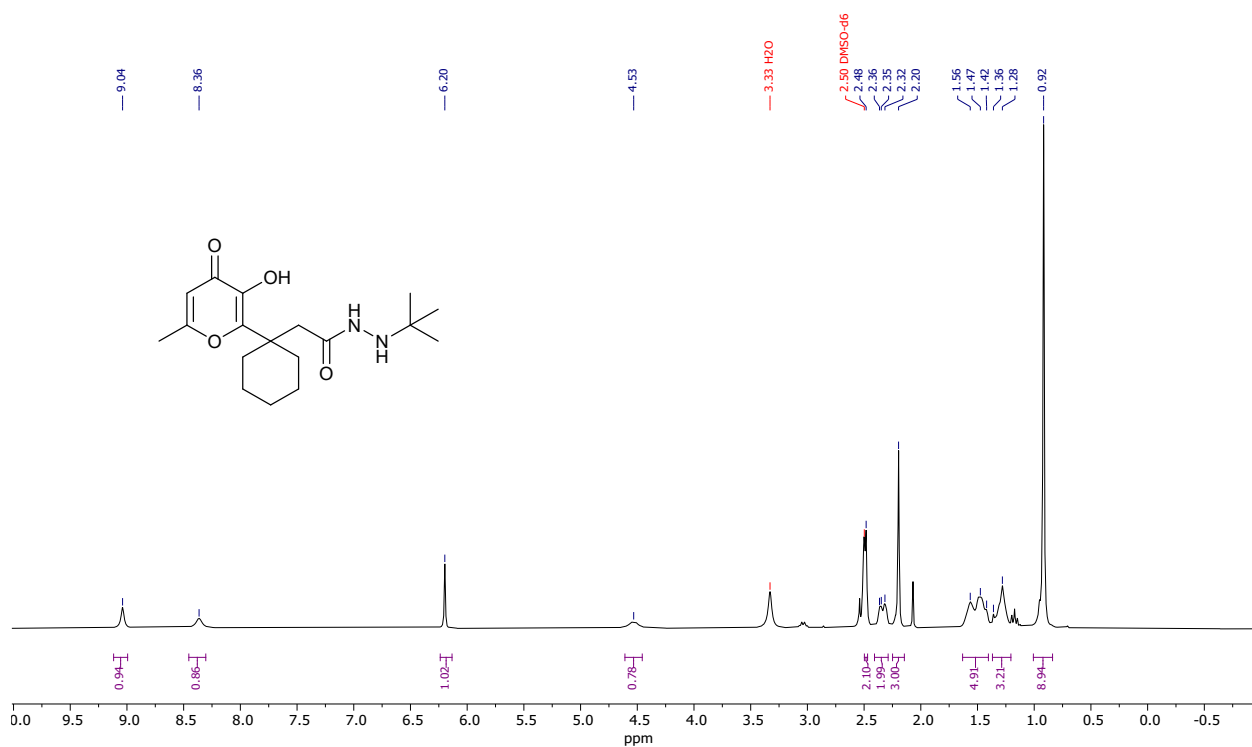

$^{13}\text{C}$   $\{^1\text{H}\}$  NMR spectrum (75 MHz) of **7g** in  $\text{DMSO-}d_6$

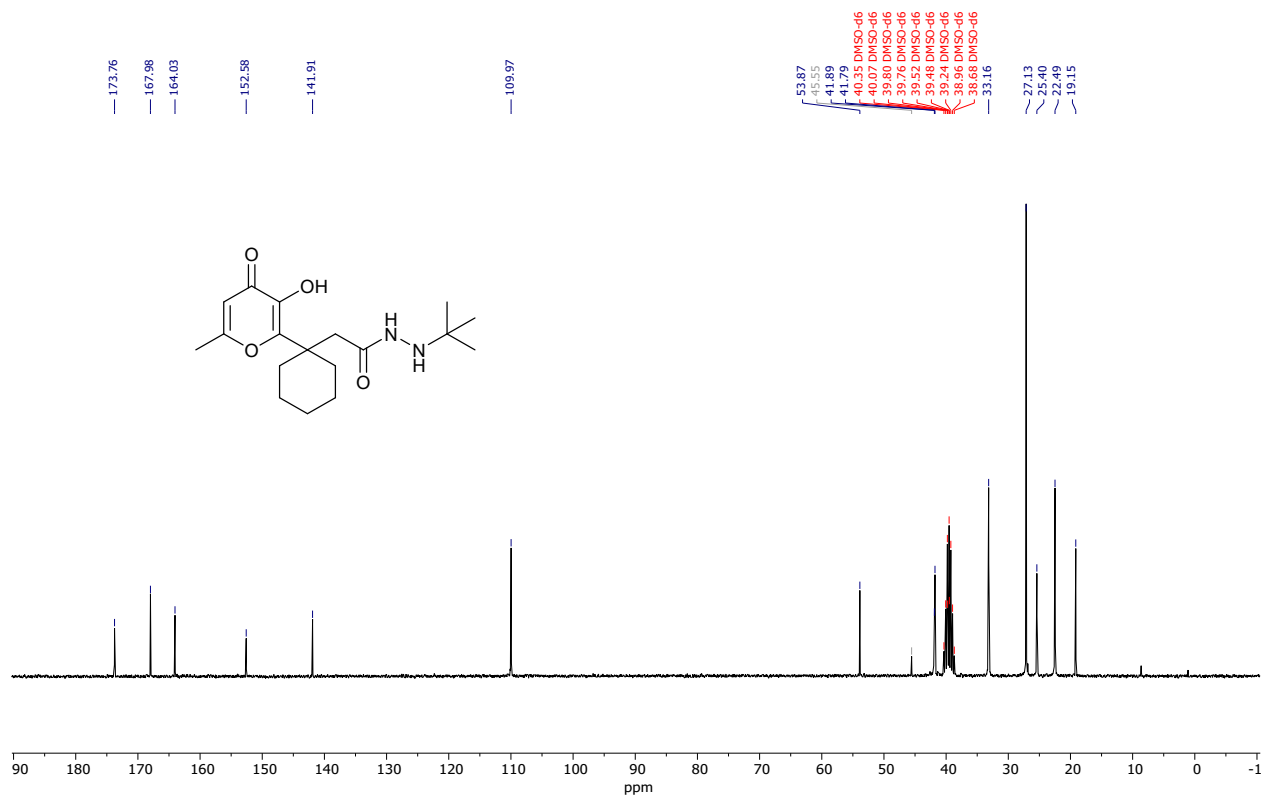

$^1\text{H}$  NMR spectrum (300 MHz) of **7h** in  $\text{DMSO-}d_6$

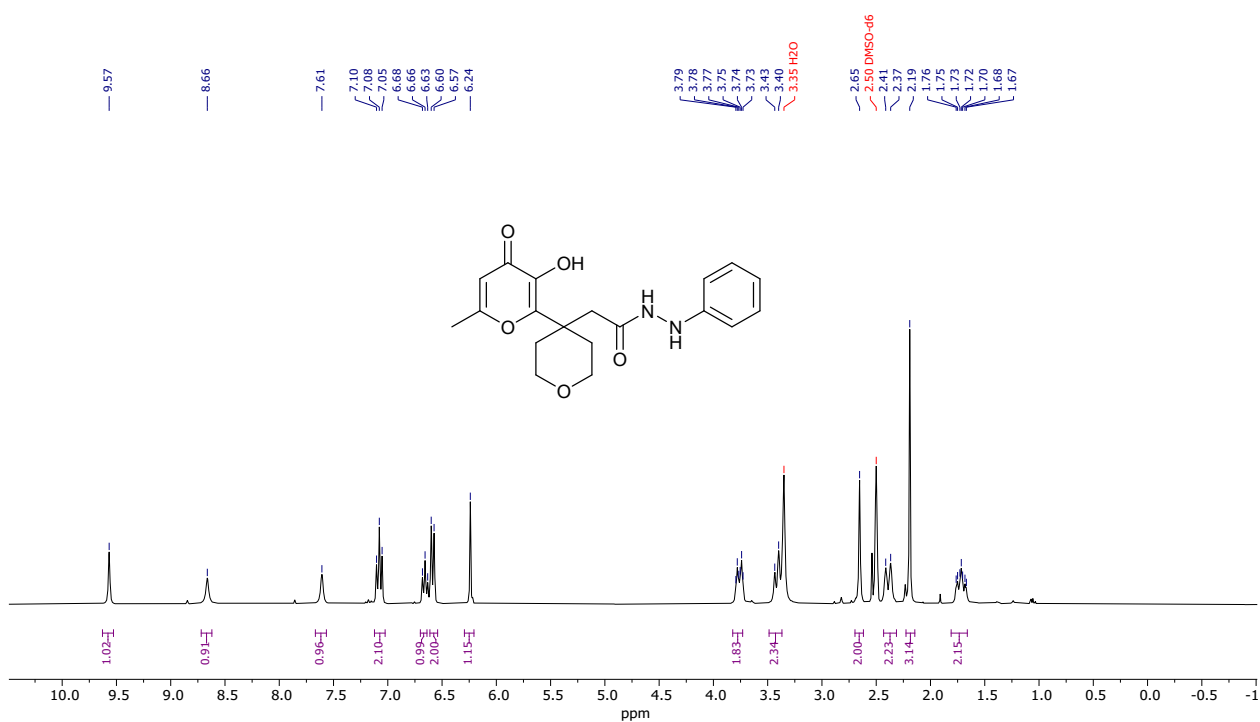

$^{13}\text{C}$   $\{^1\text{H}\}$  NMR spectrum (151 MHz) of **7h** in  $\text{DMSO-}d_6$

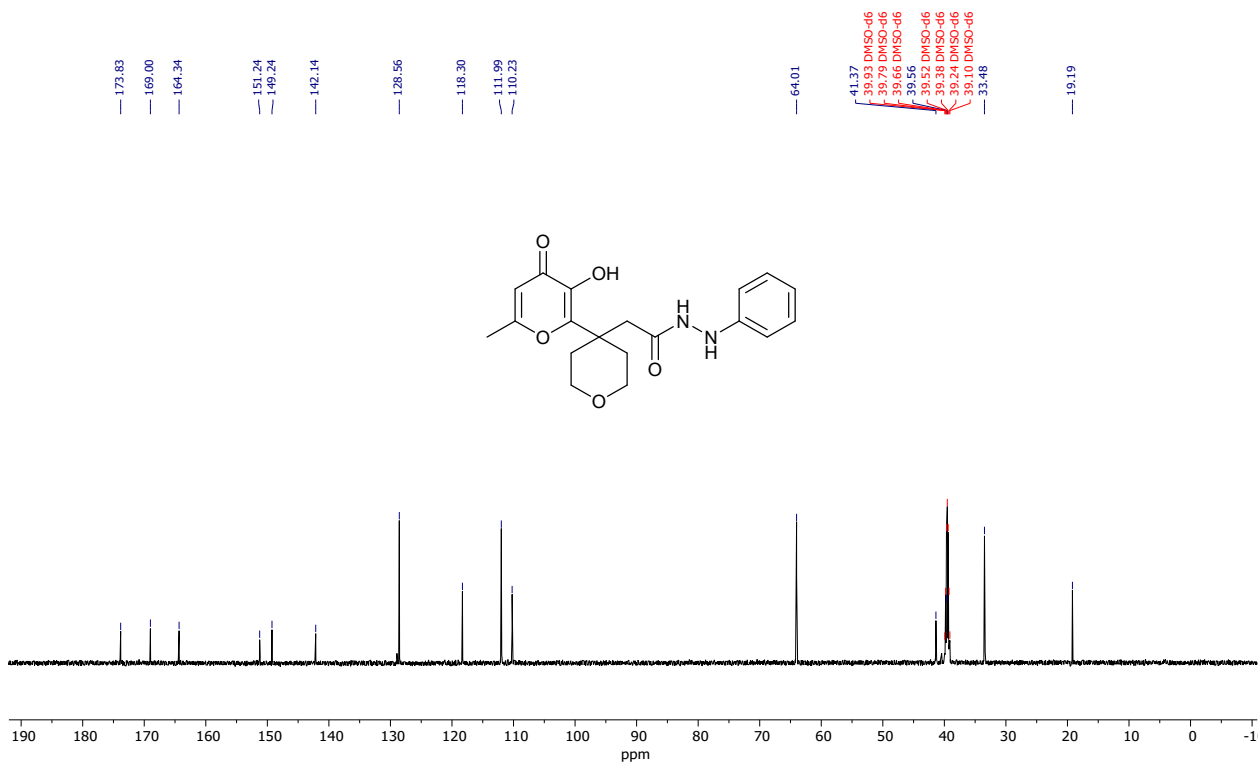



$^1\text{H}$  NMR spectrum (300 MHz) of **7i** in  $\text{DMSO-}d_6$

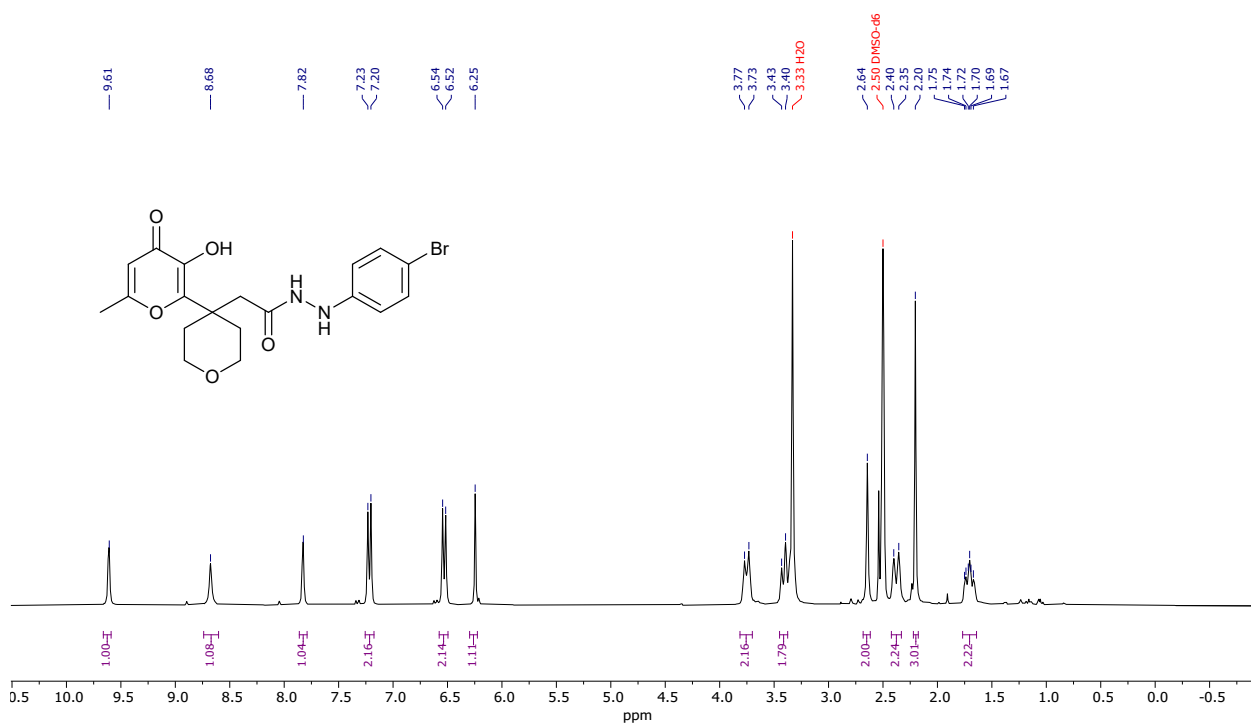

$^{13}\text{C}$   $\{^1\text{H}\}$  NMR spectrum (151 MHz) of **7i** in  $\text{DMSO-}d_6$

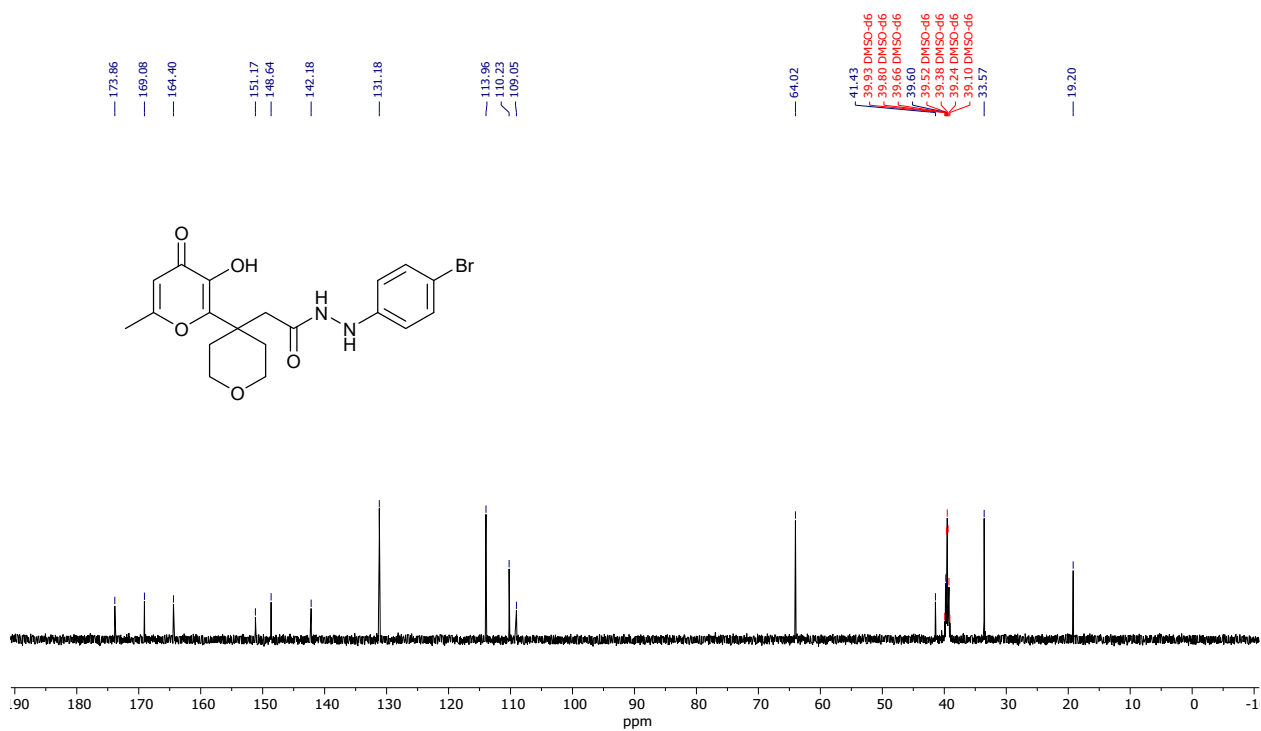



$^1\text{H}$  NMR spectrum (300 MHz) of **7j** in  $\text{DMSO-}d_6$

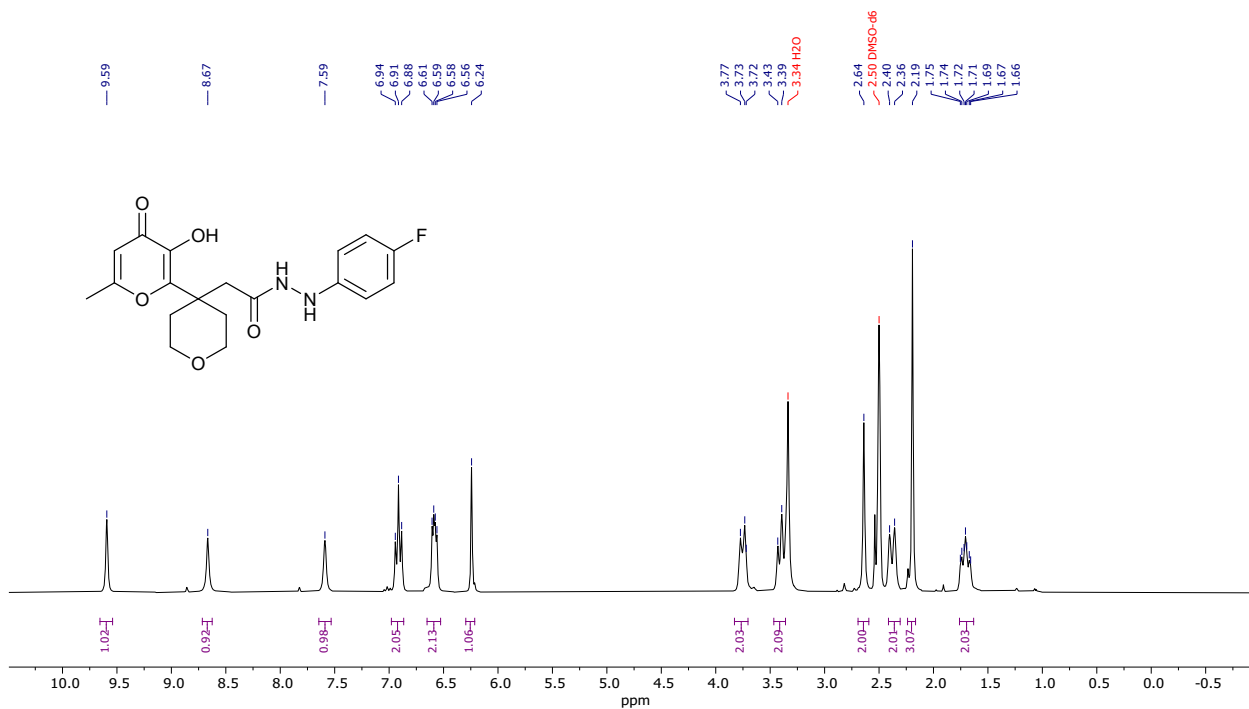

$^{13}\text{C}$   $\{^1\text{H}\}$  NMR spectrum (151 MHz) of **7j** in  $\text{DMSO-}d_6$

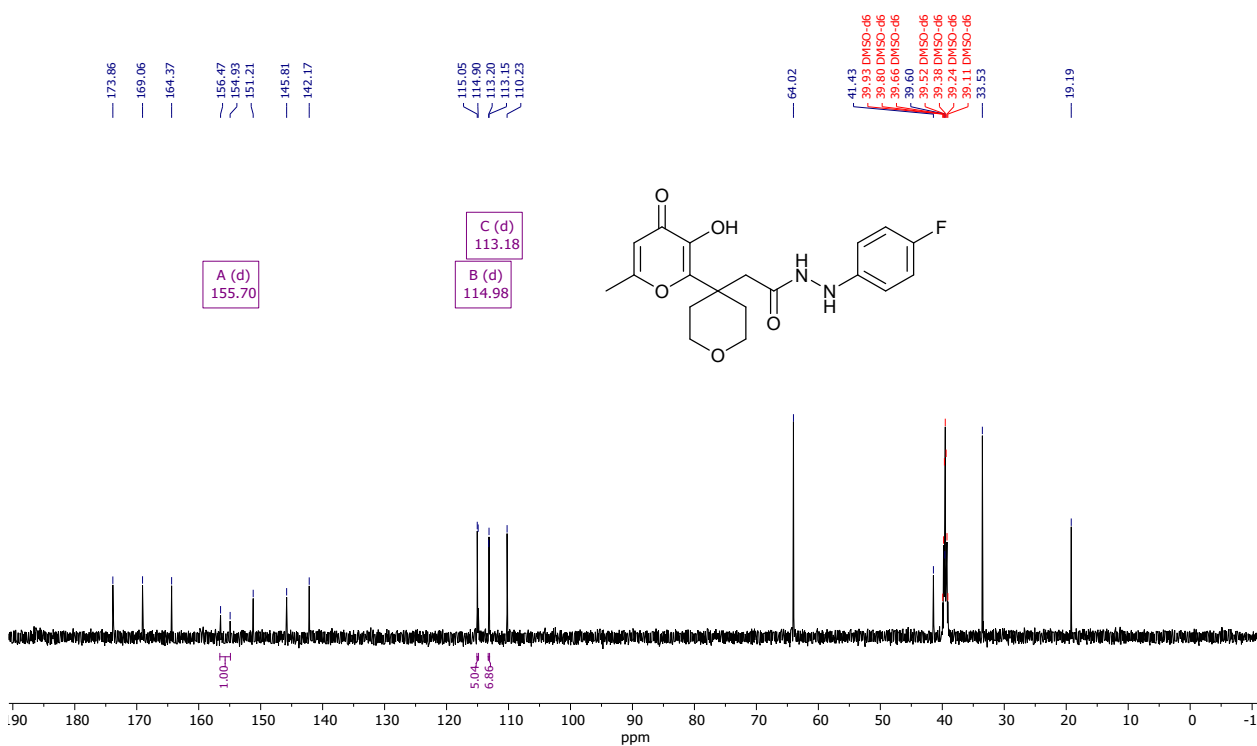

$^1\text{H}$  NMR spectrum (300 MHz) of **7k** in  $\text{DMSO-}d_6$

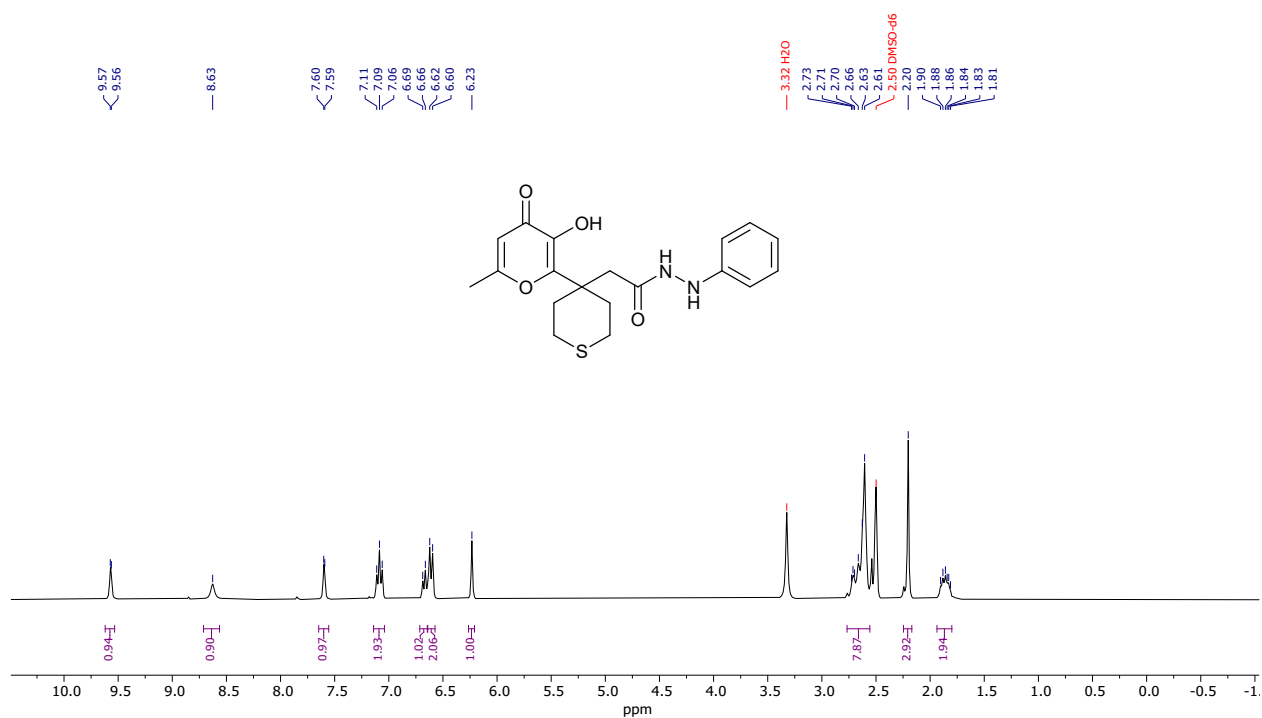

$^{13}\text{C}$   $\{^1\text{H}\}$  NMR spectrum (75 MHz) of **7k** in  $\text{DMSO-}d_6$

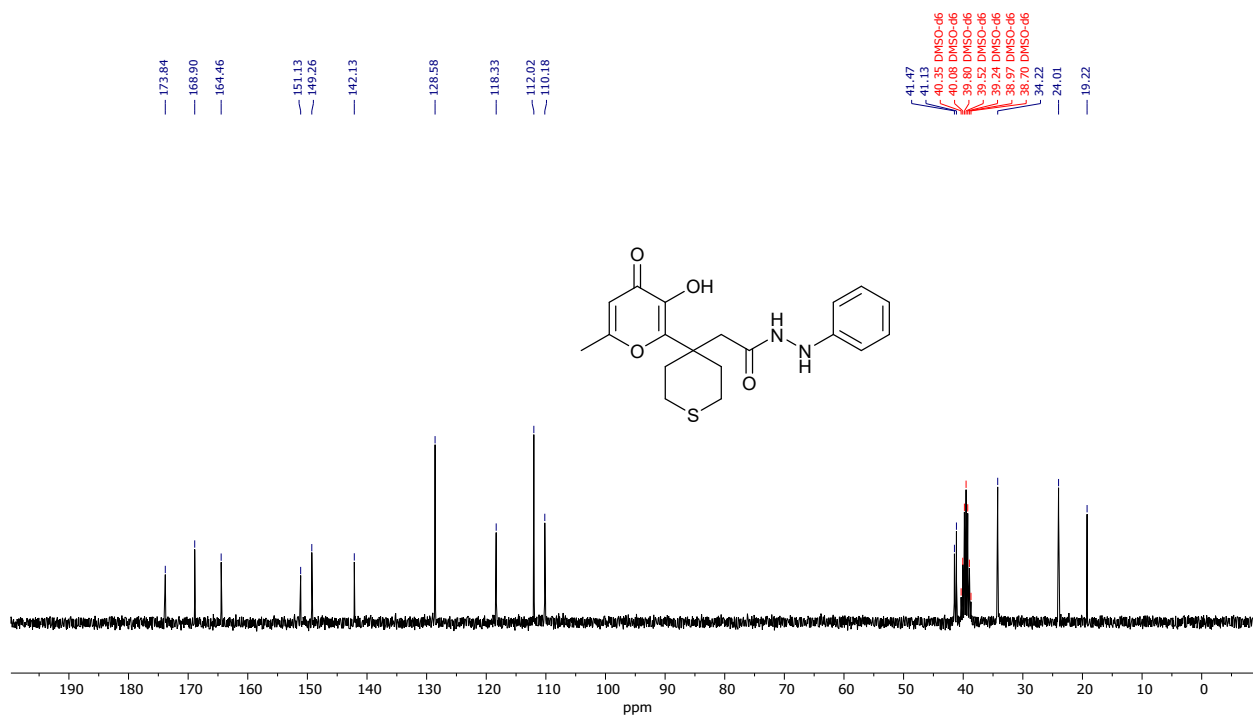

$^1\text{H}$  NMR spectrum (300 MHz) of **7I** in  $\text{DMSO-}d_6$

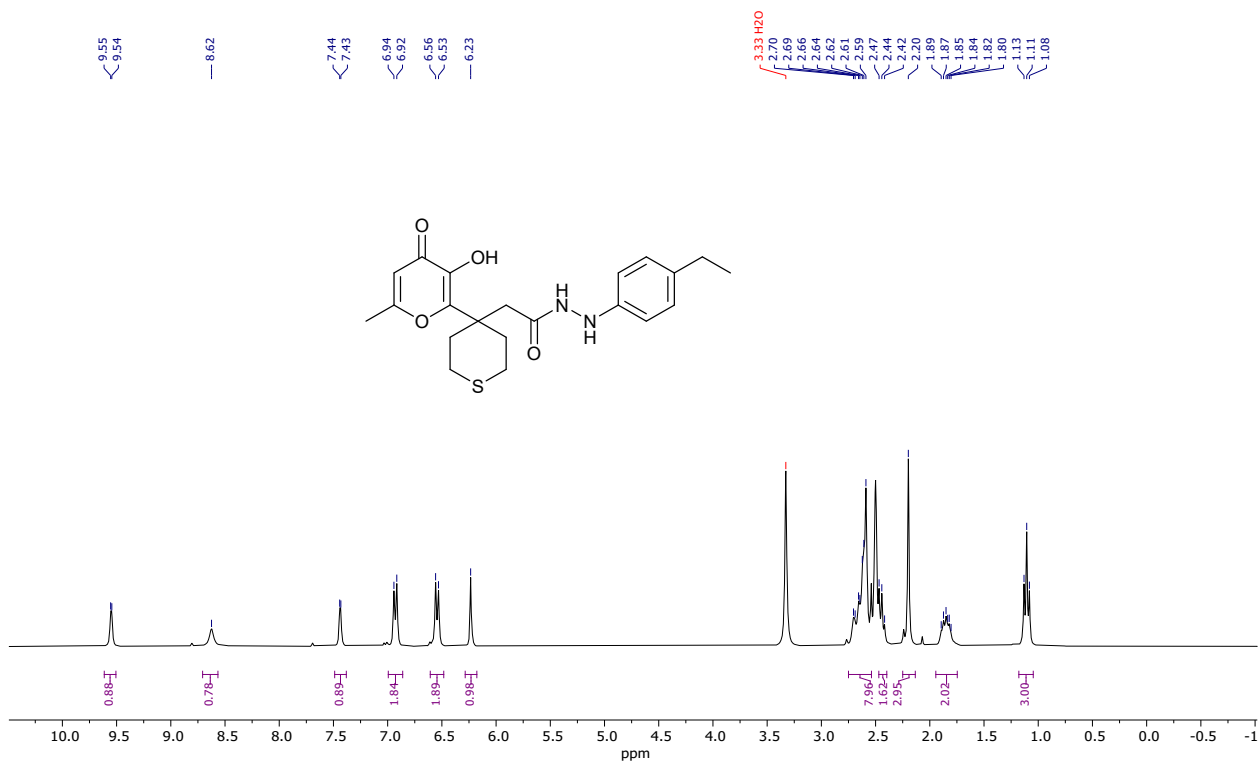

$^{13}\text{C}$   $\{^1\text{H}\}$  NMR spectrum (126 MHz) of **7I** in  $\text{DMSO-}d_6$

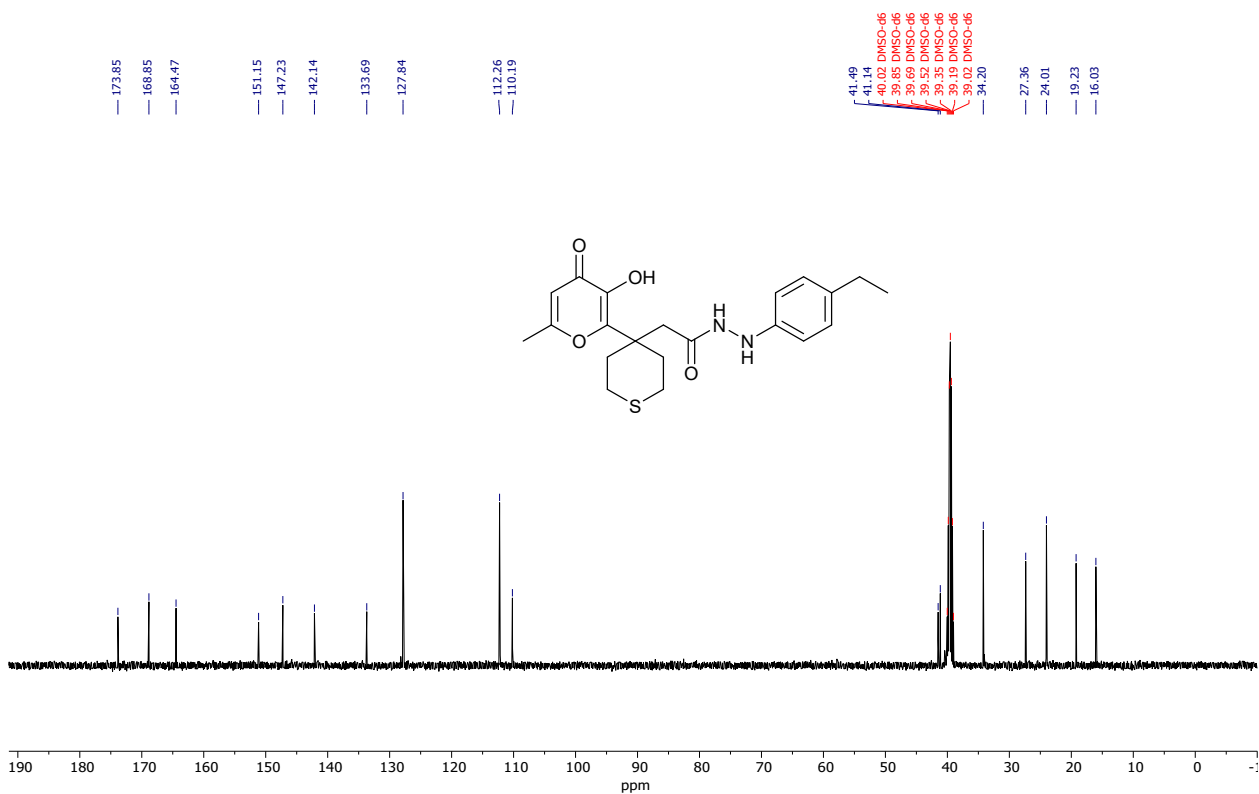



$^1\text{H}$  NMR spectrum (300 MHz) of **7m** in  $\text{DMSO-}d_6$

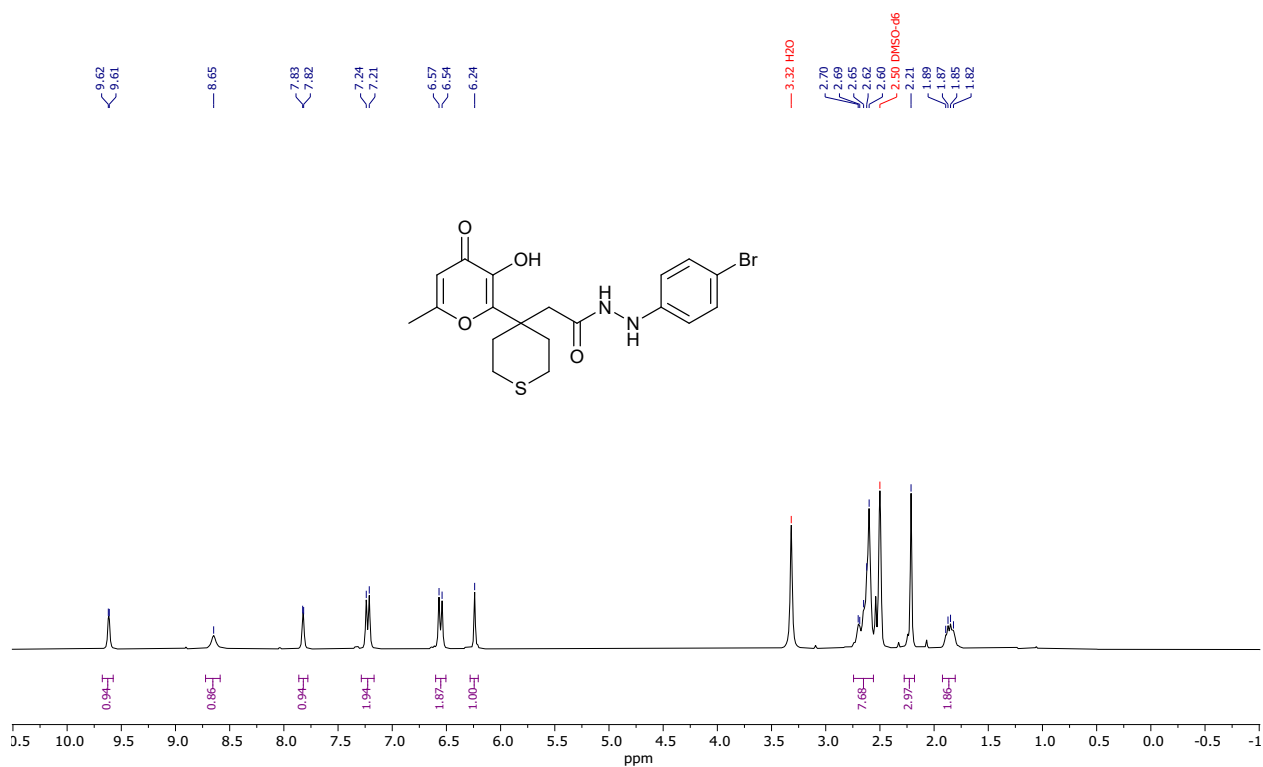

$^{13}\text{C}$   $\{^1\text{H}\}$  NMR spectrum (75 MHz) of **7m** in  $\text{DMSO-}d_6$

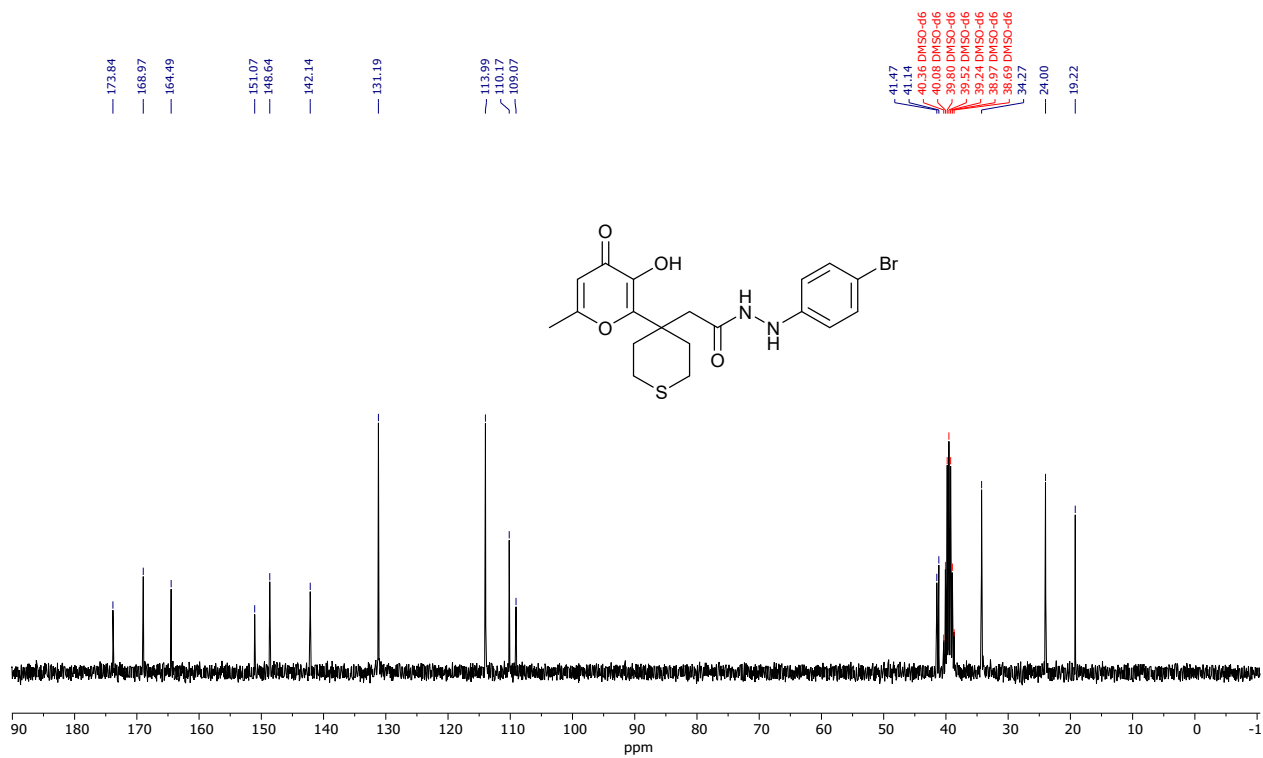

$^1\text{H}$  NMR spectrum (300 MHz) of **7n** in  $\text{DMSO-}d_6$

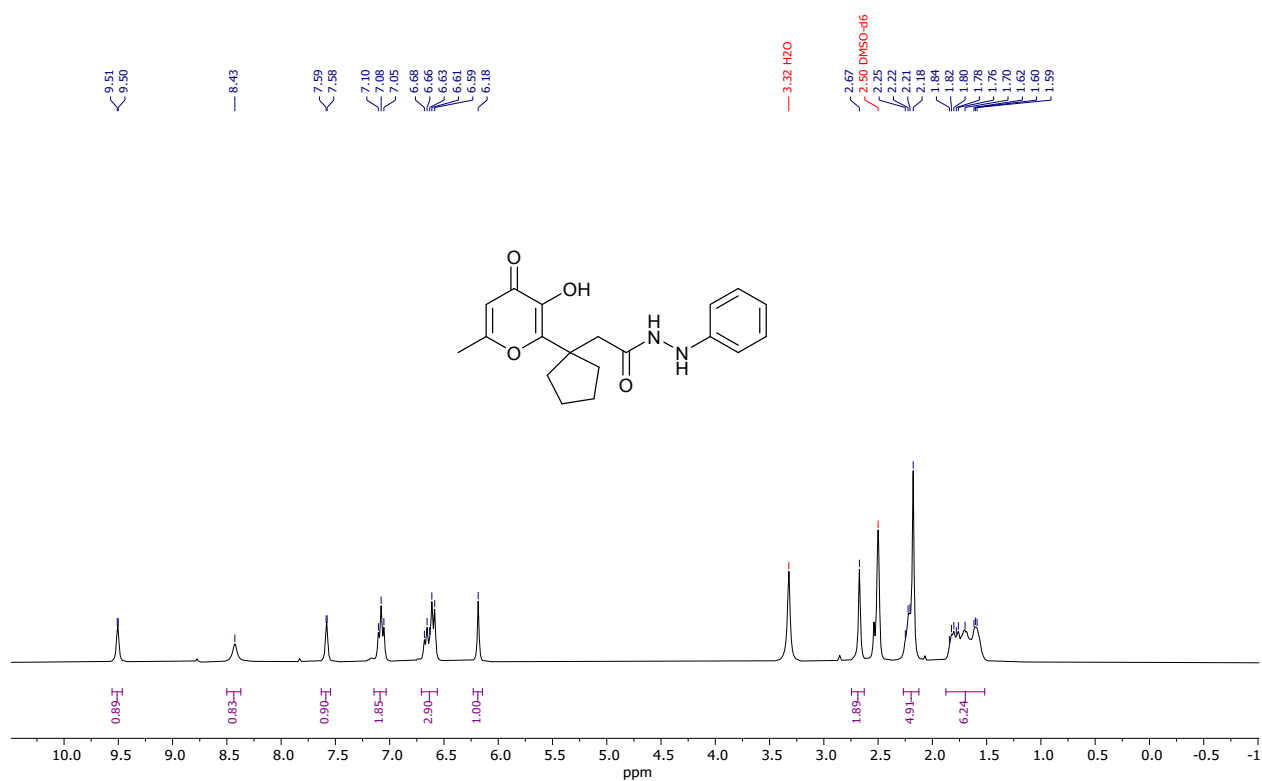

$^{13}\text{C}$   $\{^1\text{H}\}$  NMR spectrum (75 MHz) of **7n** in  $\text{DMSO-}d_6$

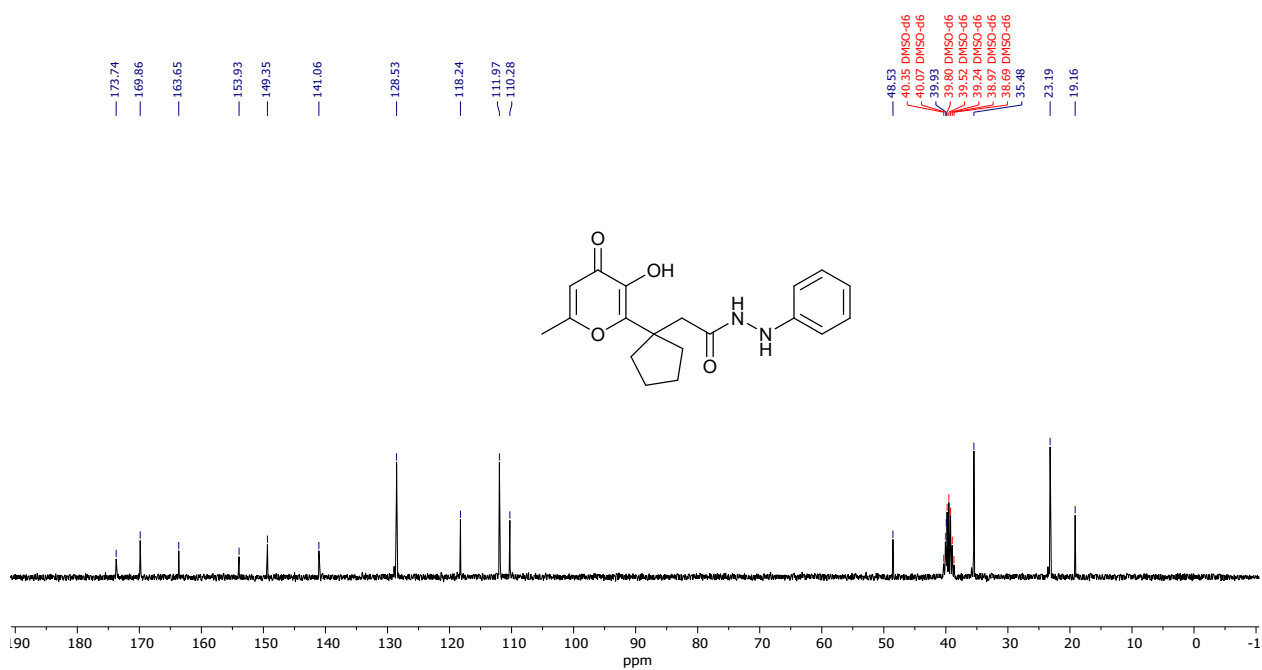

$^1\text{H}$  NMR spectrum (300 MHz) of **7o** in  $\text{DMSO-}d_6$

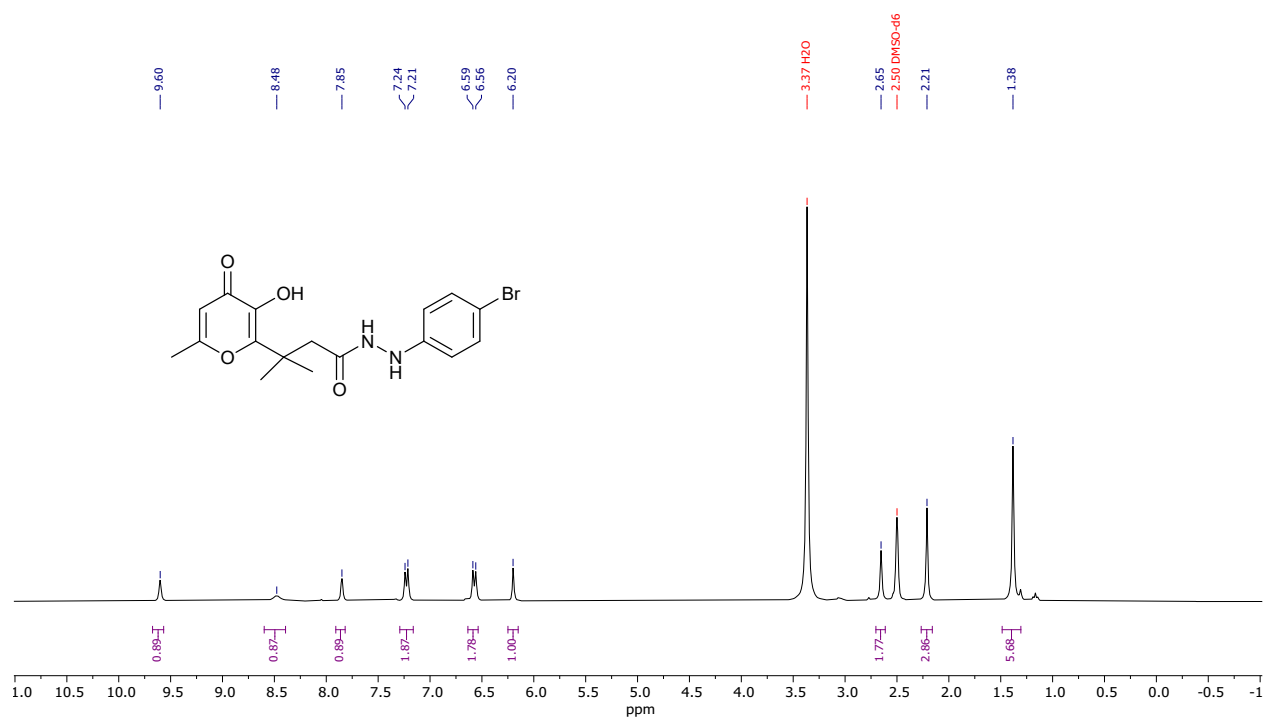

$^{13}\text{C}$   $\{^1\text{H}\}$  NMR spectrum (126 MHz) of **7o** in  $\text{DMSO-}d_6$

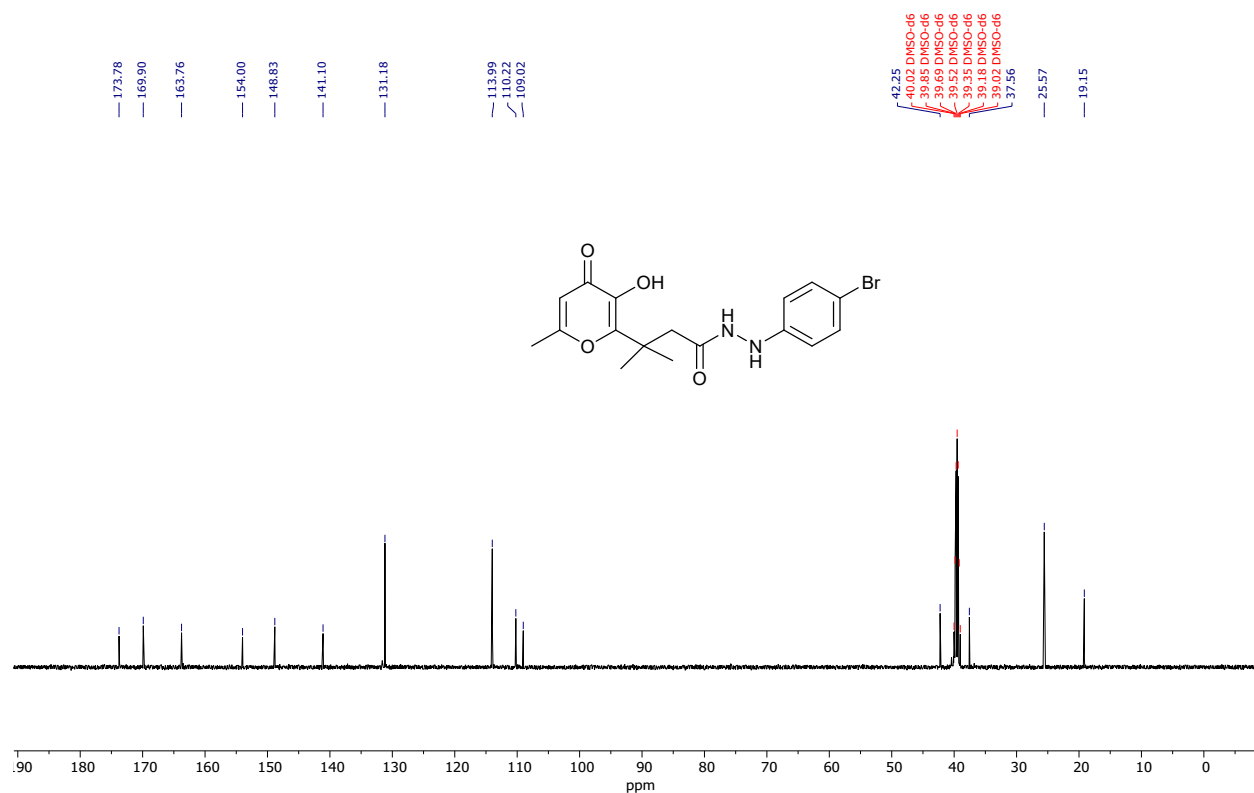

$^1\text{H}$  NMR spectrum (300 MHz) of **7p** in  $\text{DMSO-}d_6$

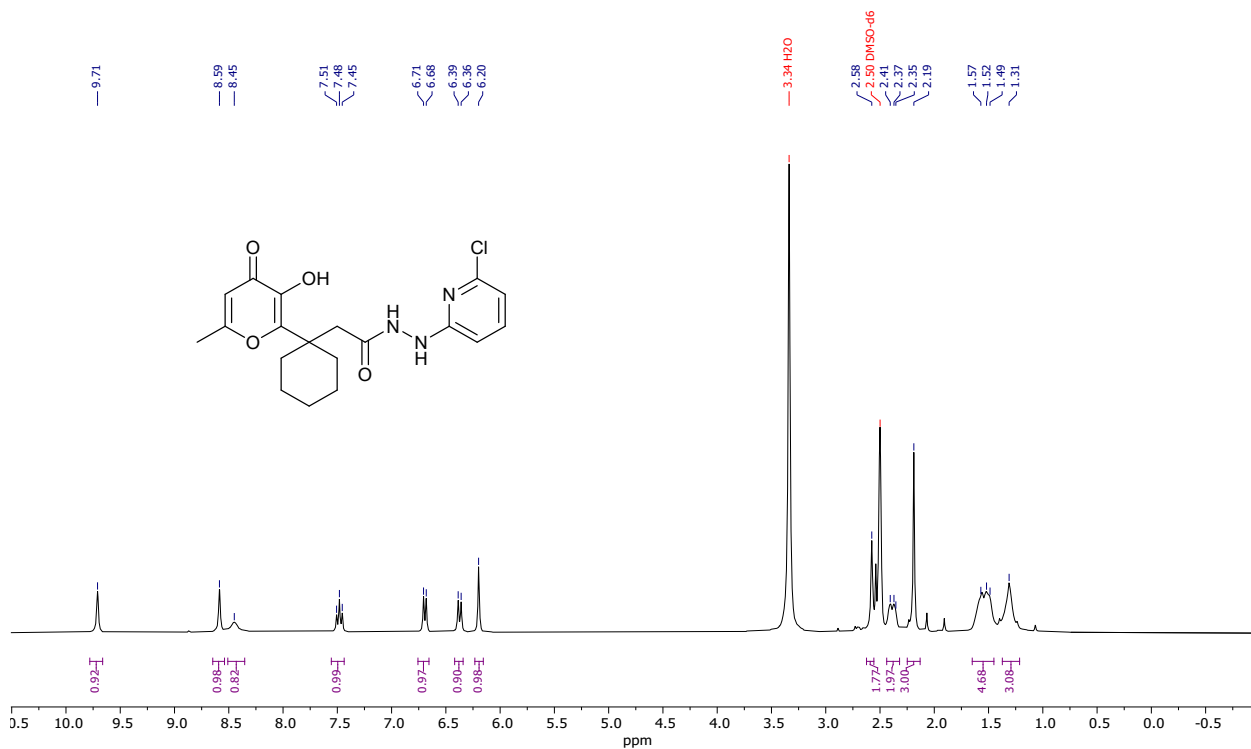

$^{13}\text{C}$   $\{^1\text{H}\}$  NMR spectrum (126 MHz) of **7p** in  $\text{DMSO-}d_6$

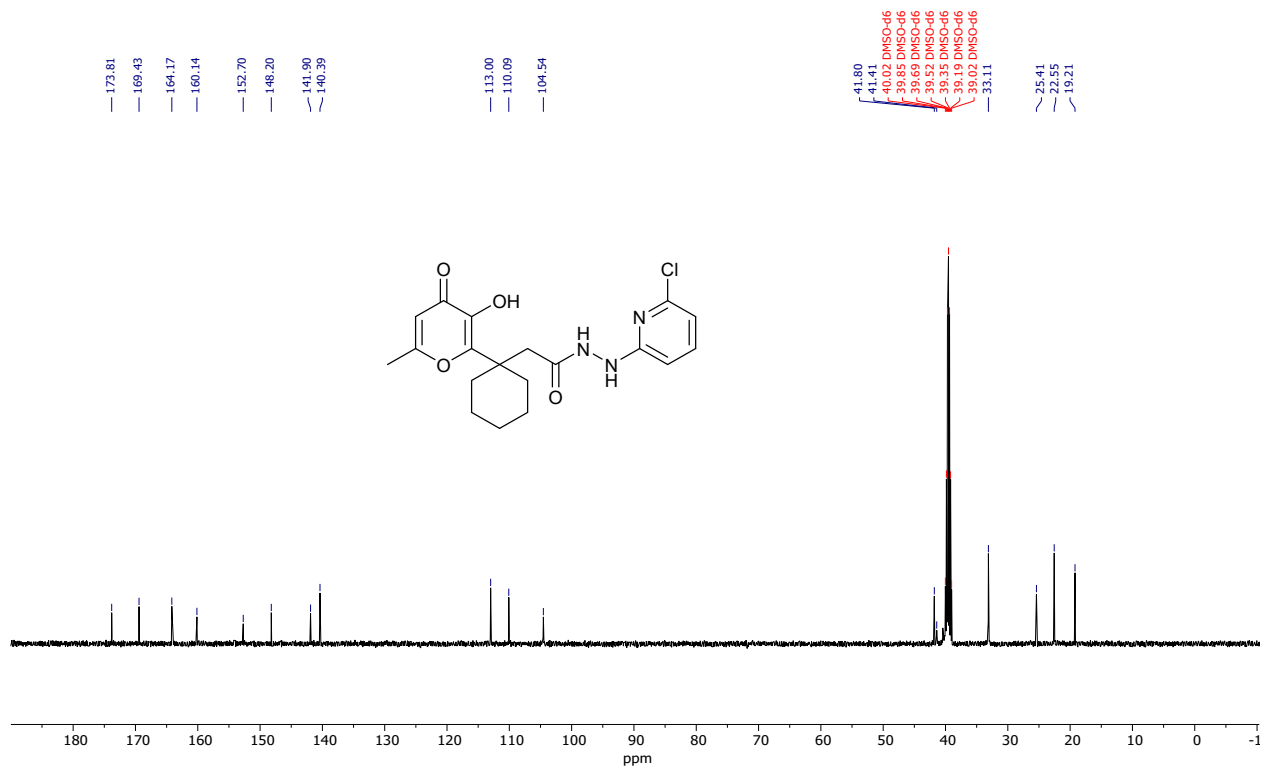





$^1\text{H}$  NMR spectrum (300 MHz) of **7q** in  $\text{DMSO-}d_6$

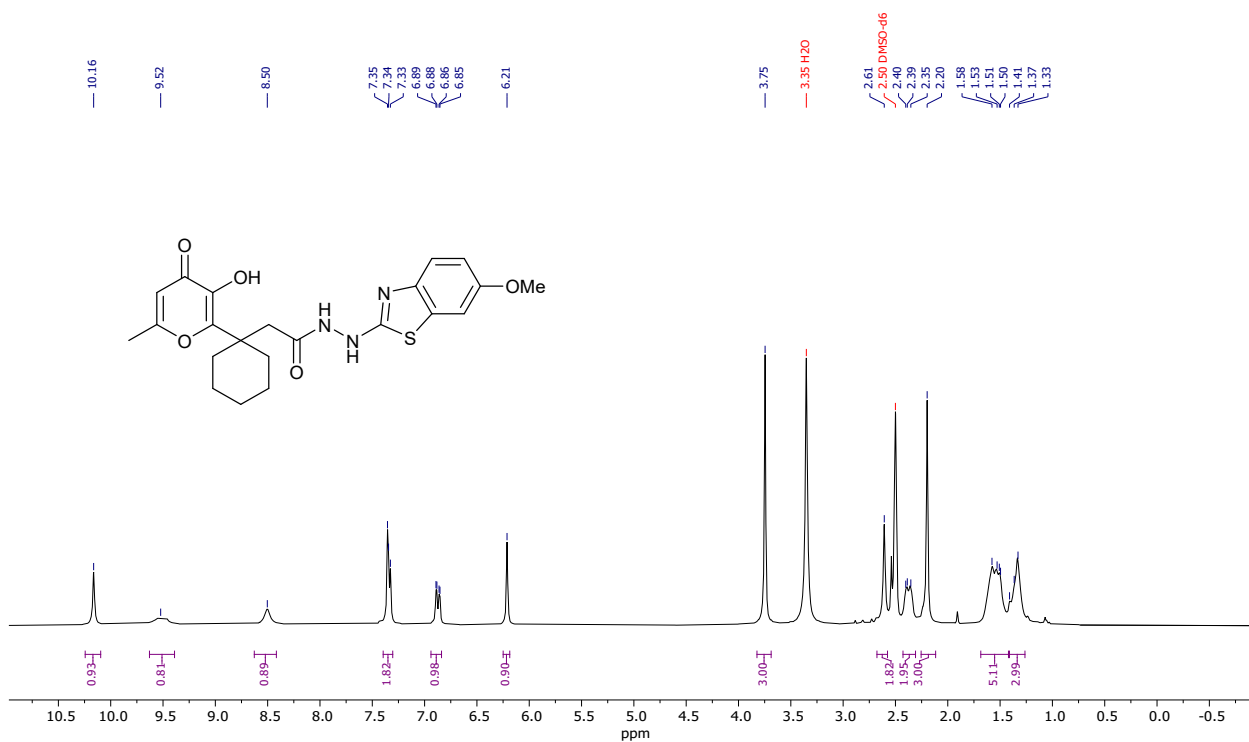

$^{13}\text{C}$   $\{^1\text{H}\}$  NMR spectrum (75 MHz) of **7q** in  $\text{DMSO-}d_6$

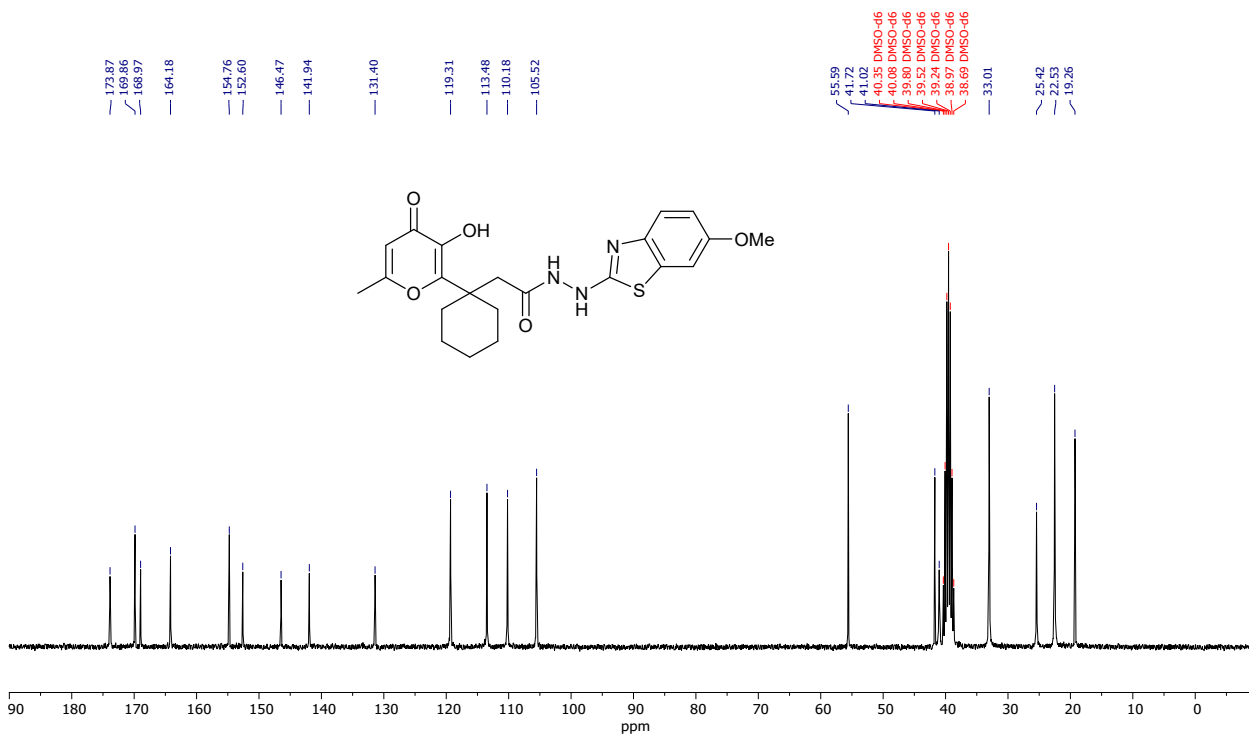

$^1\text{H}$  NMR spectrum (300 MHz) of **7r** in  $\text{DMSO-}d_6$

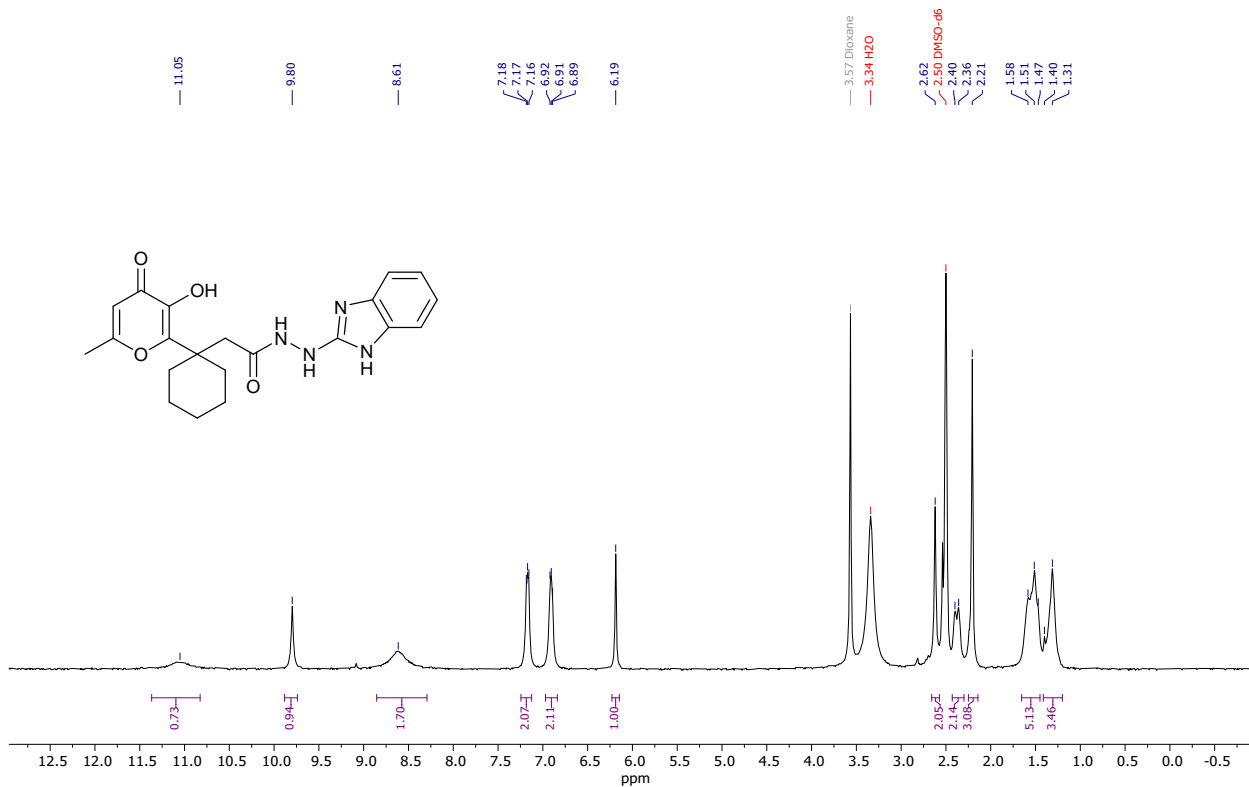

$^{13}\text{C}$   $\{^1\text{H}\}$  NMR spectrum (126 MHz) of **7r** in  $\text{DMSO-}d_6$

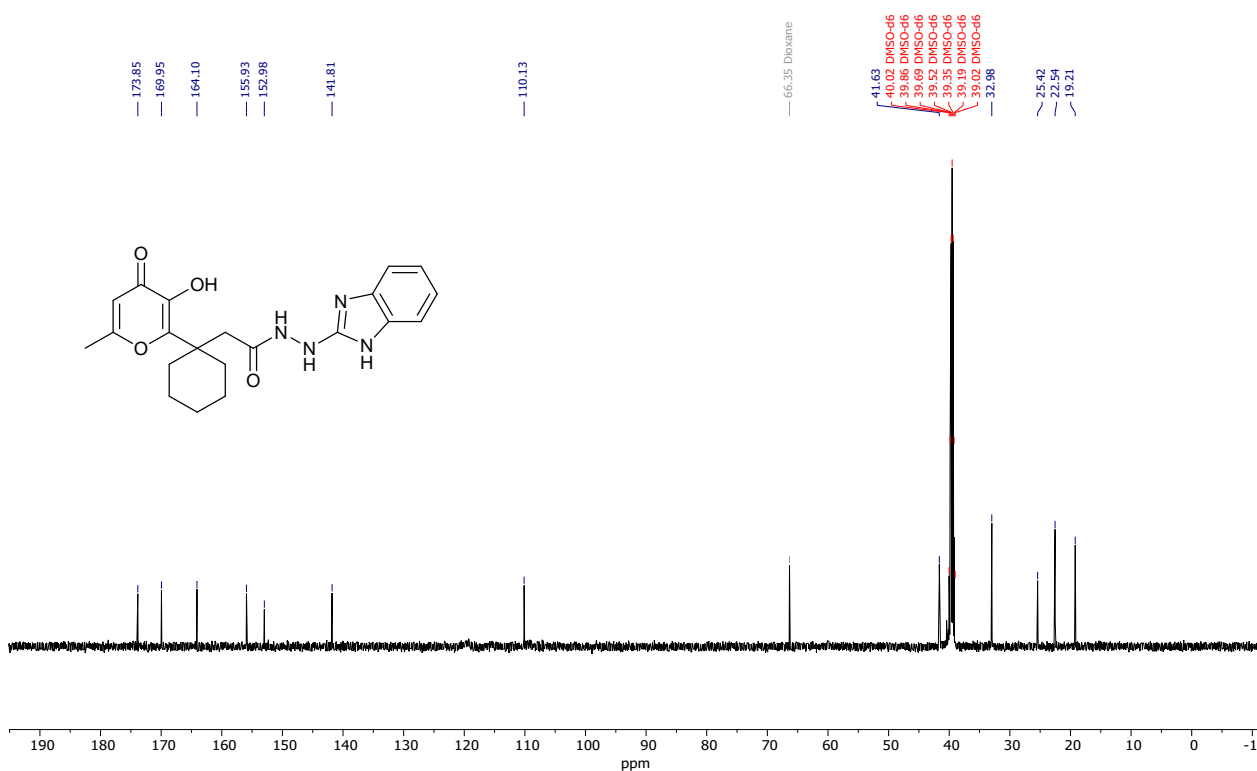



$^1\text{H}$  NMR spectrum (300 MHz) of **9a** in  $\text{DMSO-}d_6$

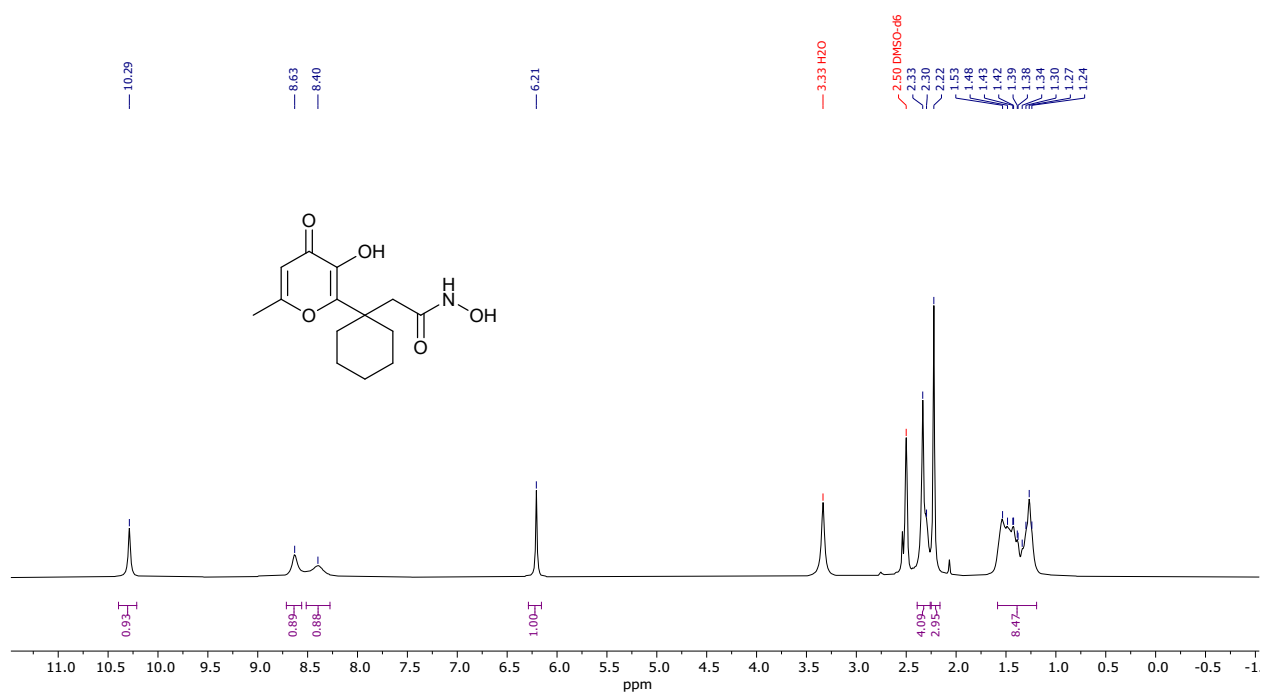

$^{13}\text{C}$   $\{^1\text{H}\}$  NMR spectrum (75 MHz) of **9a** in  $\text{DMSO-}d_6$

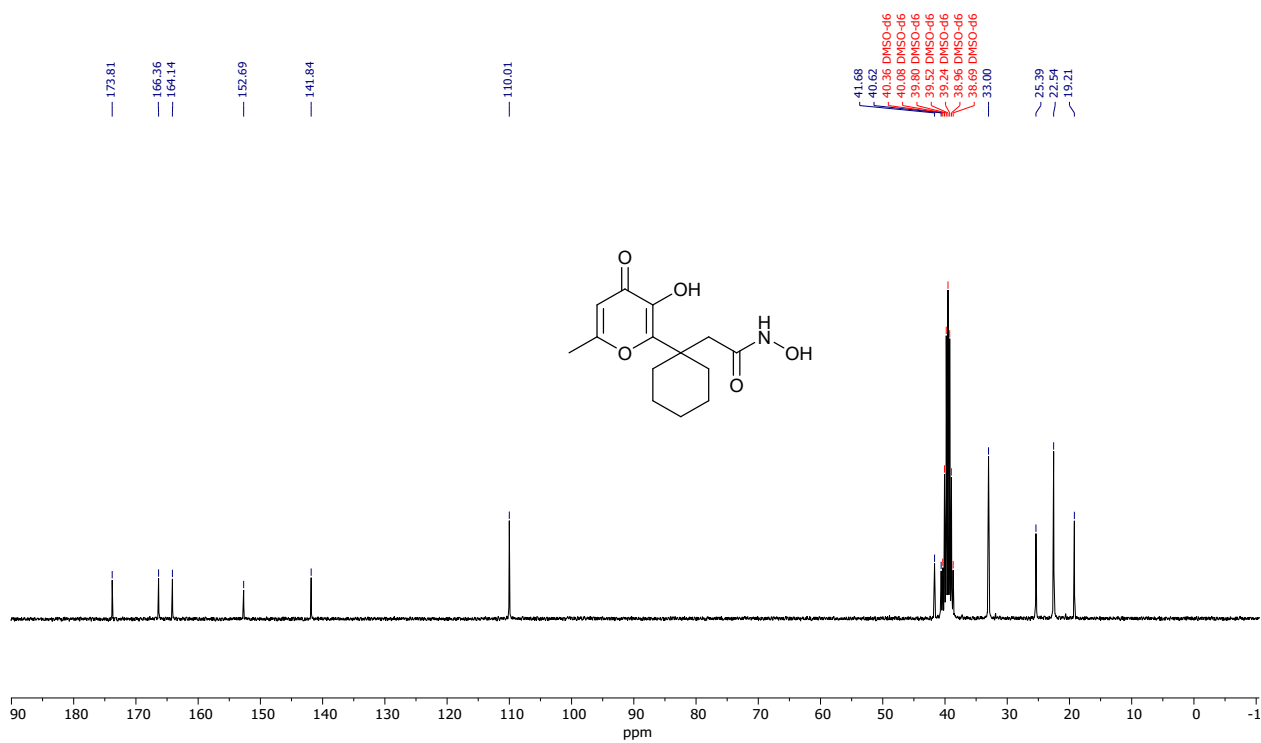

$^1\text{H}$  NMR spectrum (300 MHz) of **9b** in  $\text{DMSO-}d_6$

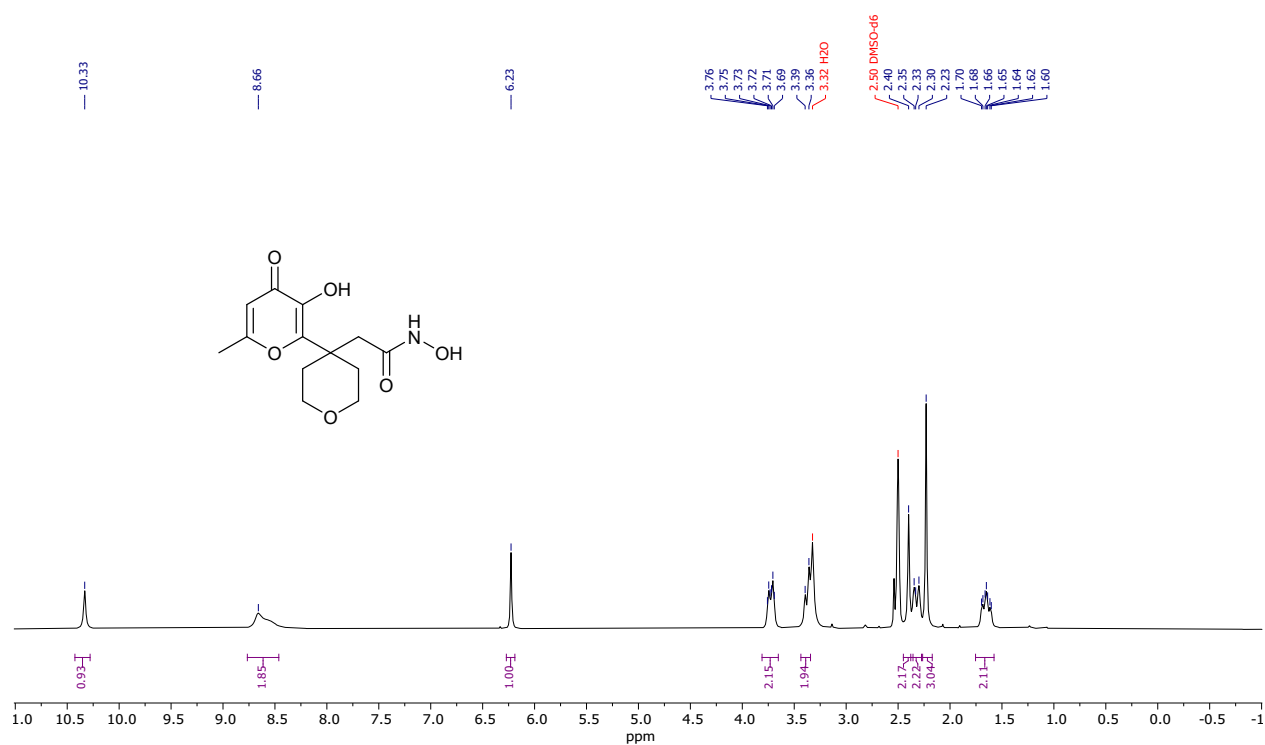

$^{13}\text{C}$   $\{^1\text{H}\}$  NMR spectrum (75 MHz) of **9b** in  $\text{DMSO-}d_6$

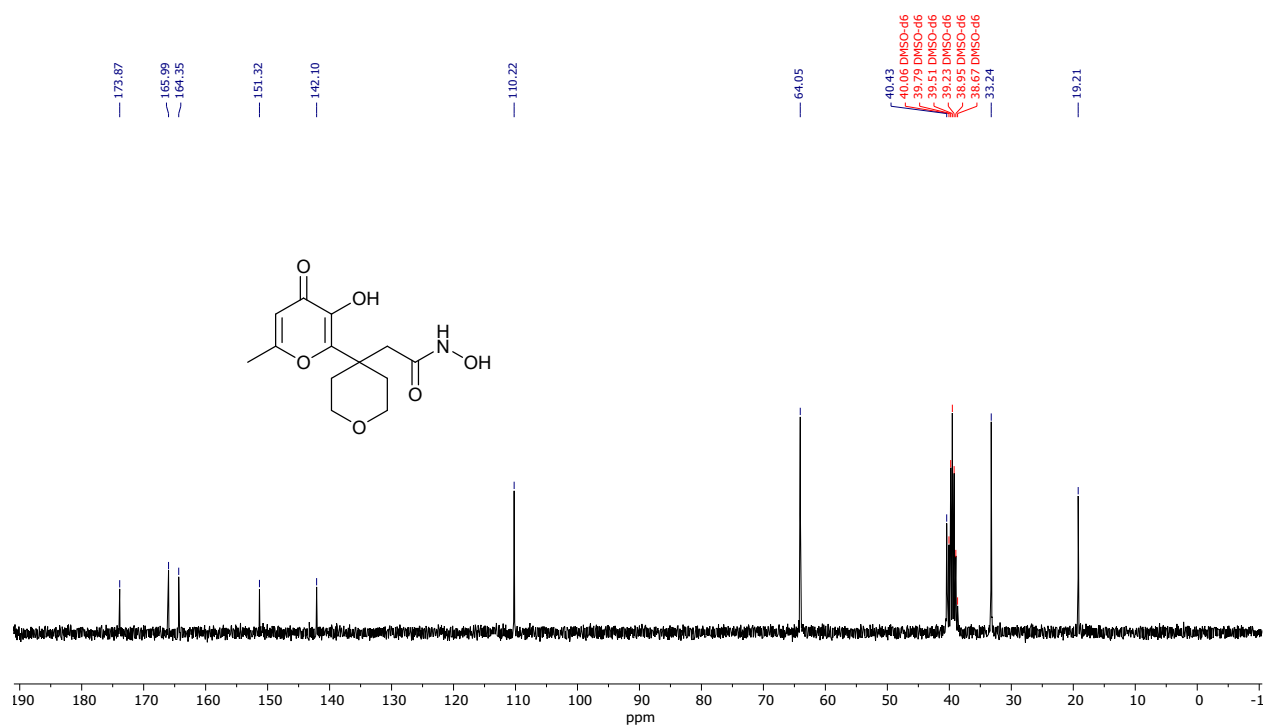

$^1\text{H}$  NMR spectrum (300 MHz) of **9c** in  $\text{DMSO-}d_6$

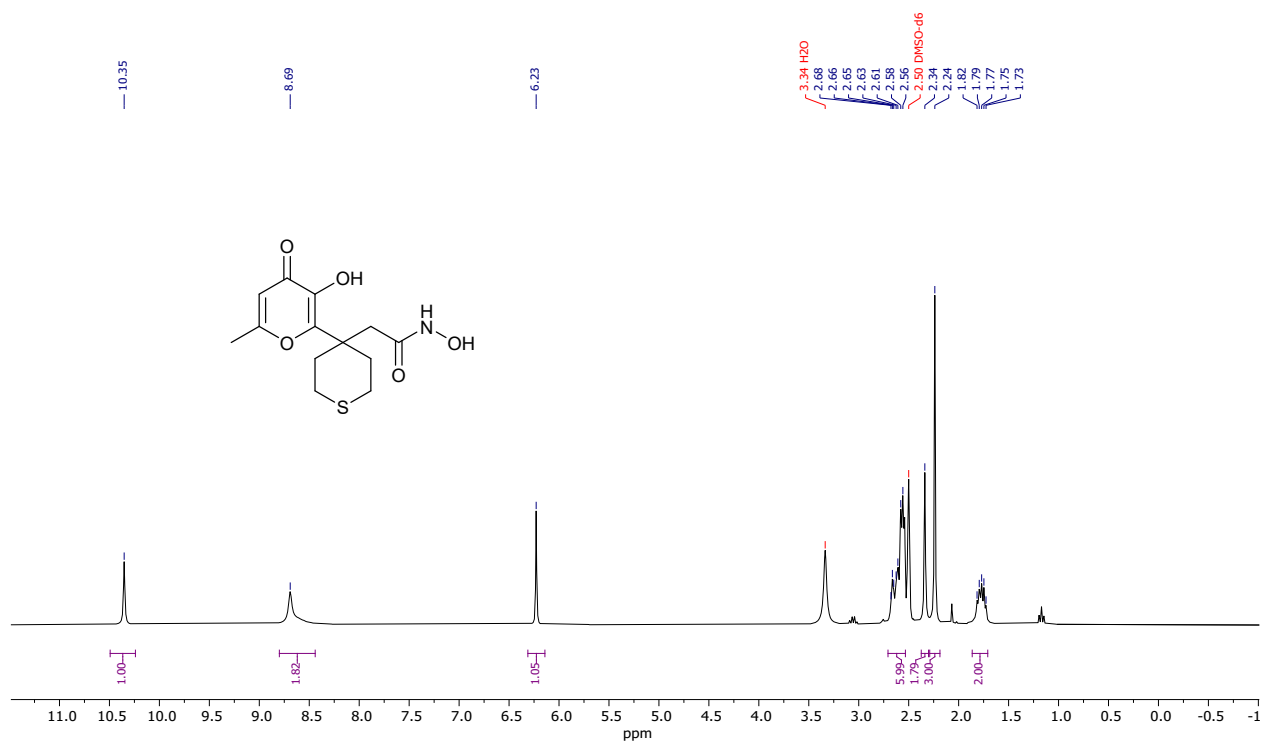

$^{13}\text{C}$   $\{^1\text{H}\}$  NMR spectrum (75 MHz) of **9c** in  $\text{DMSO-}d_6$

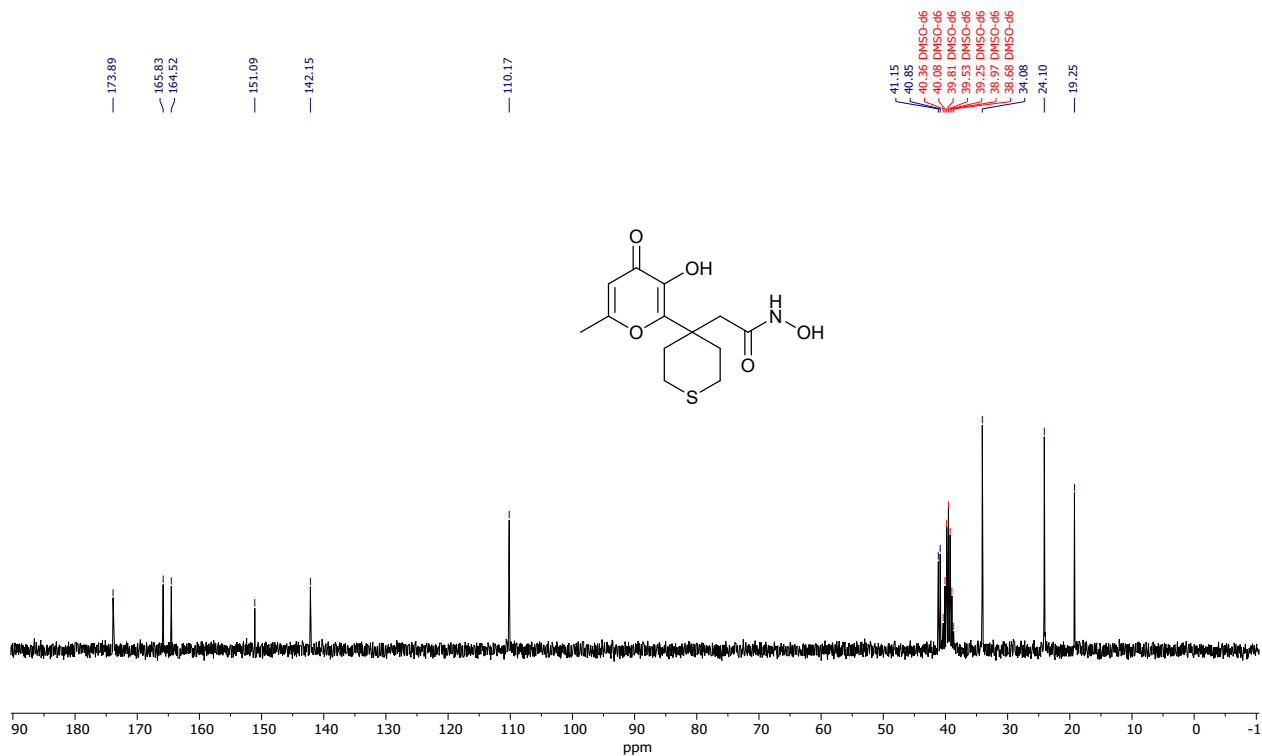

## 6.2 3-Acetyltetronic acids **8**

$^1\text{H}$  NMR spectrum (300 MHz) of **8a** in  $\text{DMSO-}d_6$

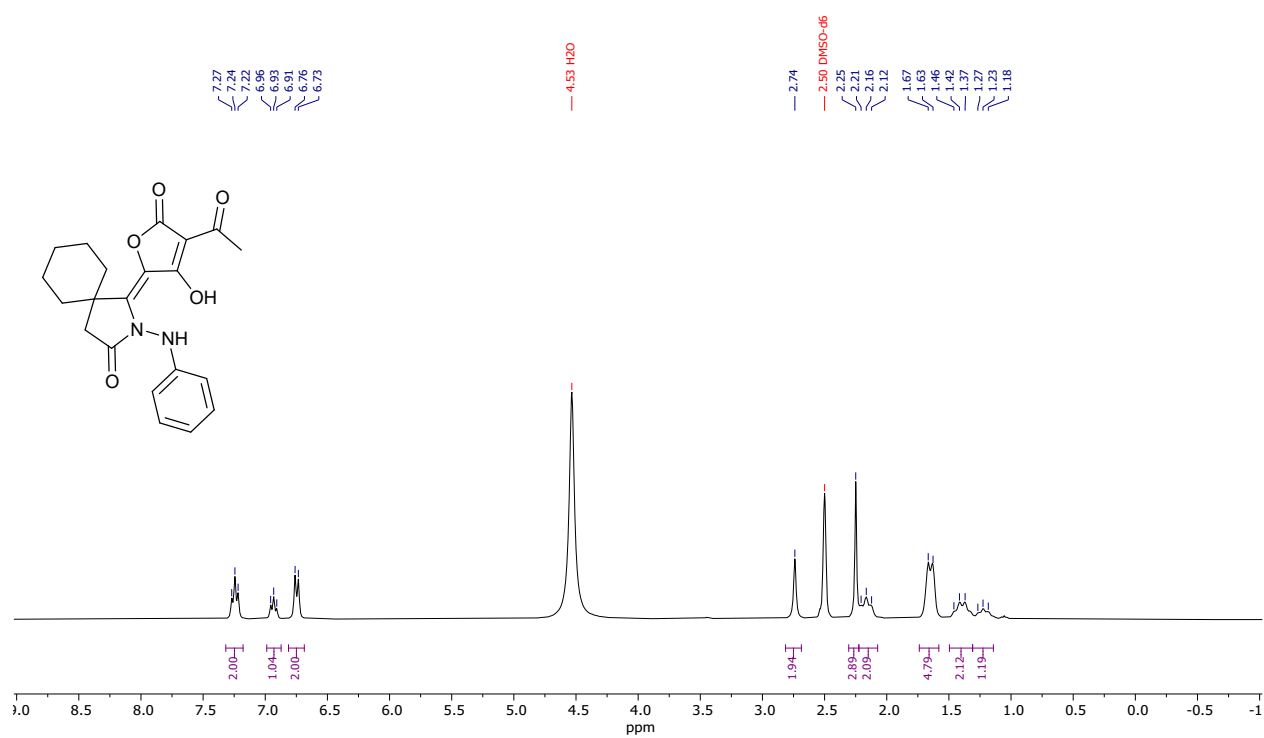

$^{13}\text{C}$   $\{^1\text{H}\}$  NMR spectrum (75 MHz) of **8a** in  $\text{DMSO-}d_6$



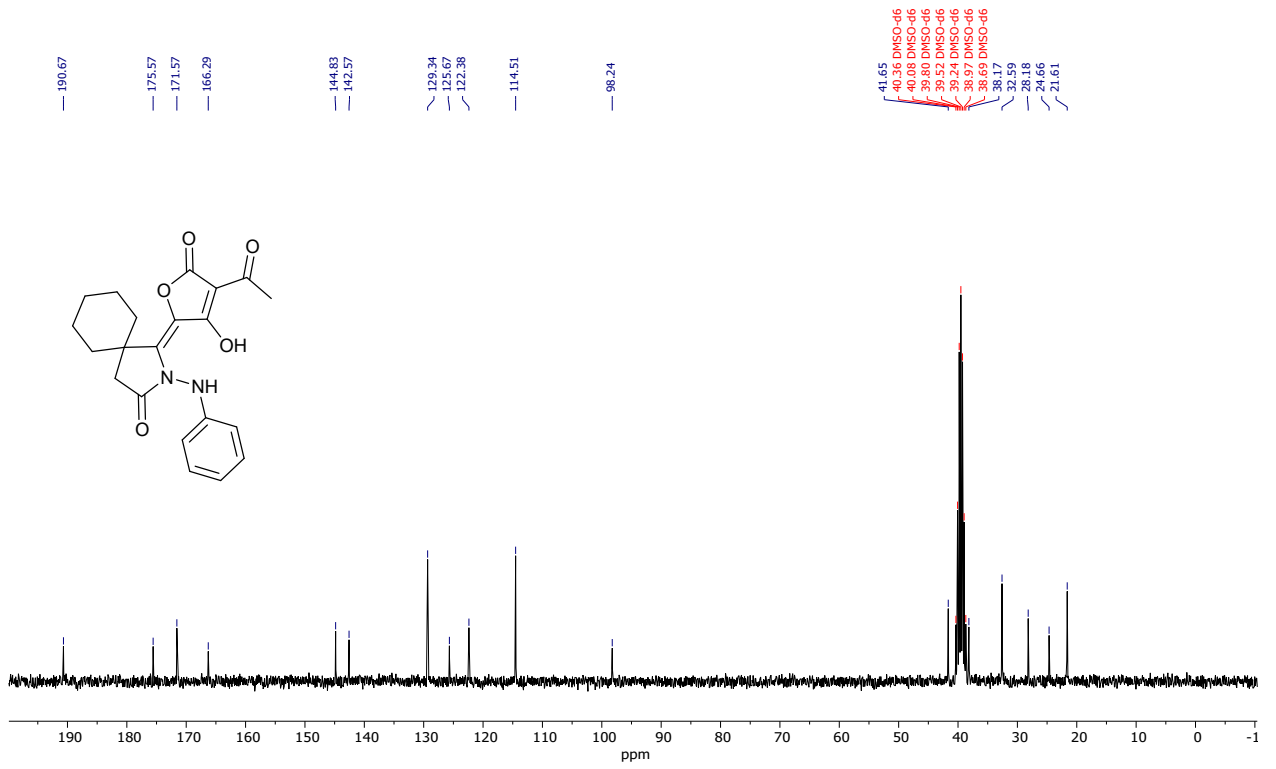

$^1\text{H}$  NMR spectrum (300 MHz) of **8b** in  $\text{DMSO-}d_6$

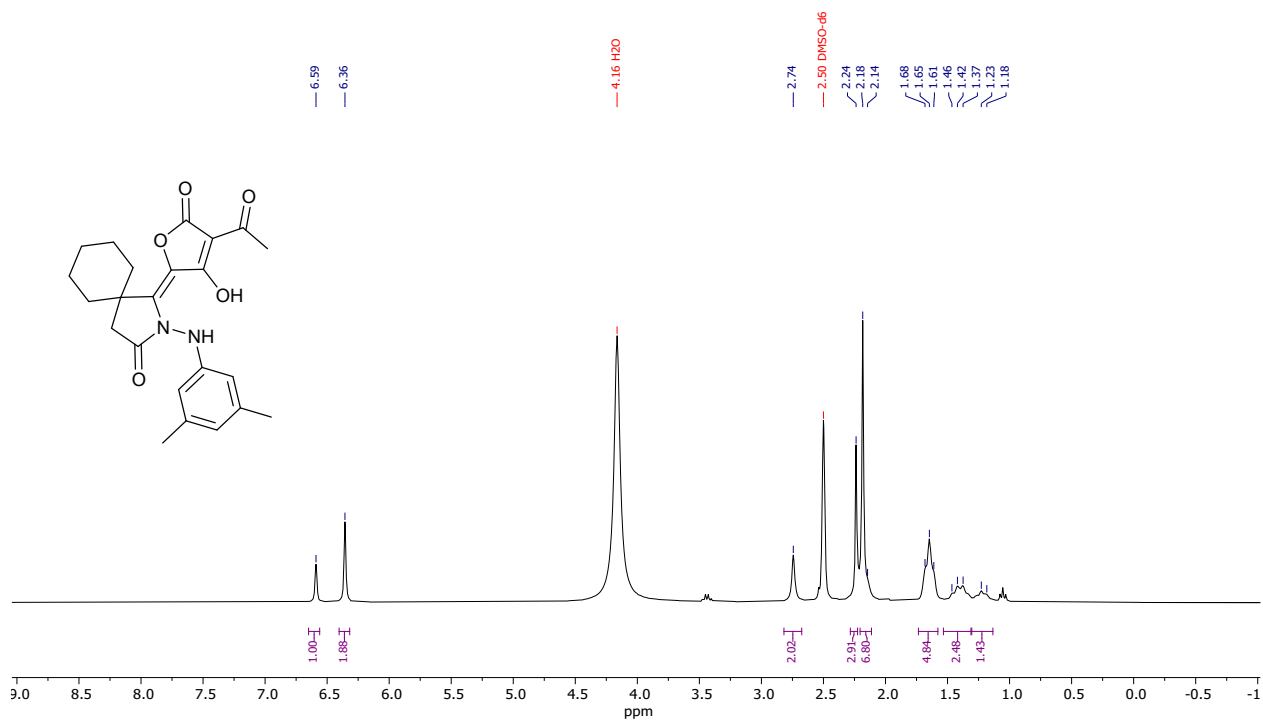

$^{13}\text{C}$   $\{^1\text{H}\}$  NMR spectrum (75 MHz) of **8b** in  $\text{DMSO-}d_6$

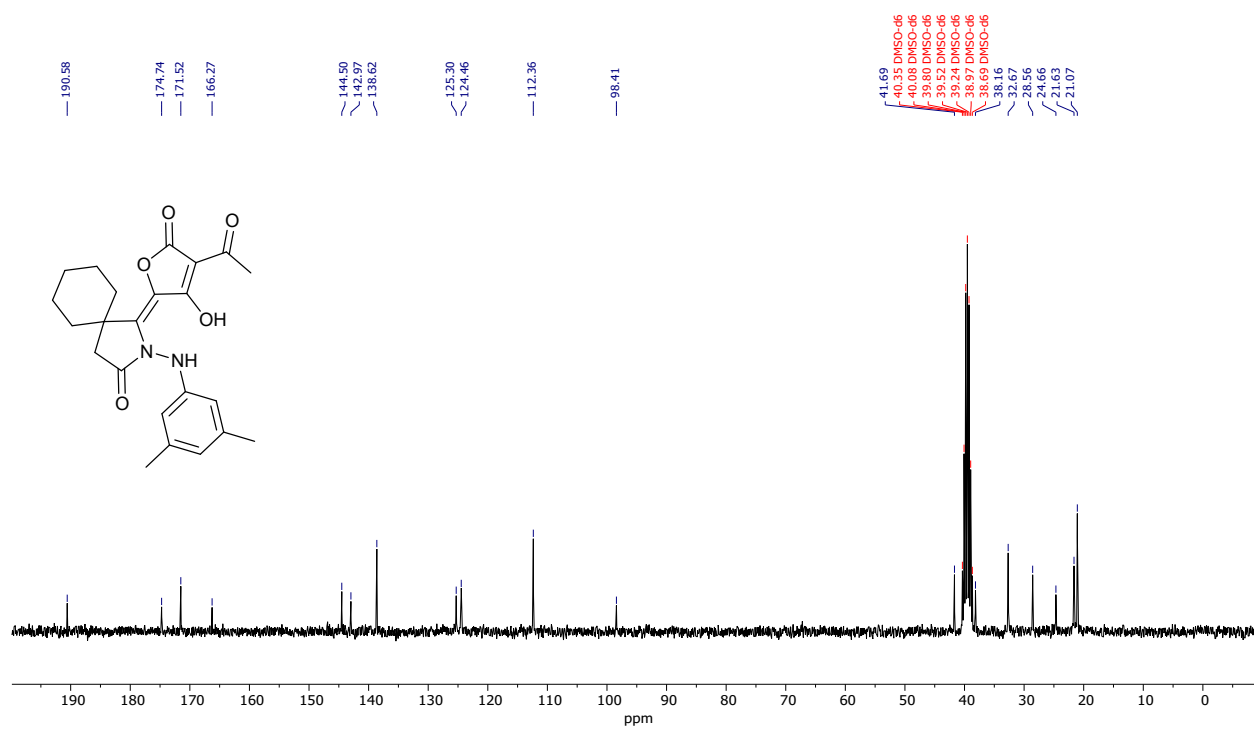



$^1\text{H}$  NMR spectrum (300 MHz) of **8c** in  $\text{DMSO-}d_6$

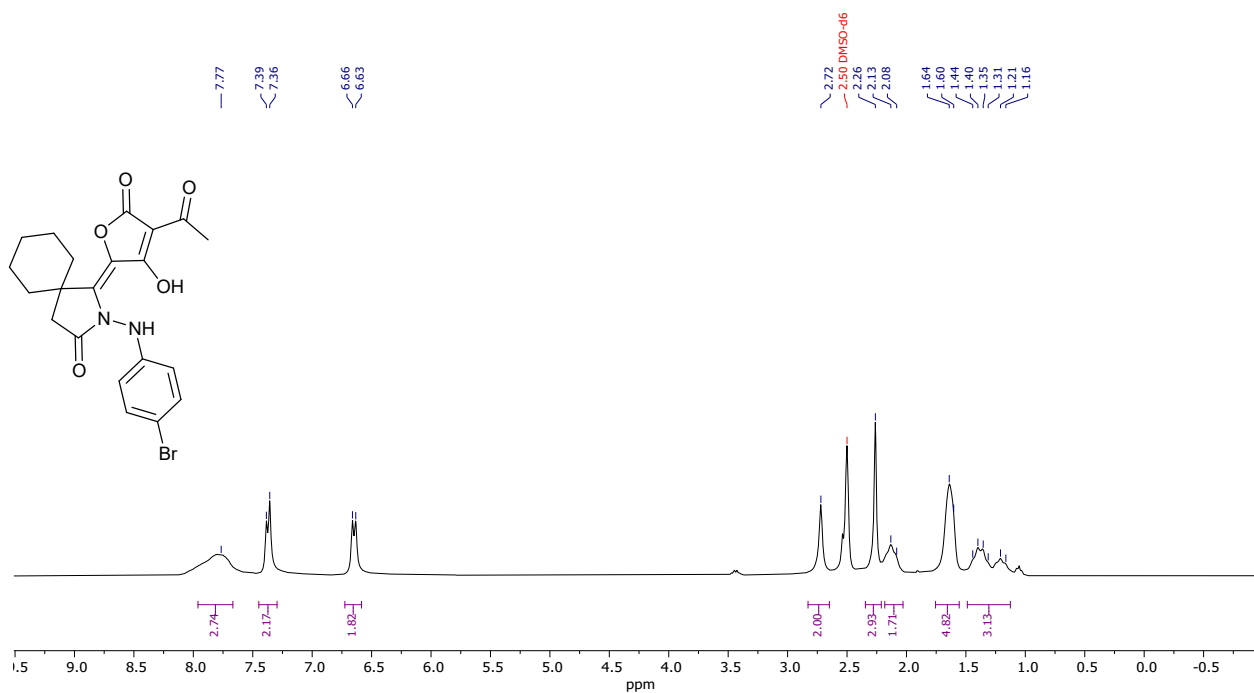

$^{13}\text{C}$   $\{^1\text{H}\}$  NMR spectrum (75 MHz) of **8c** in  $\text{DMSO-}d_6$

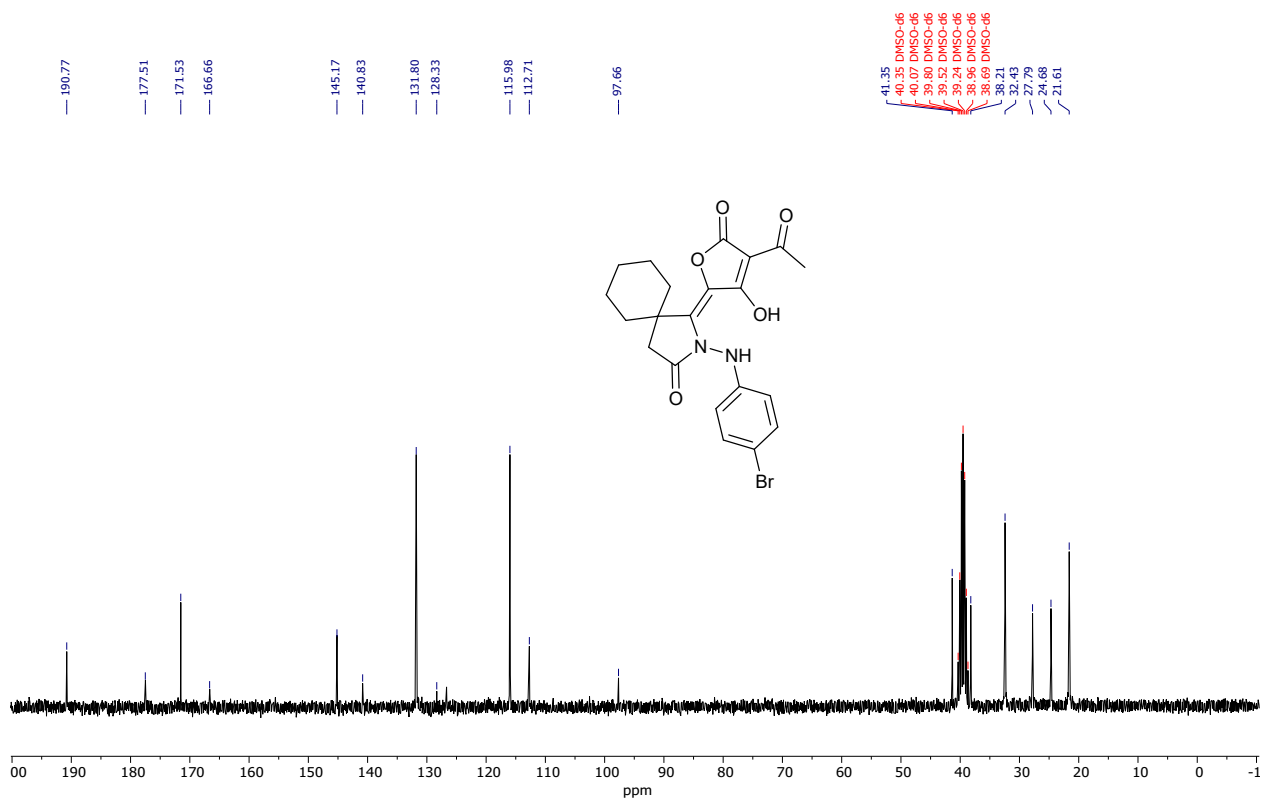

$^1\text{H}$  NMR spectrum (300 MHz) of **8d** in  $\text{DMSO-}d_6$

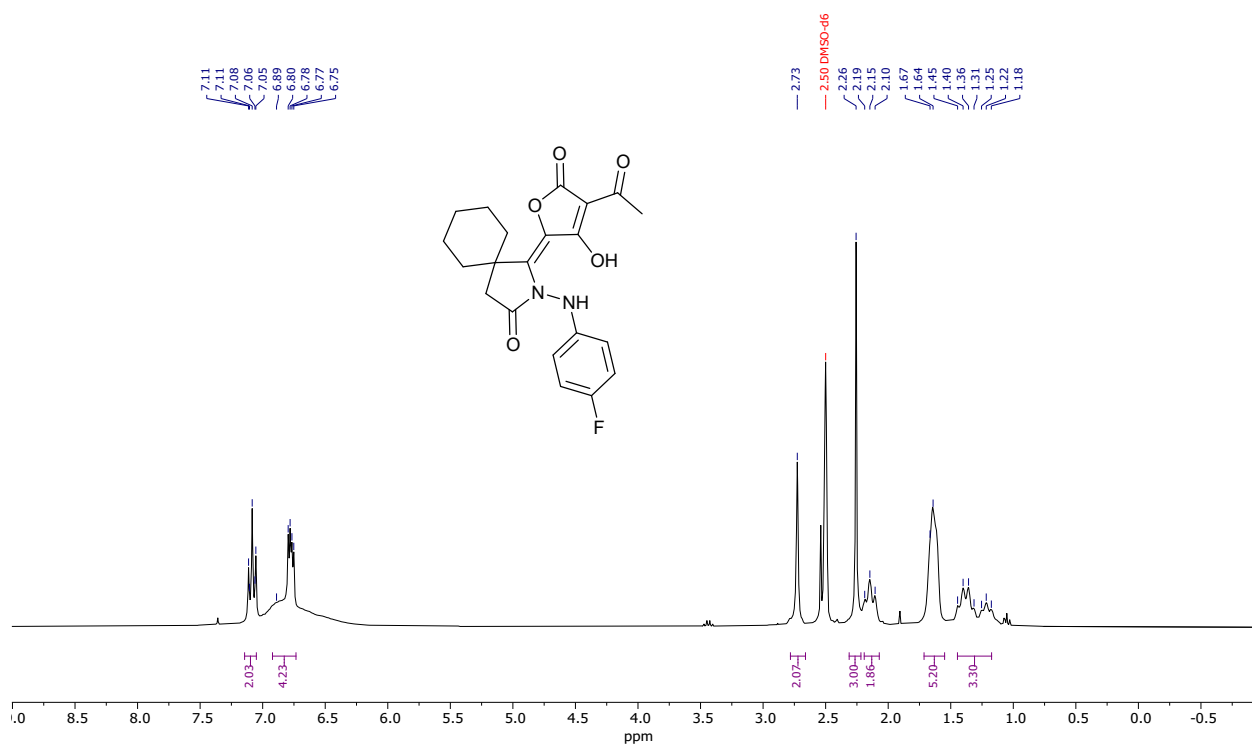

$^{13}\text{C}$   $\{^1\text{H}\}$  NMR spectrum (75 MHz) of **8d** in  $\text{DMSO-}d_6$

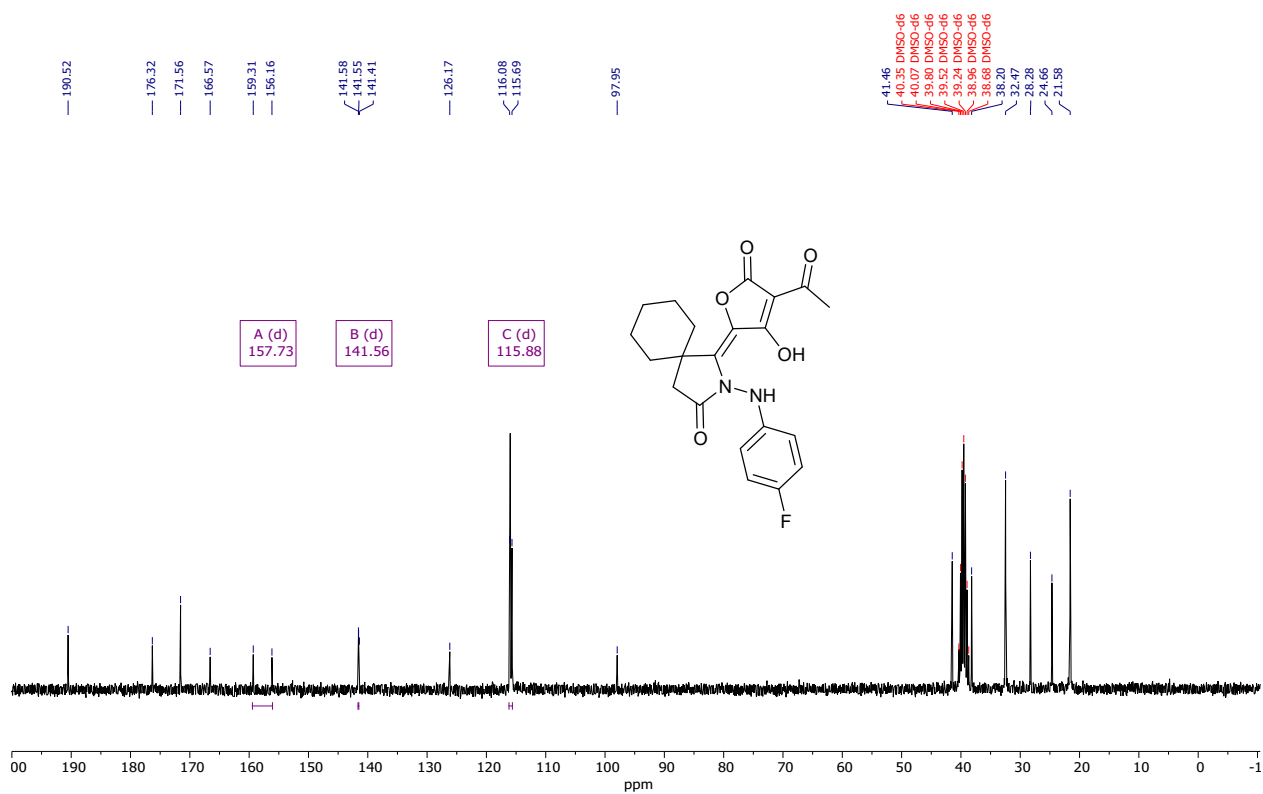

$^1\text{H}$  NMR spectrum (300 MHz) of **8e** in  $\text{DMSO-}d_6$

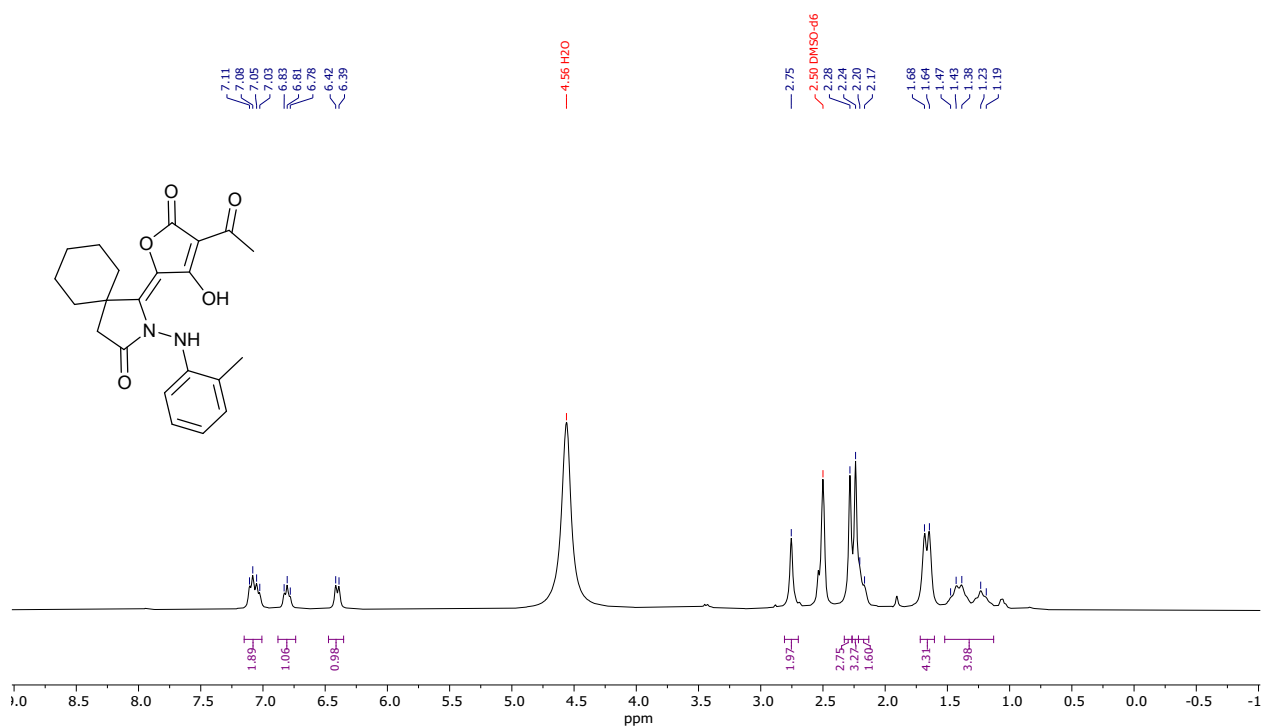

$^{13}\text{C}$   $\{^1\text{H}\}$  NMR spectrum (75 MHz) of **8e** in  $\text{DMSO-}d_6$

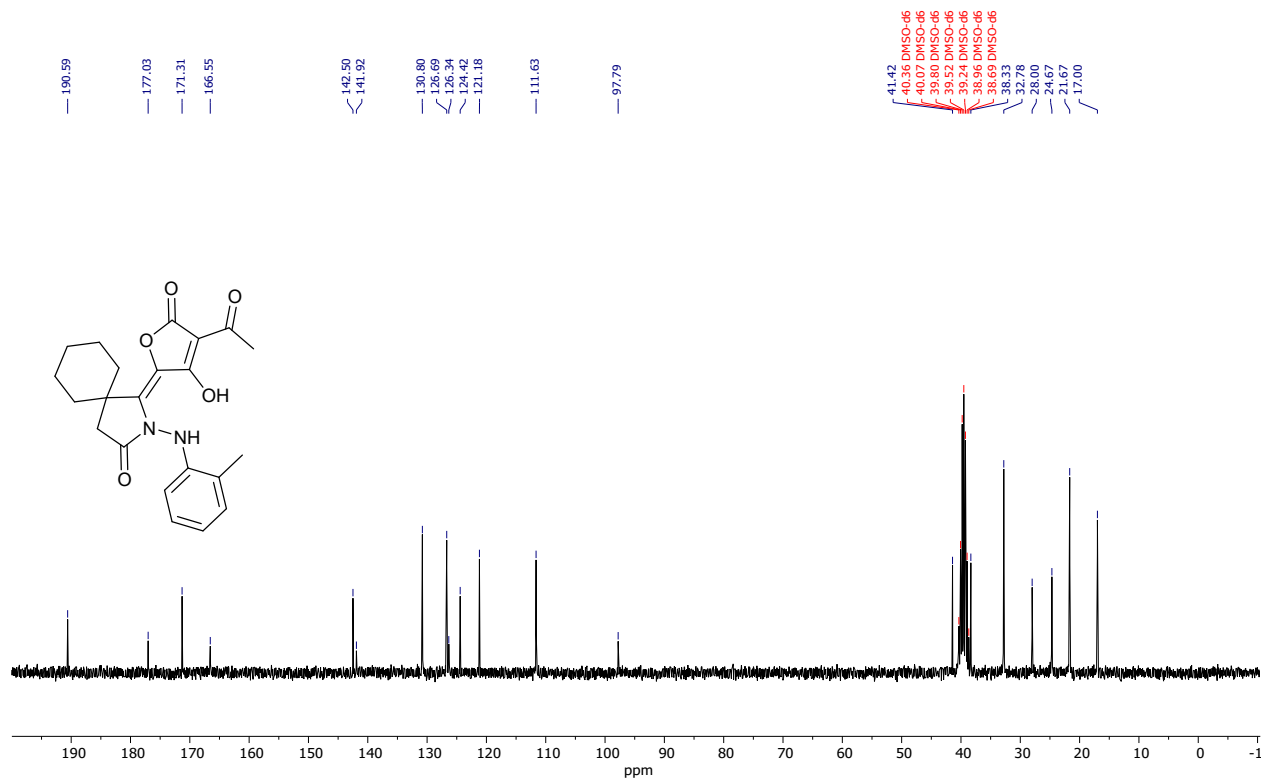



$^1\text{H}$  NMR spectrum (300 MHz) of **8f** in  $\text{DMSO-}d_6$

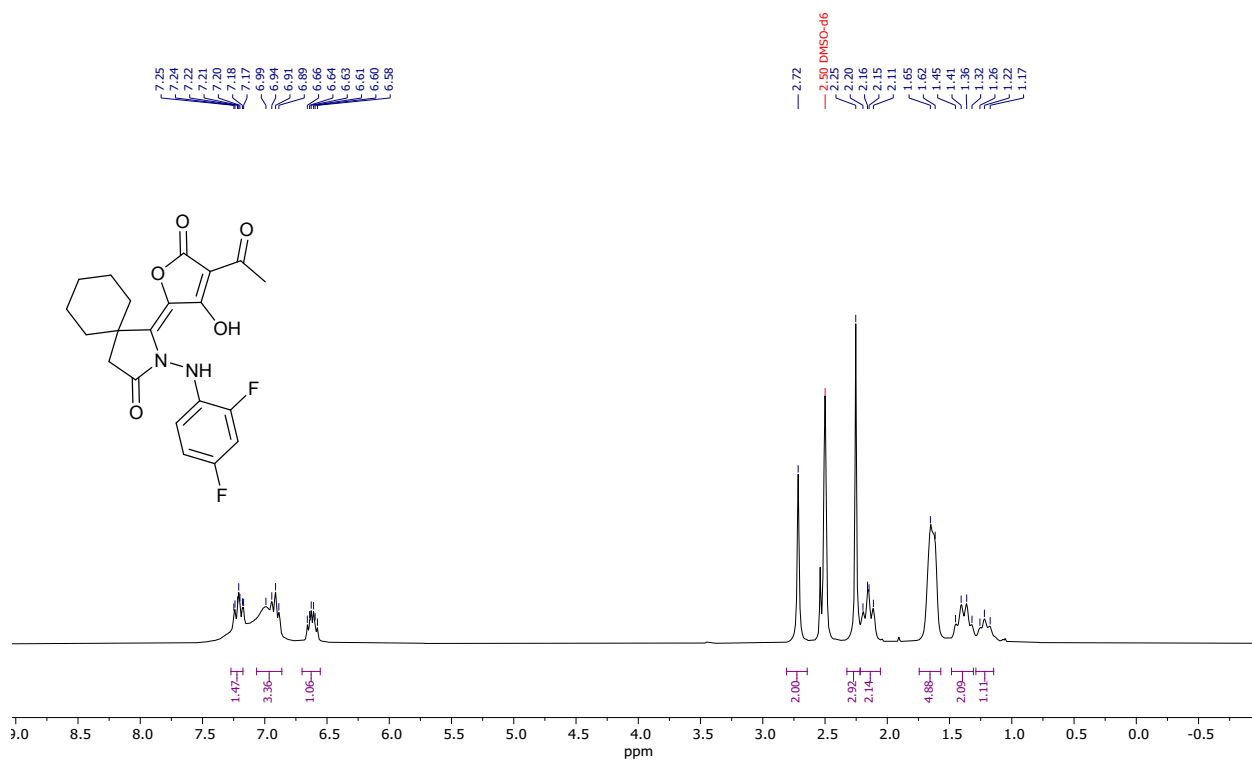

$^{13}\text{C}$   $\{^1\text{H}\}$  NMR spectrum (126 MHz) of **8f** in  $\text{DMSO-}d_6$



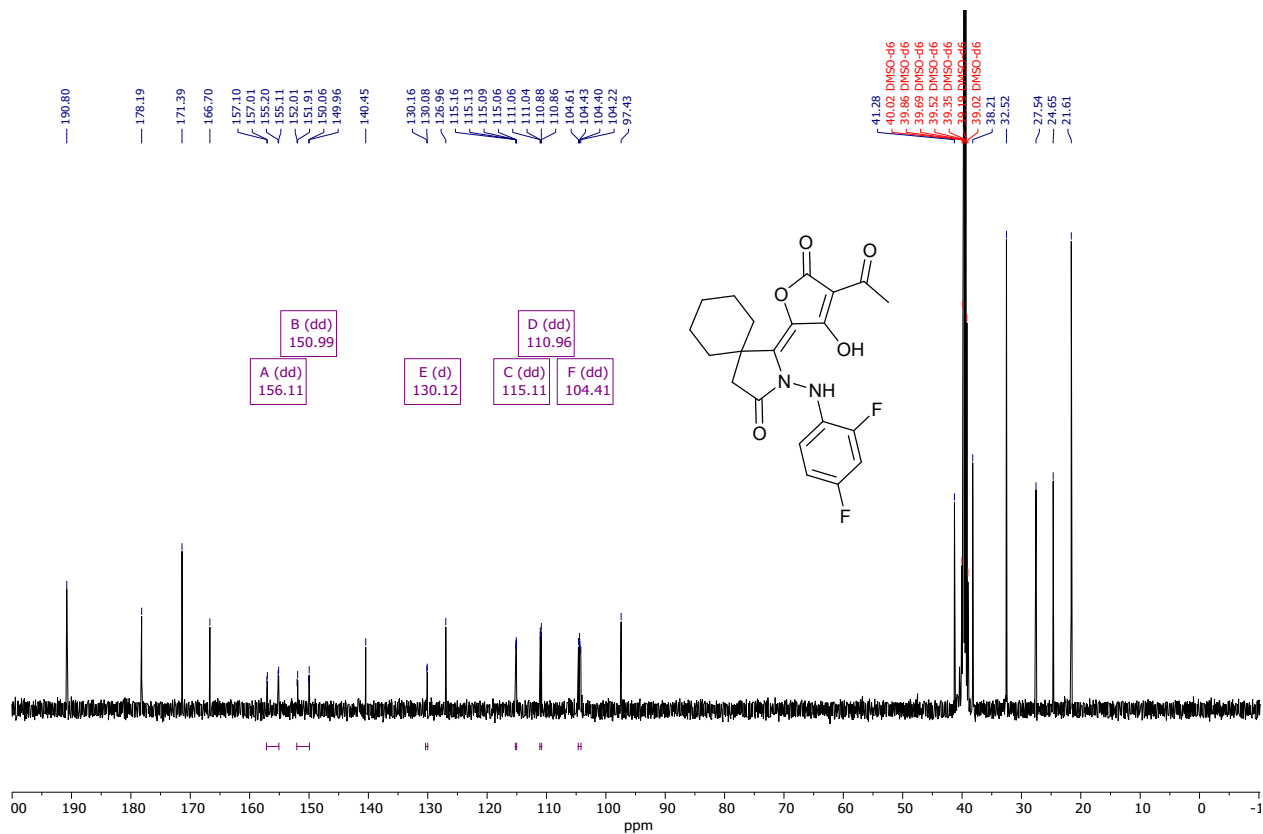

$^1\text{H}$  NMR spectrum (300 MHz) of **8g** in  $\text{DMSO-}d_6$

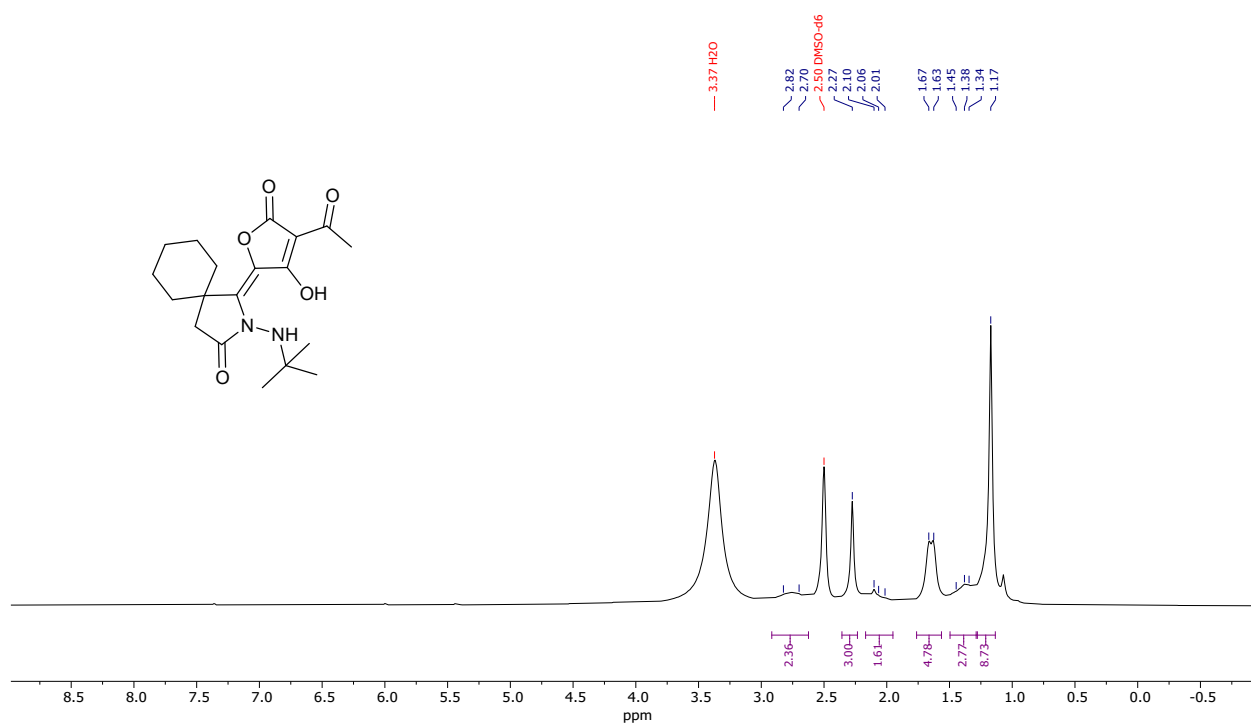

$^{13}\text{C}$   $\{^1\text{H}\}$  NMR spectrum (126 MHz) of **8g** in  $\text{DMSO-}d_6$

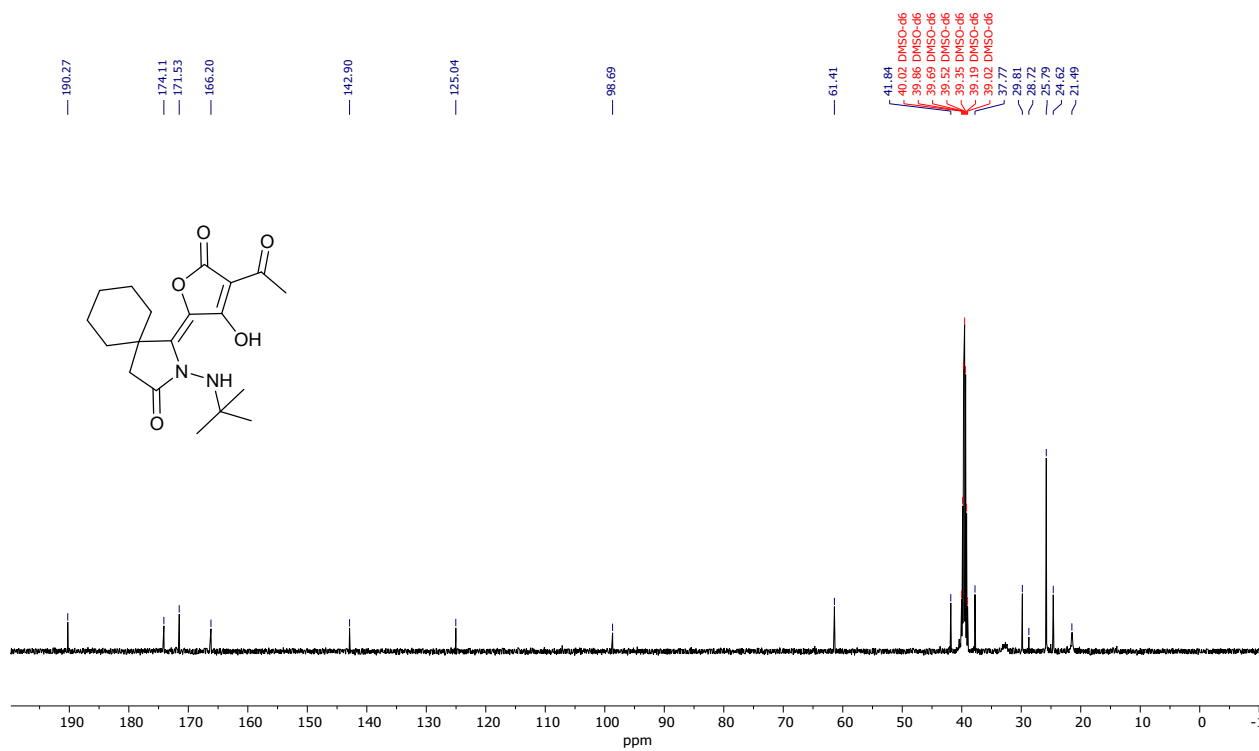

$^1\text{H}$  NMR spectrum (300 MHz) of **8h** in  $\text{DMSO-}d_6$

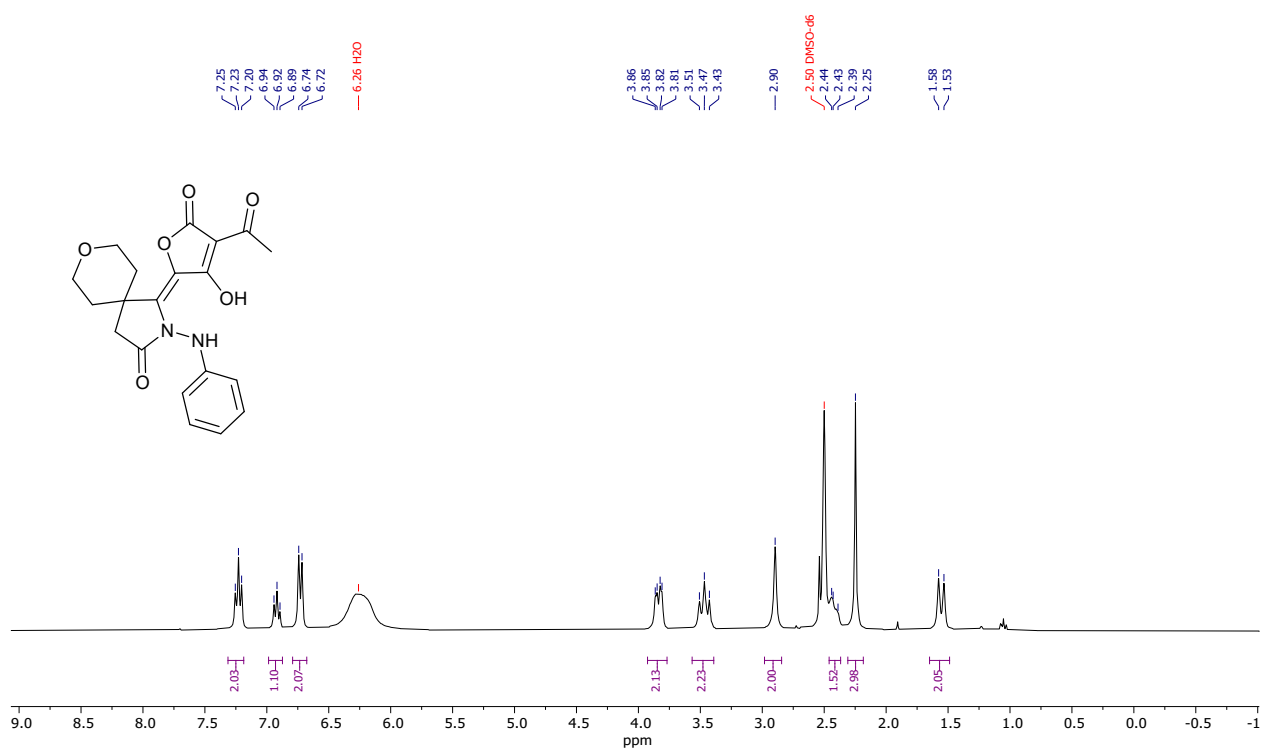

$^{13}\text{C}$   $\{^1\text{H}\}$  NMR spectrum (75 MHz) of **8h** in  $\text{DMSO-}d_6$

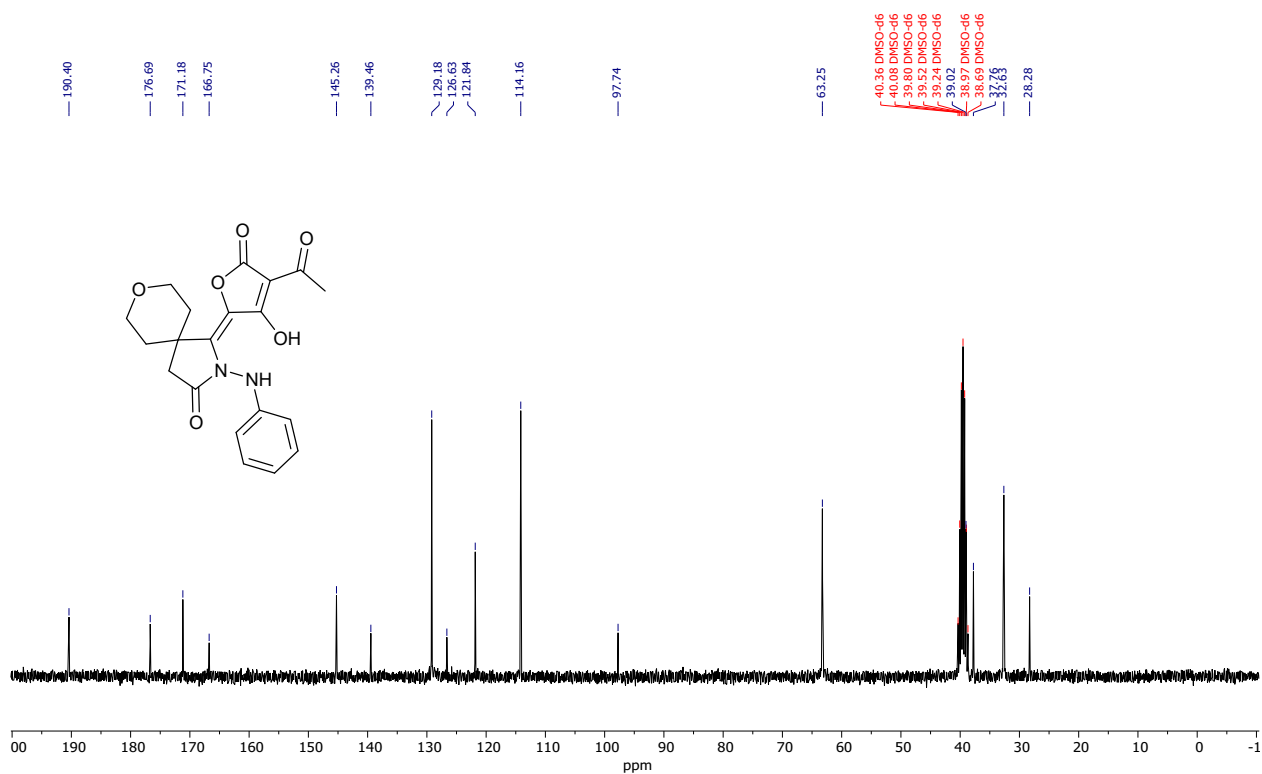

$^1\text{H}$  NMR spectrum (300 MHz) of **8i** in  $\text{DMSO-}d_6$

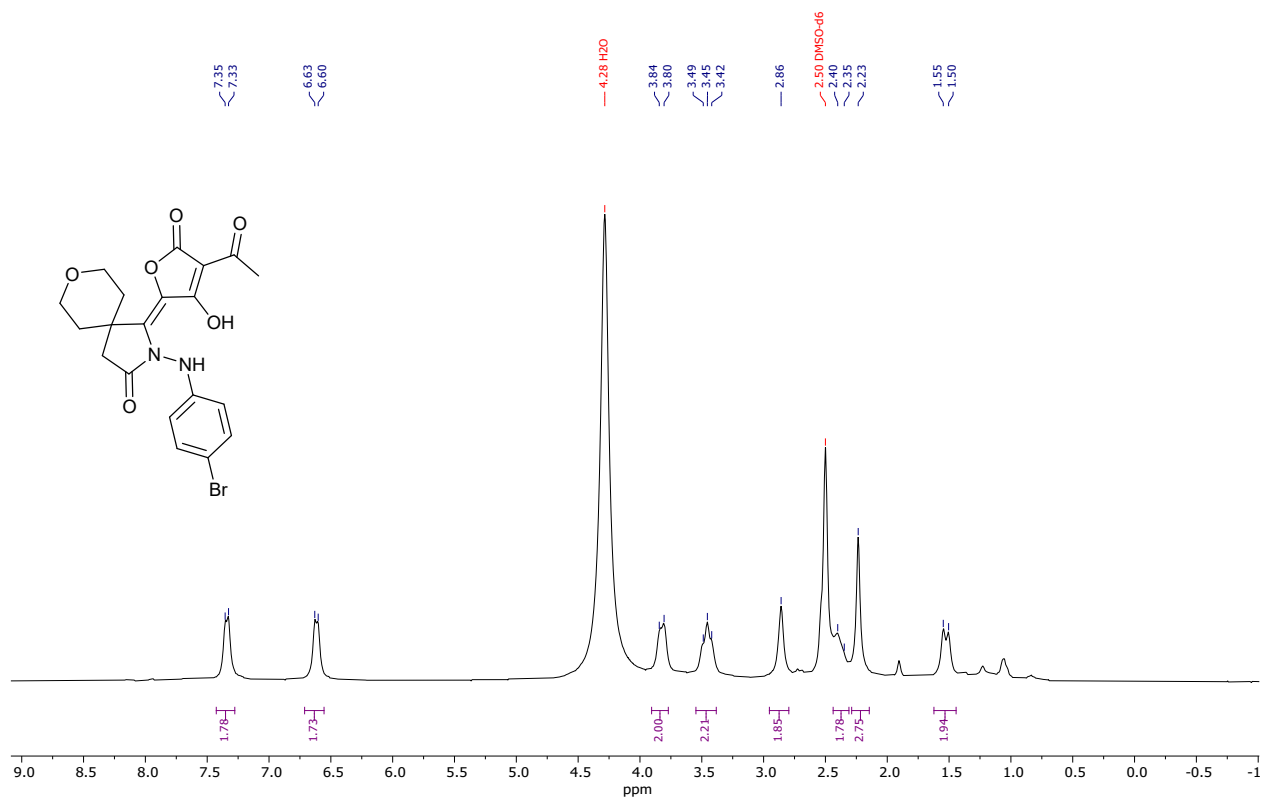

$^{13}\text{C}$   $\{^1\text{H}\}$  NMR spectrum (126 MHz) of **8i** in  $\text{DMSO-}d_6$

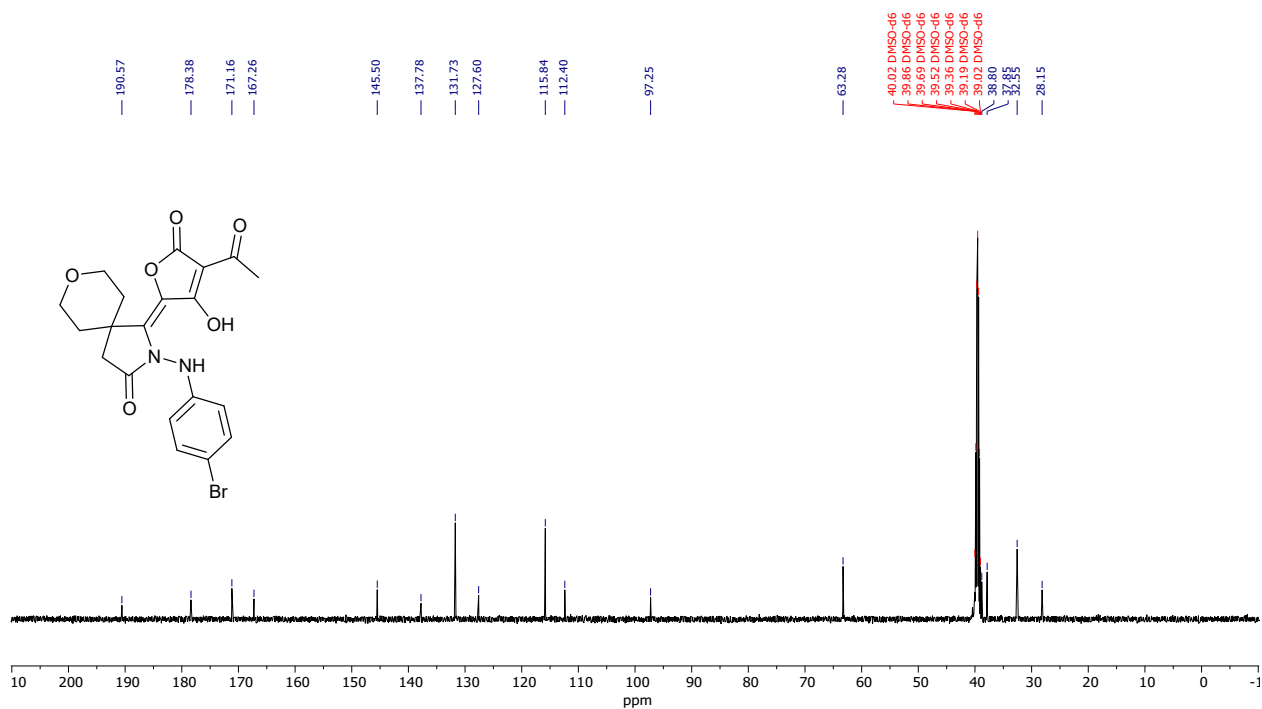

$^1\text{H}$  NMR spectrum (300 MHz) of **8j** in  $\text{DMSO-}d_6$

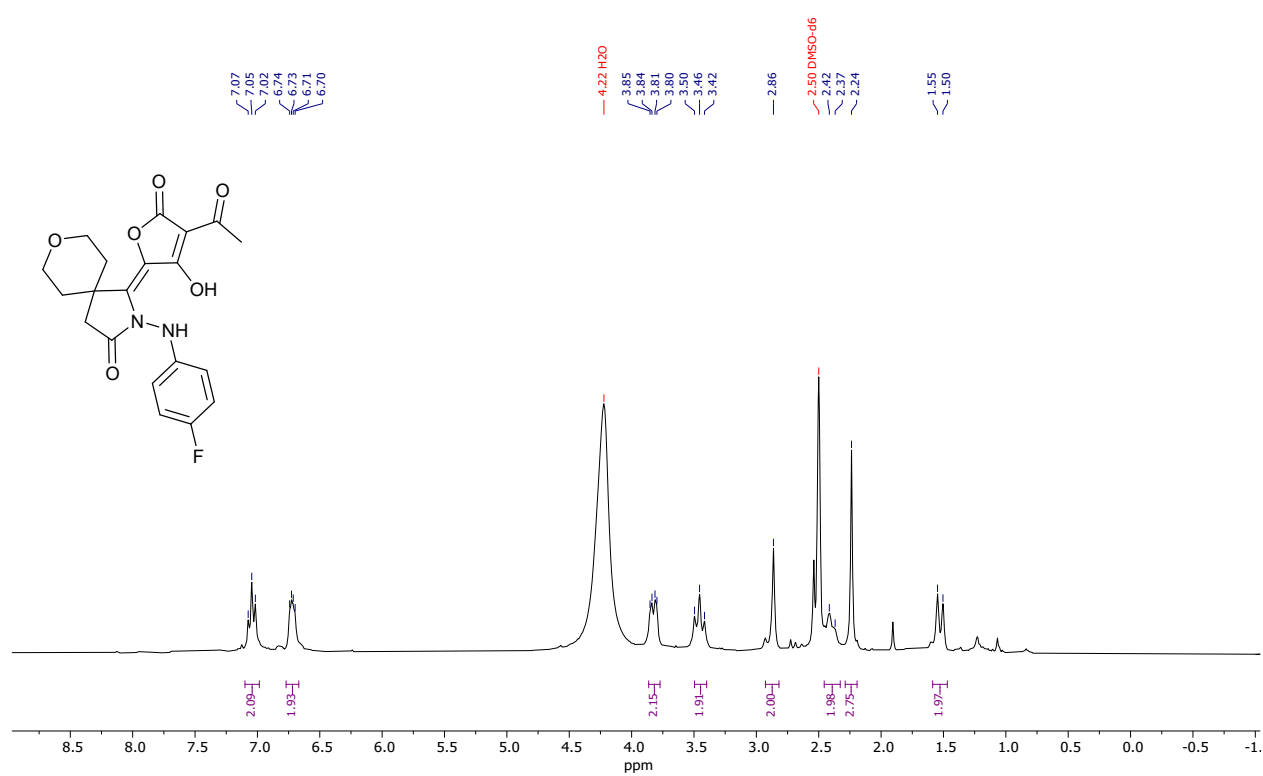

$^{13}\text{C}$   $\{^1\text{H}\}$  NMR spectrum (126 MHz) of **8j** in  $\text{DMSO-}d_6$

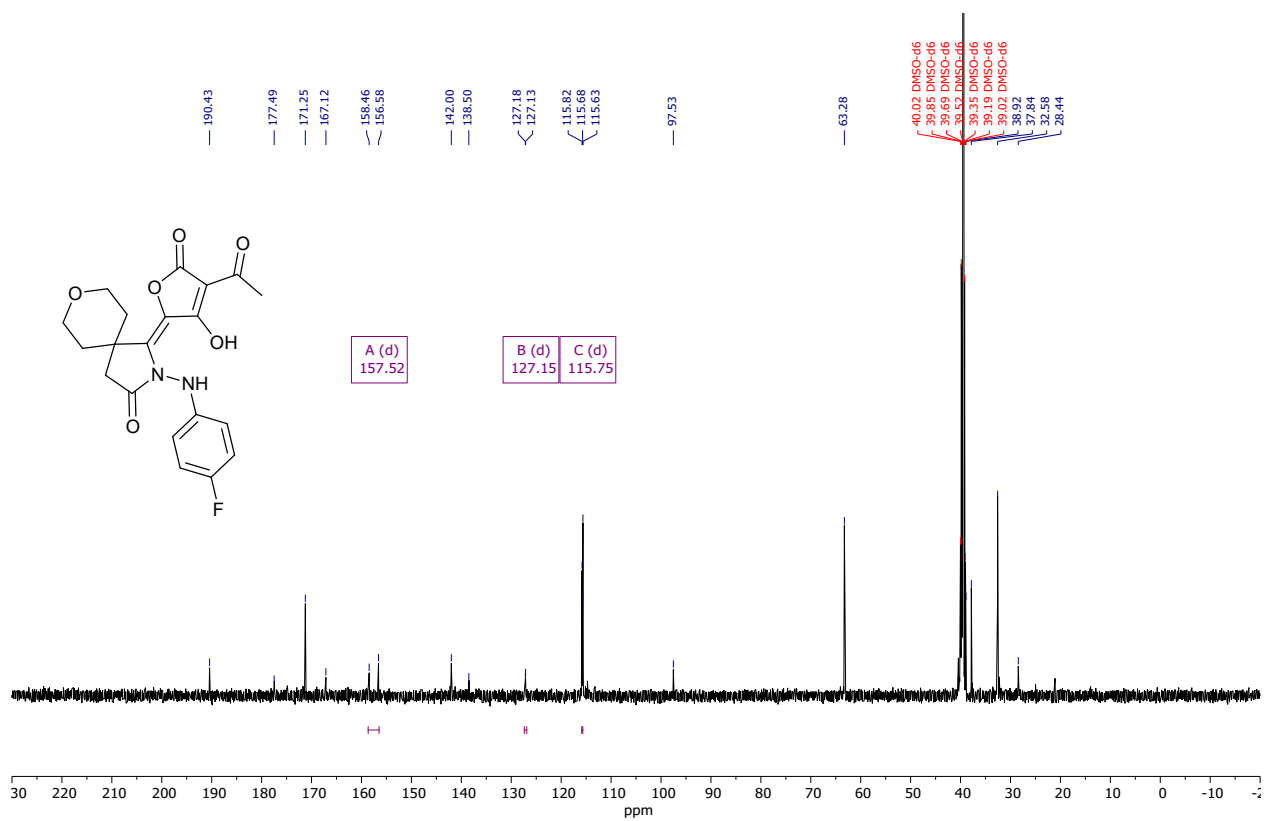

$^1\text{H}$  NMR spectrum (300 MHz) of **8k** in  $\text{DMSO-}d_6$

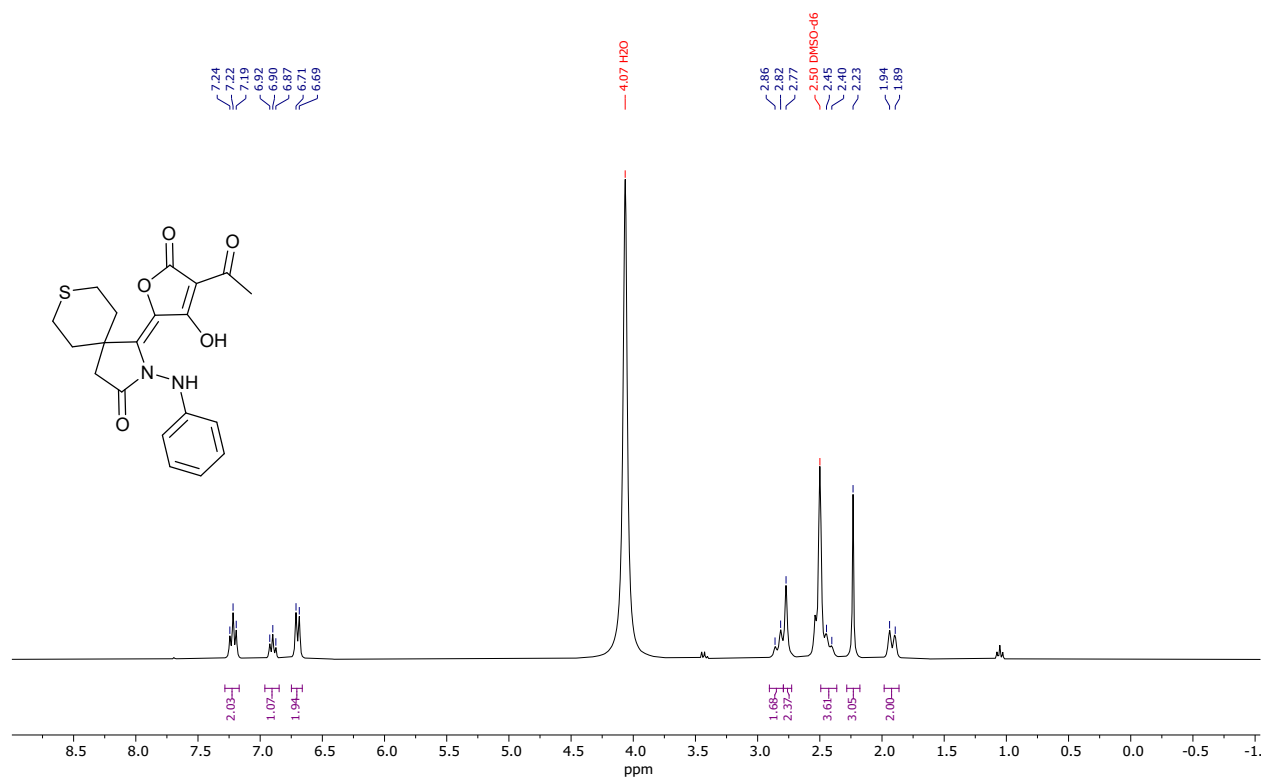

$^{13}\text{C}$   $\{^1\text{H}\}$  NMR spectrum (75 MHz) of **8k** in  $\text{DMSO-}d_6$

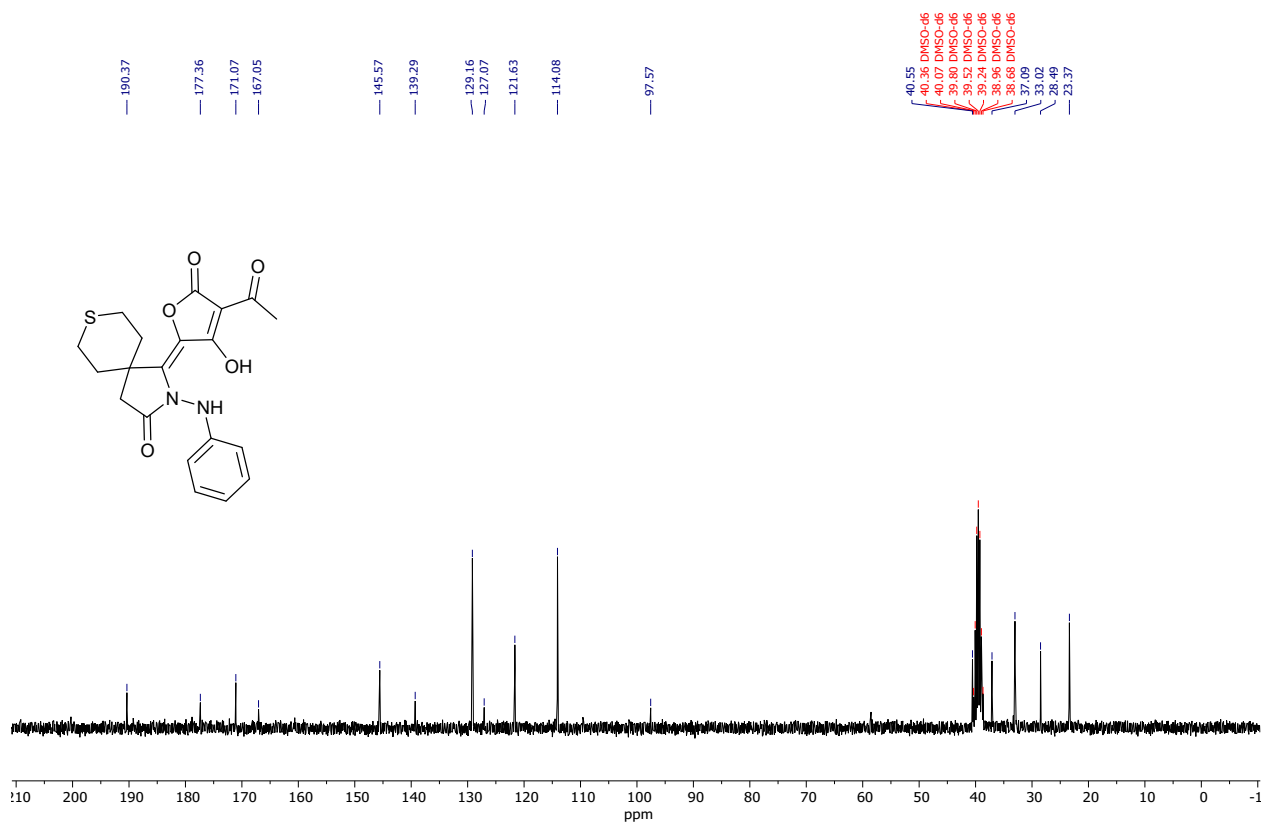

<sup>1</sup>H NMR spectrum (300 MHz) of **8I** in DMSO-*d*<sub>6</sub>

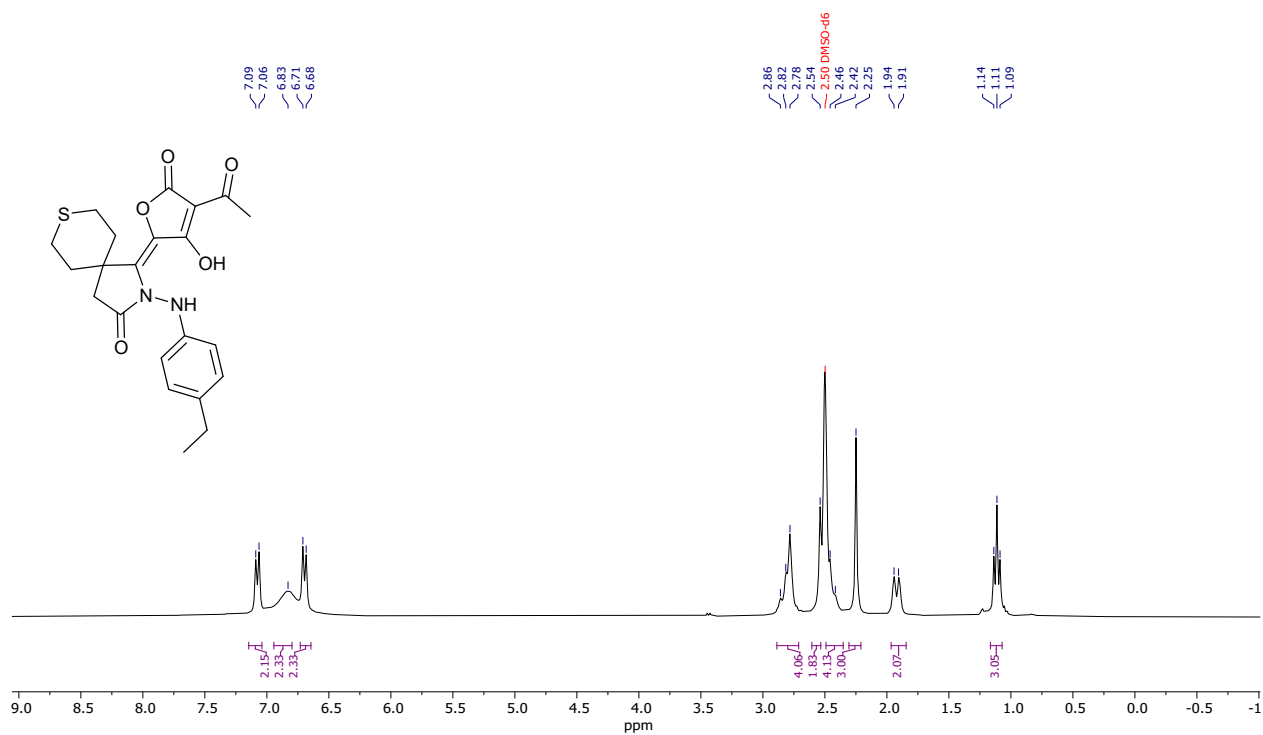



$^{13}\text{C}$   $\{^1\text{H}\}$  NMR spectrum (75 MHz) of **8I** in  $\text{DMSO-}d_6$

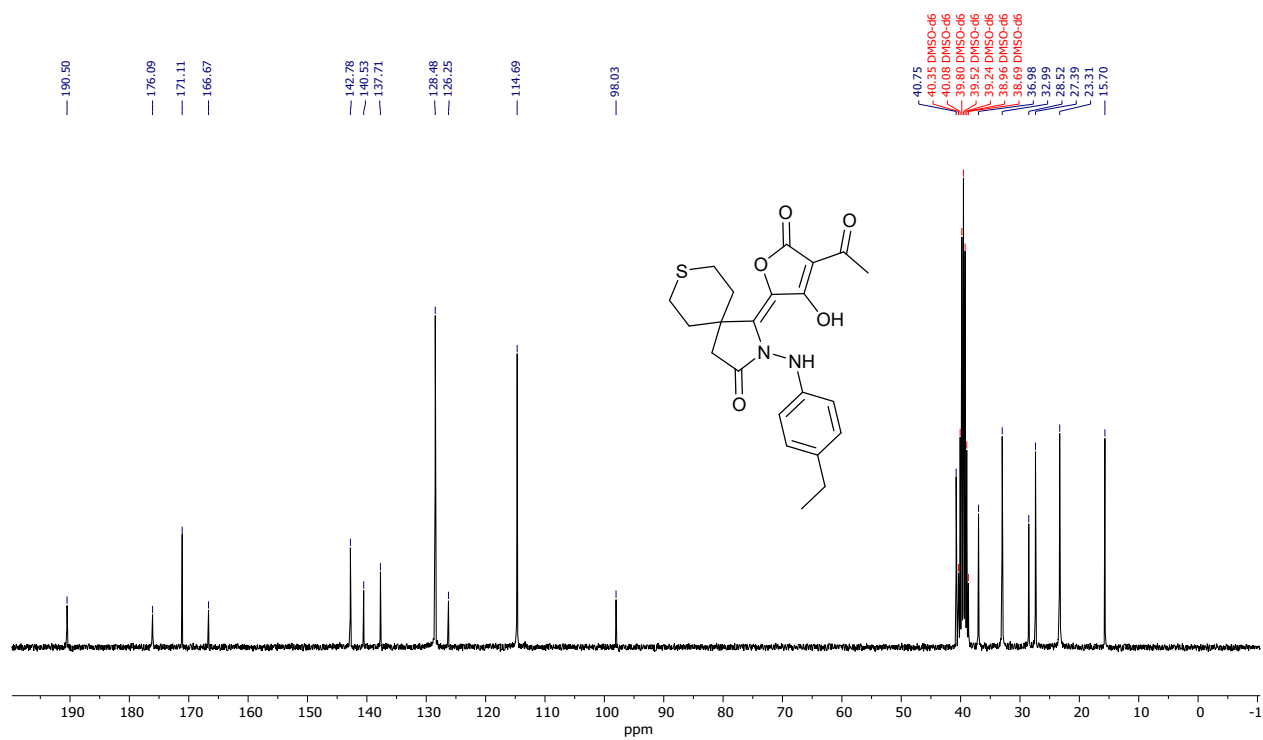

$^1\text{H}$  NMR spectrum (300 MHz) of **8m** in  $\text{DMSO-}d_6$

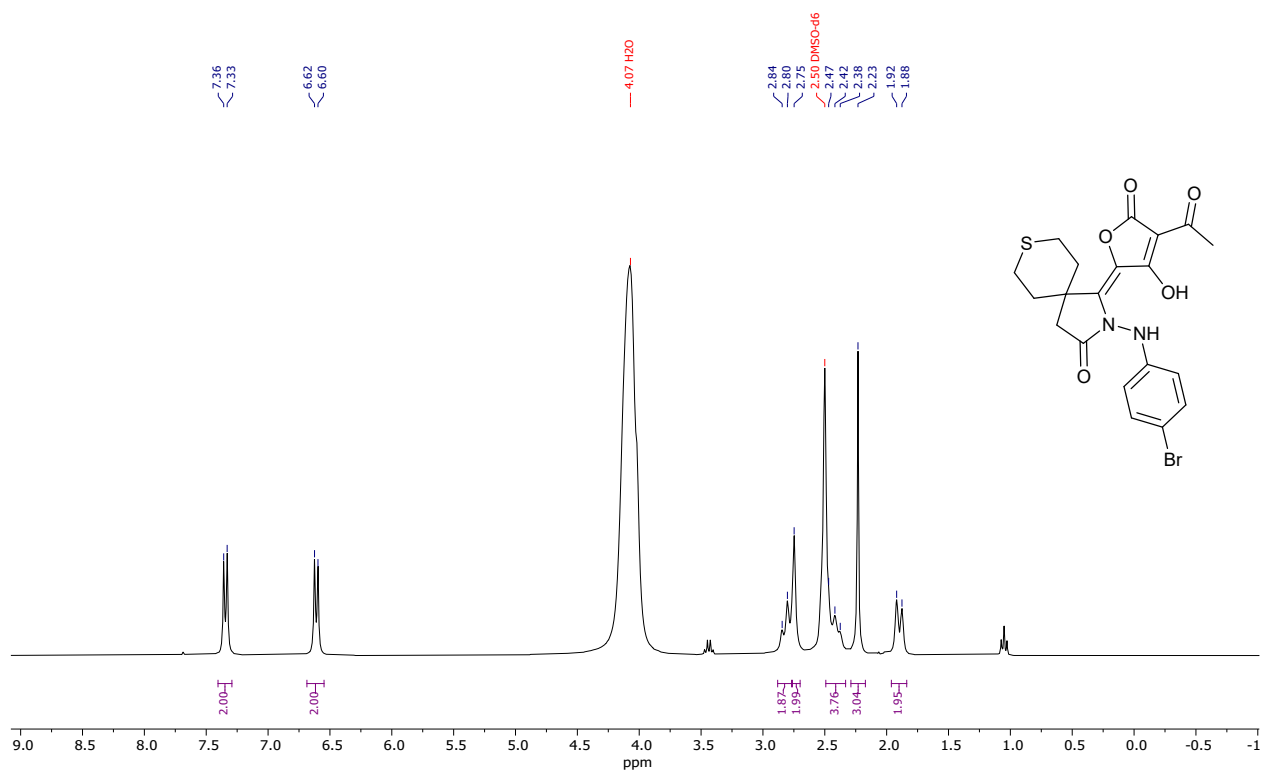

$^{13}\text{C}$   $\{^1\text{H}\}$  NMR spectrum (75 MHz) of **8m** in  $\text{DMSO-}d_6$

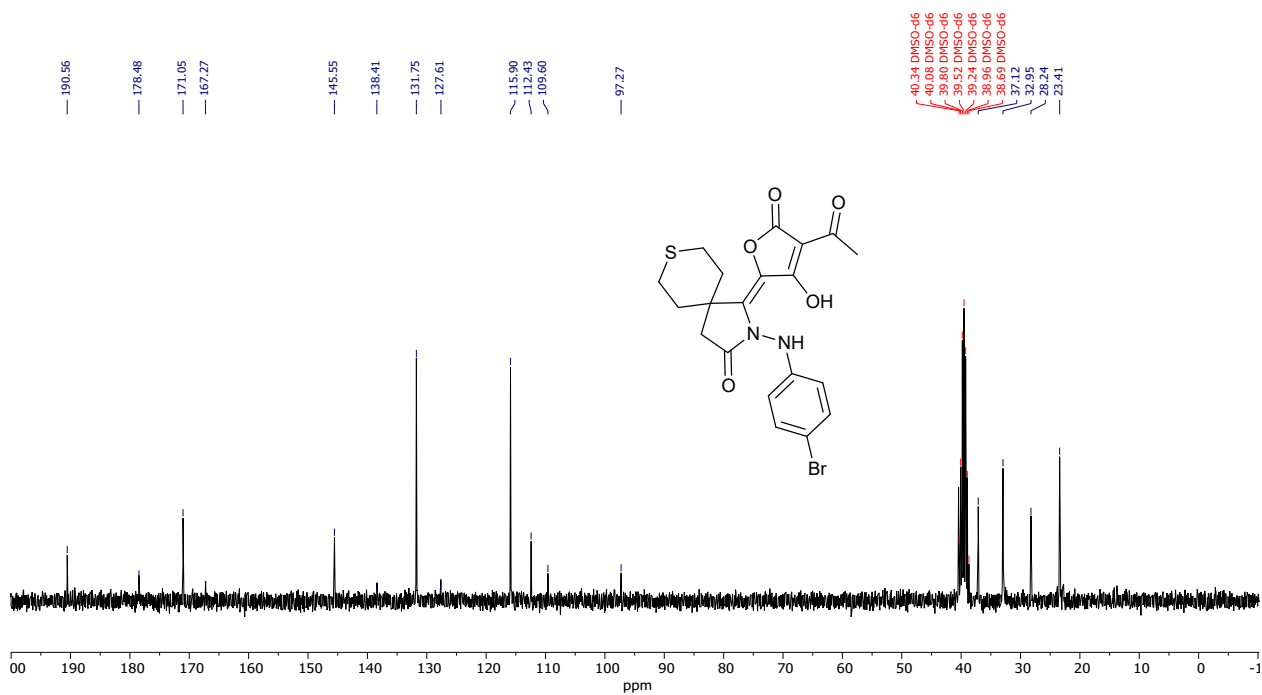

$^1\text{H}$  NMR spectrum (300 MHz) of **8n** in  $\text{DMSO-}d_6$

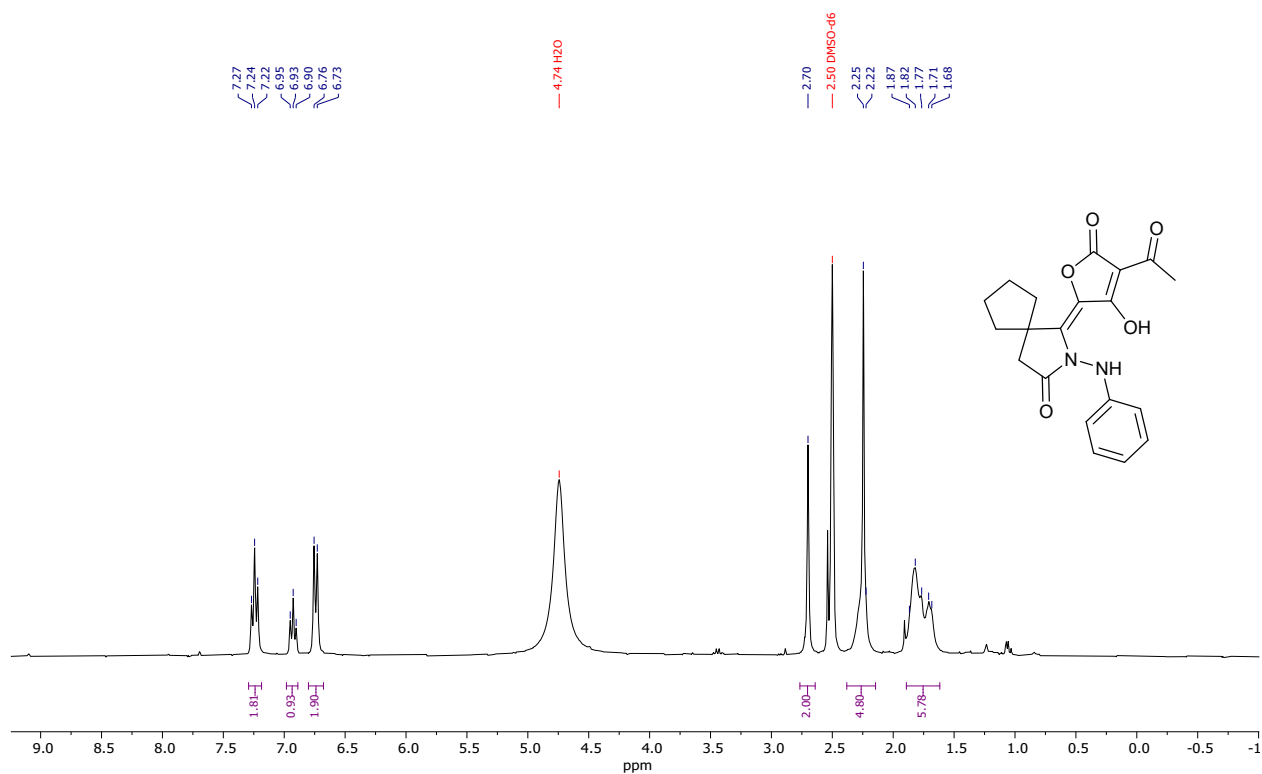

$^{13}\text{C}$   $\{^1\text{H}\}$  NMR spectrum (126 MHz) of **8n** in  $\text{DMSO-}d_6$

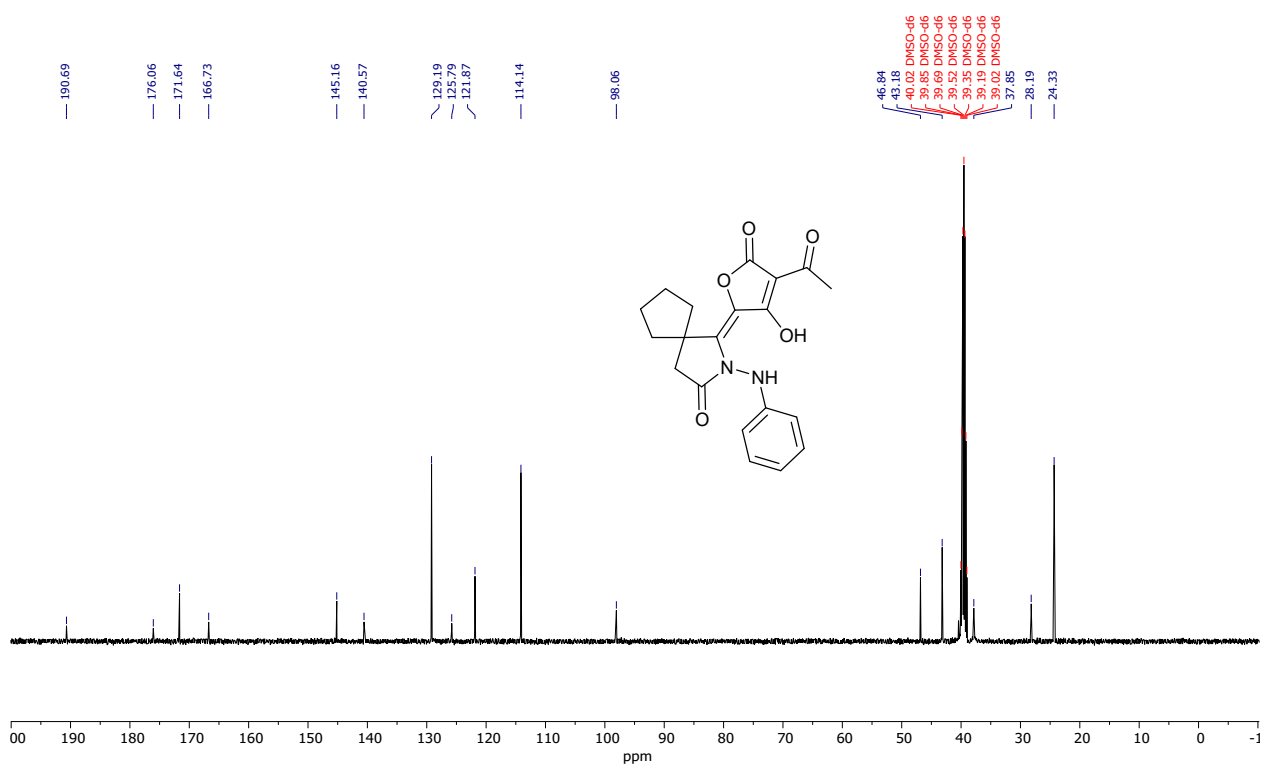

$^1\text{H}$  NMR spectrum (300 MHz) of **8o** in  $\text{DMSO-}d_6$

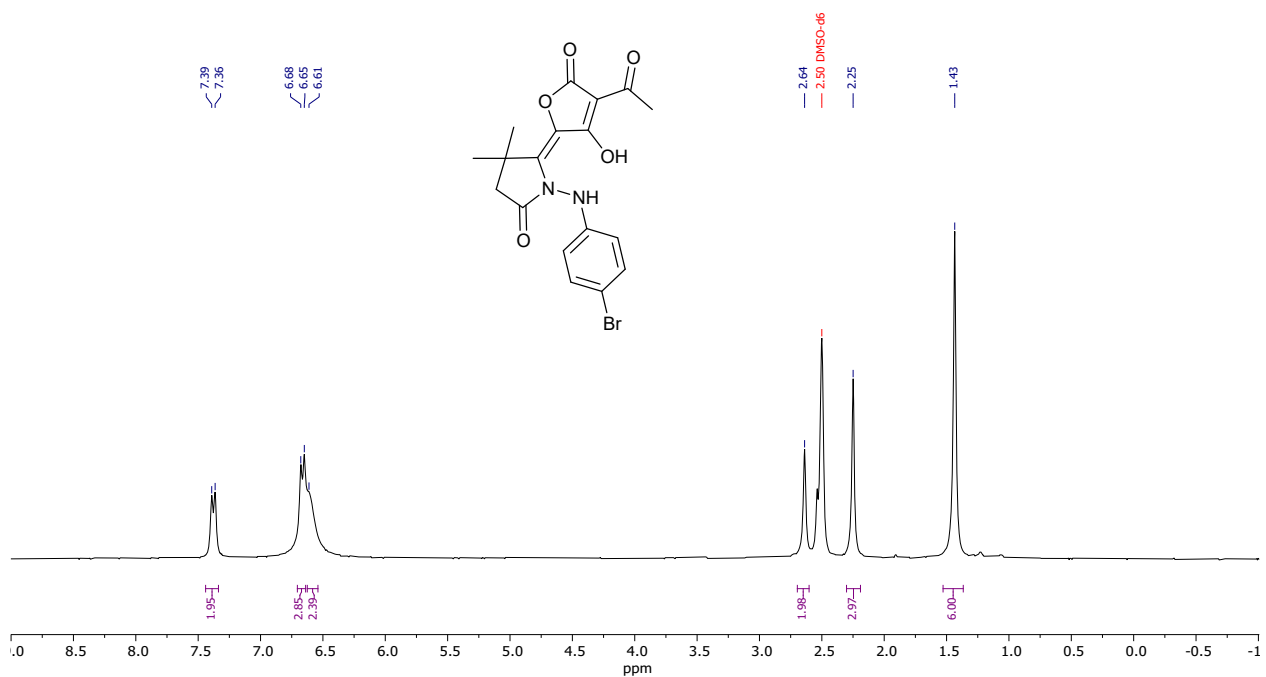

$^{13}\text{C}$   $\{^1\text{H}\}$  NMR spectrum (126 MHz) of **8o** in  $\text{DMSO-}d_6$

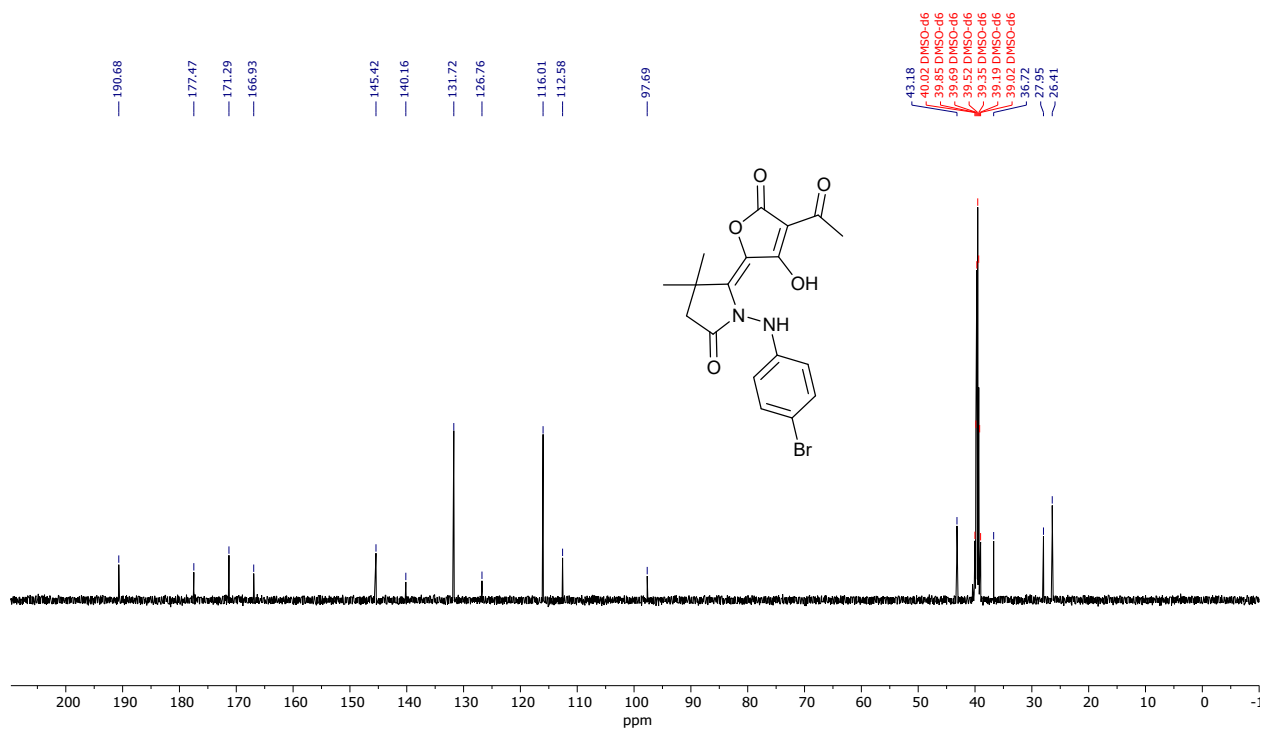

### 6.3 Intermediates 14

$^1\text{H}$  NMR spectrum (300 MHz) of **14a** in  $\text{DMSO-}d_6$

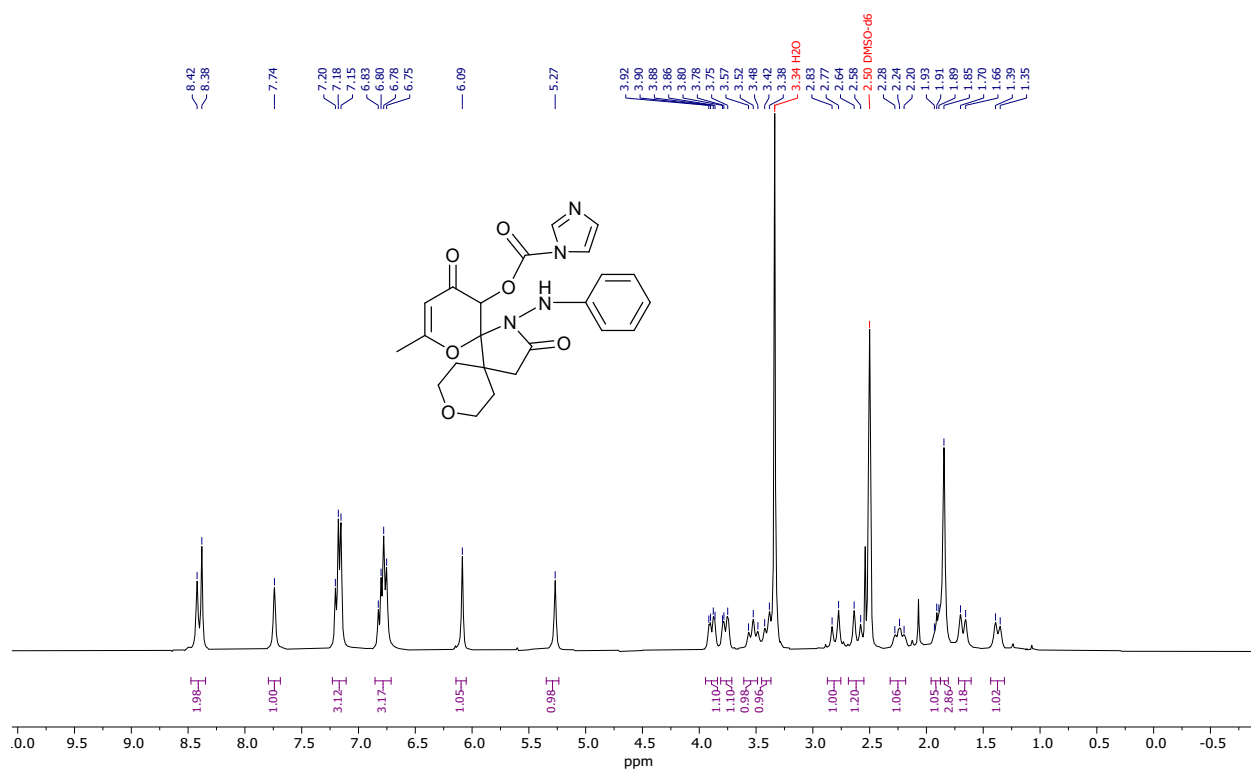

$^{13}\text{C}$   $\{^1\text{H}\}$  NMR spectrum (75 MHz) of **14a** in  $\text{DMSO-}d_6$

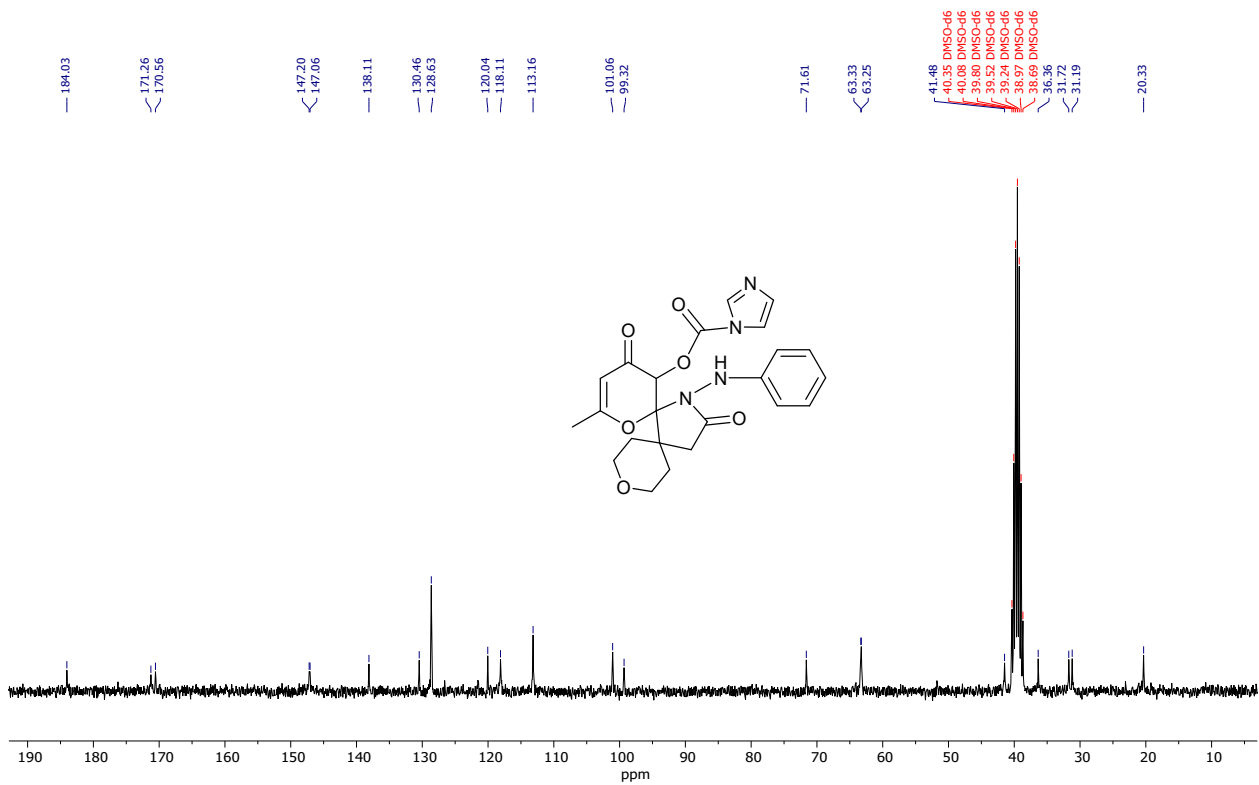

$^1\text{H}$  NMR spectrum (300 MHz) of **14b** in  $\text{DMSO-}d_6$

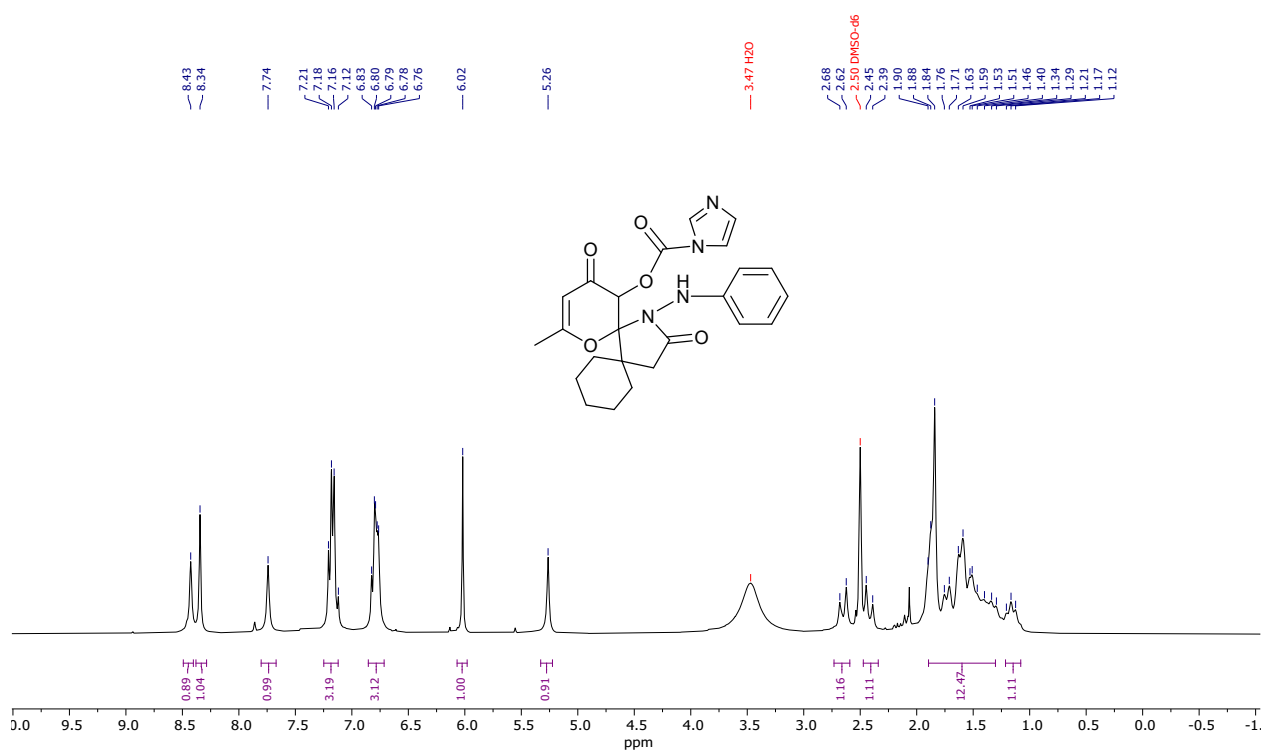

$^{13}\text{C}$   $\{^1\text{H}\}$  NMR spectrum (75 MHz) of **14b** in  $\text{DMSO-}d_6$

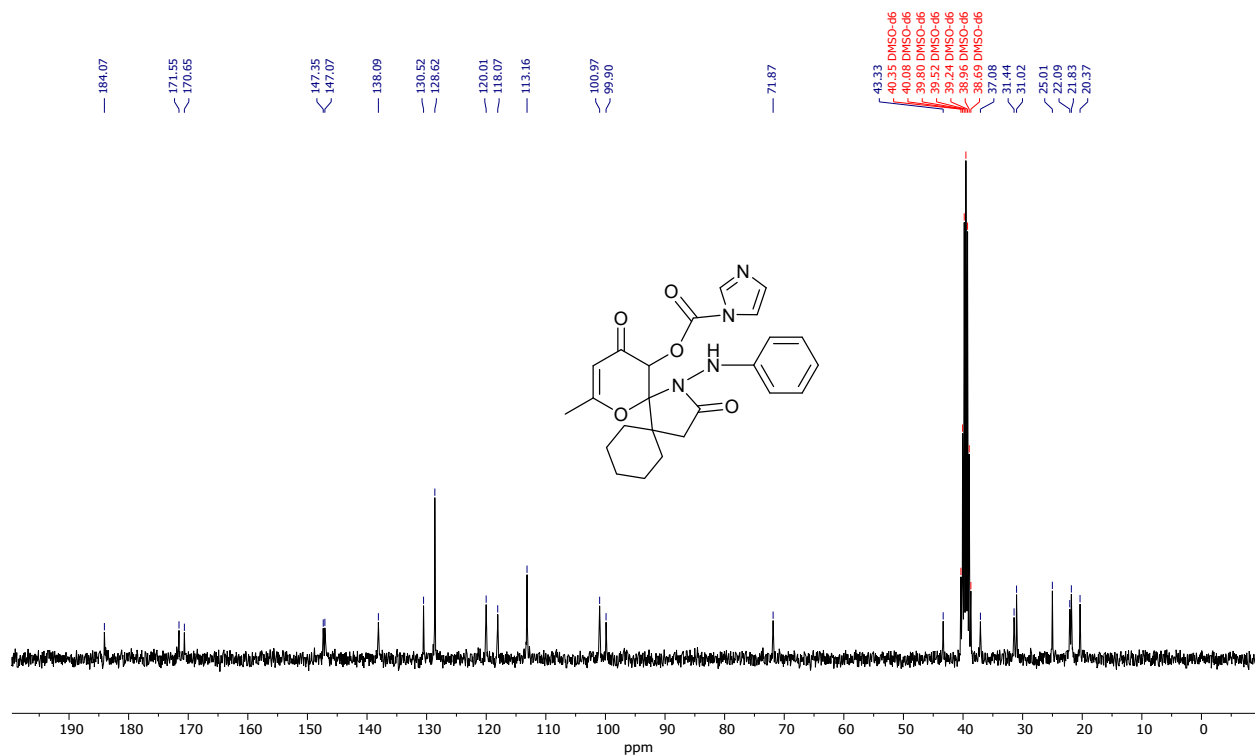

## 6.4 Compounds 16-19

$^1\text{H}$  NMR spectrum (300 MHz) of **16a** in  $\text{DMSO-}d_6$

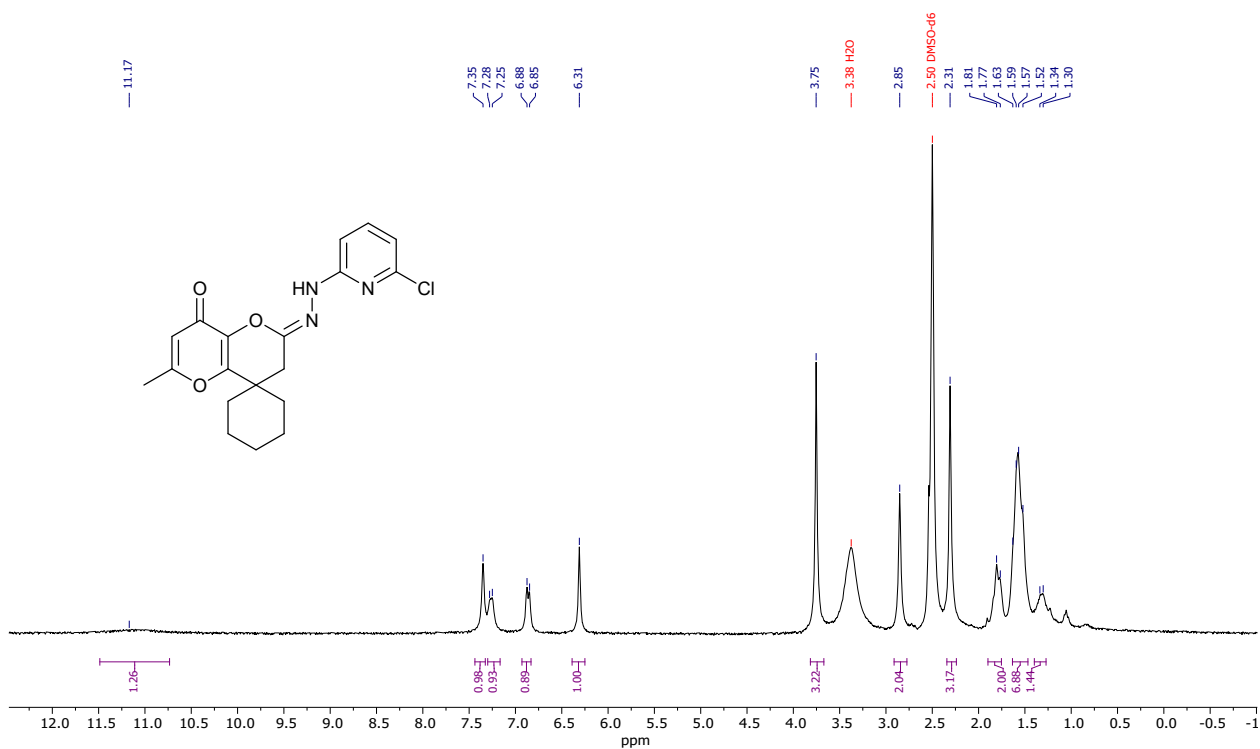

$^{13}\text{C}$   $\{^1\text{H}\}$  NMR spectrum (126 MHz) of **16a** in  $\text{DMSO-}d_6$

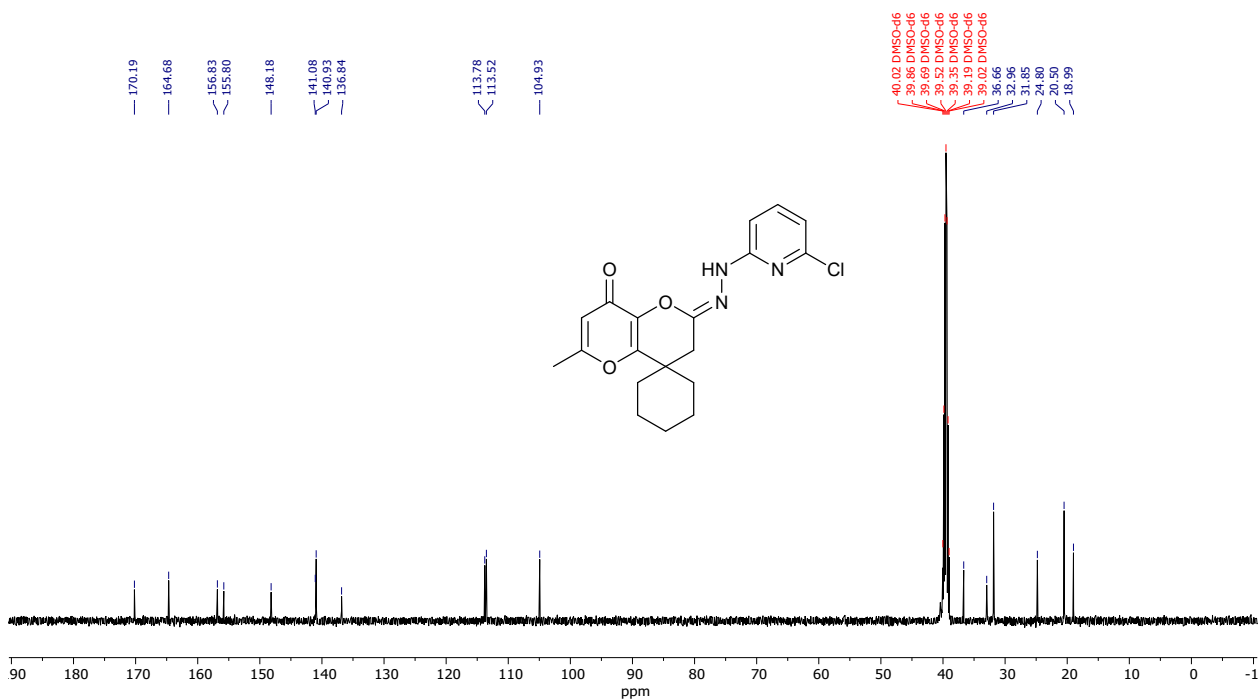



$^1\text{H}$  NMR spectrum (300 MHz) of **16b** in  $\text{DMSO-}d_6$

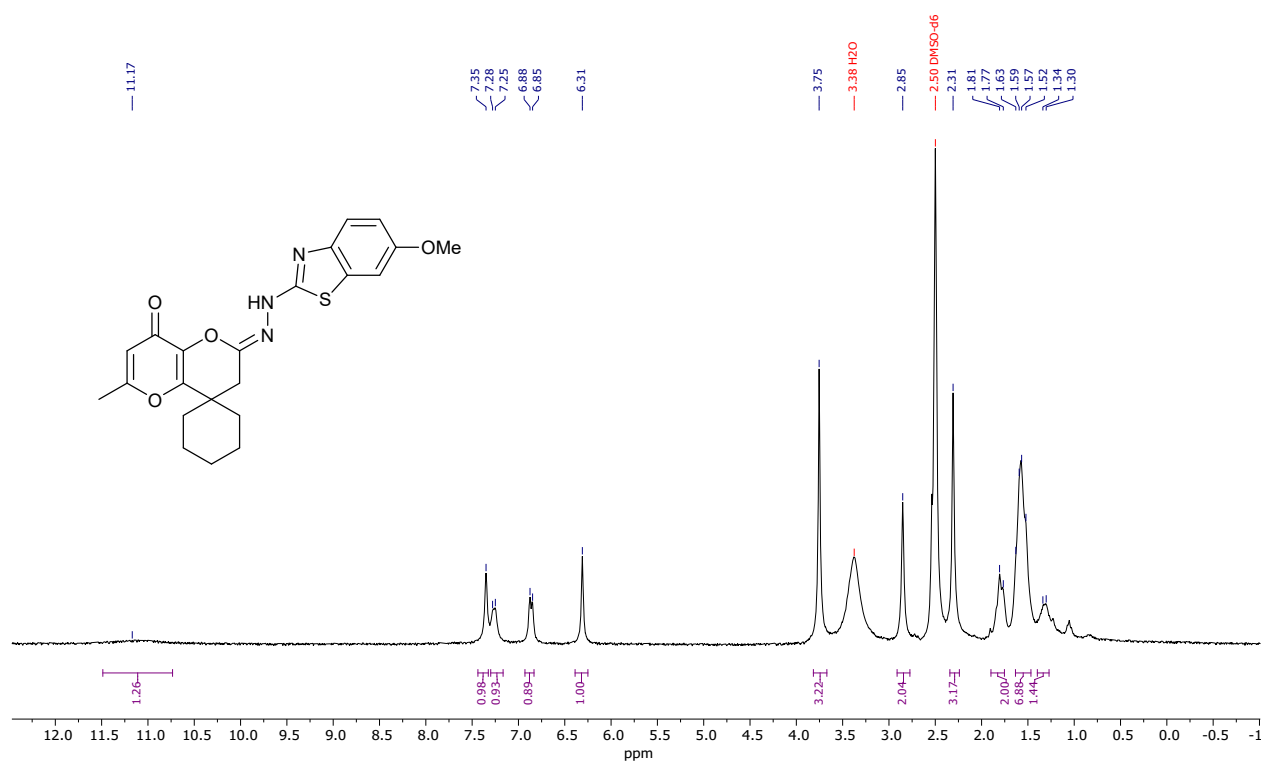

$^{13}\text{C}$   $\{^1\text{H}\}$  NMR spectrum (151 MHz) of **16b** in  $\text{DMSO-}d_6$

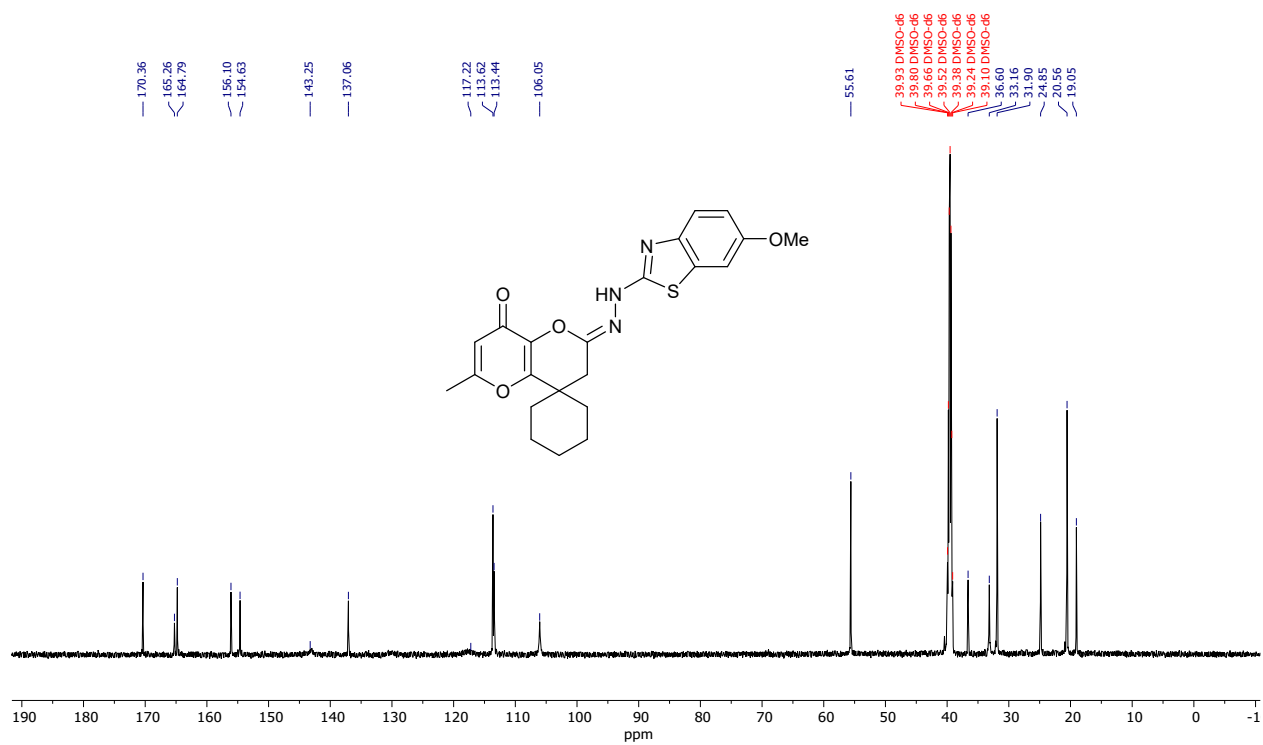

$^1\text{H}$  NMR spectrum (300 MHz) of **17** in  $\text{DMSO-}d_6$

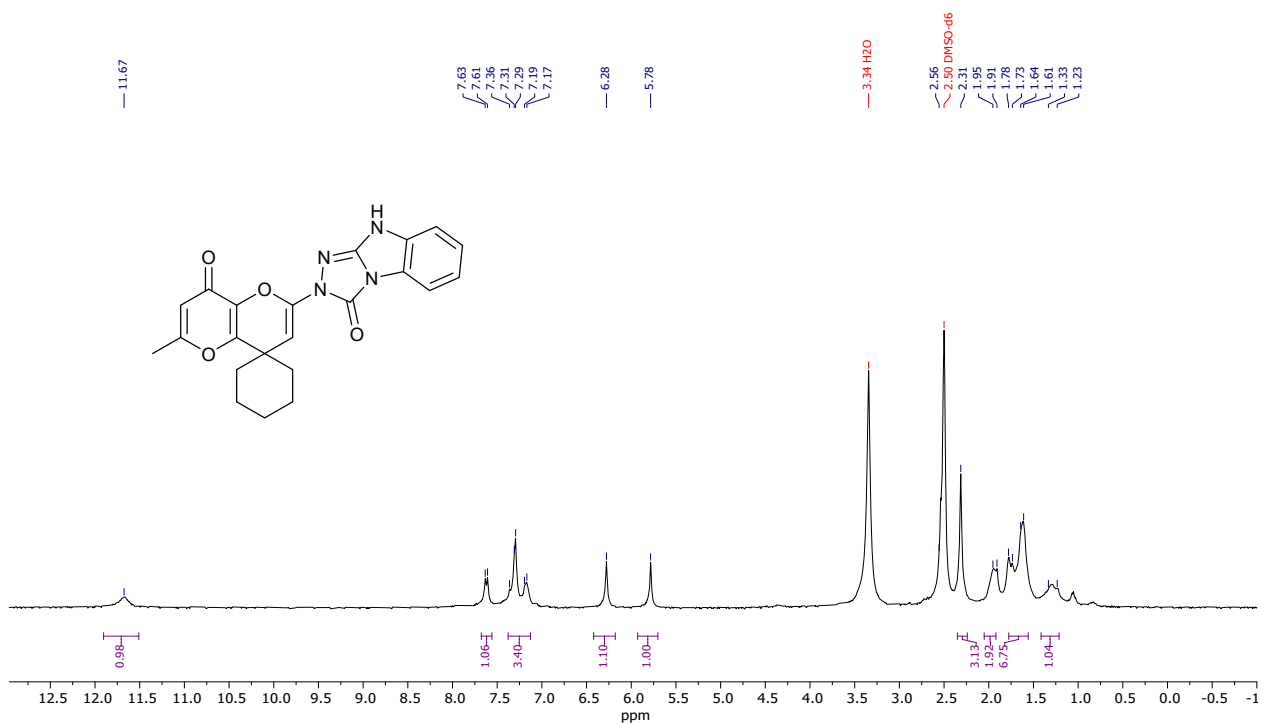

$^{13}\text{C}$   $\{^1\text{H}\}$  NMR spectrum (126 MHz) of **17** in  $\text{DMSO-}d_6$

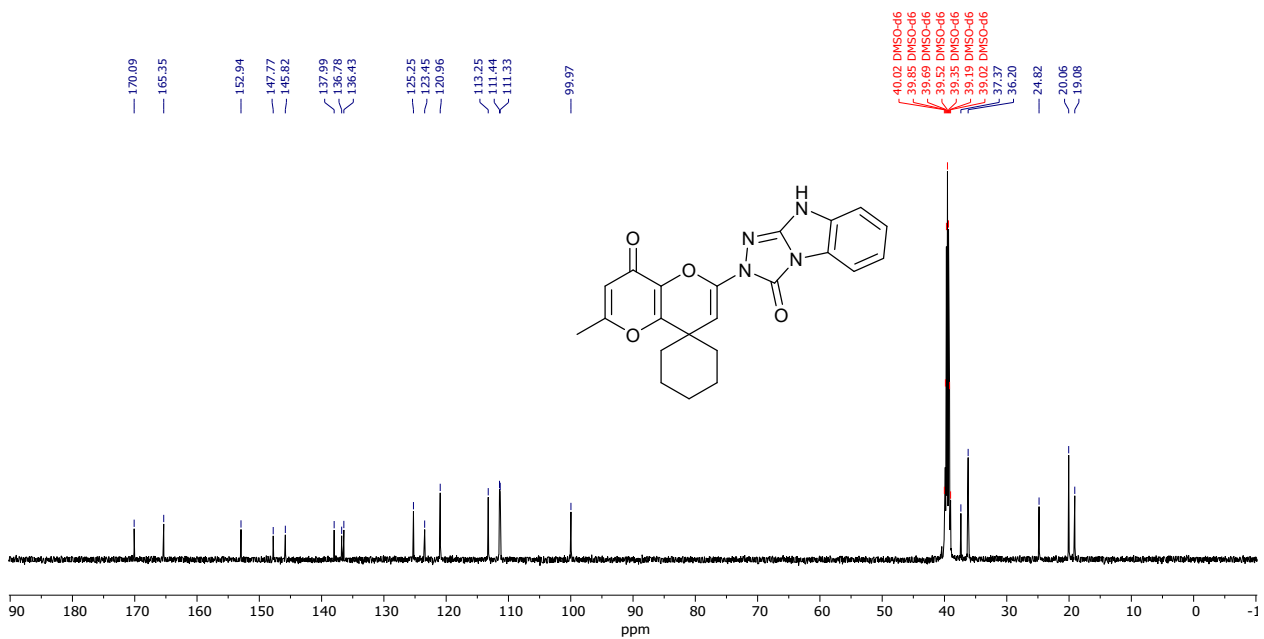

$^1\text{H}$  NMR spectrum (300 MHz) of **18a** in  $\text{DMSO-}d_6$

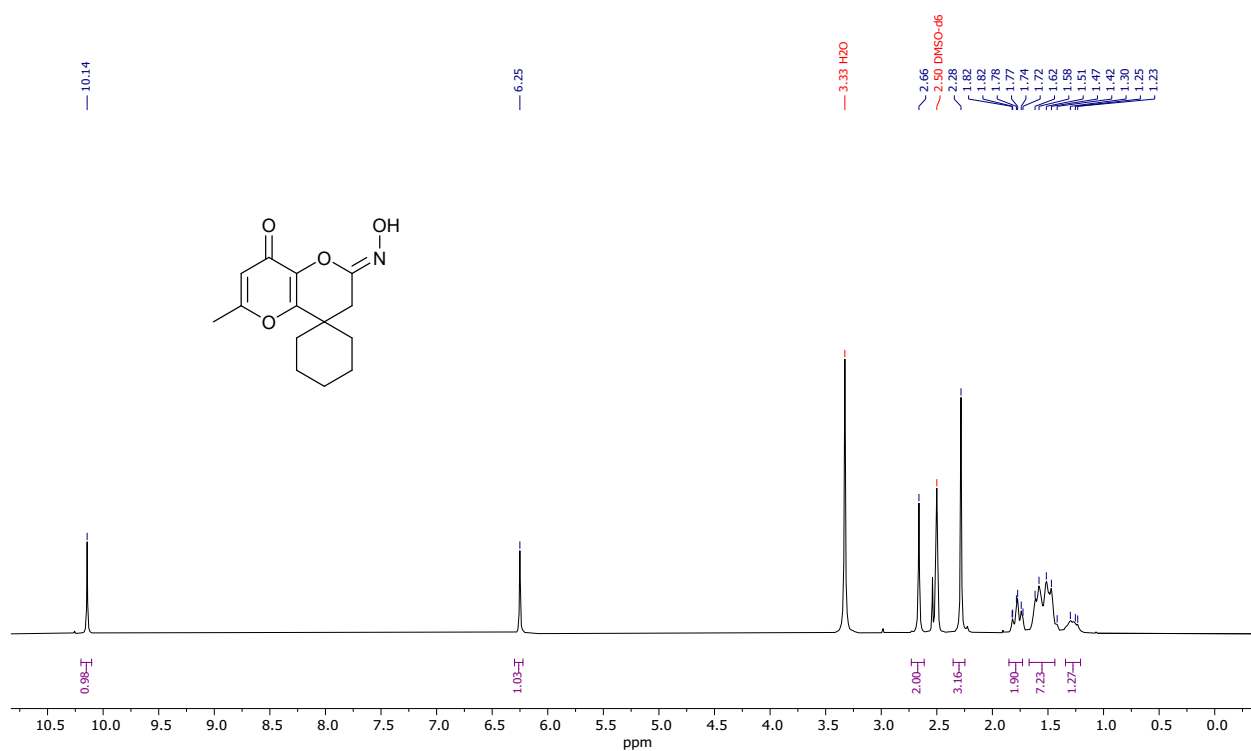

$^{13}\text{C}$   $\{^1\text{H}\}$  NMR spectrum (75 MHz) of **18a** in  $\text{DMSO-}d_6$

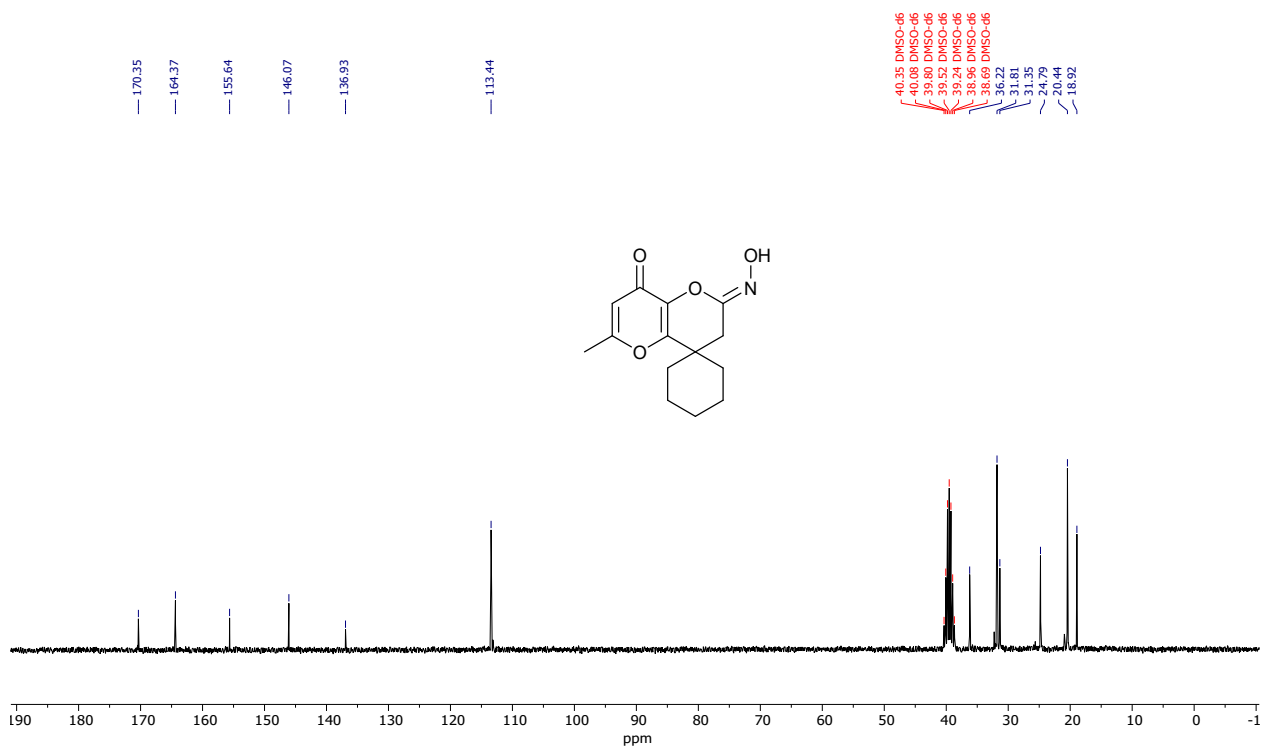



$^1\text{H}$  NMR spectrum (300 MHz) of **18b** in  $\text{DMSO-}d_6$

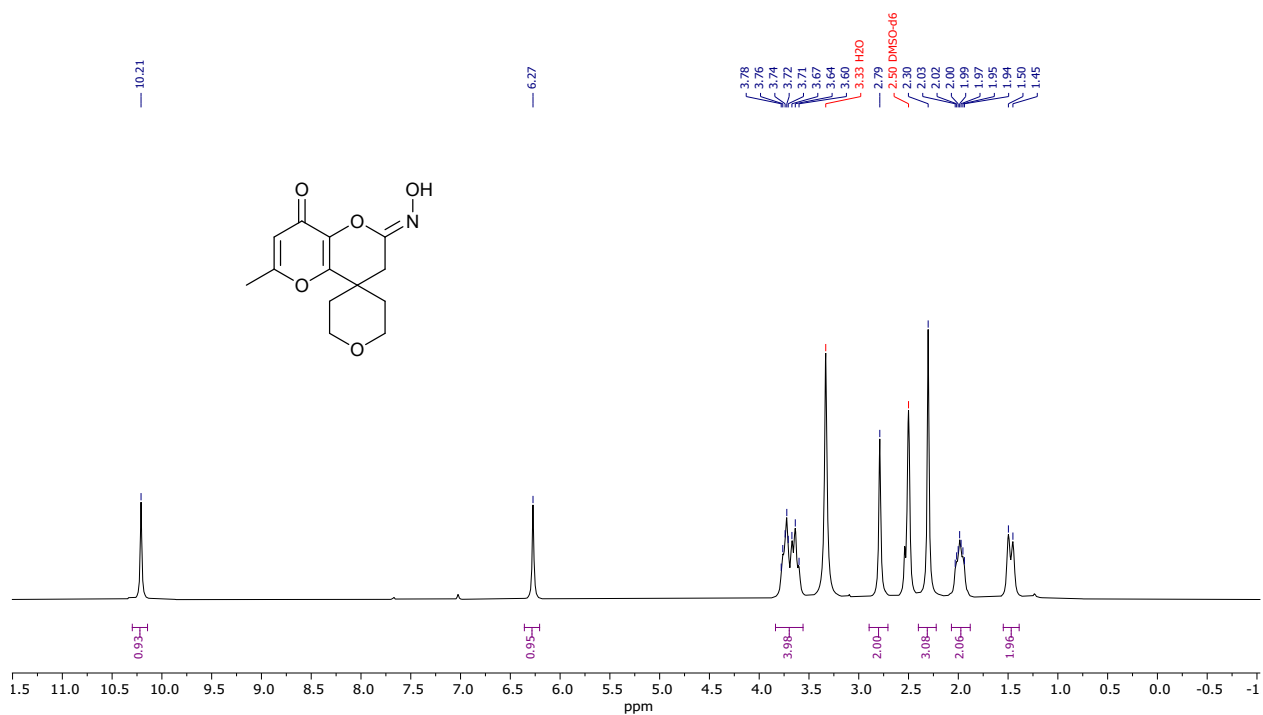

$^{13}\text{C}$   $\{^1\text{H}\}$  NMR spectrum (75 MHz) of **18b** in  $\text{DMSO-}d_6$

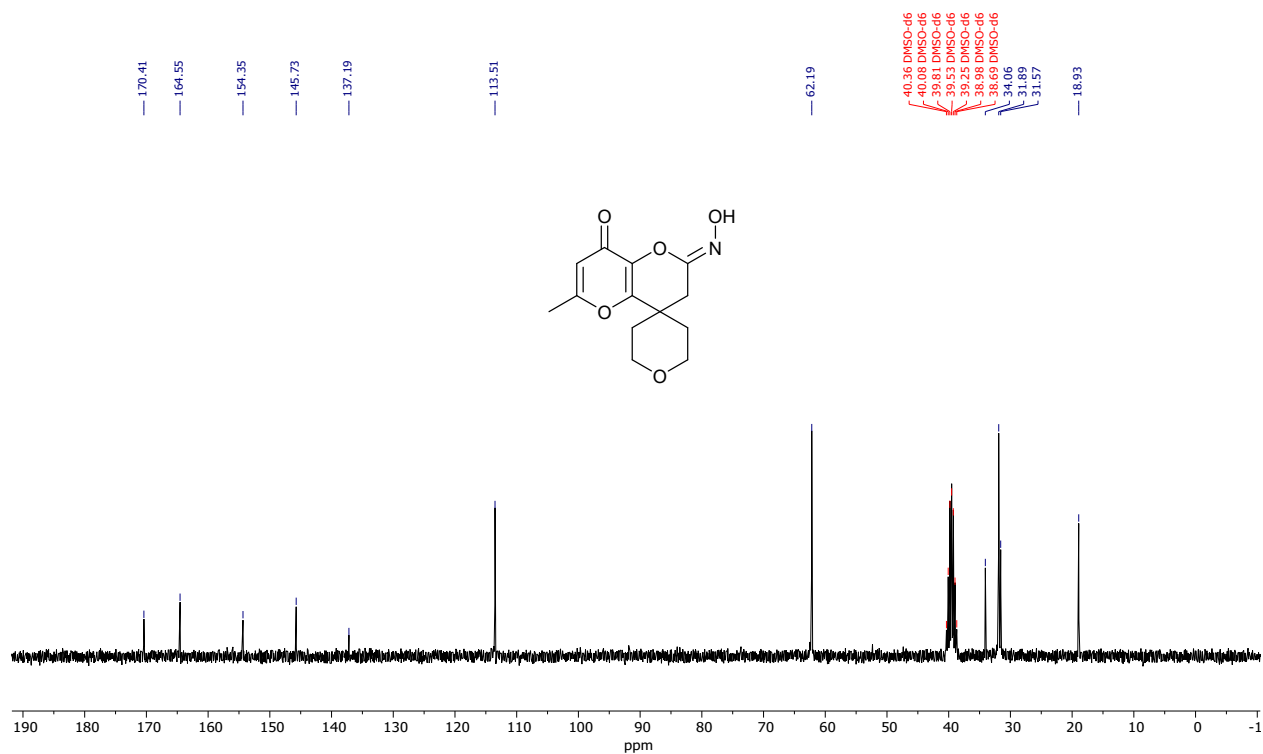



$^1\text{H}$  NMR spectrum (600 MHz) of **18c** in  $\text{DMSO-}d_6$

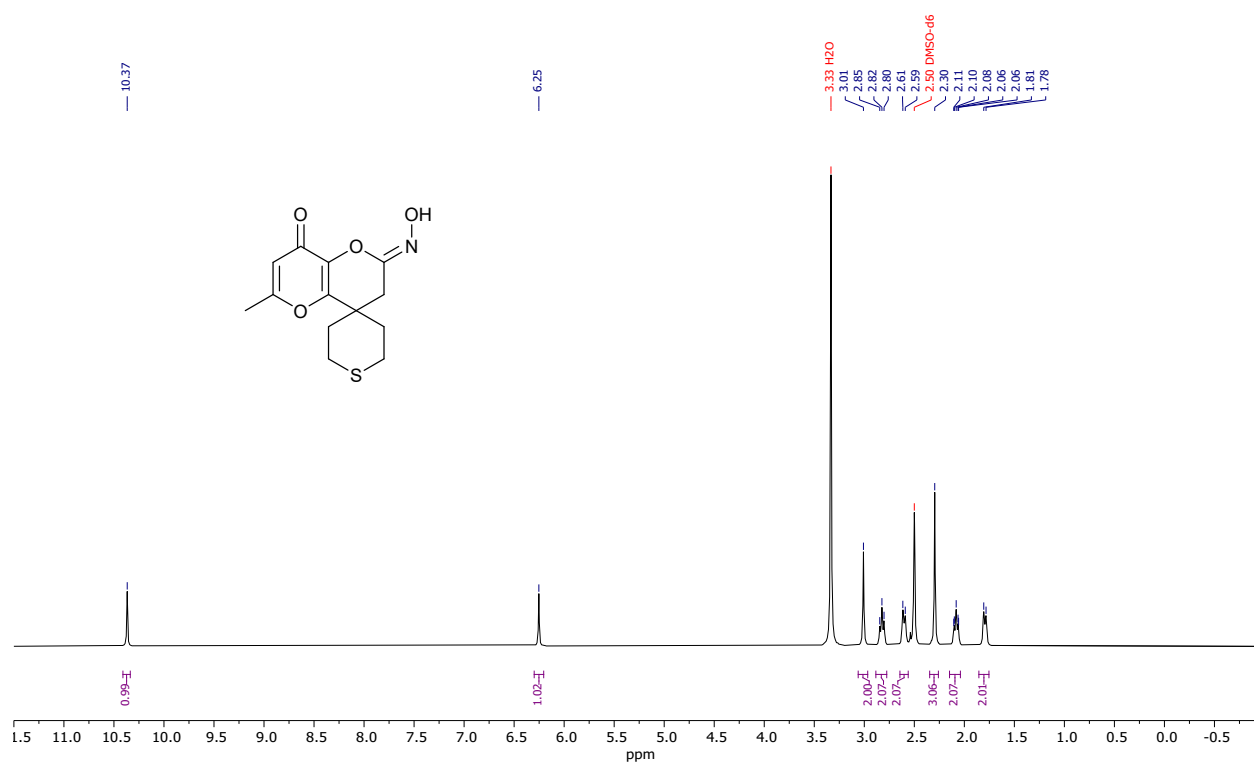

$^{13}\text{C}$   $\{^1\text{H}\}$  NMR spectrum (75 MHz) of **18c** in  $\text{DMSO-}d_6$

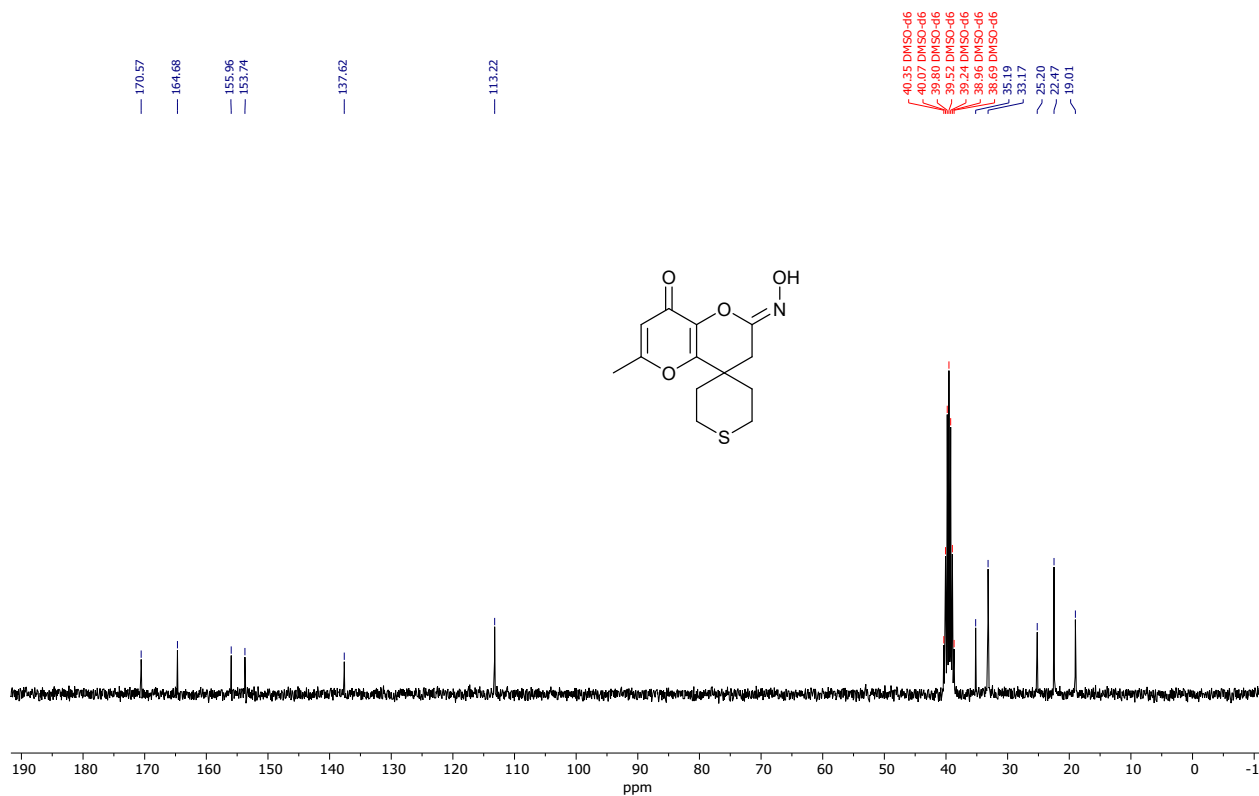





$^1\text{H}$  NMR spectrum (300 MHz) of **19** in  $\text{DMSO-}d_6$

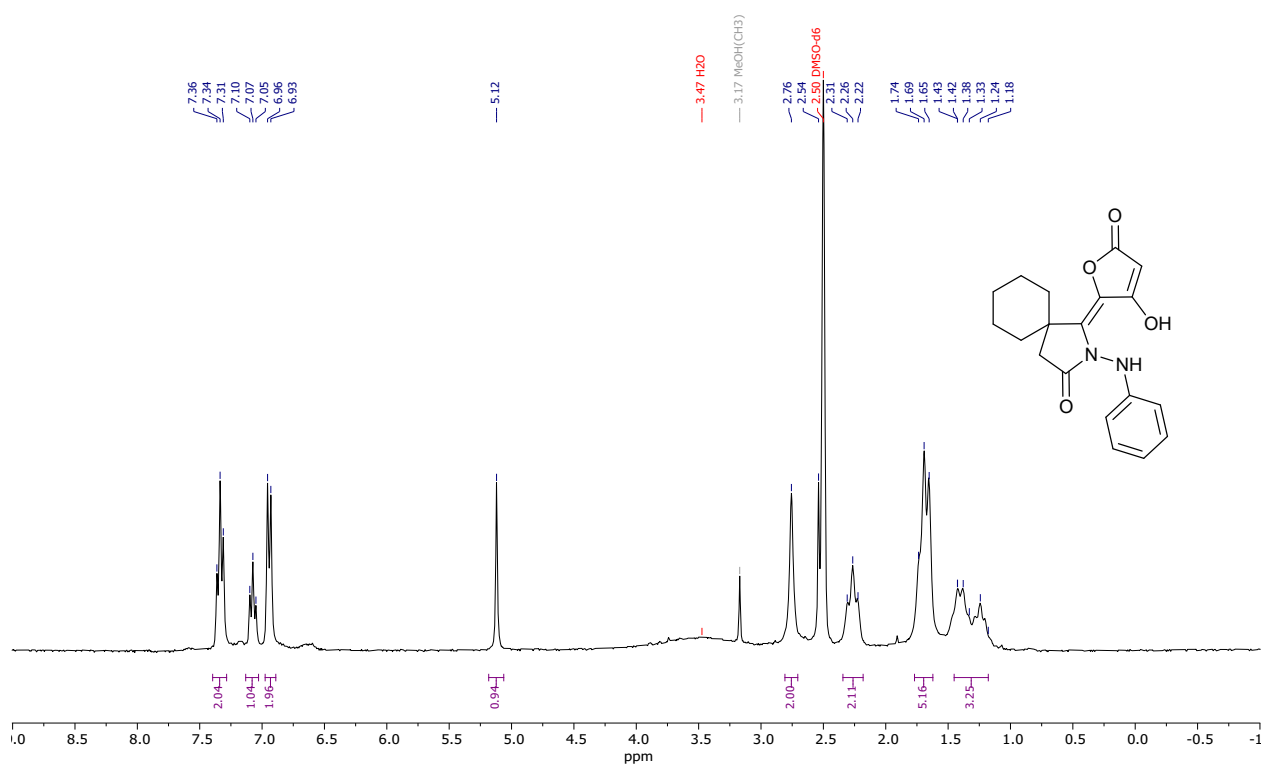

$^{13}\text{C}$   $\{^1\text{H}\}$  NMR spectrum (75 MHz) of **19** in  $\text{DMSO-}d_6$

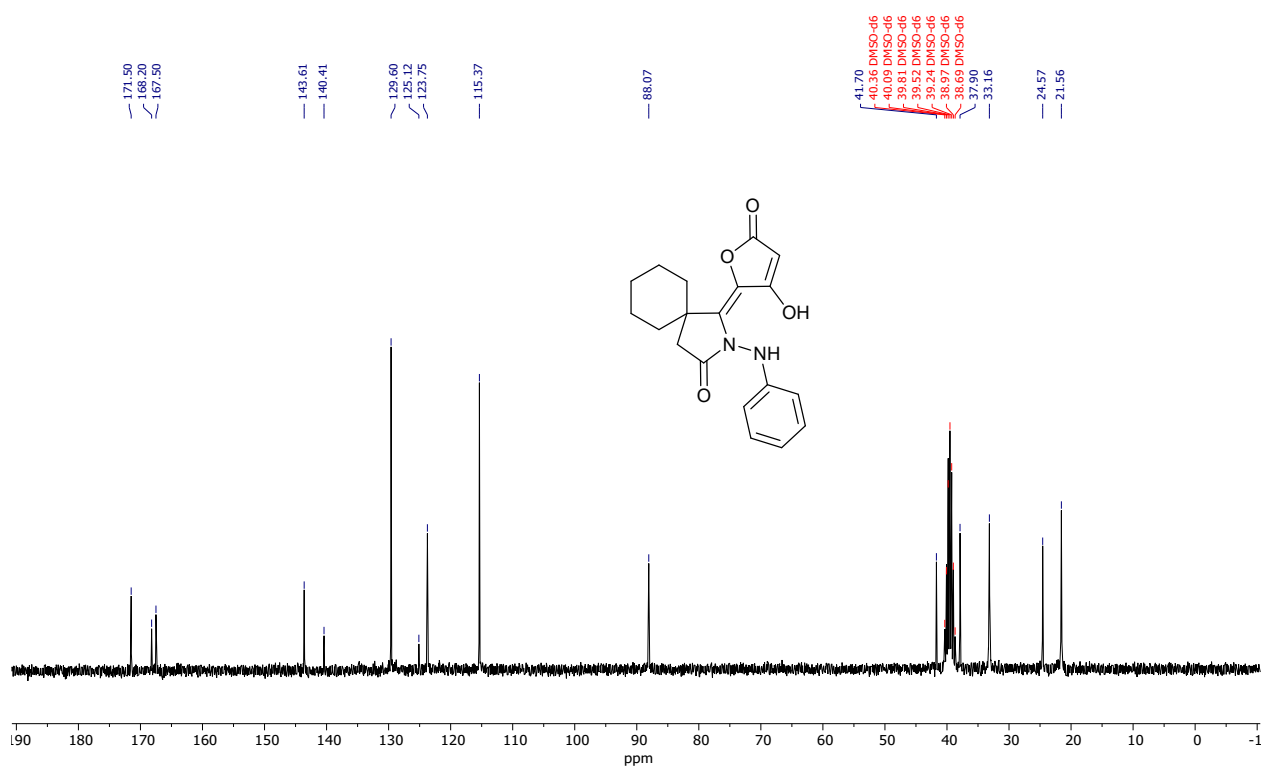

## 7. Copies of HRMS for all compounds

### HRMS for compound 7a

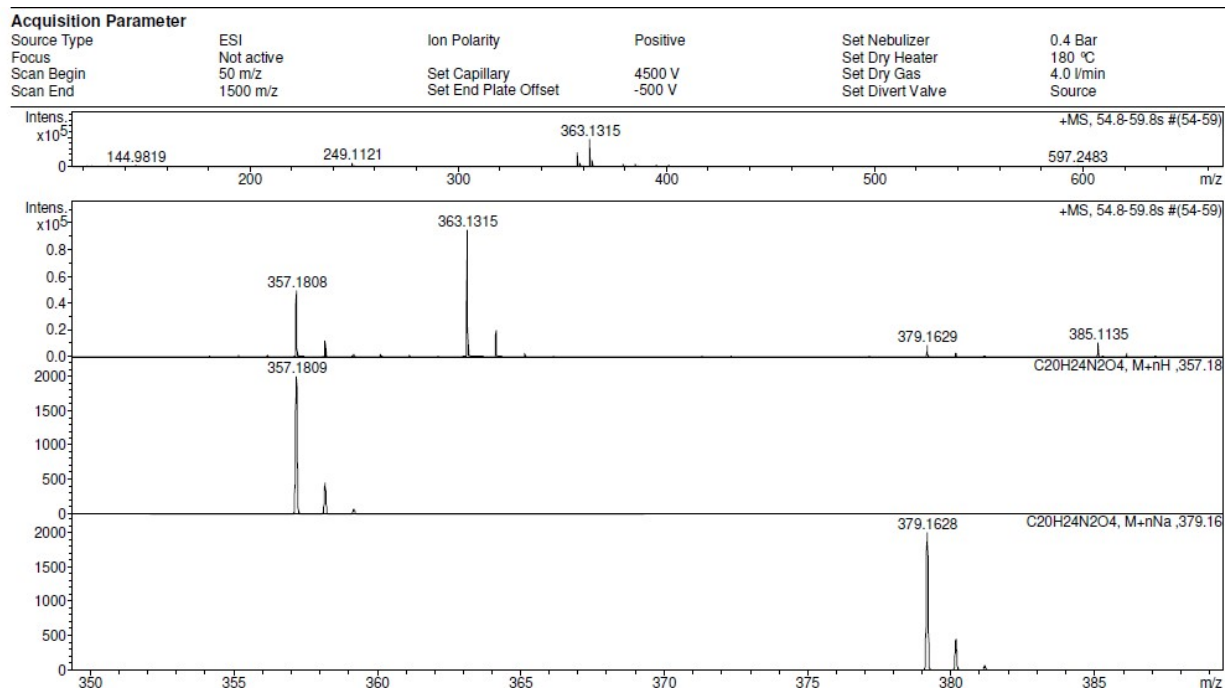

# HRMS for compound 7b

## Acquisition Parameter

|             |            |                      |          |                  |           |
|-------------|------------|----------------------|----------|------------------|-----------|
| Source Type | ESI        | Ion Polarity         | Positive | Set Nebulizer    | 0.4 Bar   |
| Focus       | Not active |                      |          | Set Dry Heater   | 180 °C    |
| Scan Begin  | 50 m/z     | Set Capillary        | 4500 V   | Set Dry Gas      | 4.0 l/min |
| Scan End    | 2500 m/z   | Set End Plate Offset | -500 V   | Set Divert Valve | Waste     |

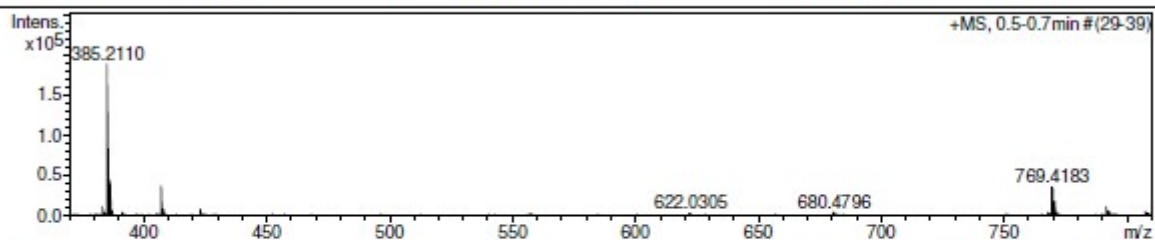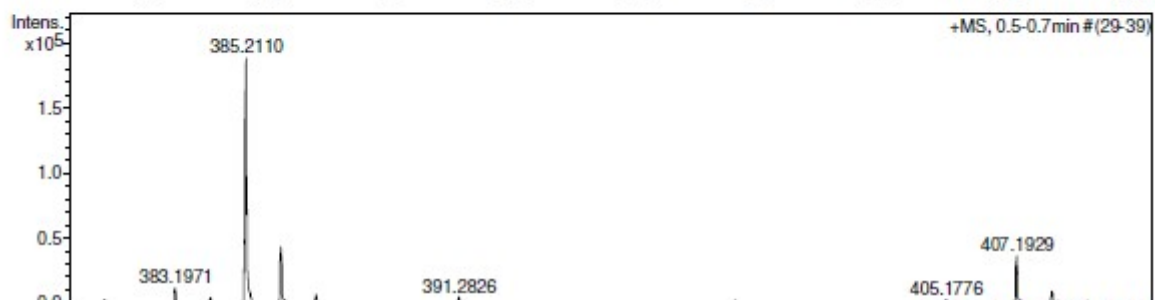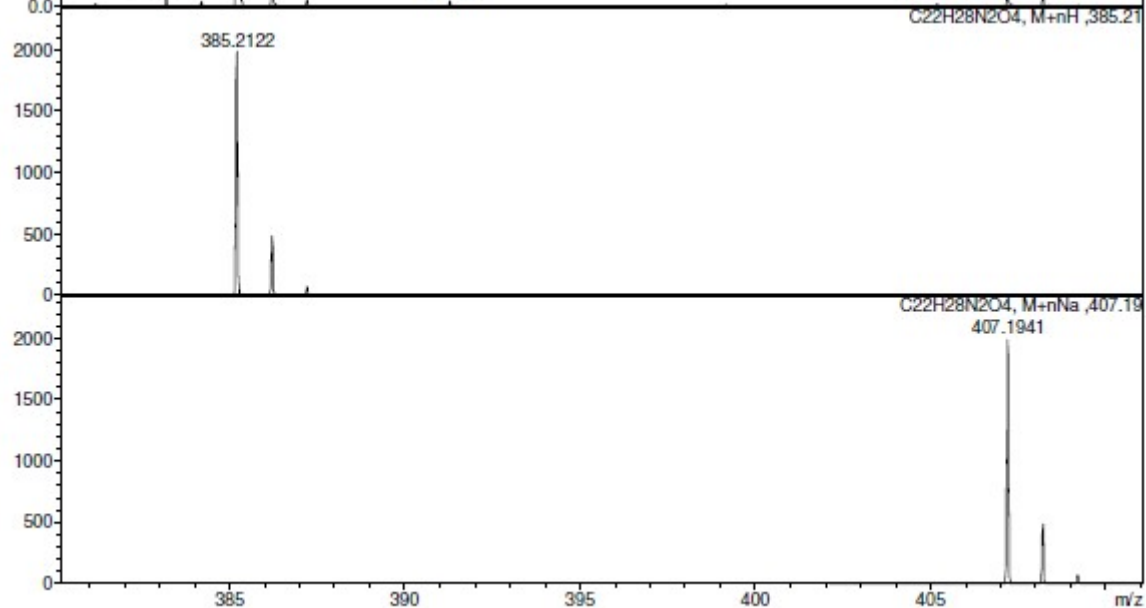

HRMS for compound 7c

Acquisition Parameter

|             |            |                      |          |                  |           |
|-------------|------------|----------------------|----------|------------------|-----------|
| Source Type | ESI        | Ion Polarity         | Positive | Set Nebulizer    | 0.4 Bar   |
| Focus       | Not active |                      |          | Set Dry Heater   | 180 °C    |
| Scan Begin  | 50 m/z     | Set Capillary        | 4500 V   | Set Dry Gas      | 4.0 l/min |
| Scan End    | 1500 m/z   | Set End Plate Offset | -500 V   | Set Divert Valve | Source    |

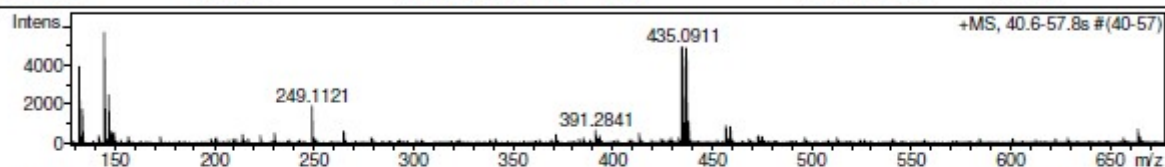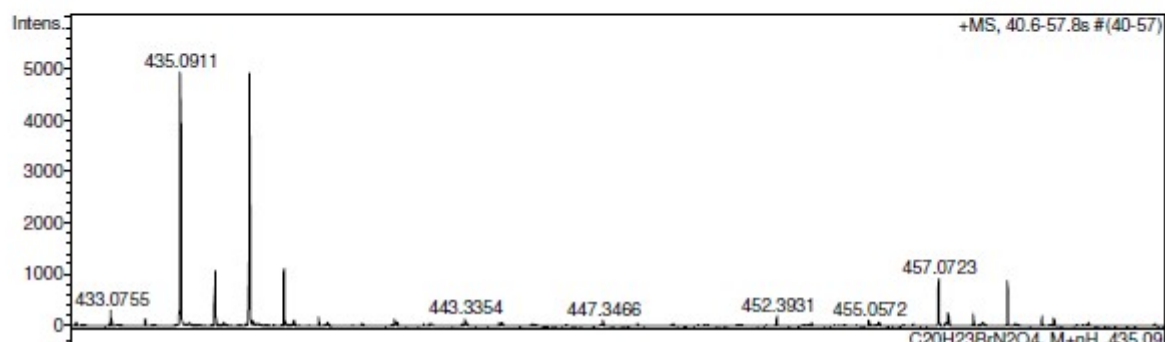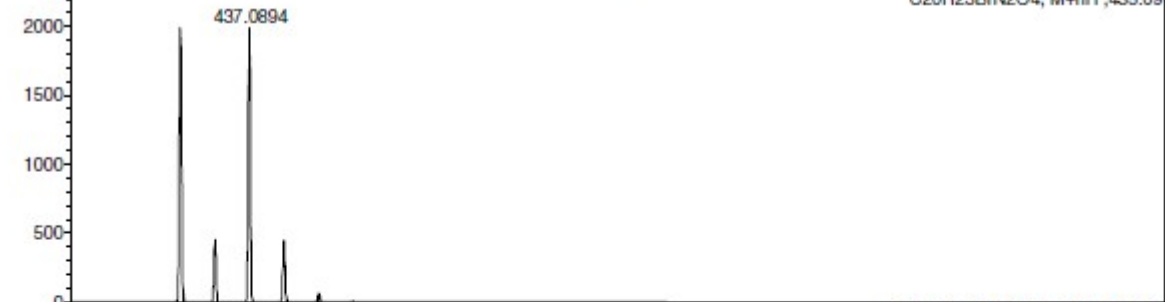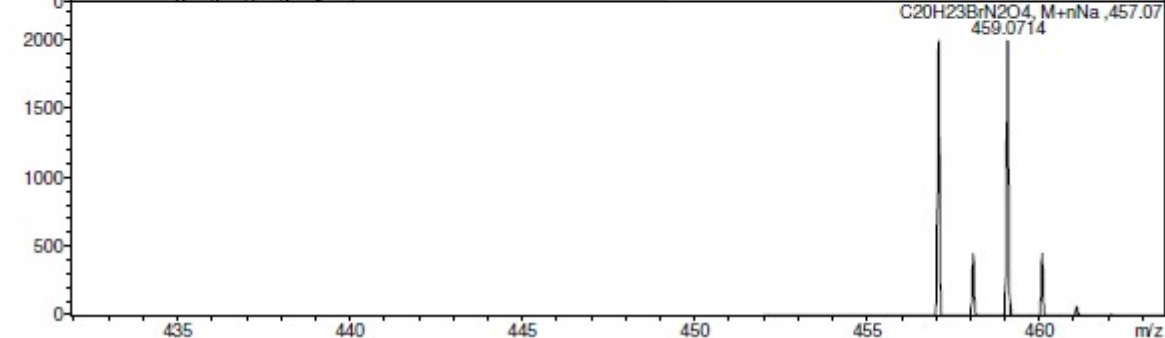

# HRMS for compound 7d

## Acquisition Parameter

|             |            |                      |          |                  |           |
|-------------|------------|----------------------|----------|------------------|-----------|
| Source Type | ESI        | Ion Polarity         | Positive | Set Nebulizer    | 0.4 Bar   |
| Focus       | Not active |                      |          | Set Dry Heater   | 180 °C    |
| Scan Begin  | 50 m/z     | Set Capillary        | 4500 V   | Set Dry Gas      | 4.0 l/min |
| Scan End    | 1500 m/z   | Set End Plate Offset | -500 V   | Set Divert Valve | Source    |

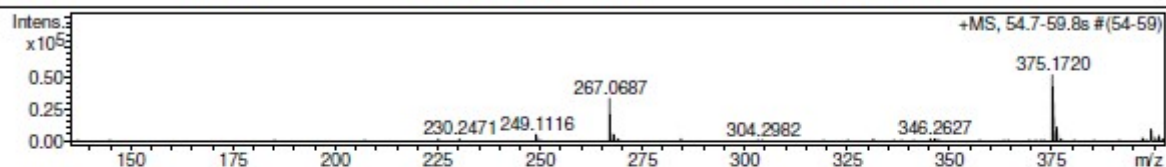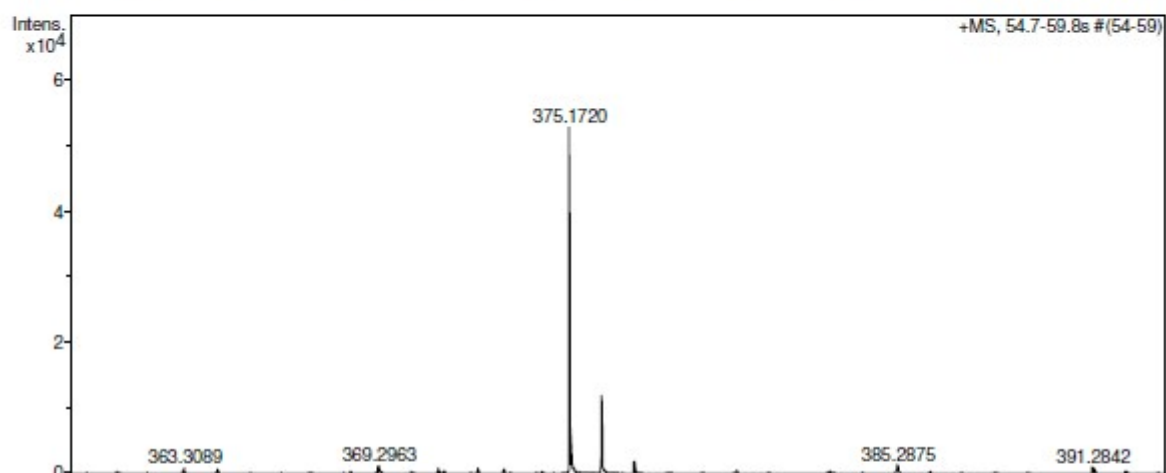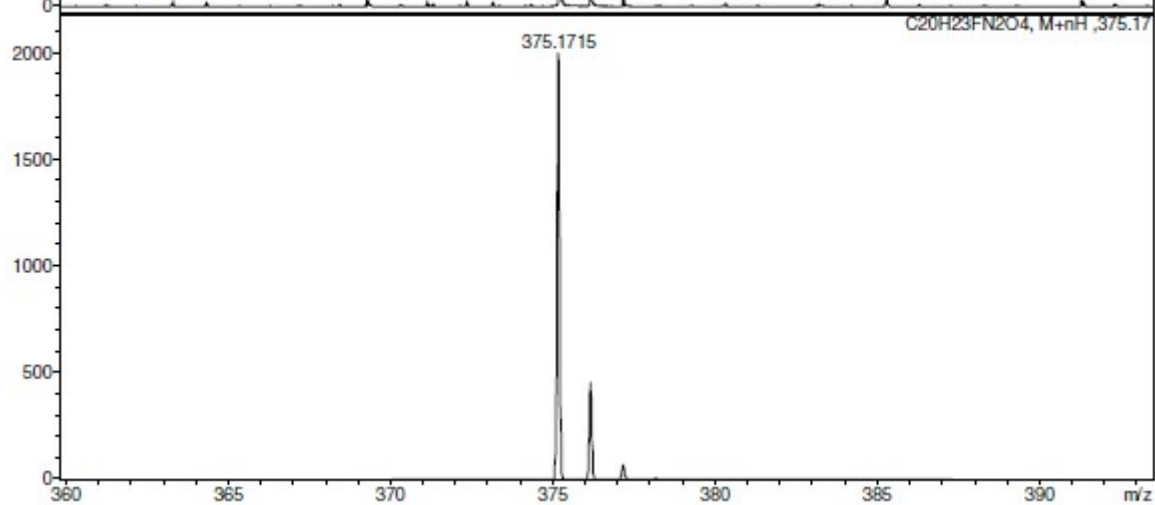

HRMS for compound 7e

Acquisition Parameter

|             |            |                      |          |                  |           |
|-------------|------------|----------------------|----------|------------------|-----------|
| Source Type | ESI        | Ion Polarity         | Positive | Set Nebulizer    | 0.4 Bar   |
| Focus       | Not active |                      |          | Set Dry Heater   | 180 °C    |
| Scan Begin  | 50 m/z     | Set Capillary        | 4500 V   | Set Dry Gas      | 4.0 l/min |
| Scan End    | 3000 m/z   | Set End Plate Offset | -500 V   | Set Divert Valve | Waste     |

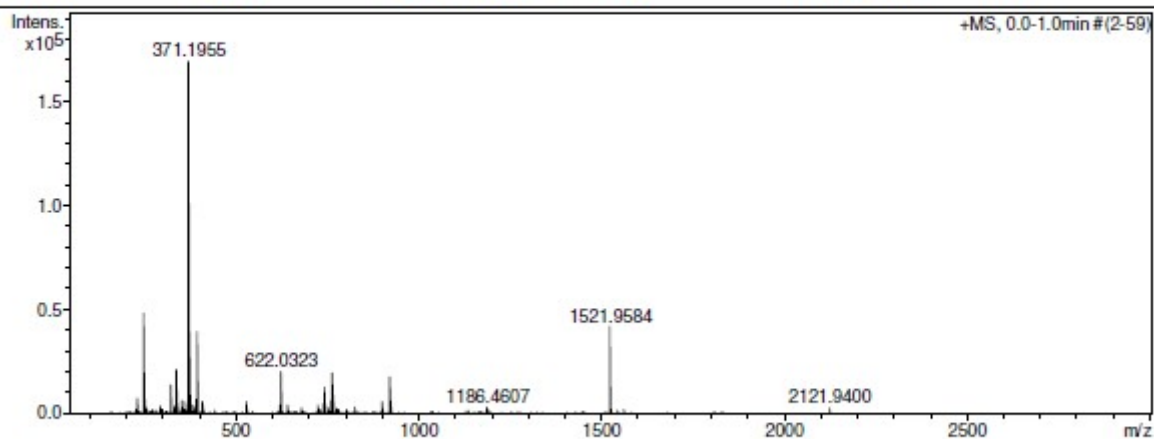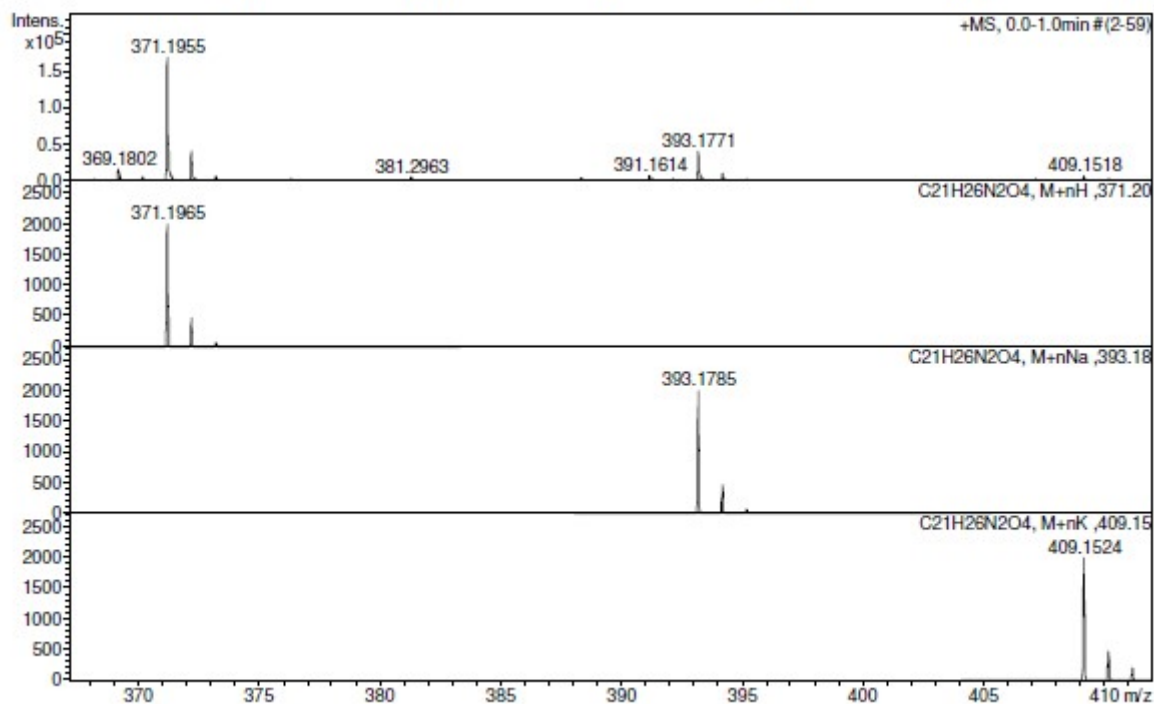

HRMS for compound **7f**

**Acquisition Parameter**

|             |            |                      |          |                  |           |
|-------------|------------|----------------------|----------|------------------|-----------|
| Source Type | ESI        | Ion Polarity         | Positive | Set Nebulizer    | 0.4 Bar   |
| Focus       | Not active |                      |          | Set Dry Heater   | 180 °C    |
| Scan Begin  | 50 m/z     | Set Capillary        | 4500 V   | Set Dry Gas      | 4.0 l/min |
| Scan End    | 1500 m/z   | Set End Plate Offset | -500 V   | Set Divert Valve | Source    |

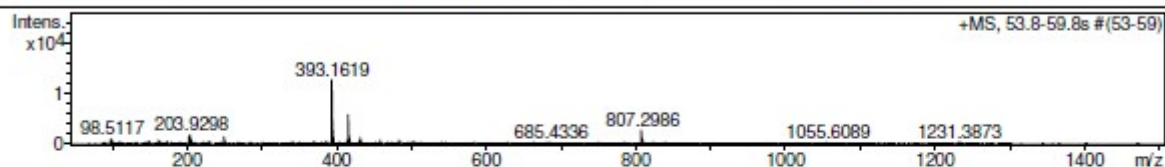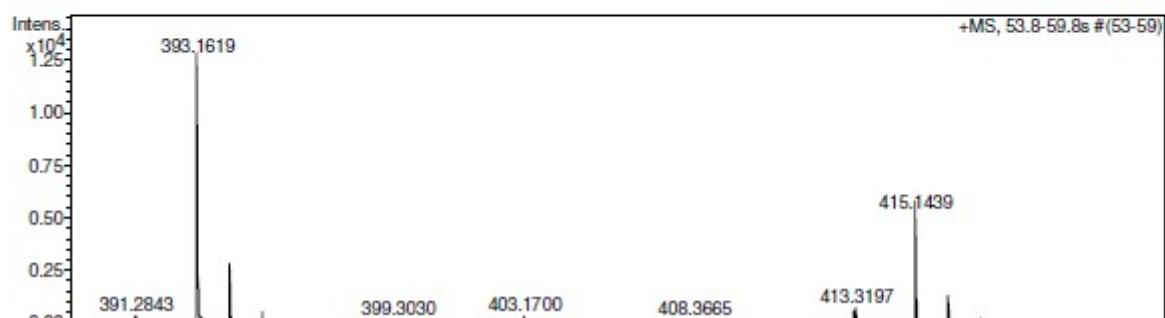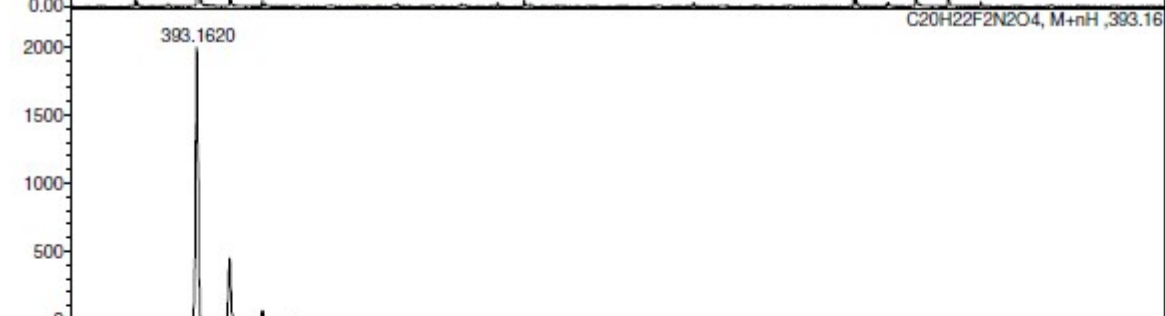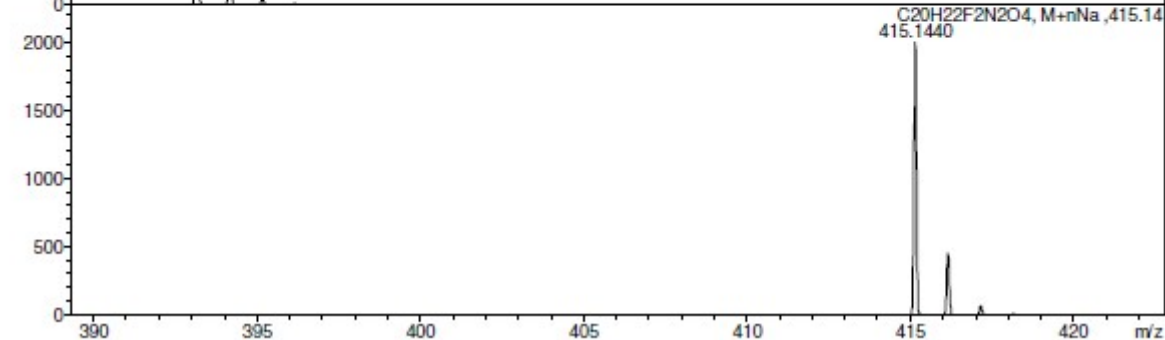



# HRMS for compound 7g

## Acquisition Parameter

|             |            |                      |          |                  |           |
|-------------|------------|----------------------|----------|------------------|-----------|
| Source Type | ESI        | Ion Polarity         | Positive | Set Nebulizer    | 0.4 Bar   |
| Focus       | Not active |                      |          | Set Dry Heater   | 180 °C    |
| Scan Begin  | 50 m/z     | Set Capillary        | 4500 V   | Set Dry Gas      | 4.0 l/min |
| Scan End    | 2500 m/z   | Set End Plate Offset | -500 V   | Set Divert Valve | Waste     |

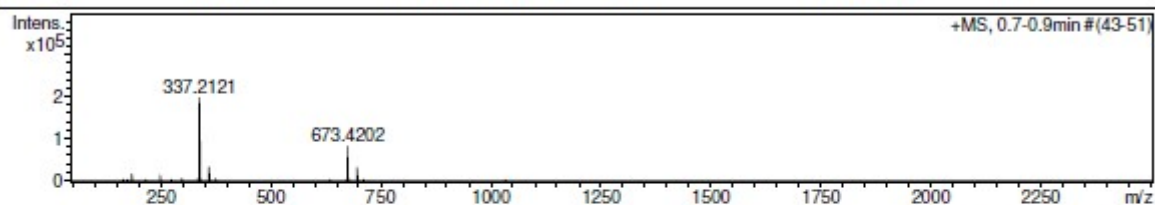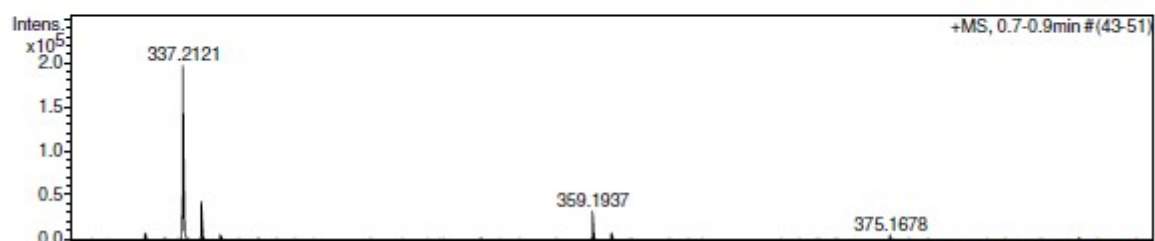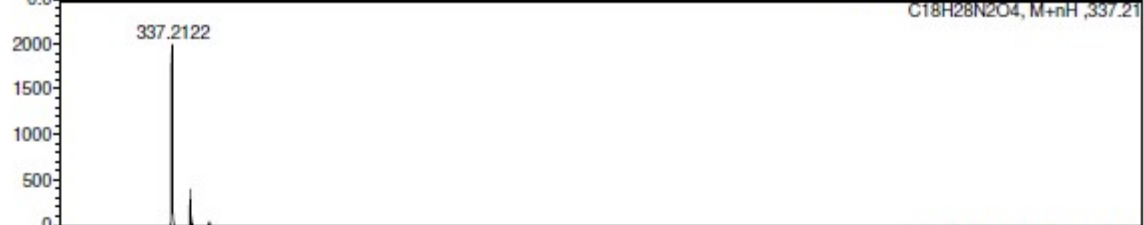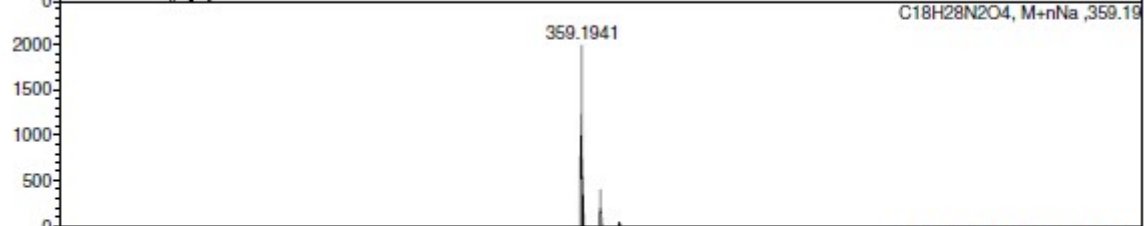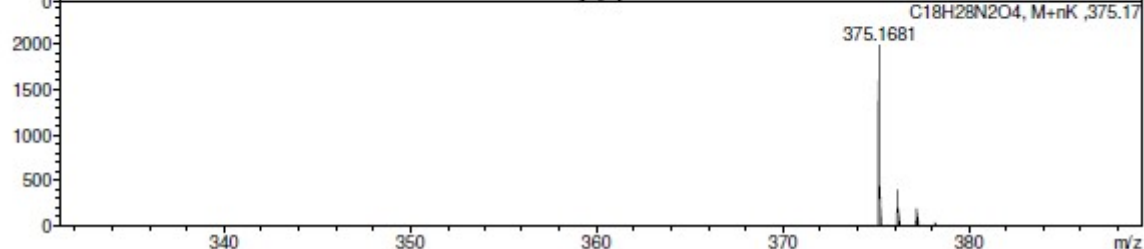

# HRMS for compound 7h

## Acquisition Parameter

|             |            |                      |          |                  |           |
|-------------|------------|----------------------|----------|------------------|-----------|
| Source Type | ESI        | Ion Polarity         | Positive | Set Nebulizer    | 0.4 Bar   |
| Focus       | Not active |                      |          | Set Dry Heater   | 180 °C    |
| Scan Begin  | 50 m/z     | Set Capillary        | 4500 V   | Set Dry Gas      | 4.0 l/min |
| Scan End    | 3000 m/z   | Set End Plate Offset | -500 V   | Set Divert Valve | Waste     |

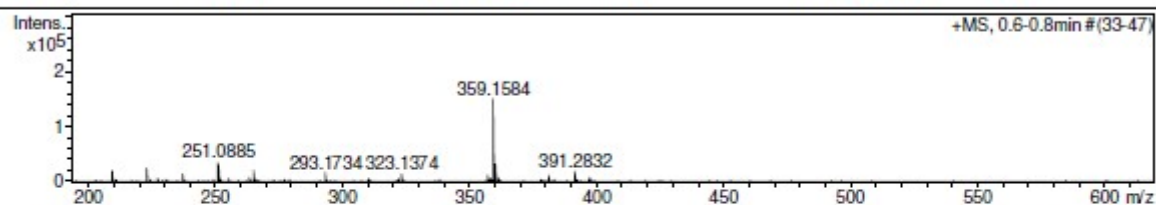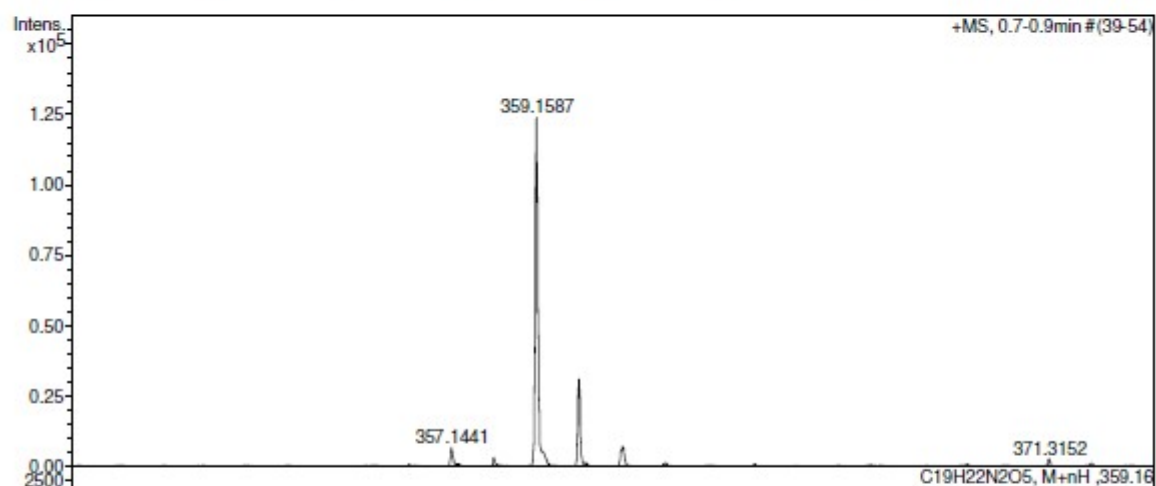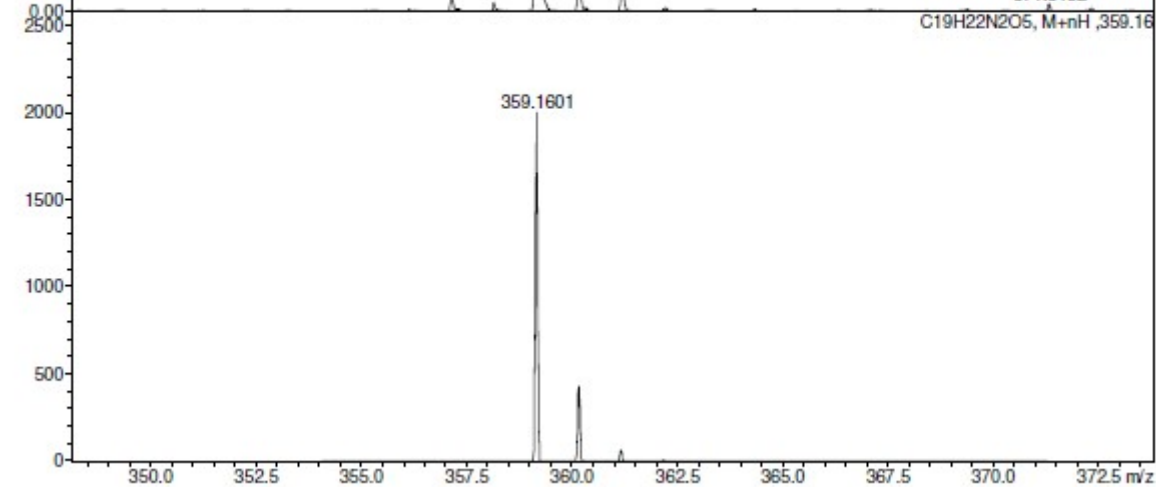

# HRMS for compound 7i

## Acquisition Parameter

|             |            |                      |          |                  |           |
|-------------|------------|----------------------|----------|------------------|-----------|
| Source Type | ESI        | Ion Polarity         | Positive | Set Nebulizer    | 0.4 Bar   |
| Focus       | Not active |                      |          | Set Dry Heater   | 180 °C    |
| Scan Begin  | 50 m/z     | Set Capillary        | 4500 V   | Set Dry Gas      | 4.0 l/min |
| Scan End    | 3000 m/z   | Set End Plate Offset | -500 V   | Set Divert Valve | Waste     |

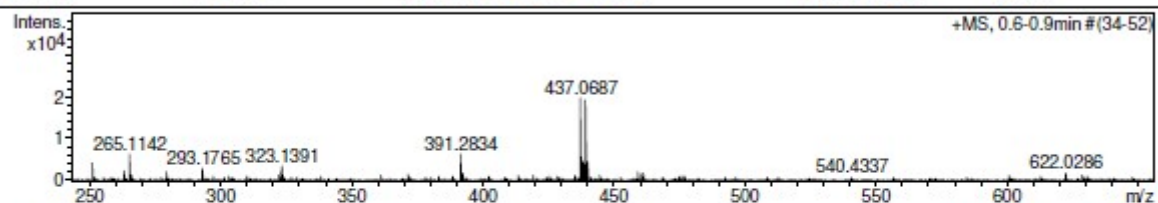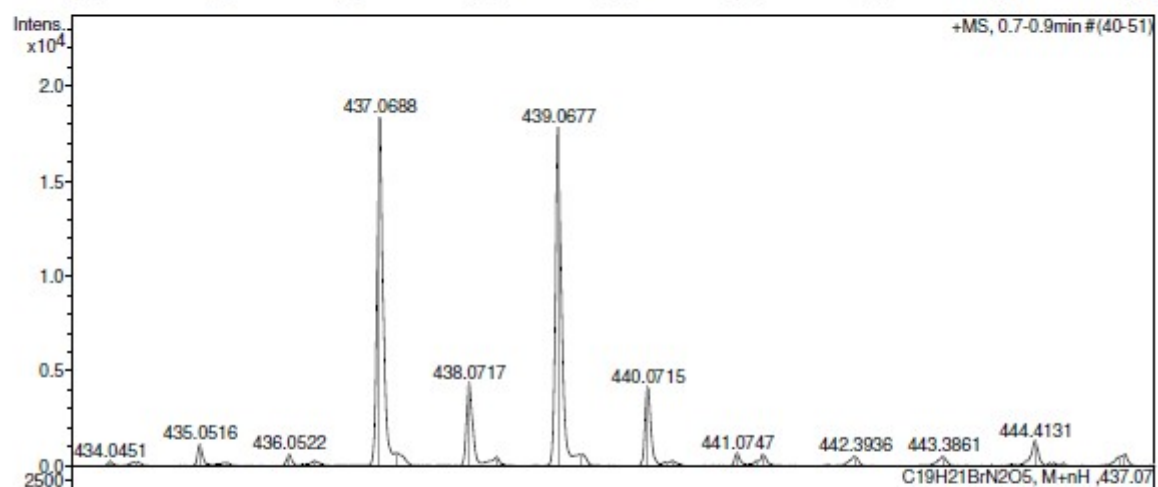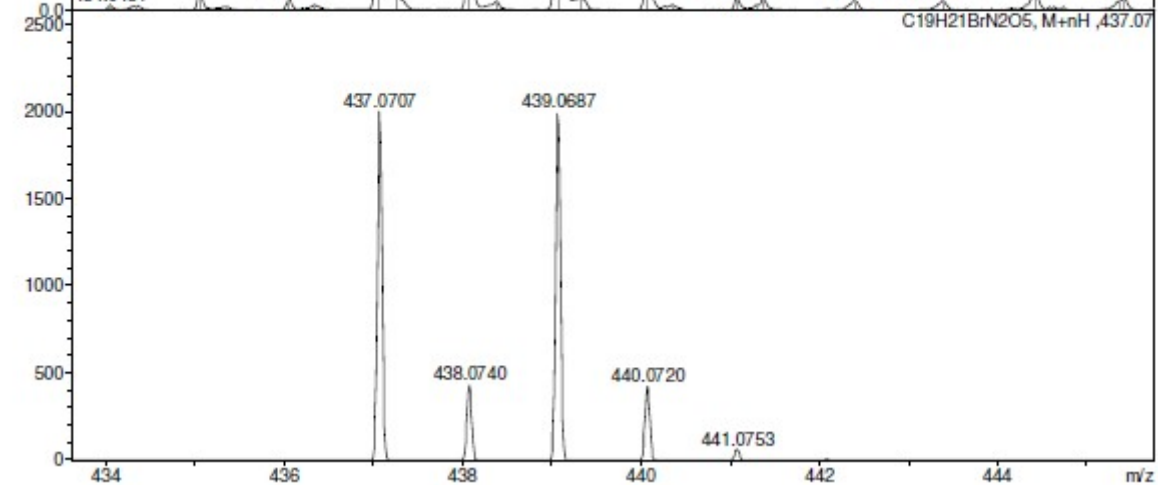

HRMS for compound 7j

Acquisition Parameter

|             |            |                      |          |                  |           |
|-------------|------------|----------------------|----------|------------------|-----------|
| Source Type | ESI        | Ion Polarity         | Positive | Set Nebulizer    | 0.4 Bar   |
| Focus       | Not active |                      |          | Set Dry Heater   | 180 °C    |
| Scan Begin  | 50 m/z     | Set Capillary        | 4500 V   | Set Dry Gas      | 4.0 l/min |
| Scan End    | 3000 m/z   | Set End Plate Offset | -500 V   | Set Divert Valve | Waste     |

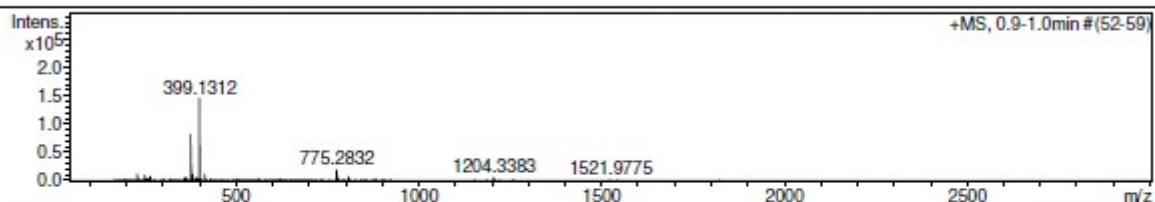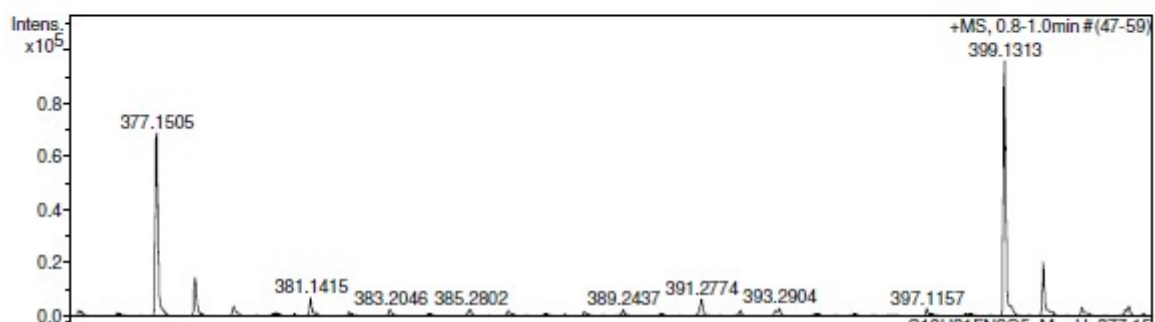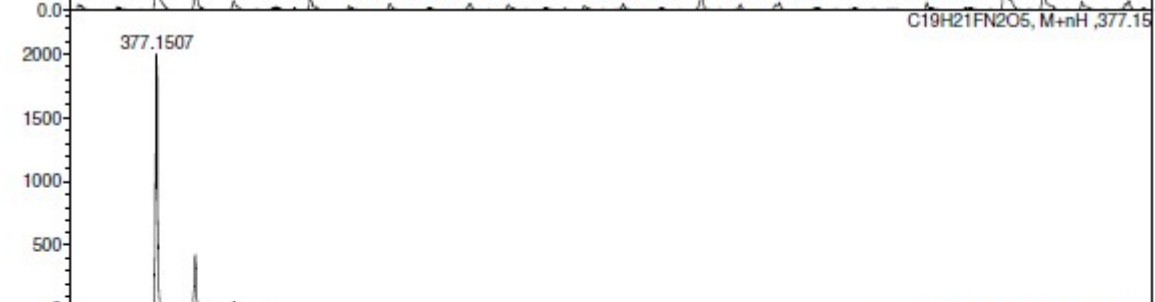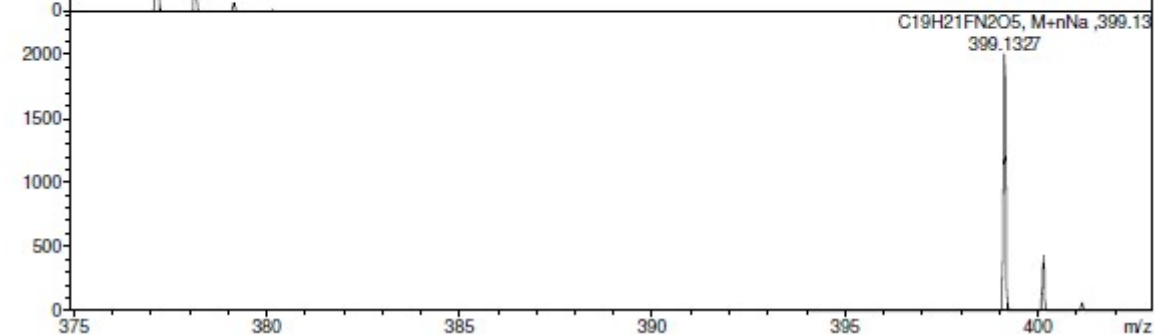

# HRMS for compound 7k

## Acquisition Parameter

|             |            |                      |          |                  |           |
|-------------|------------|----------------------|----------|------------------|-----------|
| Source Type | ESI        | Ion Polarity         | Positive | Set Nebulizer    | 0.4 Bar   |
| Focus       | Not active |                      |          | Set Dry Heater   | 180 °C    |
| Scan Begin  | 50 m/z     | Set Capillary        | 4500 V   | Set Dry Gas      | 4.0 l/min |
| Scan End    | 2500 m/z   | Set End Plate Offset | -500 V   | Set Divert Valve | Waste     |

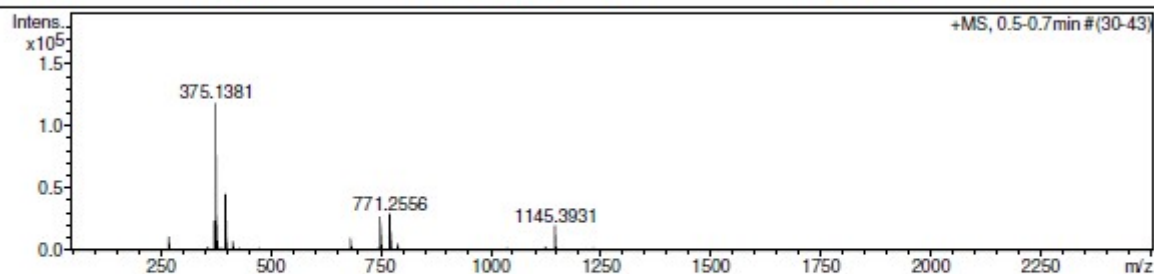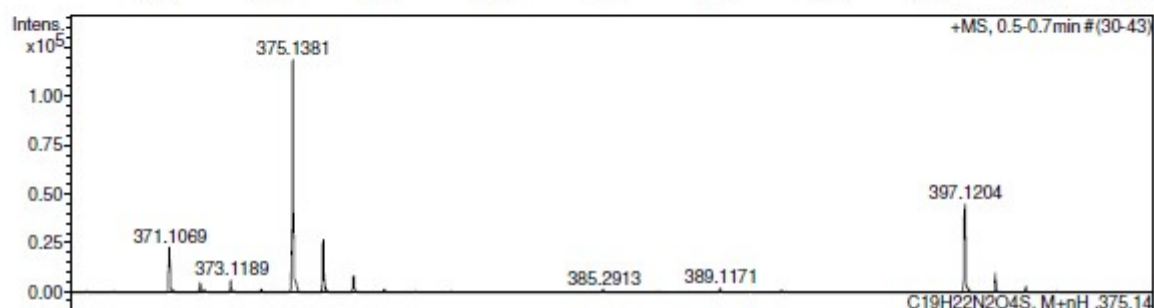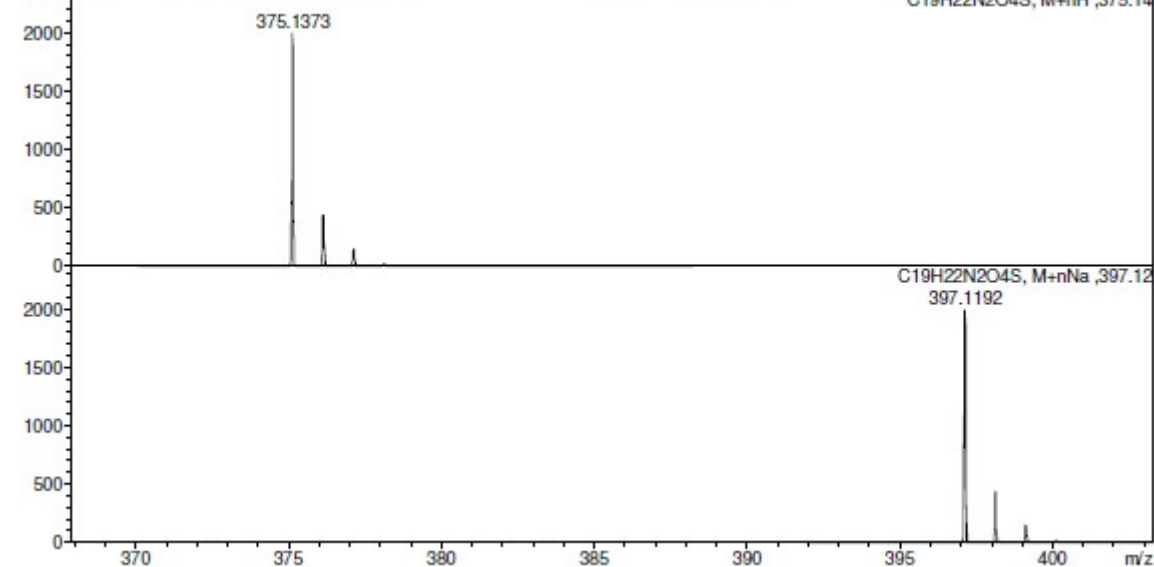

# HRMS for compound 71

## Acquisition Parameter

|             |            |                      |          |                  |           |
|-------------|------------|----------------------|----------|------------------|-----------|
| Source Type | ESI        | Ion Polarity         | Positive | Set Nebulizer    | 0.4 Bar   |
| Focus       | Not active |                      |          | Set Dry Heater   | 180 °C    |
| Scan Begin  | 50 m/z     | Set Capillary        | 4500 V   | Set Dry Gas      | 4.0 l/min |
| Scan End    | 1500 m/z   | Set End Plate Offset | -500 V   | Set Divert Valve | Source    |

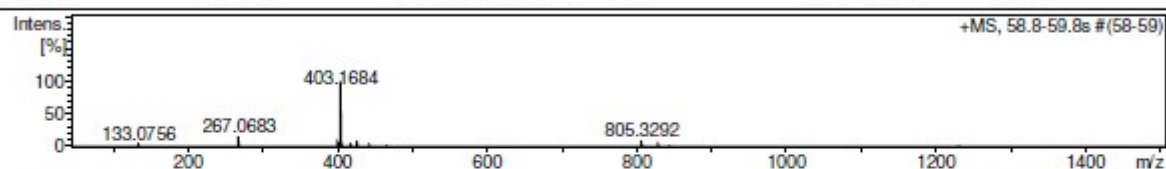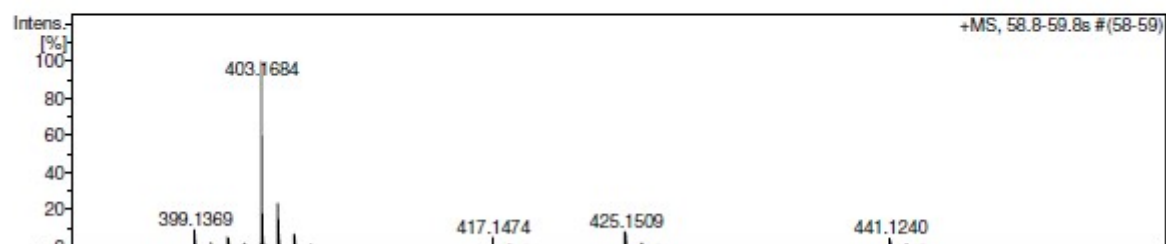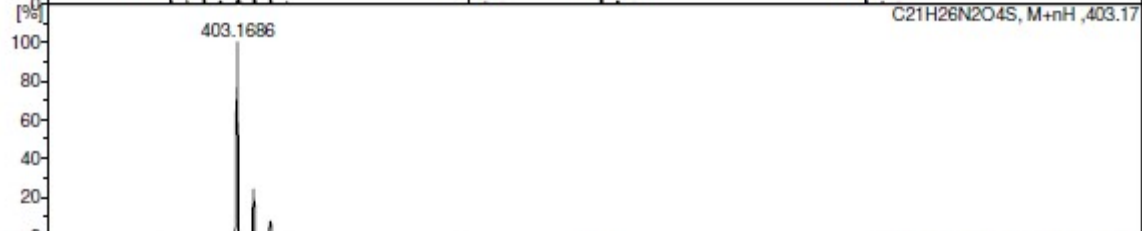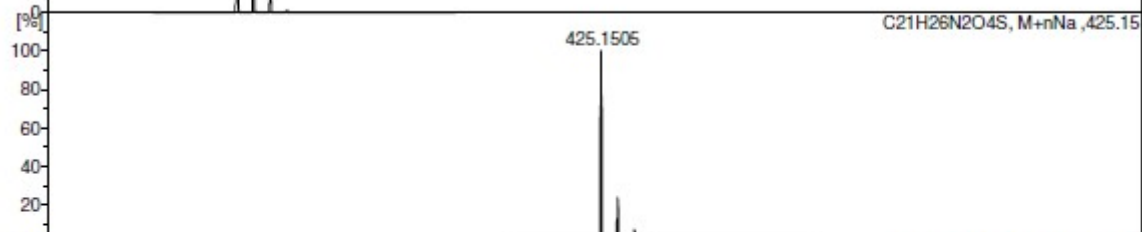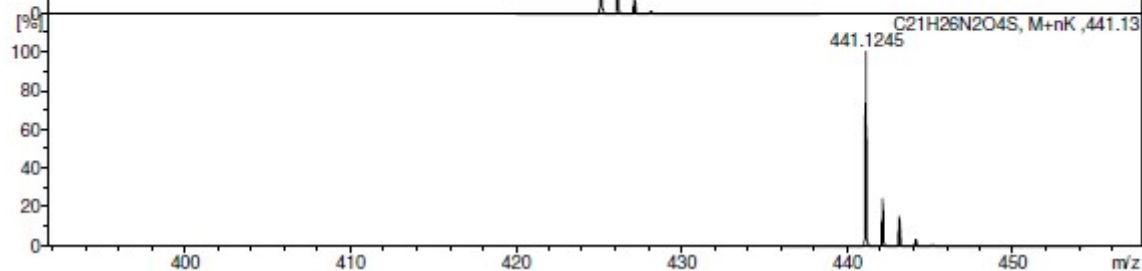

# HRMS for compound 7m

## Acquisition Parameter

|             |            |                      |          |                  |           |
|-------------|------------|----------------------|----------|------------------|-----------|
| Source Type | ESI        | Ion Polarity         | Positive | Set Nebulizer    | 0.4 Bar   |
| Focus       | Not active |                      |          | Set Dry Heater   | 180 °C    |
| Scan Begin  | 50 m/z     | Set Capillary        | 4500 V   | Set Dry Gas      | 4.0 l/min |
| Scan End    | 2500 m/z   | Set End Plate Offset | -500 V   | Set Divert Valve | Waste     |

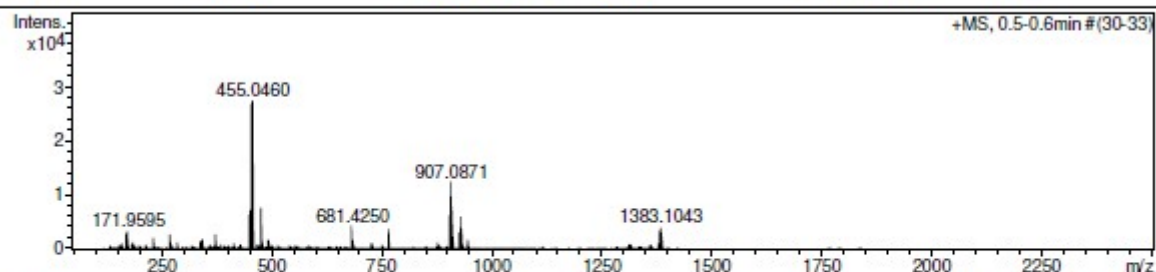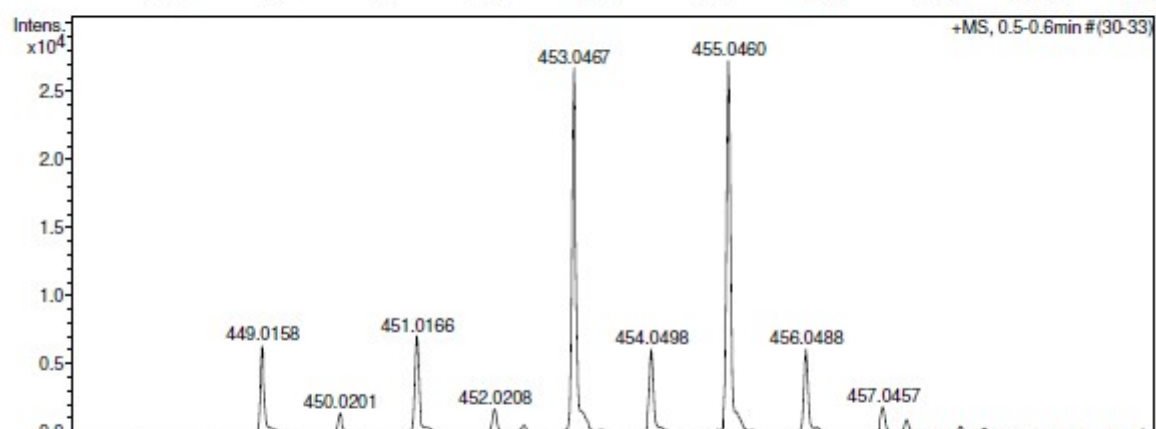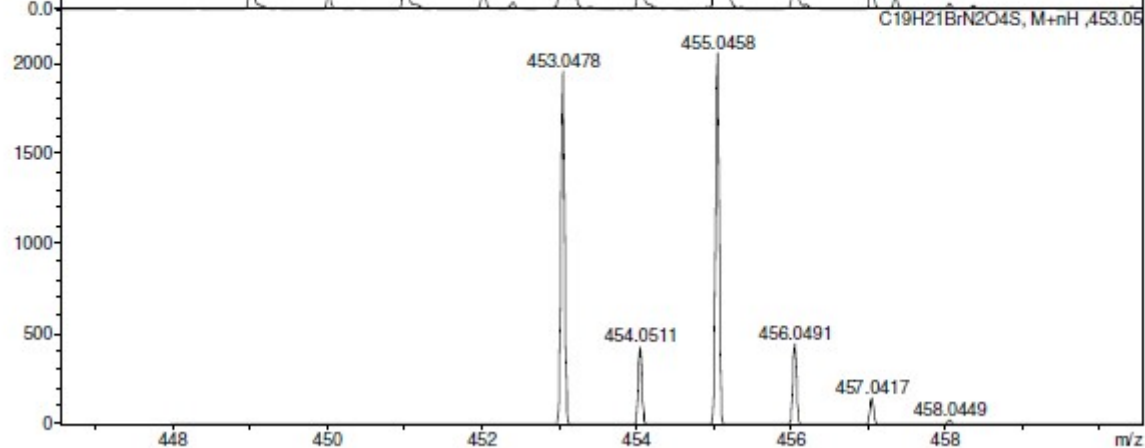

# HRMS for compound 7n

## Acquisition Parameter

|             |            |                      |          |                  |           |
|-------------|------------|----------------------|----------|------------------|-----------|
| Source Type | ESI        | Ion Polarity         | Positive | Set Nebulizer    | 0.4 Bar   |
| Focus       | Not active |                      |          | Set Dry Heater   | 180 °C    |
| Scan Begin  | 50 m/z     | Set Capillary        | 4500 V   | Set Dry Gas      | 4.0 l/min |
| Scan End    | 2500 m/z   | Set End Plate Offset | -500 V   | Set Divert Valve | Waste     |

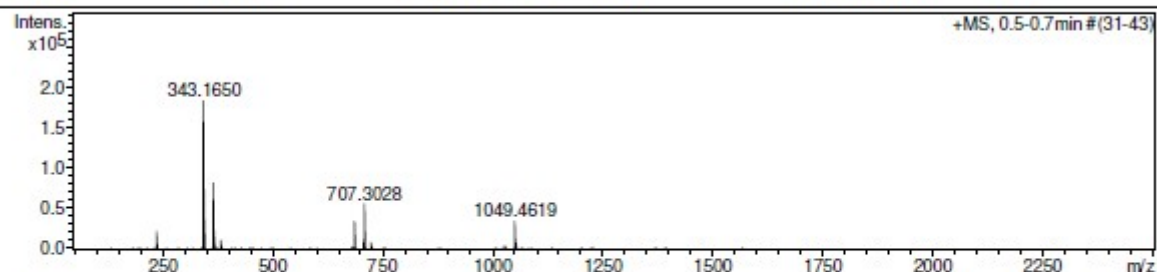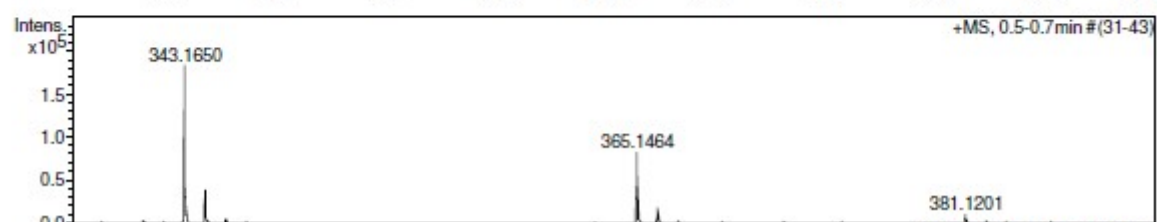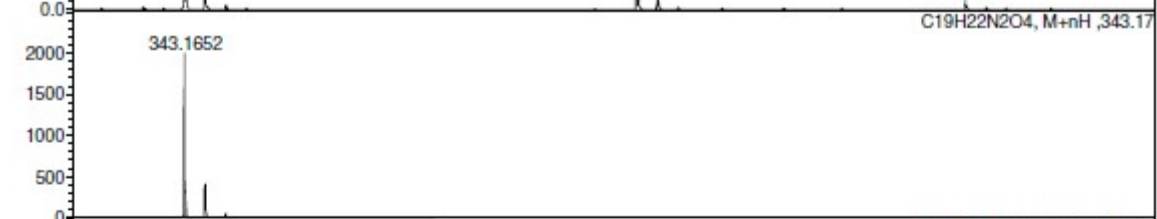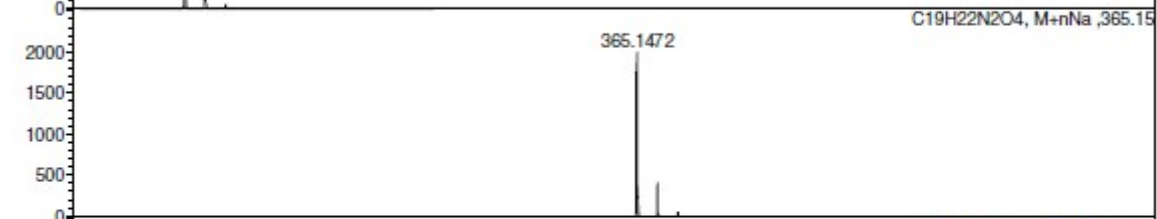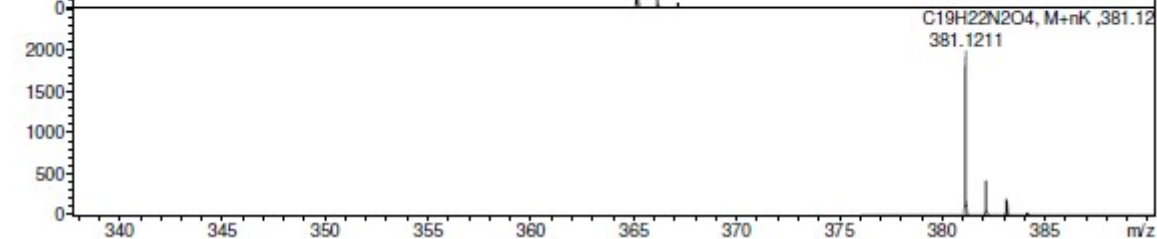



# HRMS for compound 7o

## Acquisition Parameter

|             |            |                      |          |                  |           |
|-------------|------------|----------------------|----------|------------------|-----------|
| Source Type | ESI        | Ion Polarity         | Positive | Set Nebulizer    | 0.4 Bar   |
| Focus       | Not active |                      |          | Set Dry Heater   | 180 °C    |
| Scan Begin  | 50 m/z     | Set Capillary        | 4500 V   | Set Dry Gas      | 4.0 l/min |
| Scan End    | 2500 m/z   | Set End Plate Offset | -500 V   | Set Divert Valve | Waste     |

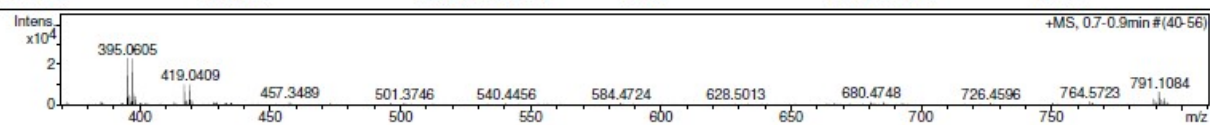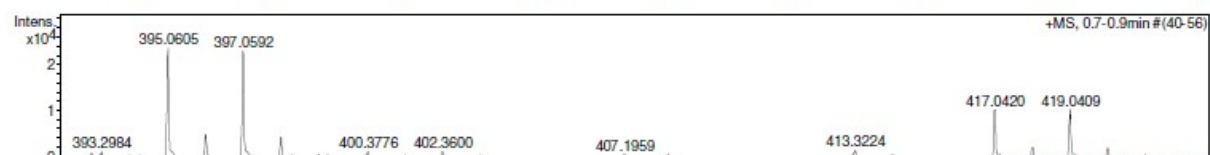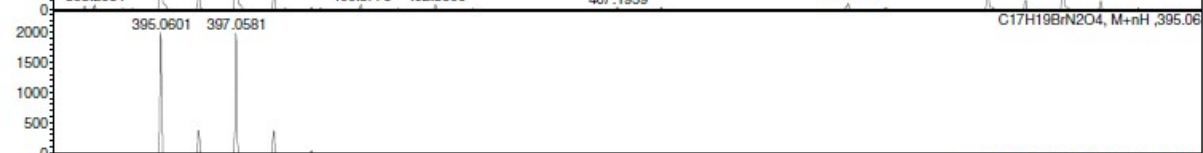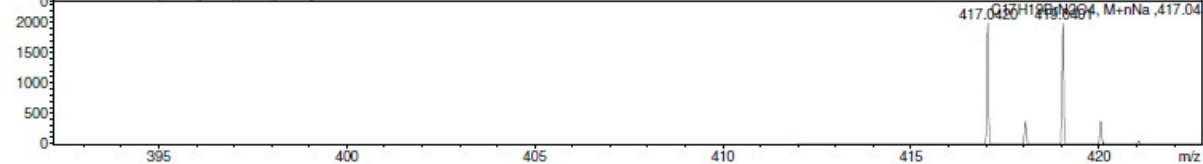

HRMS for compound **7p**

**Acquisition Parameter**

|             |            |                      |          |                  |           |
|-------------|------------|----------------------|----------|------------------|-----------|
| Source Type | ESI        | Ion Polarity         | Positive | Set Nebulizer    | 0.4 Bar   |
| Focus       | Not active |                      |          | Set Dry Heater   | 180 °C    |
| Scan Begin  | 50 m/z     | Set Capillary        | 4500 V   | Set Dry Gas      | 4.0 l/min |
| Scan End    | 3000 m/z   | Set End Plate Offset | -500 V   | Set Divert Valve | Waste     |

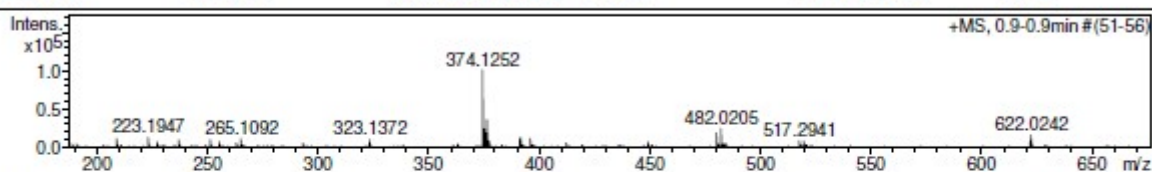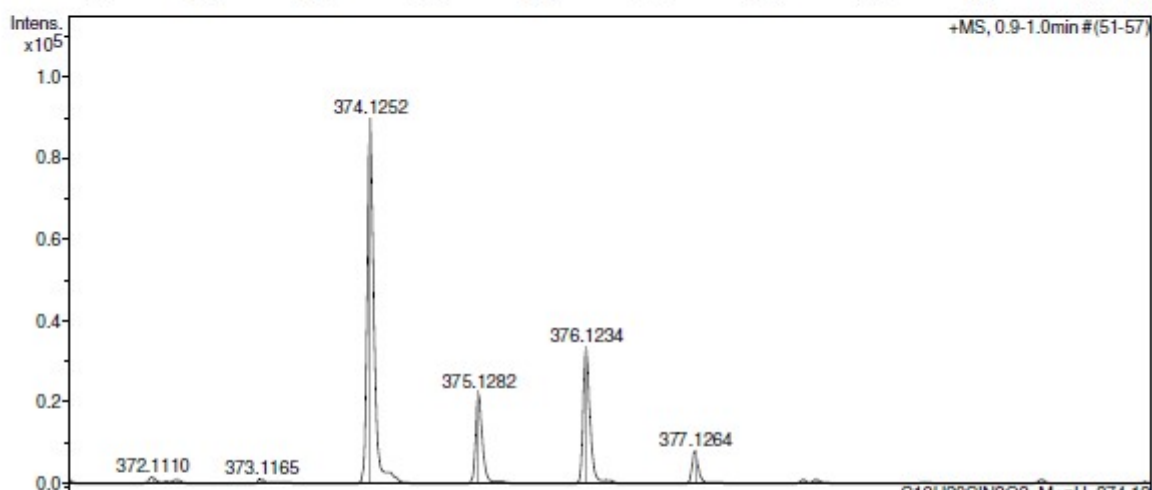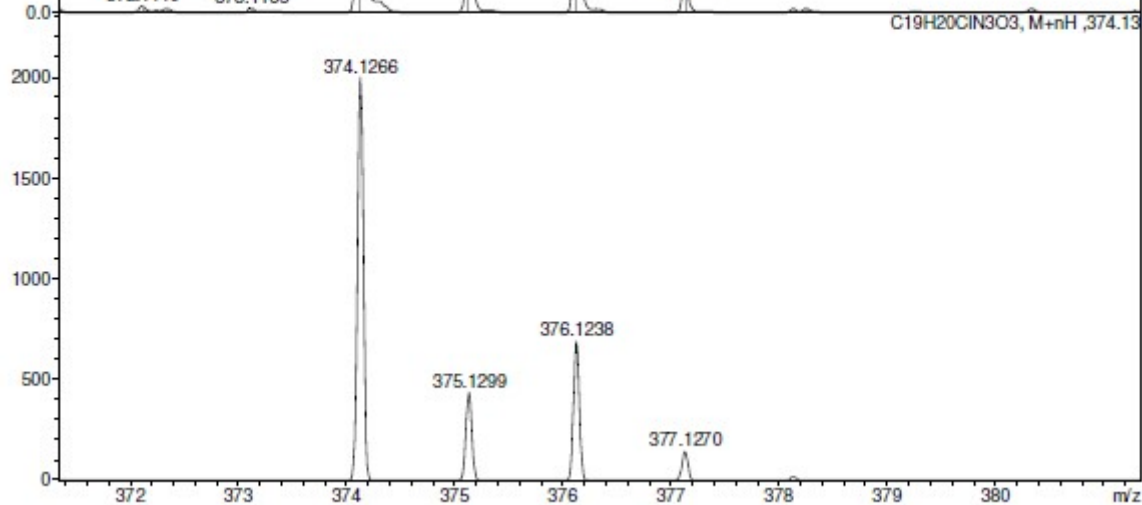

# HRMS for compound 7q

## Acquisition Parameter

|             |            |                      |          |                  |           |
|-------------|------------|----------------------|----------|------------------|-----------|
| Source Type | ESI        | Ion Polarity         | Positive | Set Nebulizer    | 0.4 Bar   |
| Focus       | Not active |                      |          | Set Dry Heater   | 180 °C    |
| Scan Begin  | 50 m/z     | Set Capillary        | 4500 V   | Set Dry Gas      | 4.0 l/min |
| Scan End    | 2500 m/z   | Set End Plate Offset | -500 V   | Set Divert Valve | Waste     |

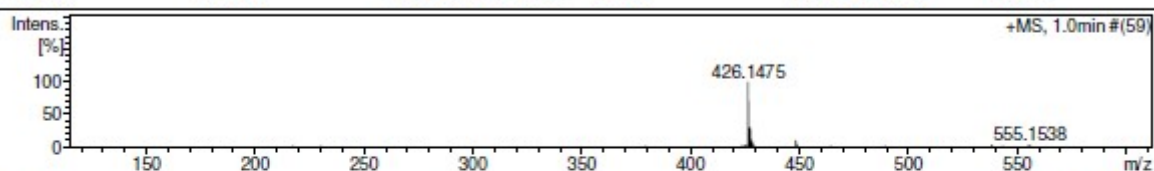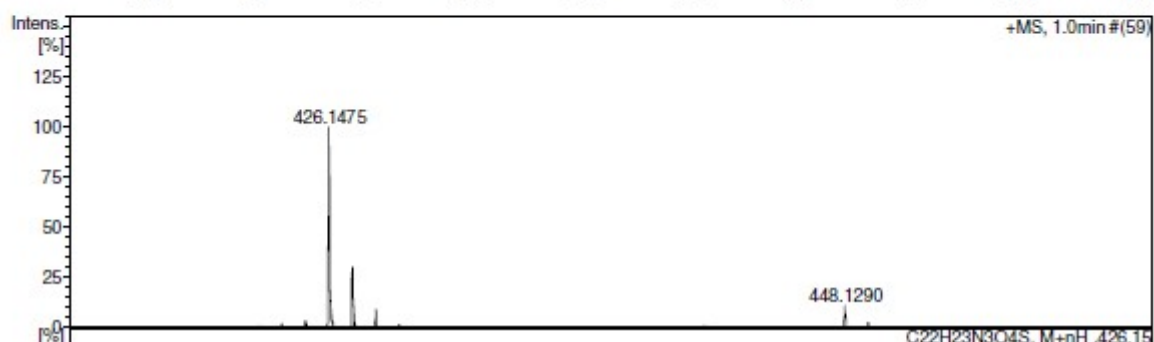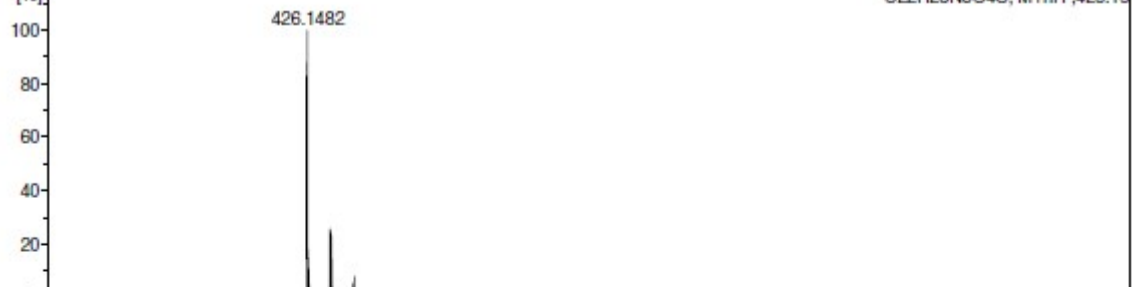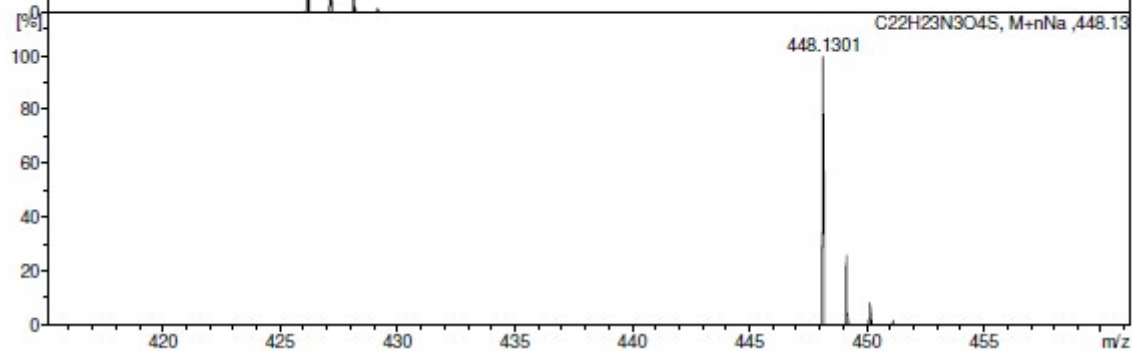

# HRMS for compound 7r

## Acquisition Parameter

|             |            |                      |          |                  |           |
|-------------|------------|----------------------|----------|------------------|-----------|
| Source Type | ESI        | Ion Polarity         | Positive | Set Nebulizer    | 0.4 Bar   |
| Focus       | Not active |                      |          | Set Dry Heater   | 180 °C    |
| Scan Begin  | 50 m/z     | Set Capillary        | 4500 V   | Set Dry Gas      | 4.0 l/min |
| Scan End    | 1600 m/z   | Set End Plate Offset | -500 V   | Set Divert Valve | Waste     |

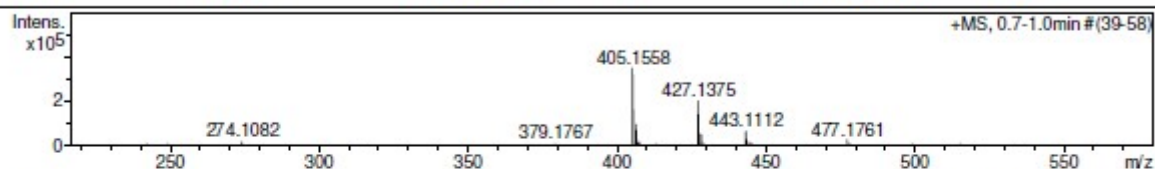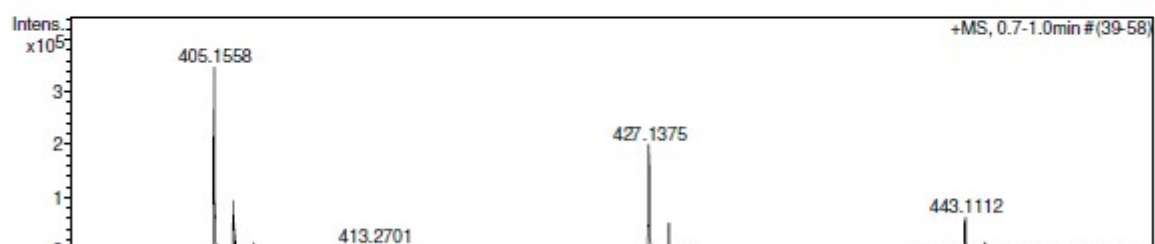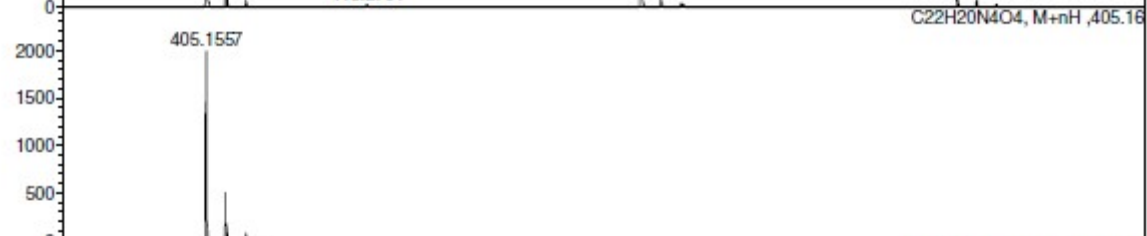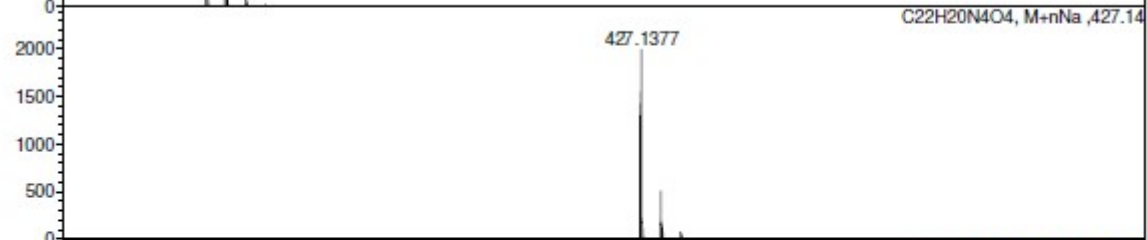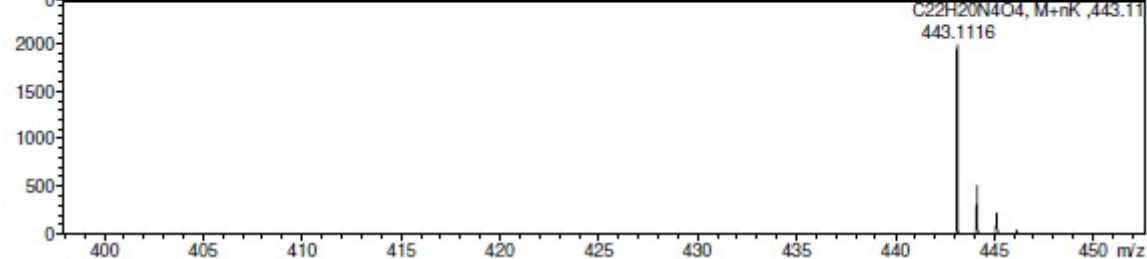

# HRMS for compound 9a

## Acquisition Parameter

|             |            |                      |          |                  |           |
|-------------|------------|----------------------|----------|------------------|-----------|
| Source Type | ESI        | Ion Polarity         | Positive | Set Nebulizer    | 0.4 Bar   |
| Focus       | Not active |                      |          | Set Dry Heater   | 180 °C    |
| Scan Begin  | 50 m/z     | Set Capillary        | 4500 V   | Set Dry Gas      | 4.0 l/min |
| Scan End    | 2500 m/z   | Set End Plate Offset | -500 V   | Set Divert Valve | Waste     |

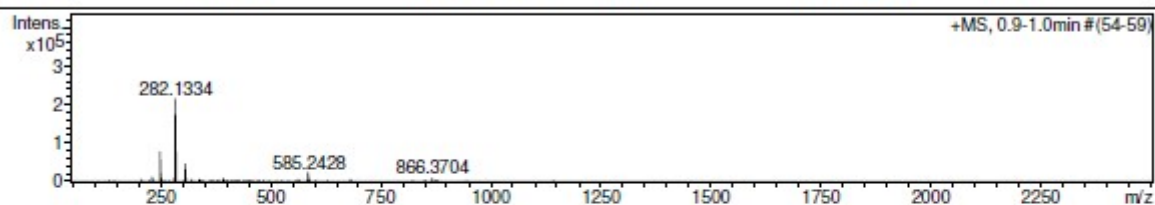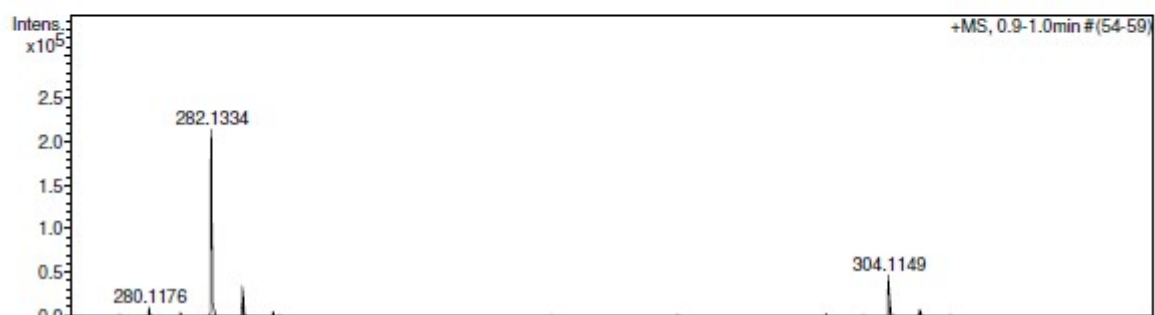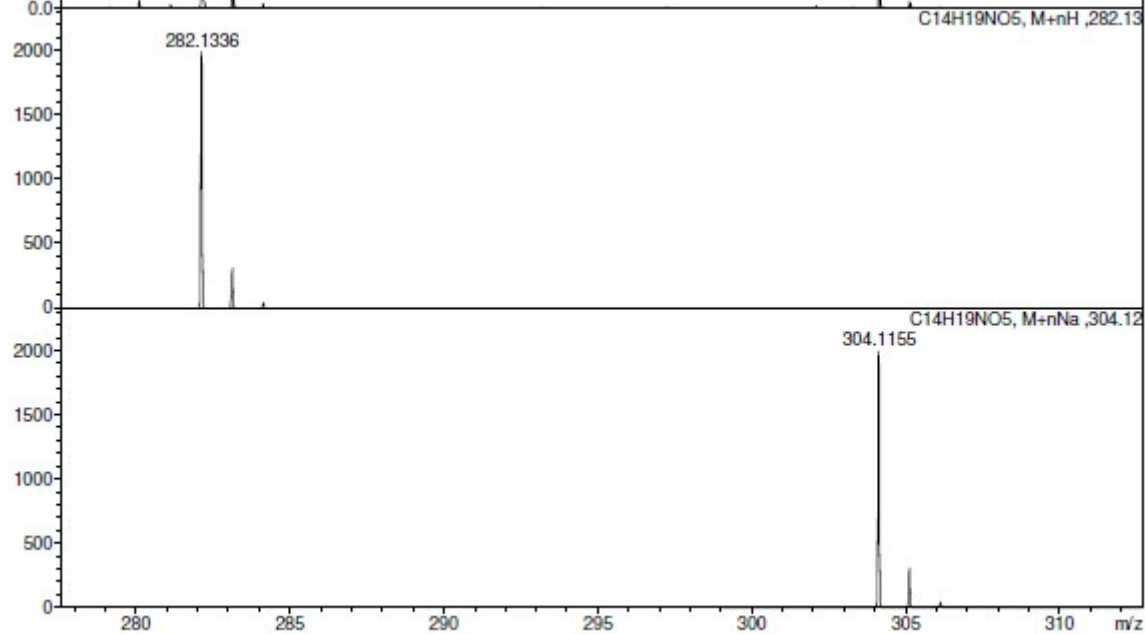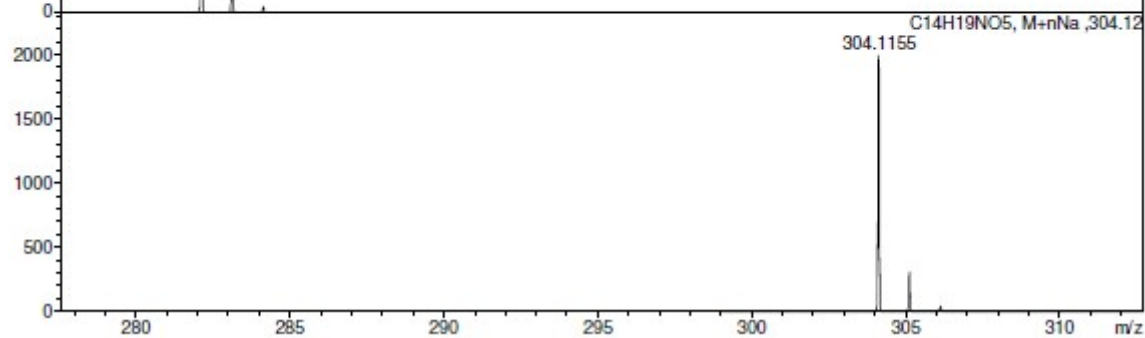

# HRMS for compound 9b

## Acquisition Parameter

|             |            |                      |          |                  |           |
|-------------|------------|----------------------|----------|------------------|-----------|
| Source Type | ESI        | Ion Polarity         | Positive | Set Nebulizer    | 0.4 Bar   |
| Focus       | Not active |                      |          | Set Dry Heater   | 180 °C    |
| Scan Begin  | 50 m/z     | Set Capillary        | 4500 V   | Set Dry Gas      | 4.0 l/min |
| Scan End    | 3000 m/z   | Set End Plate Offset | -500 V   | Set Divert Valve | Waste     |

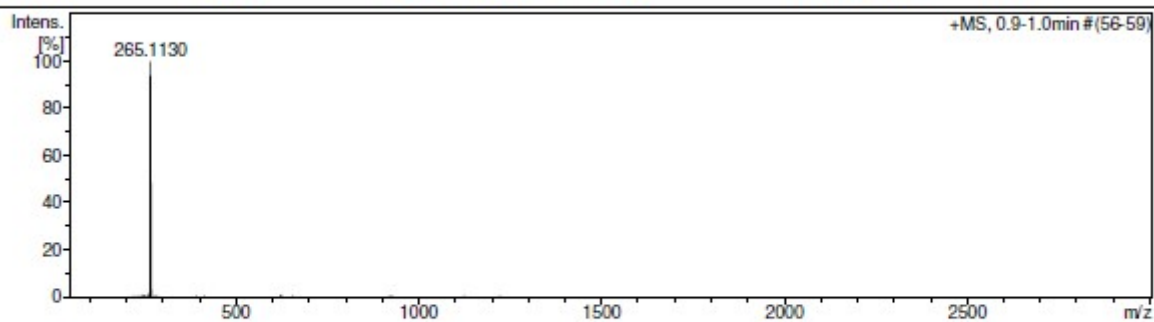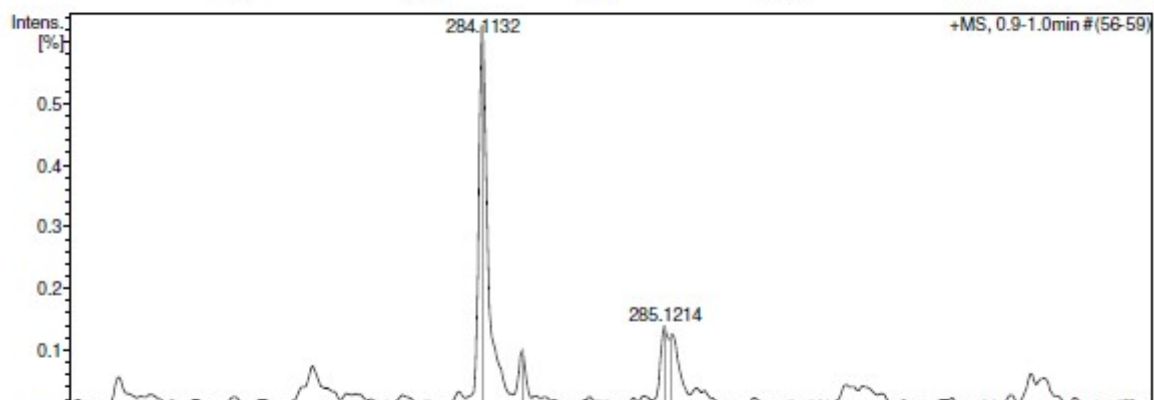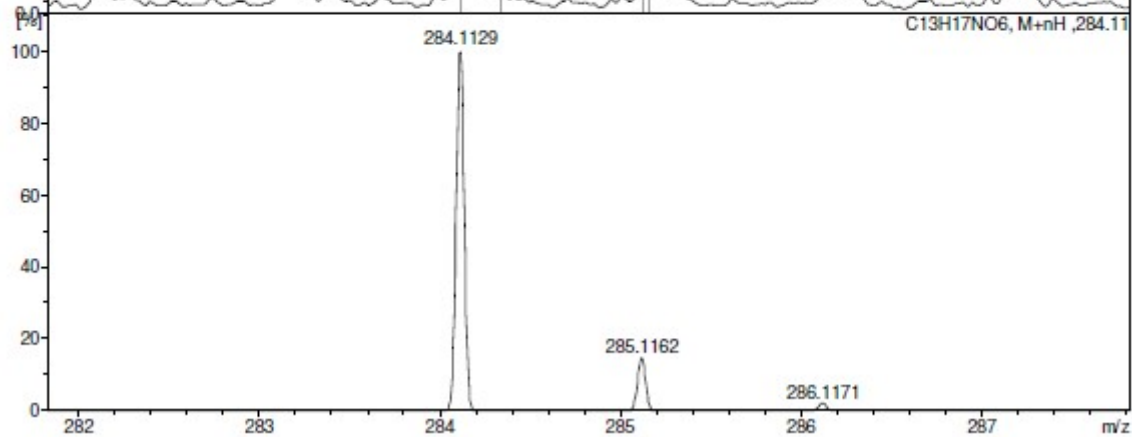

# HRMS for compound 9c

## Acquisition Parameter

|             |            |                      |          |                  |           |
|-------------|------------|----------------------|----------|------------------|-----------|
| Source Type | ESI        | Ion Polarity         | Positive | Set Nebulizer    | 0.4 Bar   |
| Focus       | Not active |                      |          | Set Dry Heater   | 180 °C    |
| Scan Begin  | 50 m/z     | Set Capillary        | 4500 V   | Set Dry Gas      | 4.0 l/min |
| Scan End    | 1500 m/z   | Set End Plate Offset | -500 V   | Set Divert Valve | Source    |

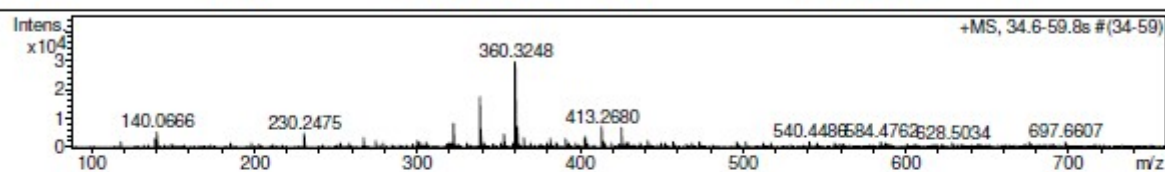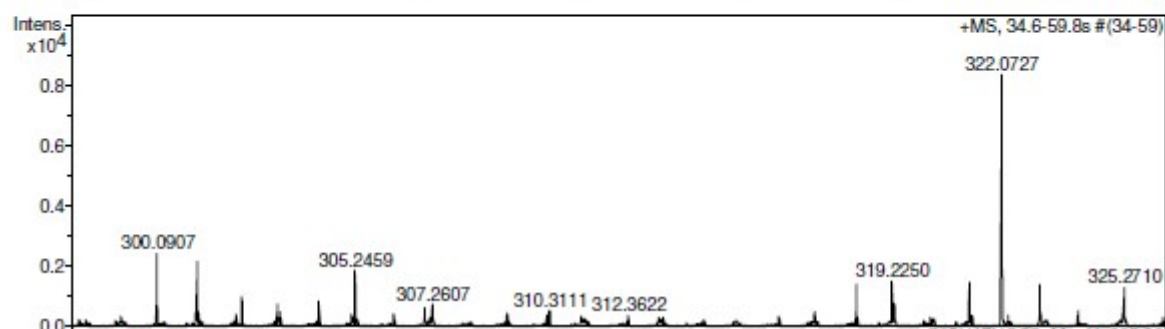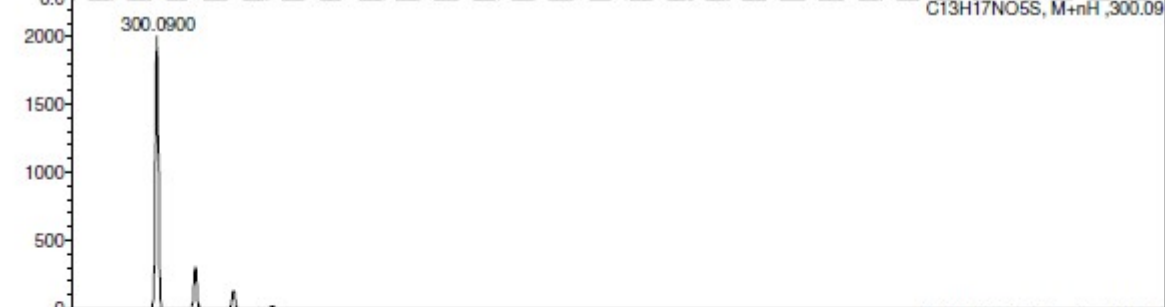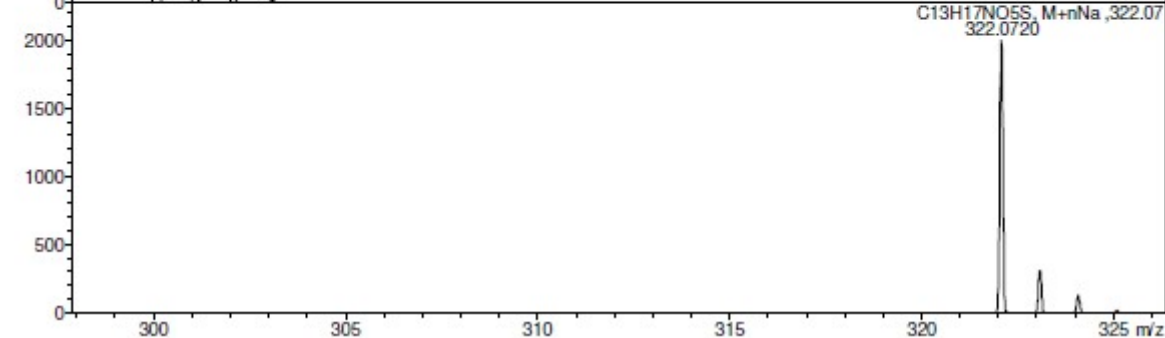

HRMS for compound **8a**

**Acquisition Parameter**

|             |            |                      |          |                  |           |
|-------------|------------|----------------------|----------|------------------|-----------|
| Source Type | ESI        | Ion Polarity         | Positive | Set Nebulizer    | 0.4 Bar   |
| Focus       | Not active |                      |          | Set Dry Heater   | 180 °C    |
| Scan Begin  | 50 m/z     | Set Capillary        | 4500 V   | Set Dry Gas      | 4.0 l/min |
| Scan End    | 1600 m/z   | Set End Plate Offset | -500 V   | Set Divert Valve | Waste     |

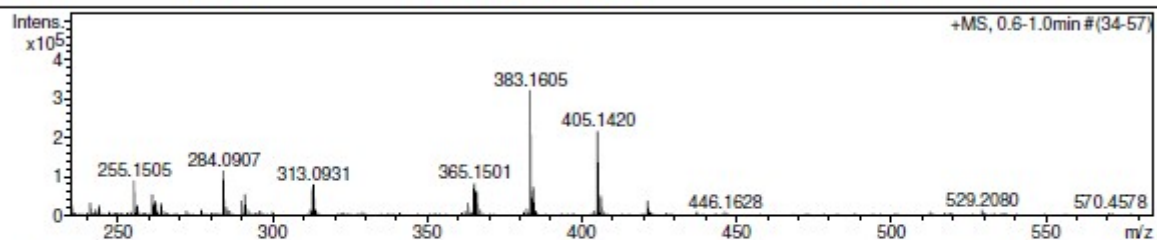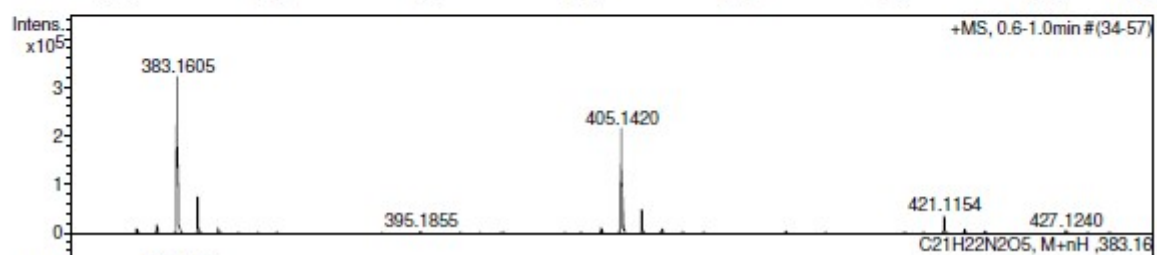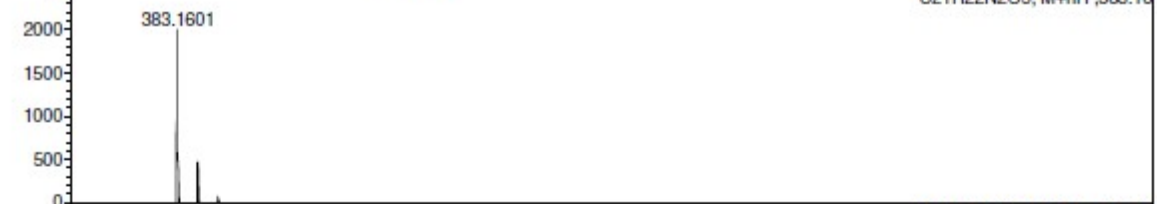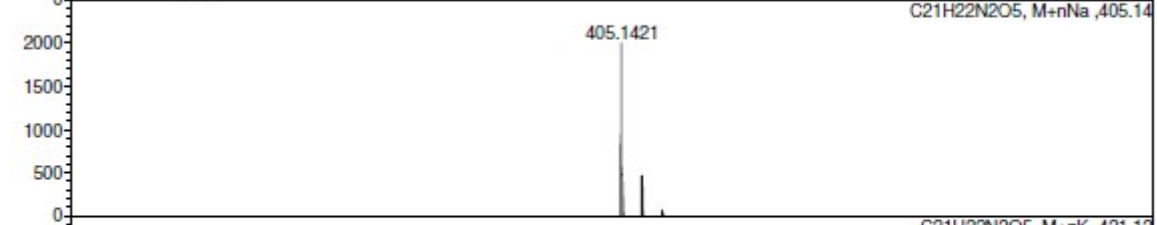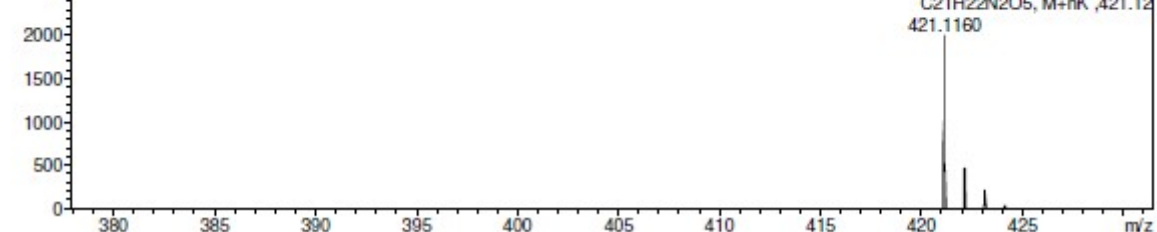



HRMS for compound **8b**

**Acquisition Parameter**

|             |            |                      |          |                  |           |
|-------------|------------|----------------------|----------|------------------|-----------|
| Source Type | ESI        | Ion Polarity         | Positive | Set Nebulizer    | 0.4 Bar   |
| Focus       | Not active |                      |          | Set Dry Heater   | 180 °C    |
| Scan Begin  | 50 m/z     | Set Capillary        | 4500 V   | Set Dry Gas      | 4.0 l/min |
| Scan End    | 3000 m/z   | Set End Plate Offset | -500 V   | Set Divert Valve | Waste     |

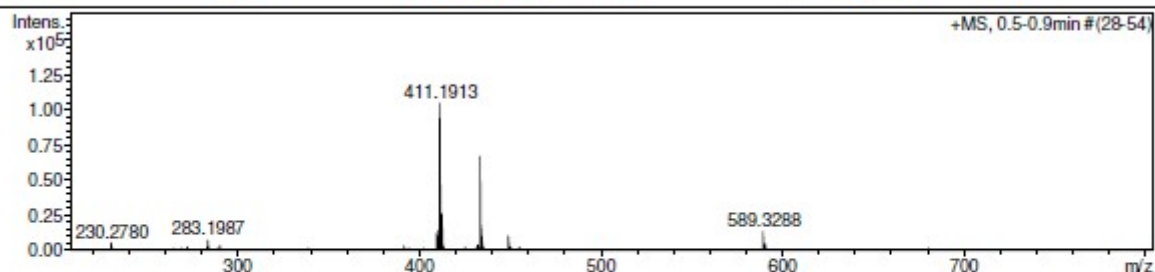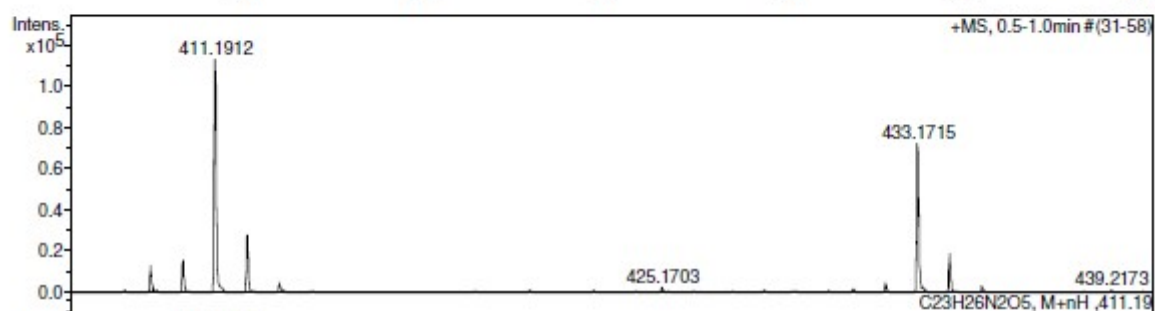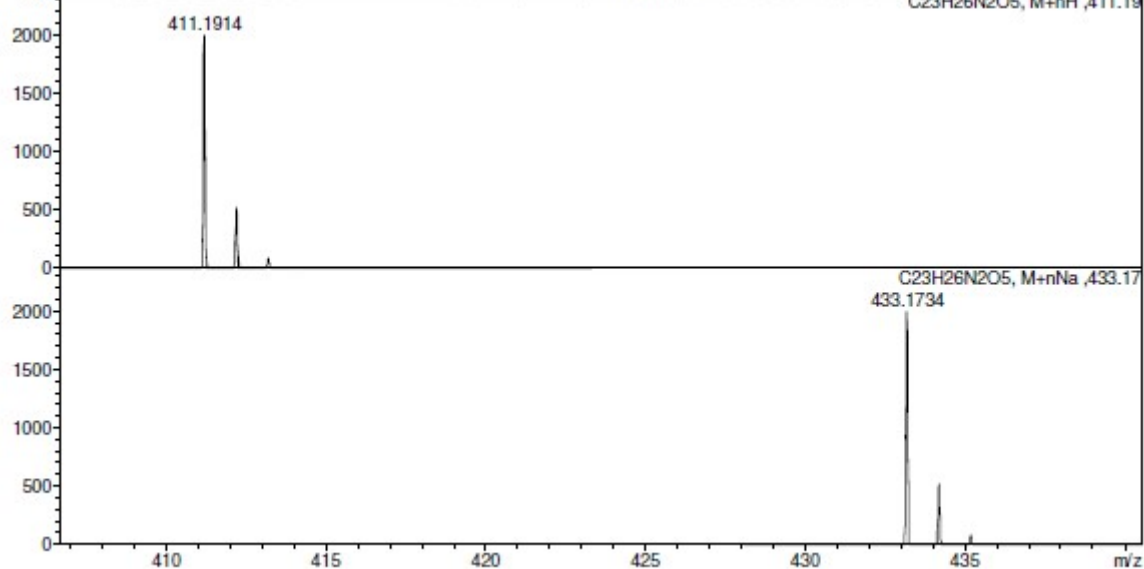

HRMS for compound **8c**

**Acquisition Parameter**

|             |            |                      |          |                  |           |
|-------------|------------|----------------------|----------|------------------|-----------|
| Source Type | ESI        | Ion Polarity         | Positive | Set Nebulizer    | 0.4 Bar   |
| Focus       | Not active |                      |          | Set Dry Heater   | 180 °C    |
| Scan Begin  | 50 m/z     | Set Capillary        | 4500 V   | Set Dry Gas      | 4.0 l/min |
| Scan End    | 3000 m/z   | Set End Plate Offset | -500 V   | Set Divert Valve | Waste     |

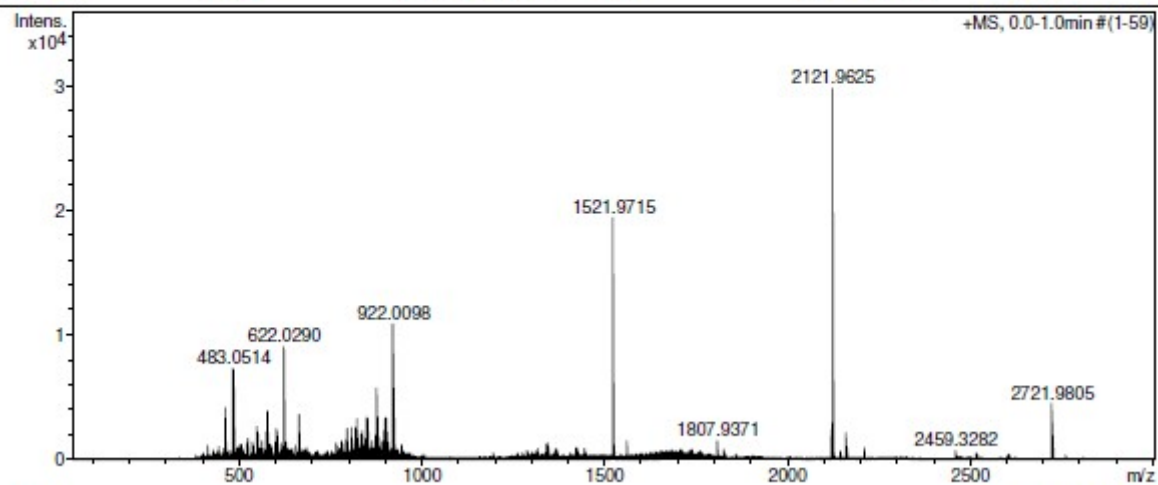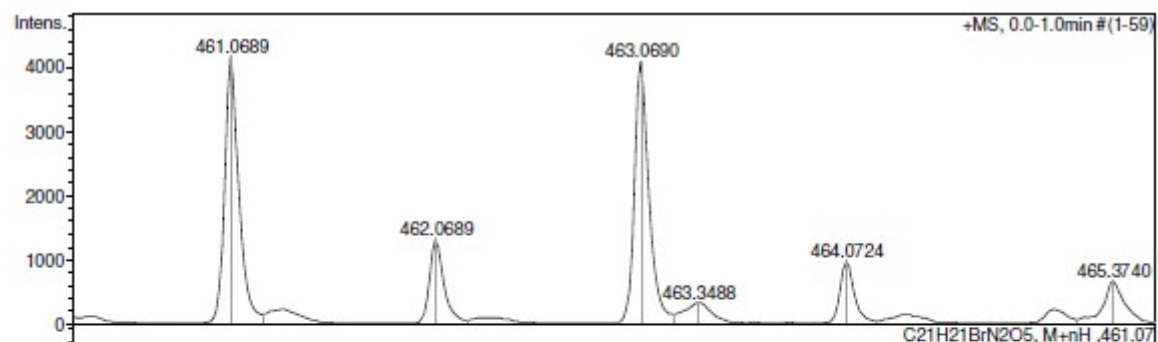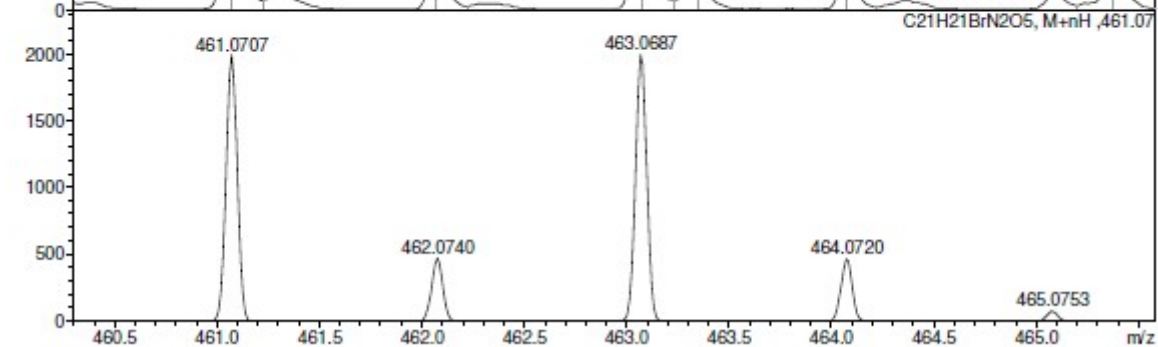

# HRMS for compound **8d**

## Acquisition Parameter

|             |            |                      |          |                  |           |
|-------------|------------|----------------------|----------|------------------|-----------|
| Source Type | ESI        | Ion Polarity         | Positive | Set Nebulizer    | 0.4 Bar   |
| Focus       | Not active |                      |          | Set Dry Heater   | 180 °C    |
| Scan Begin  | 50 m/z     | Set Capillary        | 4500 V   | Set Dry Gas      | 4.0 l/min |
| Scan End    | 3000 m/z   | Set End Plate Offset | -500 V   | Set Divert Valve | Waste     |

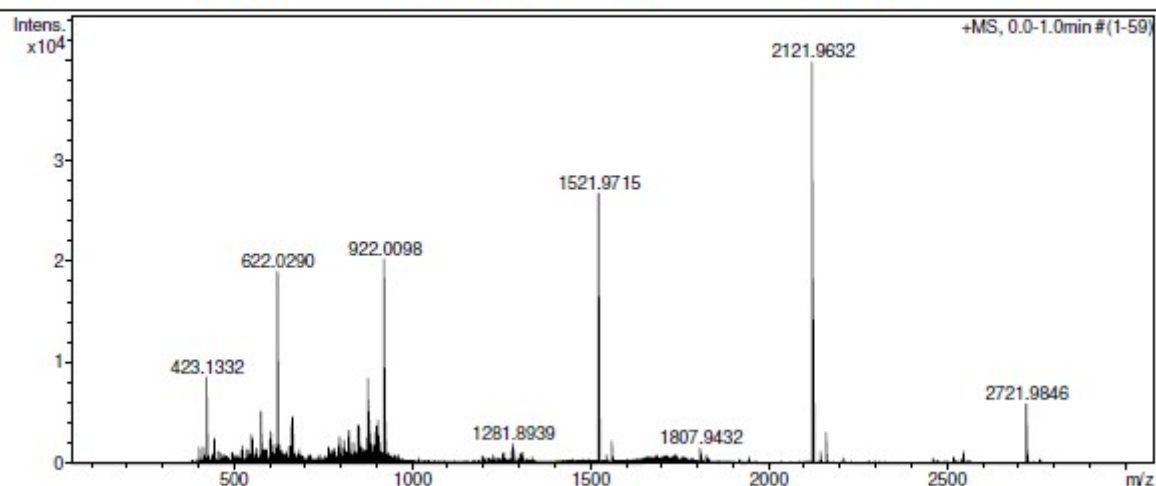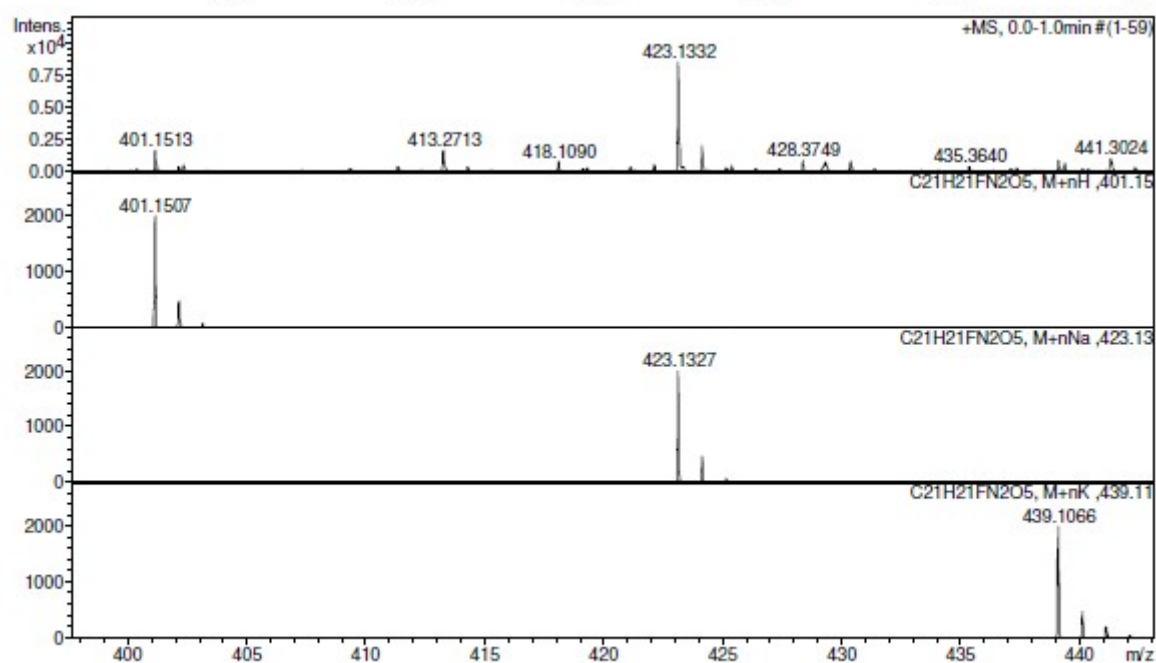

HRMS for compound **8e**

**Acquisition Parameter**

|             |            |                      |          |                  |           |
|-------------|------------|----------------------|----------|------------------|-----------|
| Source Type | ESI        | Ion Polarity         | Positive | Set Nebulizer    | 0.4 Bar   |
| Focus       | Not active |                      |          | Set Dry Heater   | 180 °C    |
| Scan Begin  | 50 m/z     | Set Capillary        | 4500 V   | Set Dry Gas      | 4.0 l/min |
| Scan End    | 3000 m/z   | Set End Plate Offset | -500 V   | Set Divert Valve | Waste     |

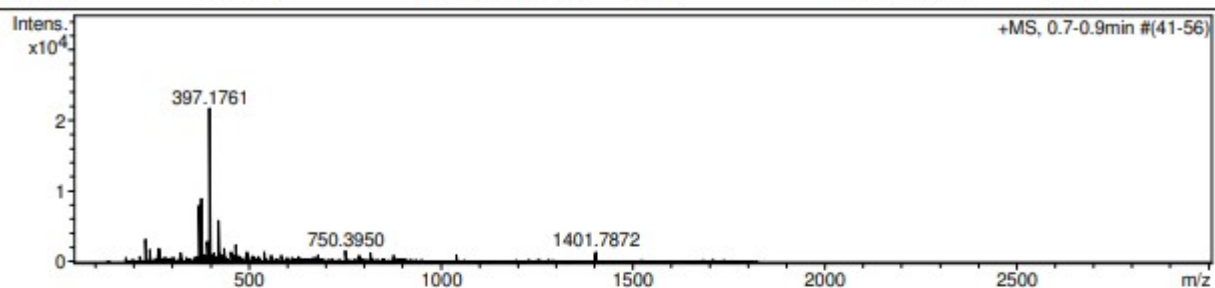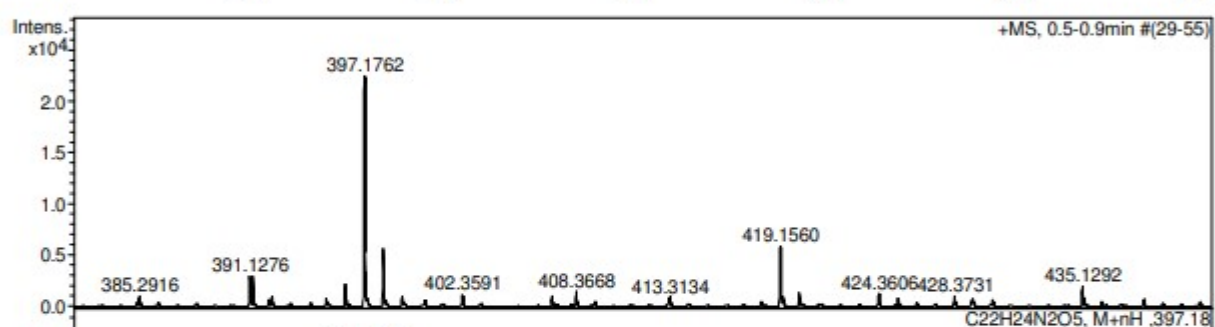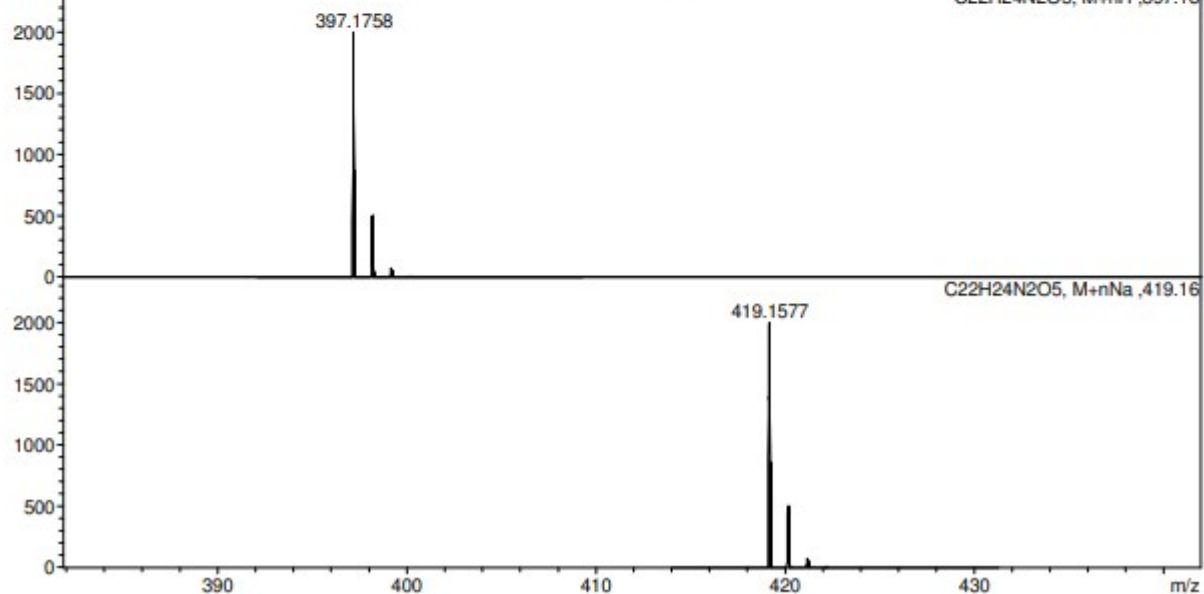

HRMS for compound **8f**

**Acquisition Parameter**

|             |            |                      |          |                  |           |
|-------------|------------|----------------------|----------|------------------|-----------|
| Source Type | ESI        | Ion Polarity         | Positive | Set Nebulizer    | 0.4 Bar   |
| Focus       | Not active |                      |          | Set Dry Heater   | 180 °C    |
| Scan Begin  | 50 m/z     | Set Capillary        | 4500 V   | Set Dry Gas      | 4.0 l/min |
| Scan End    | 3000 m/z   | Set End Plate Offset | -500 V   | Set Divert Valve | Waste     |

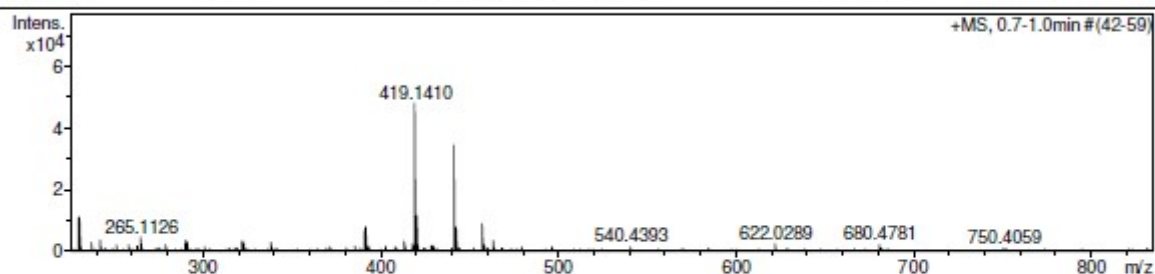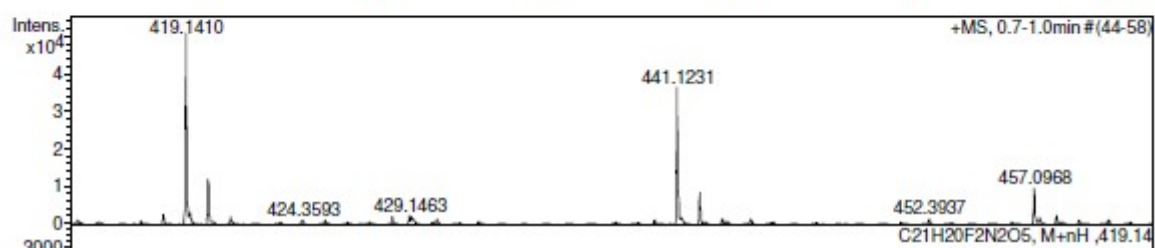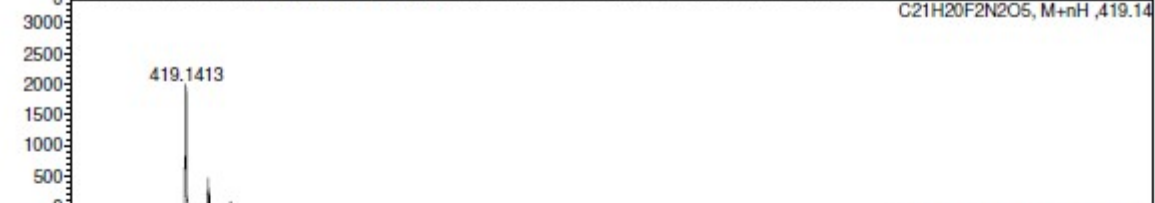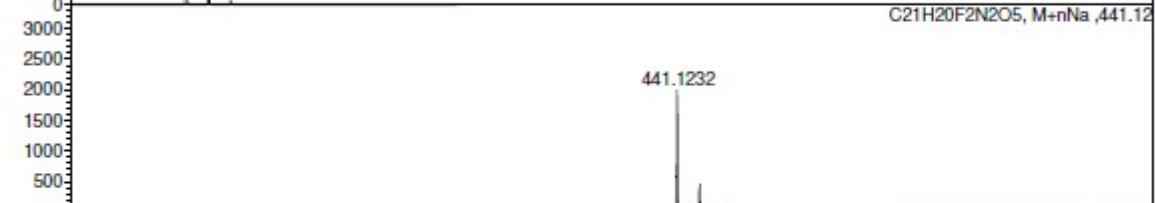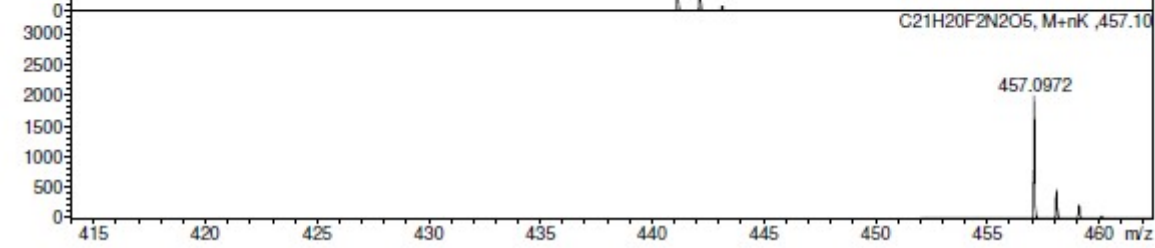

HRMS for compound **8g**

**Acquisition Parameter**

|             |            |                      |          |                  |           |
|-------------|------------|----------------------|----------|------------------|-----------|
| Source Type | ESI        | Ion Polarity         | Positive | Set Nebulizer    | 0.4 Bar   |
| Focus       | Not active |                      |          | Set Dry Heater   | 180 °C    |
| Scan Begin  | 50 m/z     | Set Capillary        | 4500 V   | Set Dry Gas      | 4.0 l/min |
| Scan End    | 3000 m/z   | Set End Plate Offset | -500 V   | Set Divert Valve | Waste     |

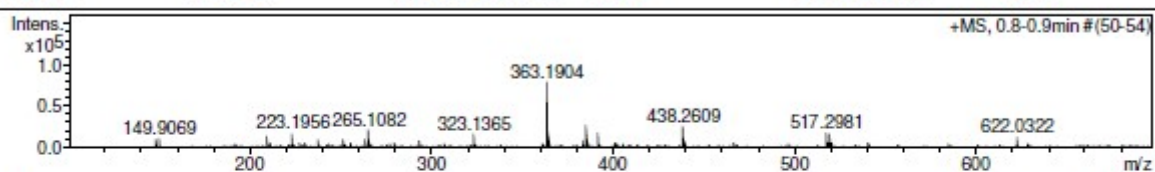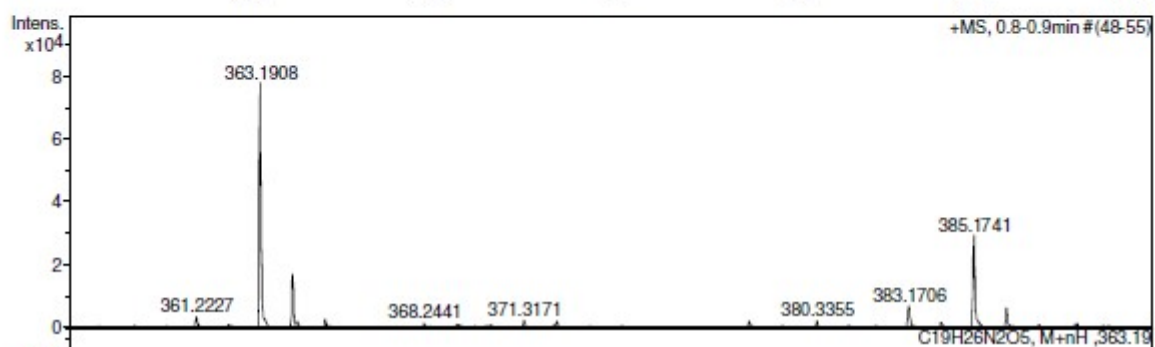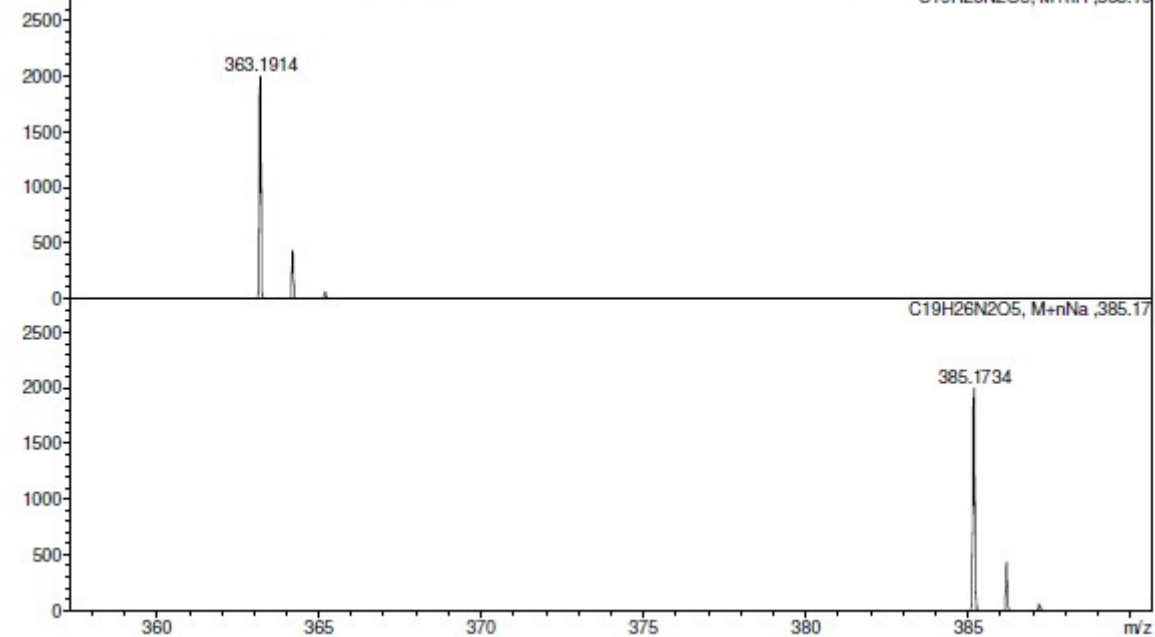

## HRMS for compound 8h

### Acquisition Parameter

|             |            |                      |          |                  |           |
|-------------|------------|----------------------|----------|------------------|-----------|
| Source Type | ESI        | Ion Polarity         | Positive | Set Nebulizer    | 0.4 Bar   |
| Focus       | Not active |                      |          | Set Dry Heater   | 180 °C    |
| Scan Begin  | 50 m/z     | Set Capillary        | 4500 V   | Set Dry Gas      | 4.0 l/min |
| Scan End    | 3000 m/z   | Set End Plate Offset | -500 V   | Set Divert Valve | Waste     |

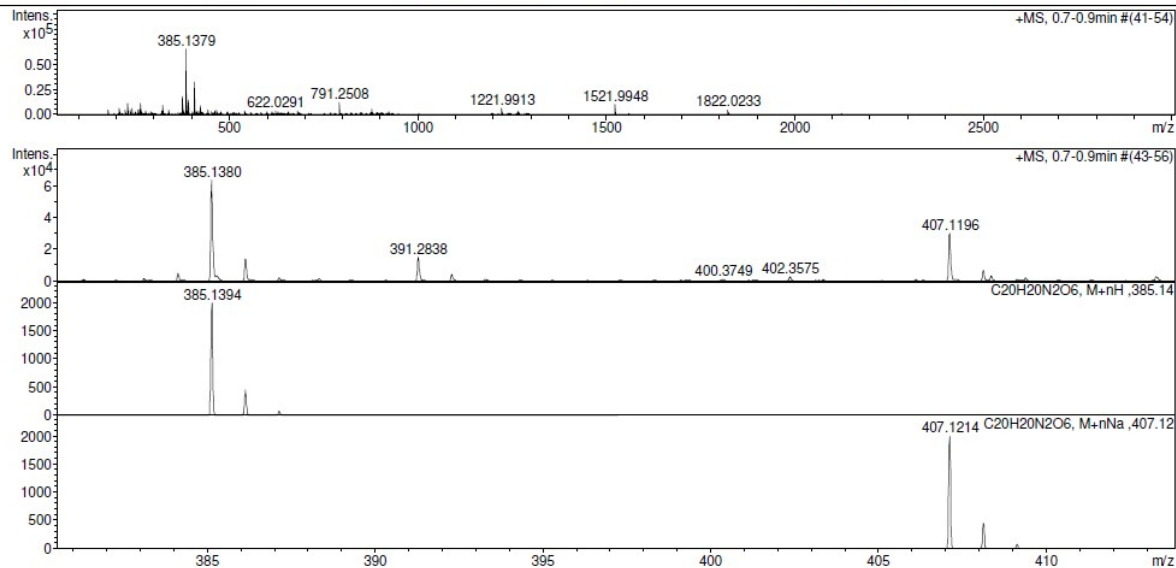

## HRMS for compound 8i

### Acquisition Parameter

|             |            |                      |          |                  |           |
|-------------|------------|----------------------|----------|------------------|-----------|
| Source Type | ESI        | Ion Polarity         | Positive | Set Nebulizer    | 0.4 Bar   |
| Focus       | Not active |                      |          | Set Dry Heater   | 180 °C    |
| Scan Begin  | 50 m/z     | Set Capillary        | 4500 V   | Set Dry Gas      | 4.0 l/min |
| Scan End    | 3000 m/z   | Set End Plate Offset | -500 V   | Set Divert Valve | Waste     |

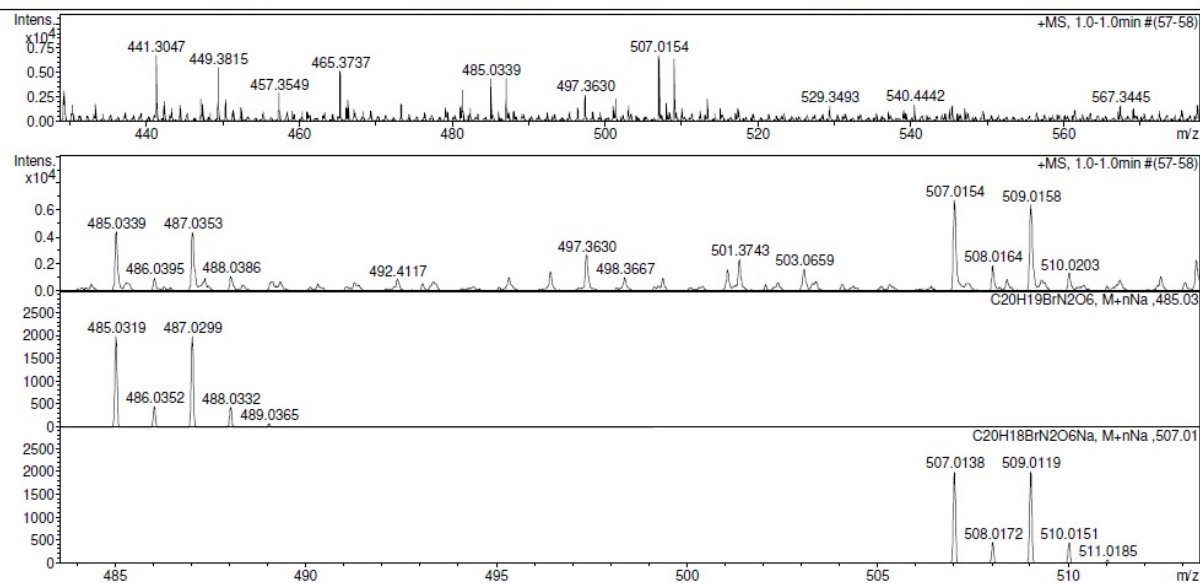

HRMS for compound **8j**

**Acquisition Parameter**

|             |            |                      |          |                  |           |
|-------------|------------|----------------------|----------|------------------|-----------|
| Source Type | ESI        | Ion Polarity         | Positive | Set Nebulizer    | 0.4 Bar   |
| Focus       | Not active |                      |          | Set Dry Heater   | 180 °C    |
| Scan Begin  | 50 m/z     | Set Capillary        | 4500 V   | Set Dry Gas      | 4.0 l/min |
| Scan End    | 3000 m/z   | Set End Plate Offset | -500 V   | Set Divert Valve | Waste     |

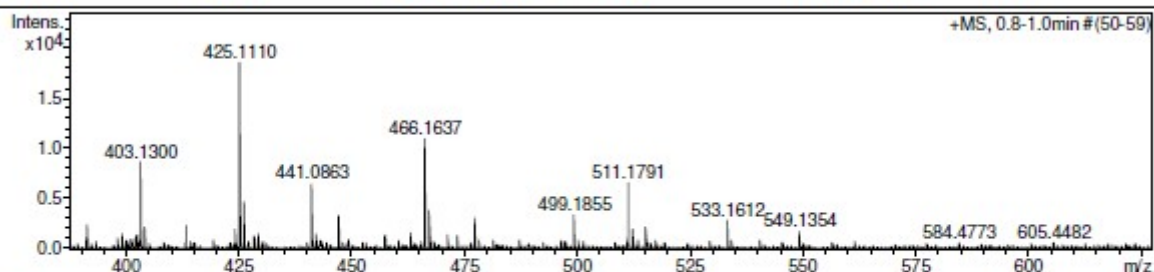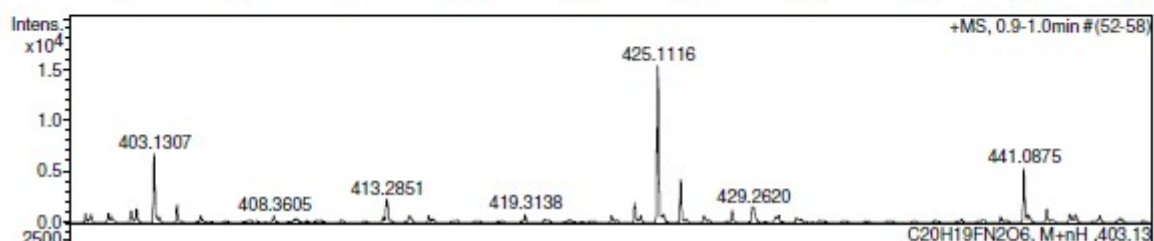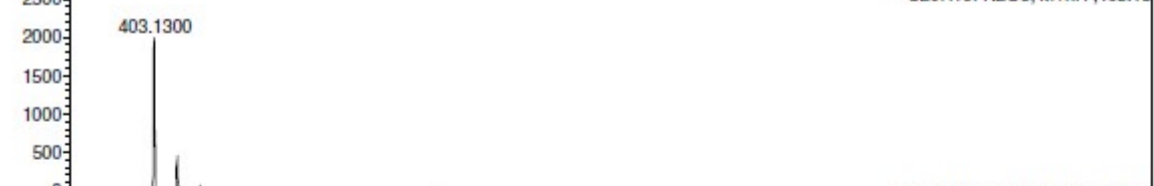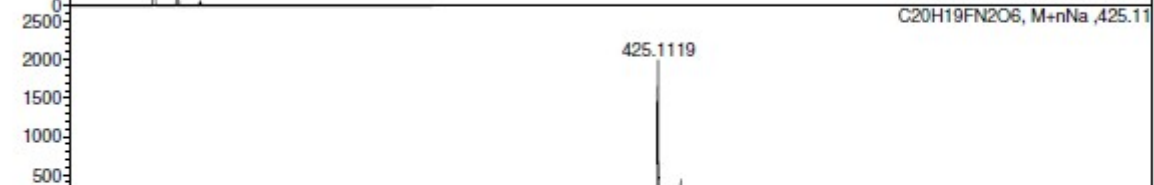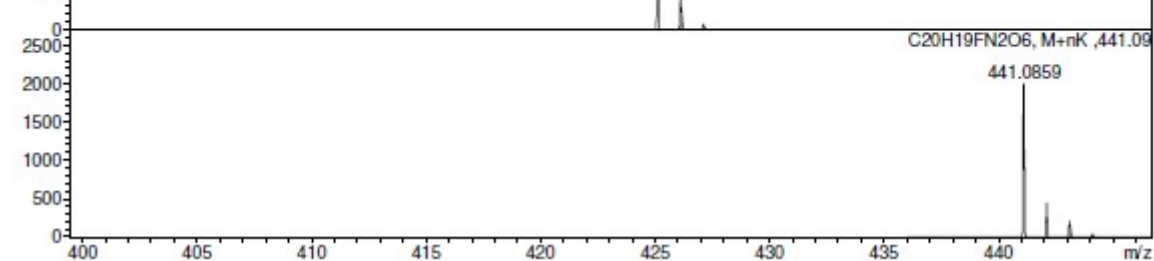



# HRMS for compound 8k

## Acquisition Parameter

|             |            |                      |          |                  |           |
|-------------|------------|----------------------|----------|------------------|-----------|
| Source Type | ESI        | Ion Polarity         | Positive | Set Nebulizer    | 0.4 Bar   |
| Focus       | Not active |                      |          | Set Dry Heater   | 180 °C    |
| Scan Begin  | 50 m/z     | Set Capillary        | 4500 V   | Set Dry Gas      | 4.0 l/min |
| Scan End    | 3000 m/z   | Set End Plate Offset | -500 V   | Set Divert Valve | Waste     |

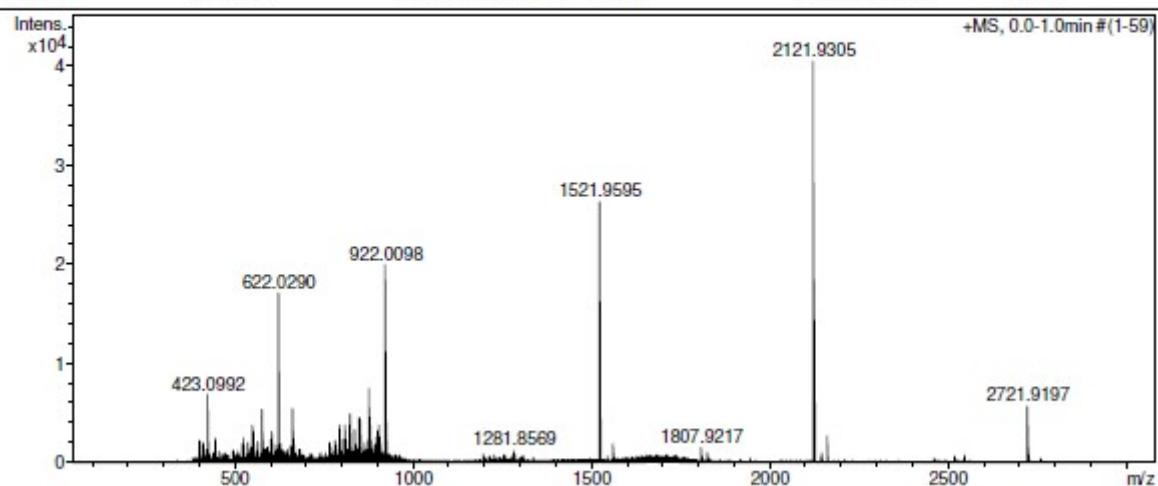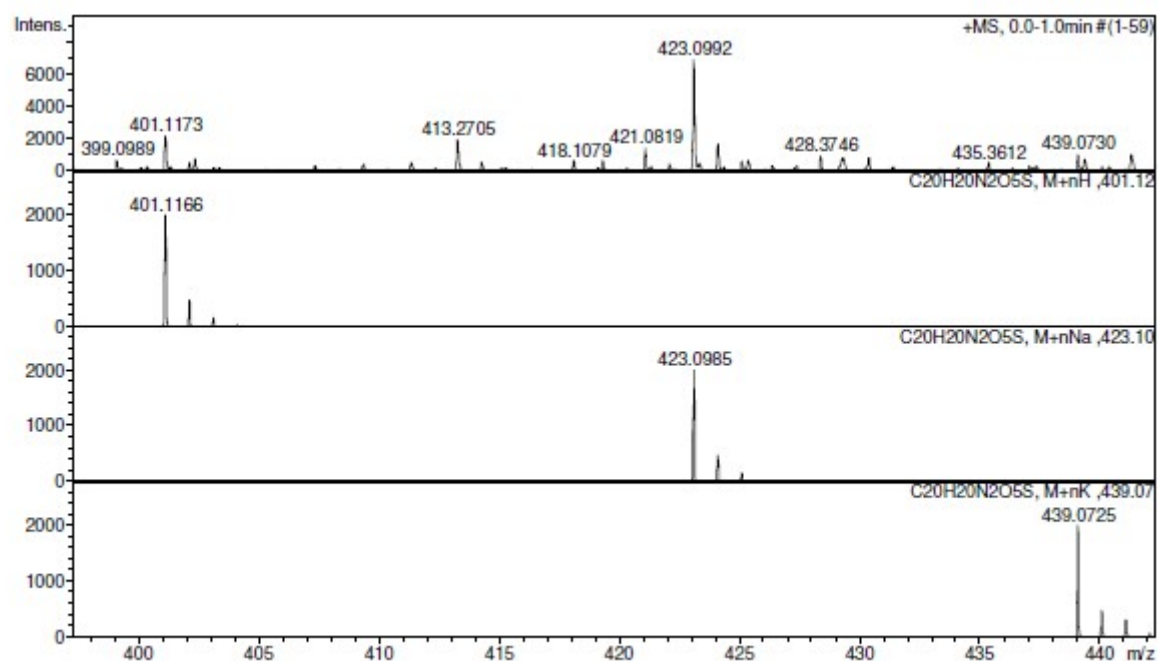

# HRMS for compound 81

## Acquisition Parameter

|             |            |                      |          |                  |           |
|-------------|------------|----------------------|----------|------------------|-----------|
| Source Type | ESI        | Ion Polarity         | Positive | Set Nebulizer    | 0.4 Bar   |
| Focus       | Not active |                      |          | Set Dry Heater   | 180 °C    |
| Scan Begin  | 50 m/z     | Set Capillary        | 4500 V   | Set Dry Gas      | 4.0 l/min |
| Scan End    | 3000 m/z   | Set End Plate Offset | -500 V   | Set Divert Valve | Waste     |

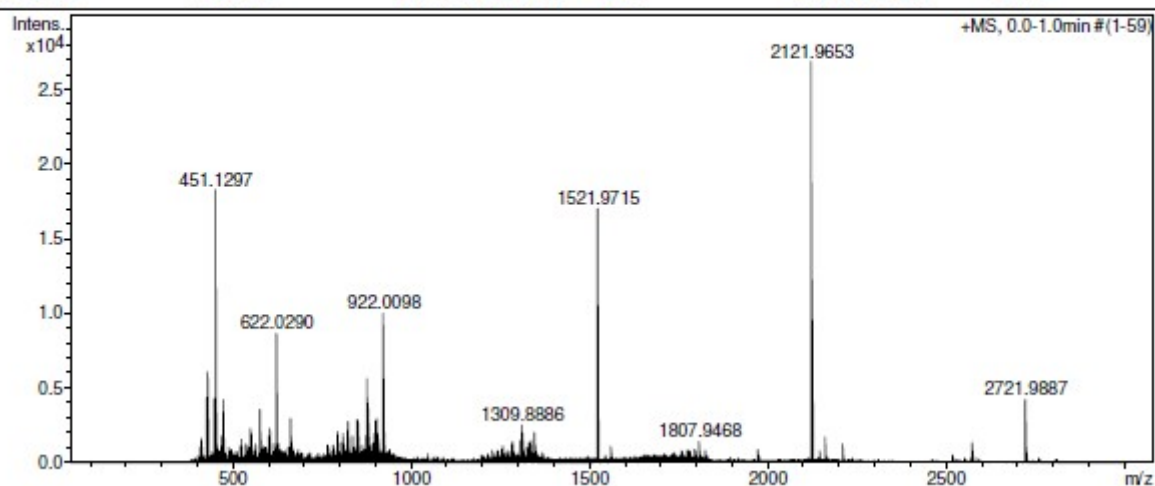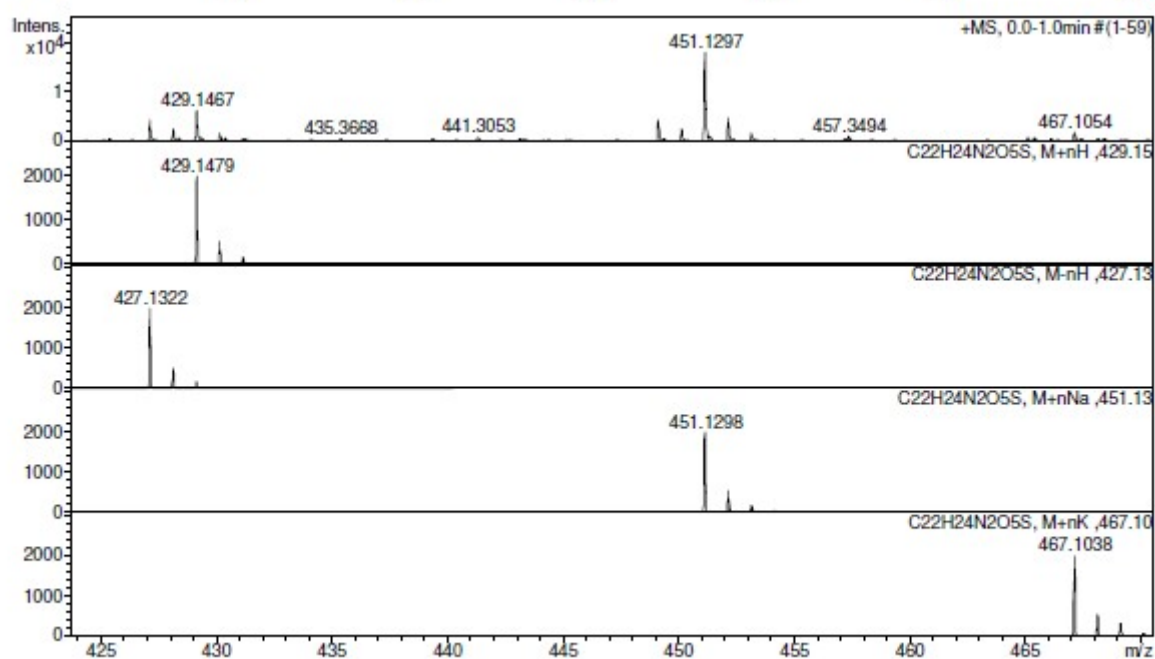

HRMS for compound **8m**

**Acquisition Parameter**

|             |            |                      |          |                  |           |
|-------------|------------|----------------------|----------|------------------|-----------|
| Source Type | ESI        | Ion Polarity         | Positive | Set Nebulizer    | 0.4 Bar   |
| Focus       | Not active |                      |          | Set Dry Heater   | 180 °C    |
| Scan Begin  | 50 m/z     | Set Capillary        | 4500 V   | Set Dry Gas      | 4.0 l/min |
| Scan End    | 3000 m/z   | Set End Plate Offset | -500 V   | Set Divert Valve | Waste     |

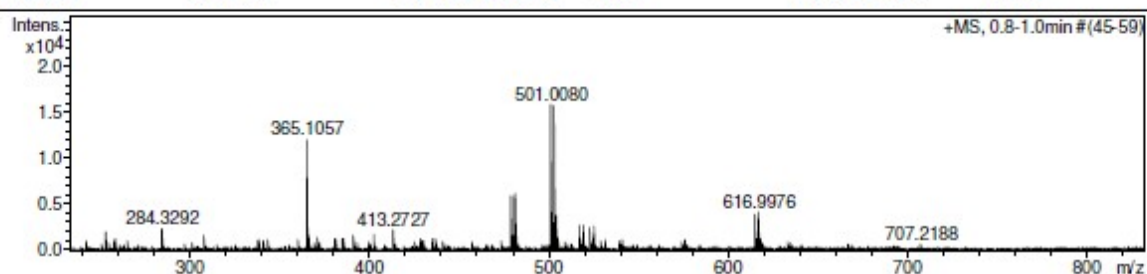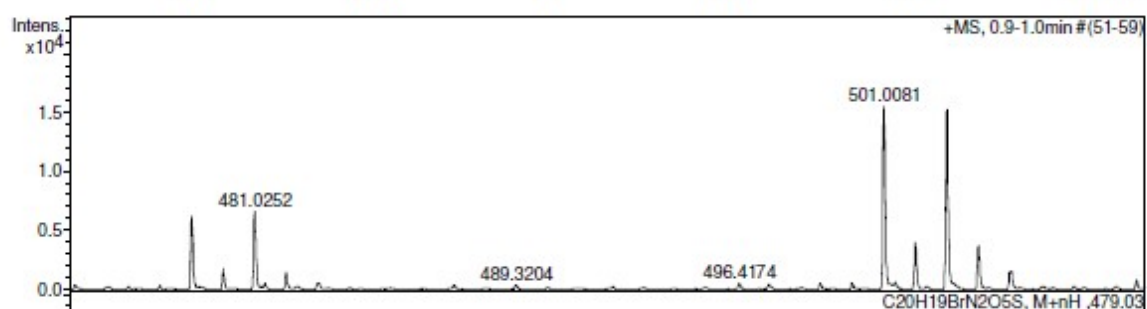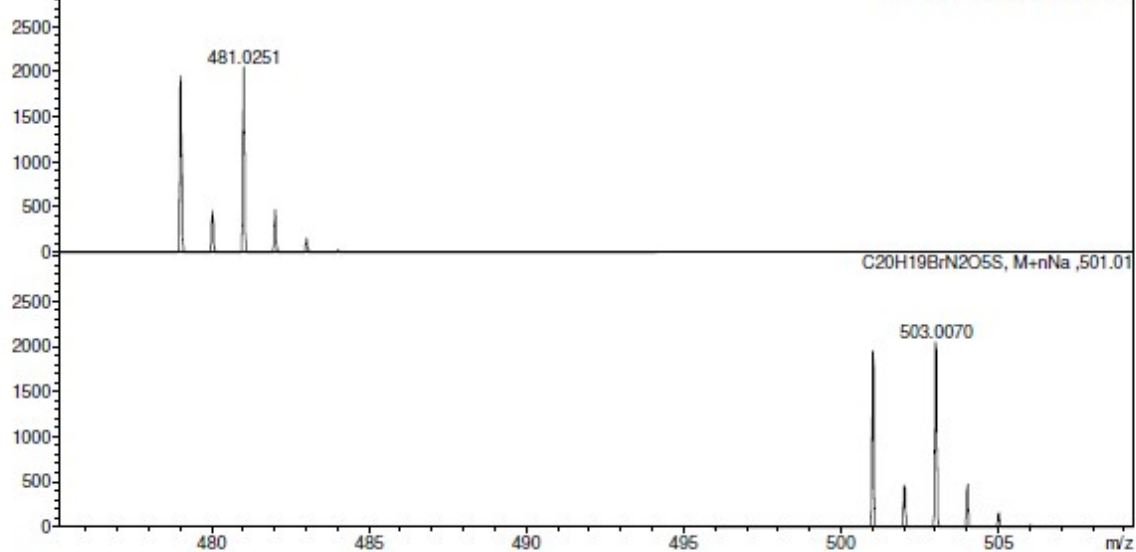

# HRMS for compound **8n**

## Acquisition Parameter

|             |            |                      |          |                  |           |
|-------------|------------|----------------------|----------|------------------|-----------|
| Source Type | ESI        | Ion Polarity         | Positive | Set Nebulizer    | 0.4 Bar   |
| Focus       | Not active | Set Capillary        | 4500 V   | Set Dry Heater   | 180 °C    |
| Scan Begin  | 50 m/z     | Set End Plate Offset | -500 V   | Set Dry Gas      | 4.0 l/min |
| Scan End    | 3000 m/z   |                      |          | Set Divert Valve | Waste     |

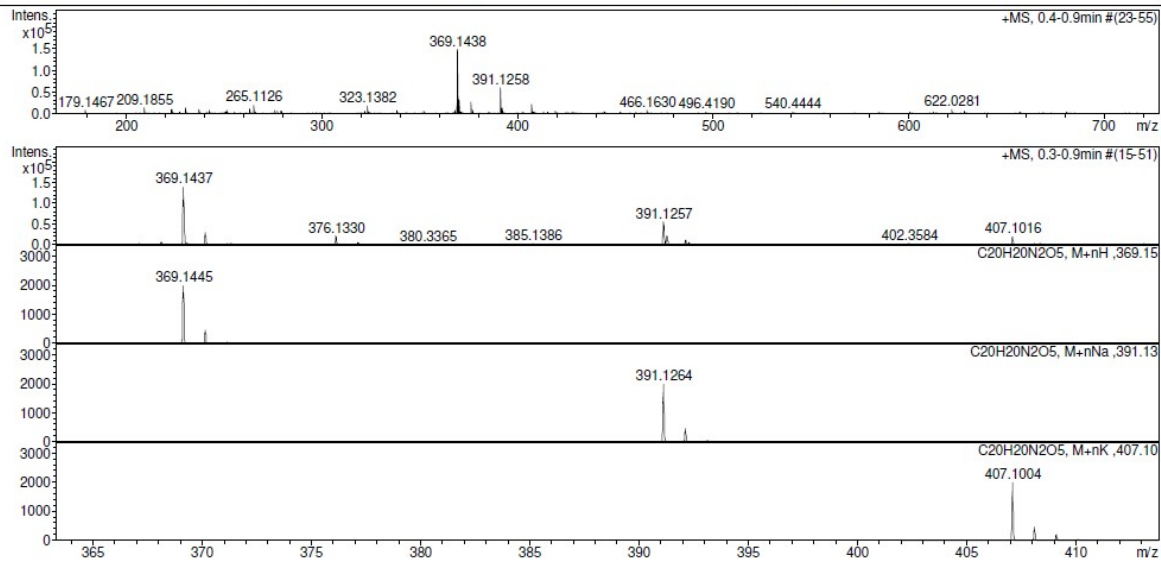

HRMS for compound **8o**

**Acquisition Parameter**

|             |            |                      |          |                  |           |
|-------------|------------|----------------------|----------|------------------|-----------|
| Source Type | ESI        | Ion Polarity         | Positive | Set Nebulizer    | 0.4 Bar   |
| Focus       | Not active |                      |          | Set Dry Heater   | 180 °C    |
| Scan Begin  | 50 m/z     | Set Capillary        | 4500 V   | Set Dry Gas      | 4.0 l/min |
| Scan End    | 3000 m/z   | Set End Plate Offset | -500 V   | Set Divert Valve | Waste     |

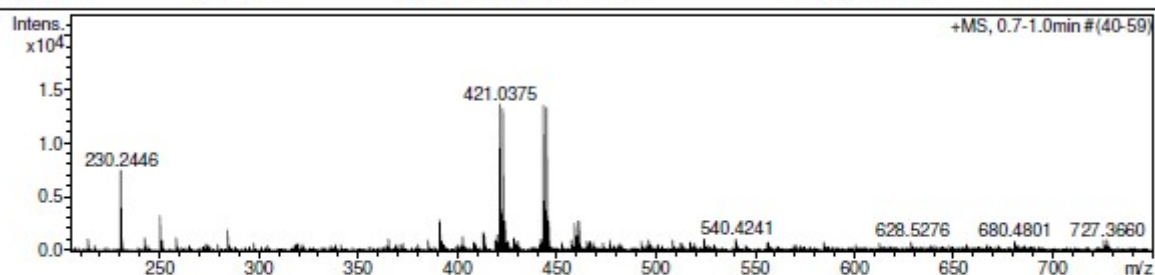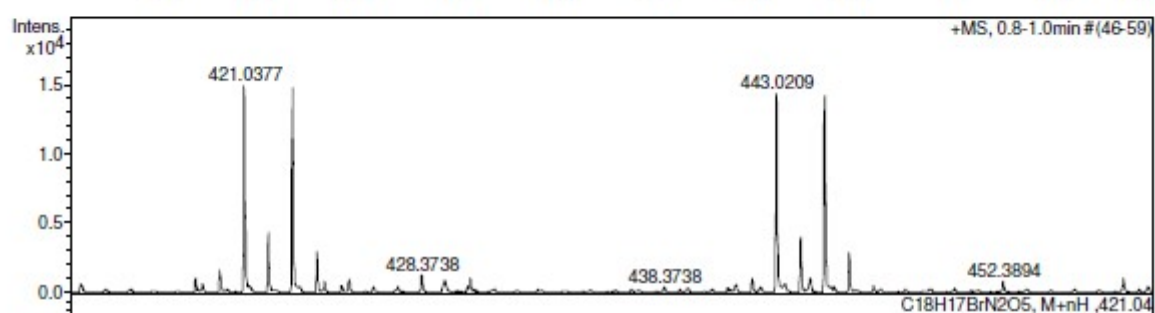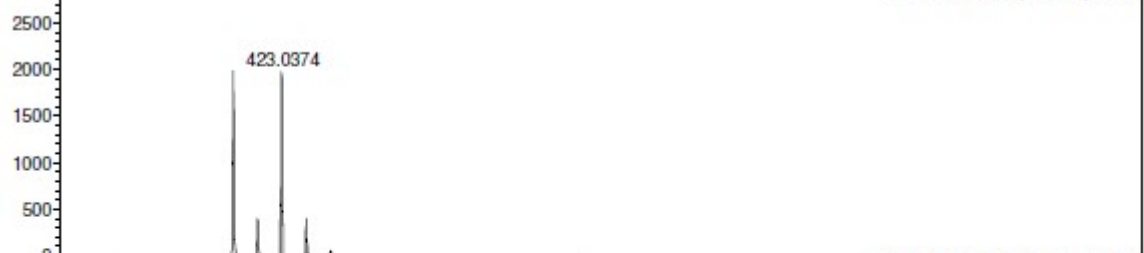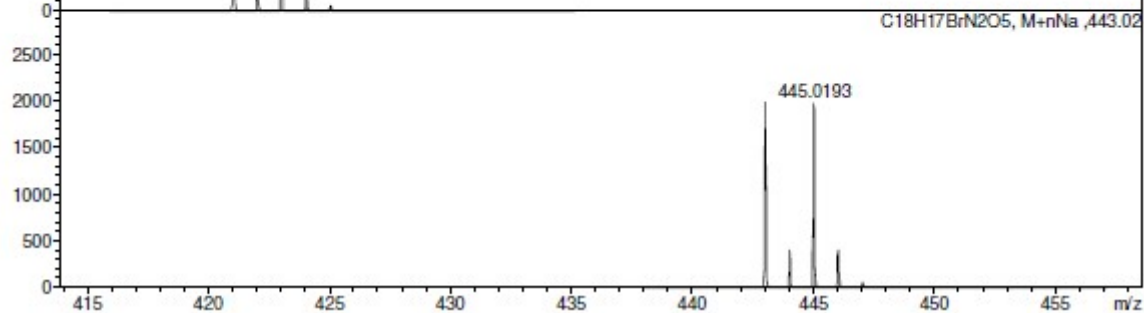

# HRMS for compound 14a

## Acquisition Parameter

|             |            |                      |          |                  |           |
|-------------|------------|----------------------|----------|------------------|-----------|
| Source Type | ESI        | Ion Polarity         | Positive | Set Nebulizer    | 0.4 Bar   |
| Focus       | Not active |                      |          | Set Dry Heater   | 180 °C    |
| Scan Begin  | 50 m/z     | Set Capillary        | 4500 V   | Set Dry Gas      | 4.0 l/min |
| Scan End    | 3000 m/z   | Set End Plate Offset | -500 V   | Set Divert Valve | Waste     |

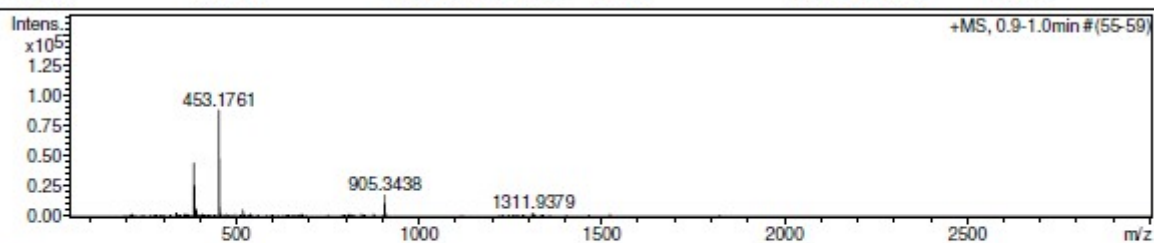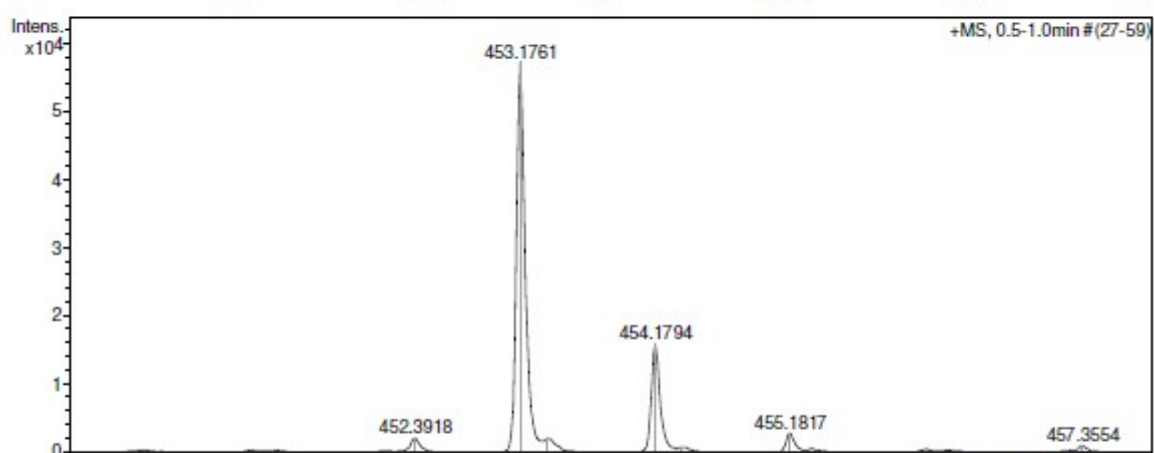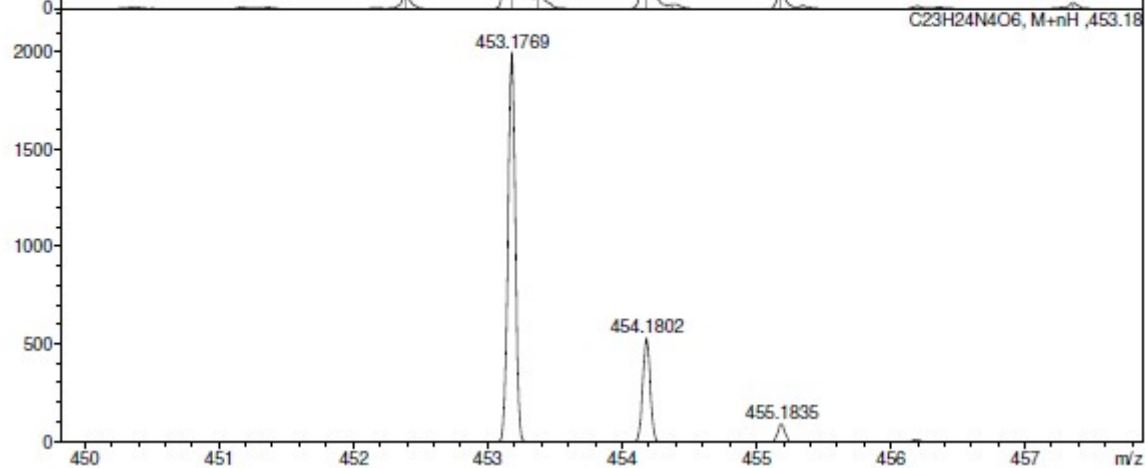

# HRMS for compound 14b

## Acquisition Parameter

|             |          |                      |          |                  |           |
|-------------|----------|----------------------|----------|------------------|-----------|
| Source Type | ESI      | Ion Polarity         | Positive | Set Nebulizer    | 0.5 Bar   |
| Focus       | Active   |                      |          | Set Dry Heater   | 180 °C    |
| Scan Begin  | 50 m/z   | Set Capillary        | 4500 V   | Set Dry Gas      | 4.0 l/min |
| Scan End    | 3000 m/z | Set End Plate Offset | -500 V   | Set Divert Valve | Waste     |

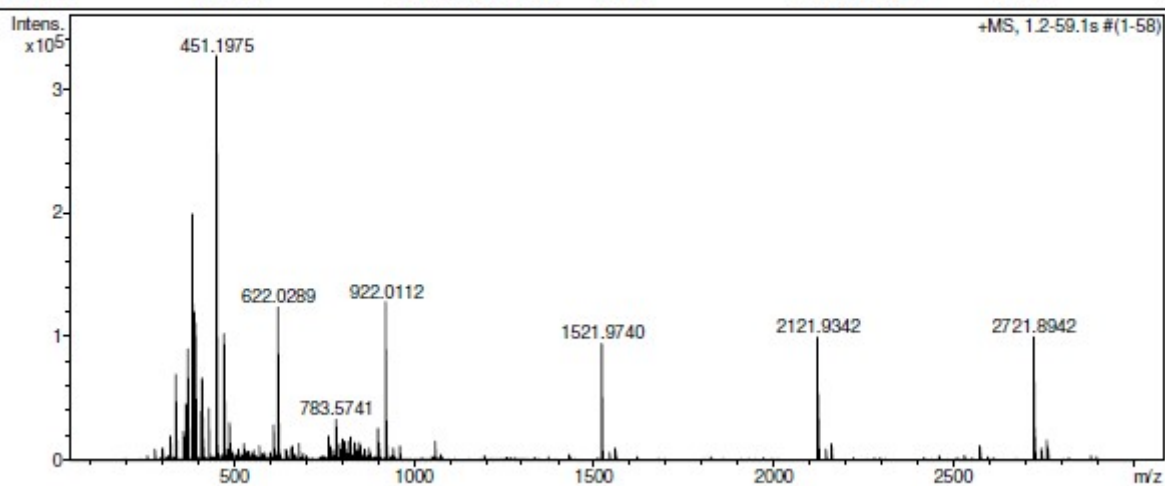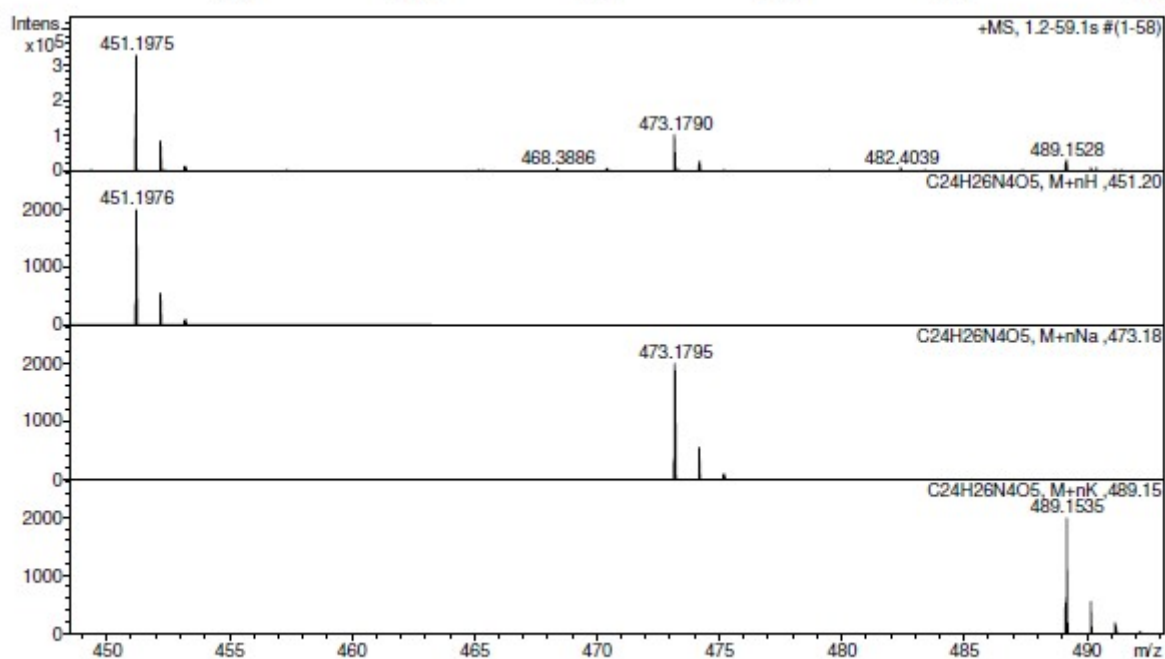

HRMS for compound **16a**

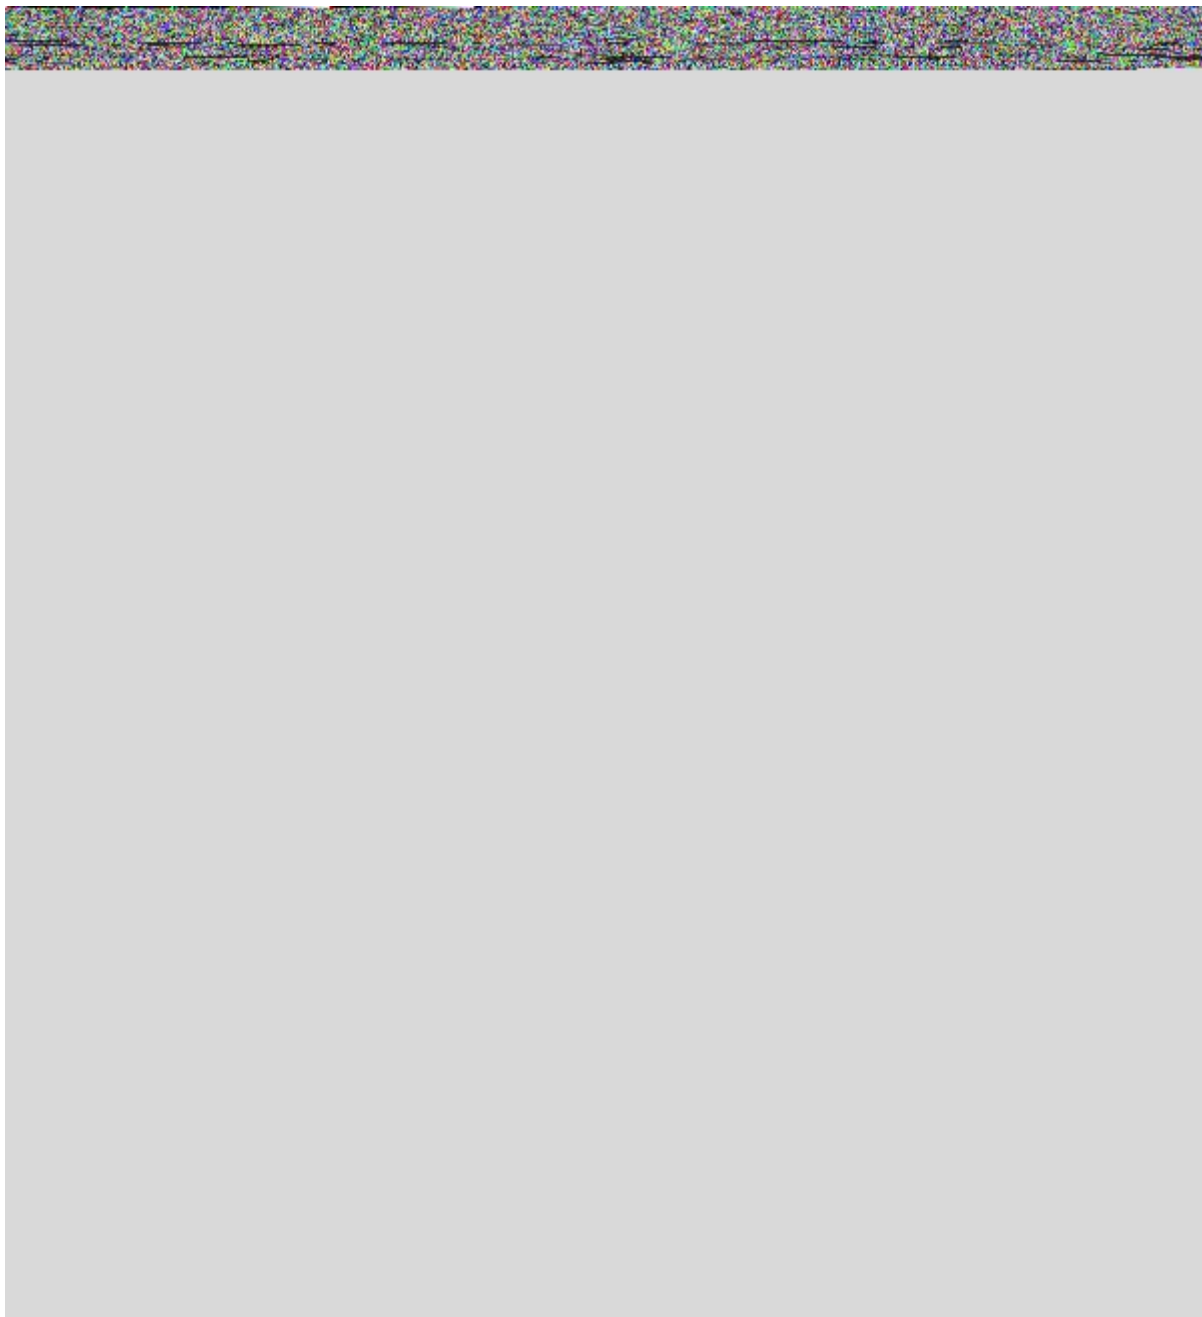



HRMS for compound **16b**

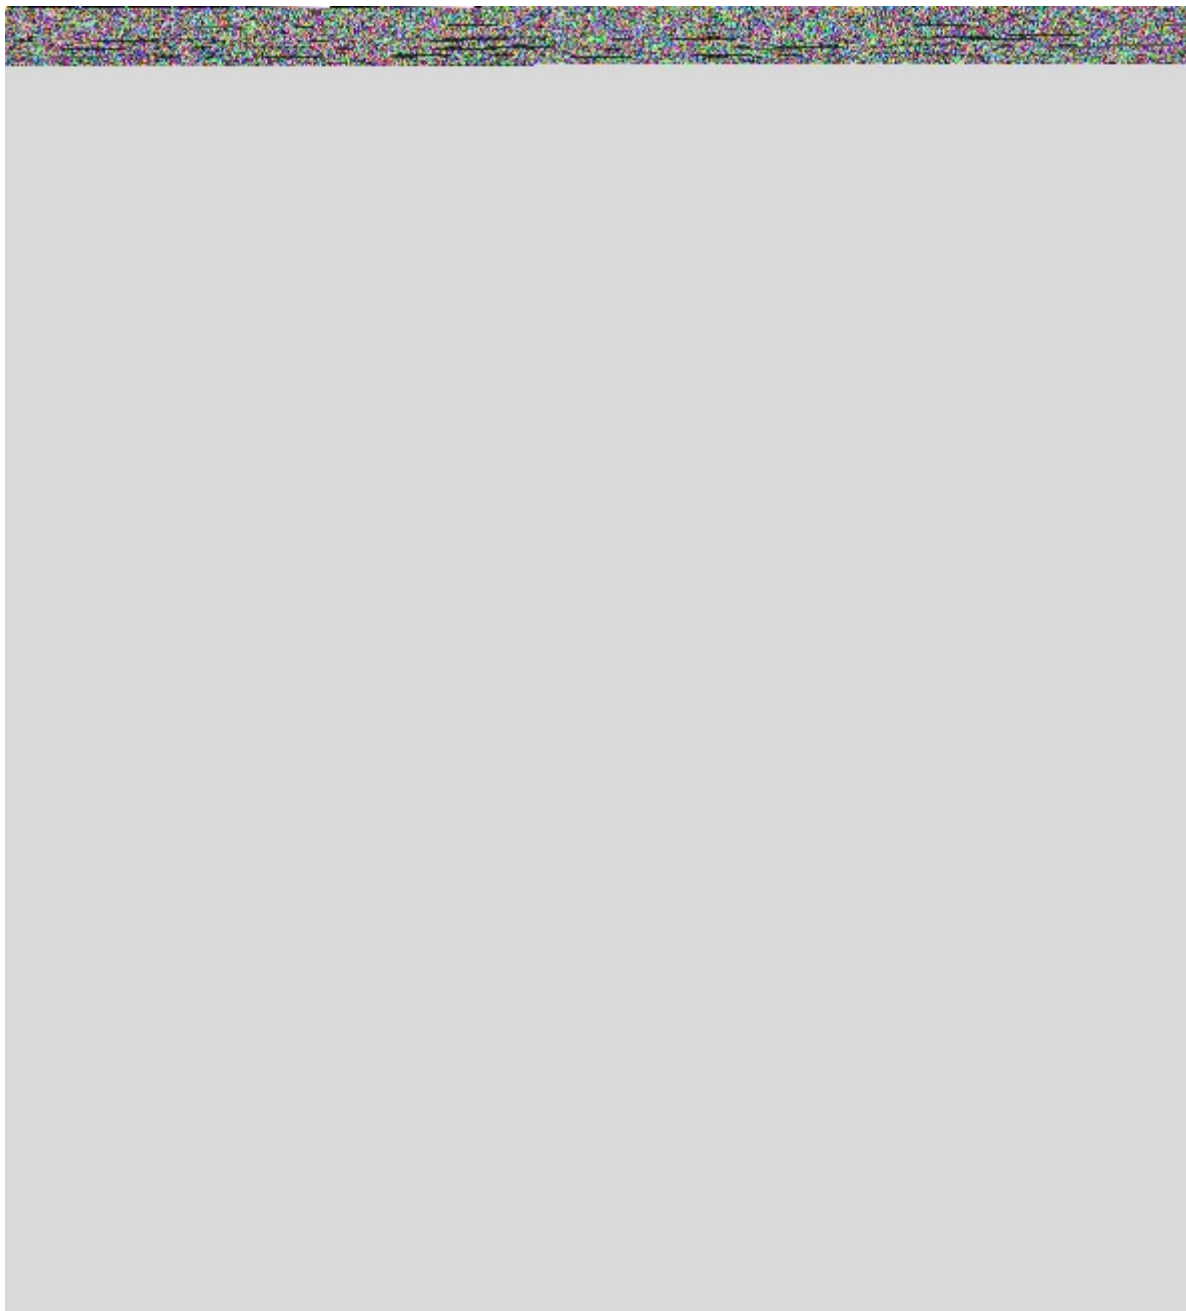

HRMS for compound **17**

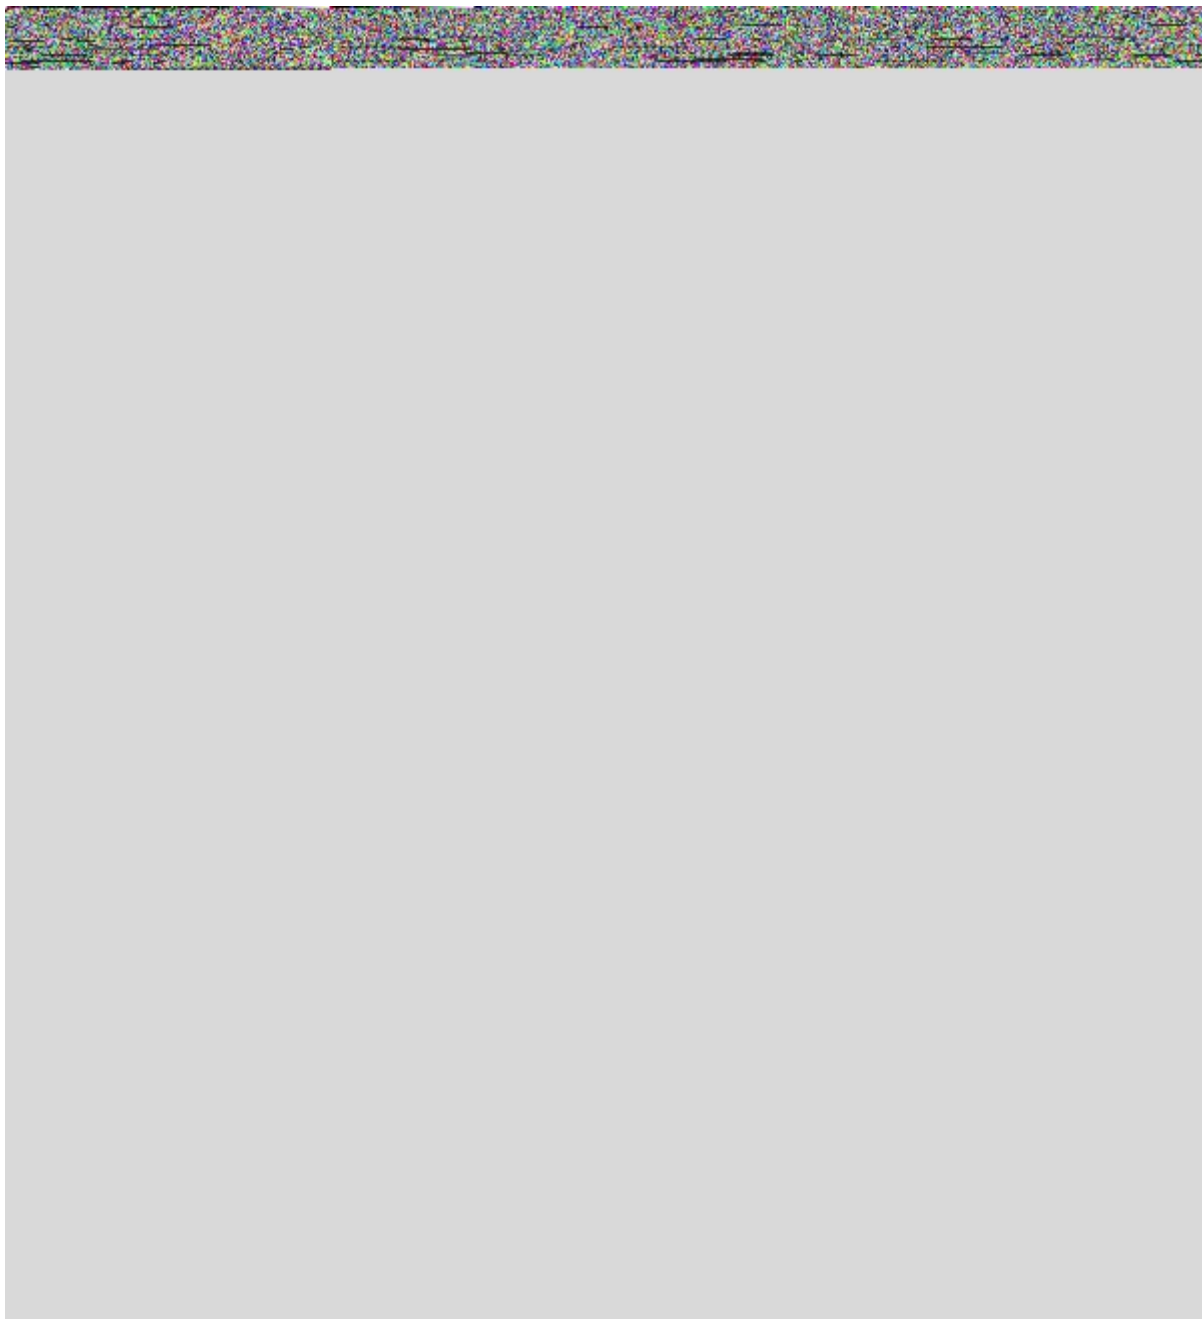

HRMS for compound **18a**

**Acquisition Parameter**

|             |            |                      |          |                  |           |
|-------------|------------|----------------------|----------|------------------|-----------|
| Source Type | ESI        | Ion Polarity         | Positive | Set Nebulizer    | 0.4 Bar   |
| Focus       | Not active |                      |          | Set Dry Heater   | 180 °C    |
| Scan Begin  | 50 m/z     | Set Capillary        | 4500 V   | Set Dry Gas      | 4.0 l/min |
| Scan End    | 3000 m/z   | Set End Plate Offset | -500 V   | Set Divert Valve | Waste     |

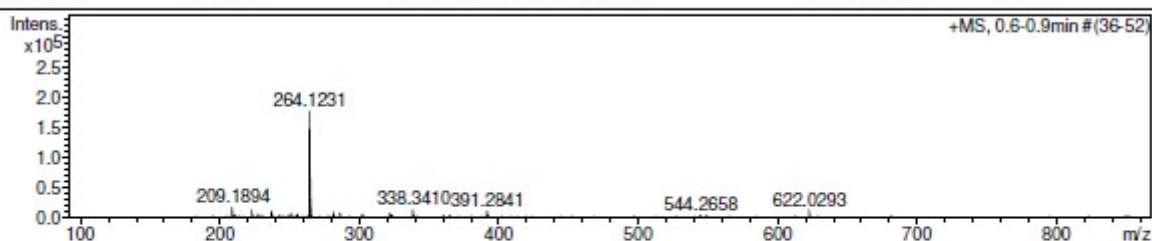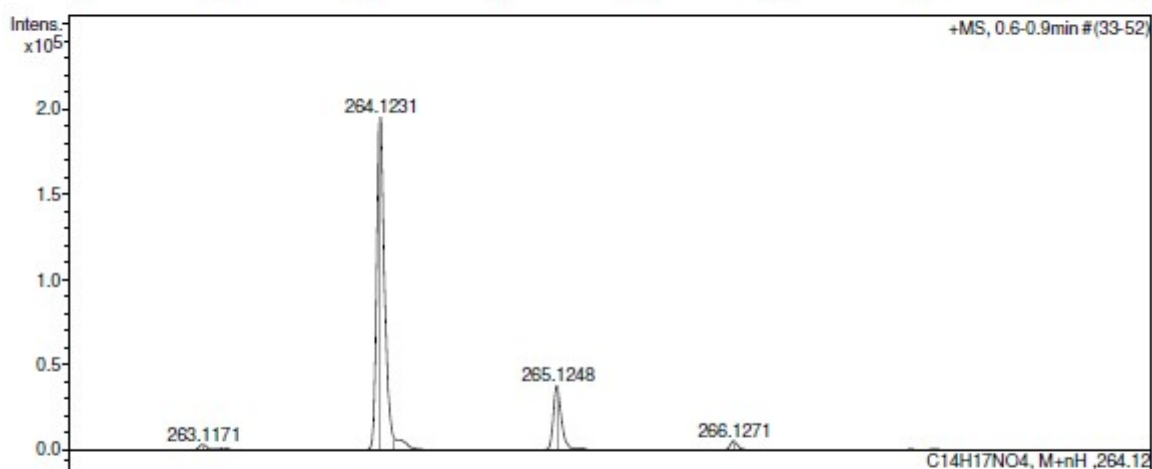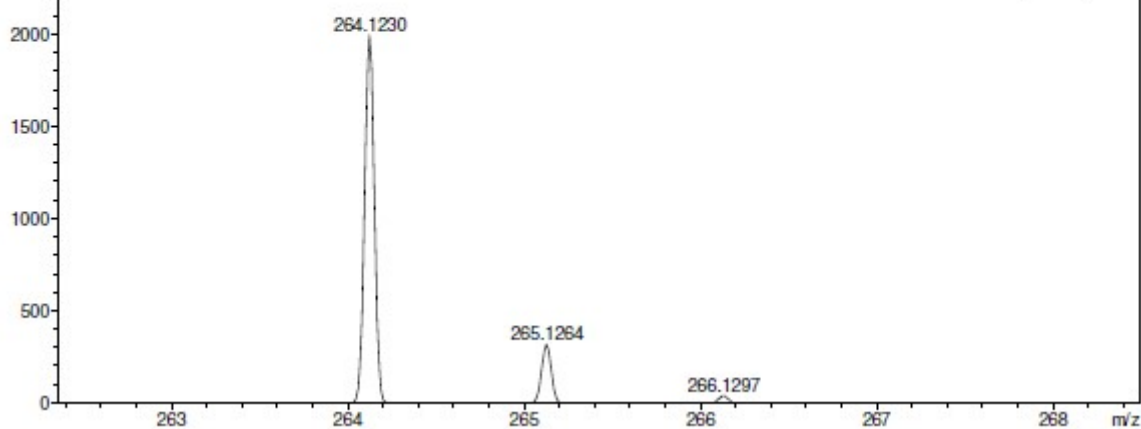

# HRMS for compound **18b**

## Acquisition Parameter

|             |            |                      |          |                  |           |
|-------------|------------|----------------------|----------|------------------|-----------|
| Source Type | ESI        | Ion Polarity         | Positive | Set Nebulizer    | 0.4 Bar   |
| Focus       | Not active |                      |          | Set Dry Heater   | 180 °C    |
| Scan Begin  | 50 m/z     | Set Capillary        | 4500 V   | Set Dry Gas      | 4.0 l/min |
| Scan End    | 3000 m/z   | Set End Plate Offset | -500 V   | Set Divert Valve | Waste     |

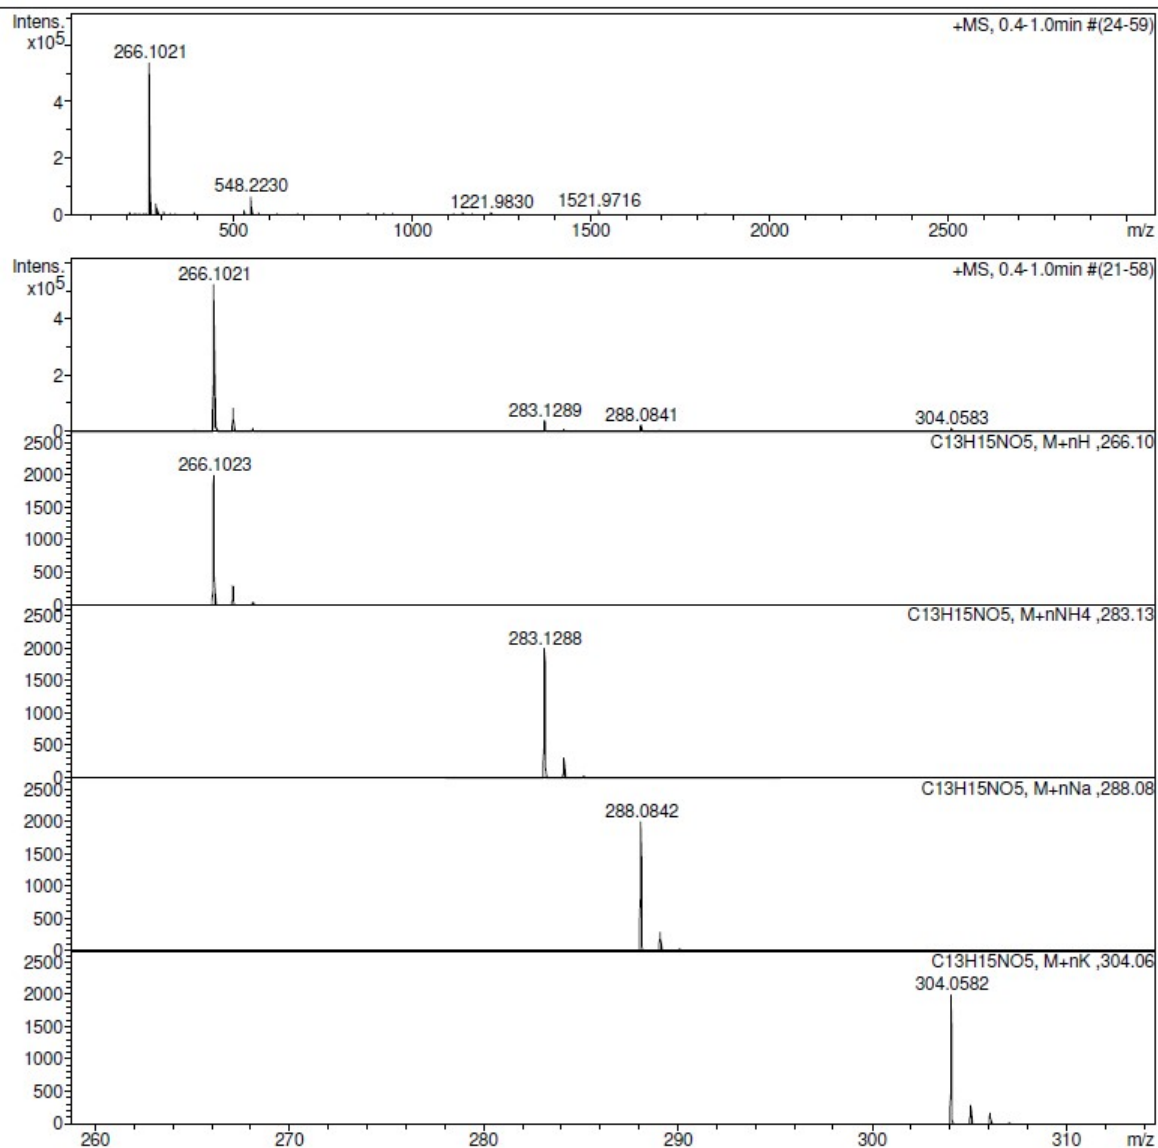

# HRMS for compound 18c

## Acquisition Parameter

|             |            |                      |          |                  |           |
|-------------|------------|----------------------|----------|------------------|-----------|
| Source Type | ESI        | Ion Polarity         | Positive | Set Nebulizer    | 0.4 Bar   |
| Focus       | Not active |                      |          | Set Dry Heater   | 180 °C    |
| Scan Begin  | 50 m/z     | Set Capillary        | 4500 V   | Set Dry Gas      | 4.0 l/min |
| Scan End    | 3000 m/z   | Set End Plate Offset | -500 V   | Set Divert Valve | Waste     |

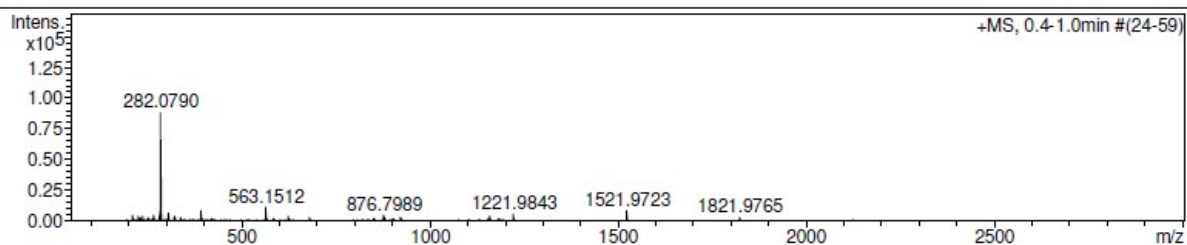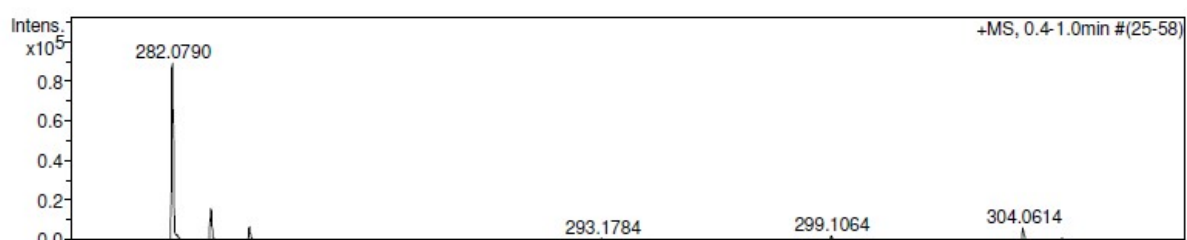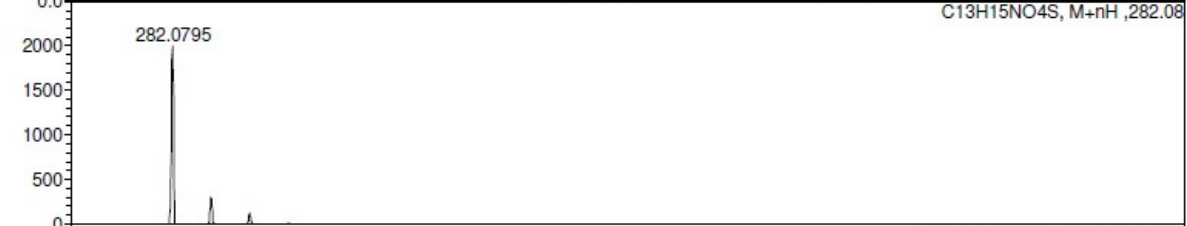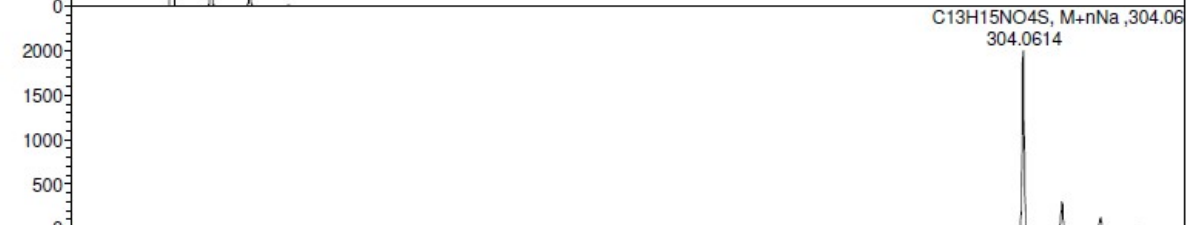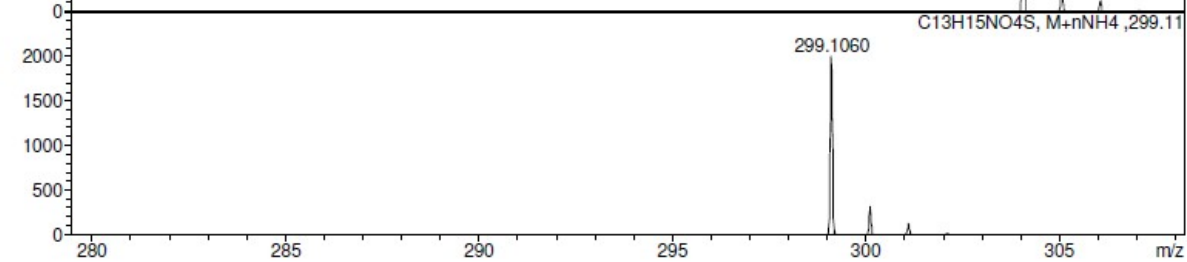

# HRMS for compound 19

## Acquisition Parameter

|             |            |                      |          |                  |           |
|-------------|------------|----------------------|----------|------------------|-----------|
| Source Type | ESI        | Ion Polarity         | Positive | Set Nebulizer    | 0.4 Bar   |
| Focus       | Not active |                      |          | Set Dry Heater   | 180 °C    |
| Scan Begin  | 50 m/z     | Set Capillary        | 4500 V   | Set Dry Gas      | 4.0 l/min |
| Scan End    | 3000 m/z   | Set End Plate Offset | -500 V   | Set Divert Valve | Waste     |

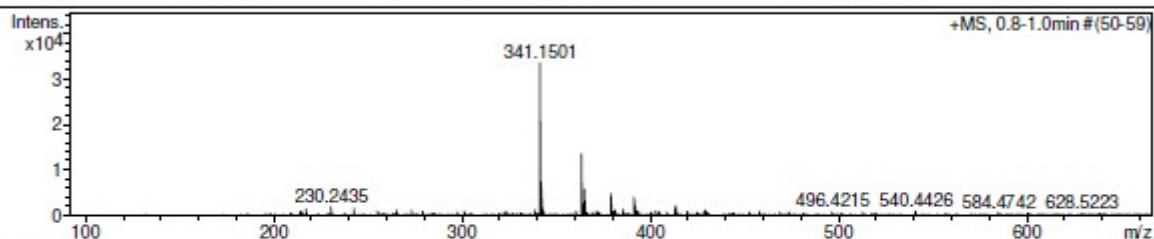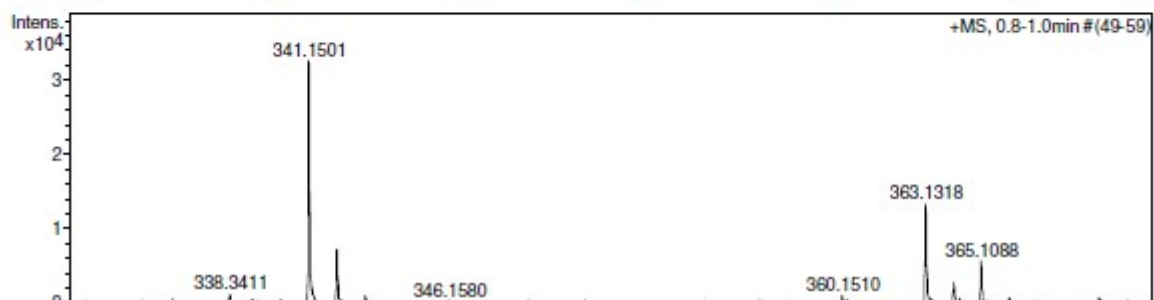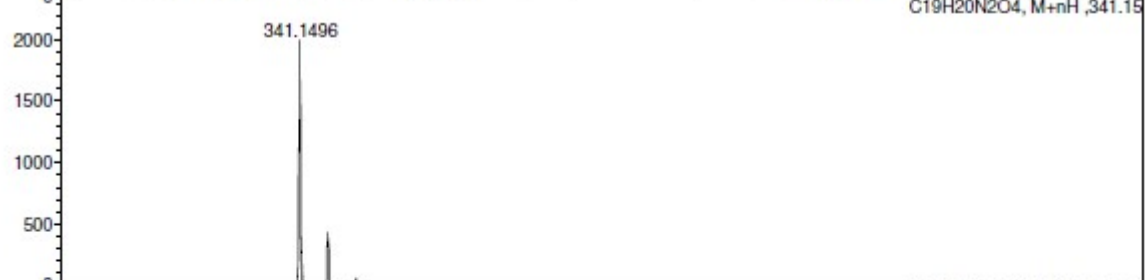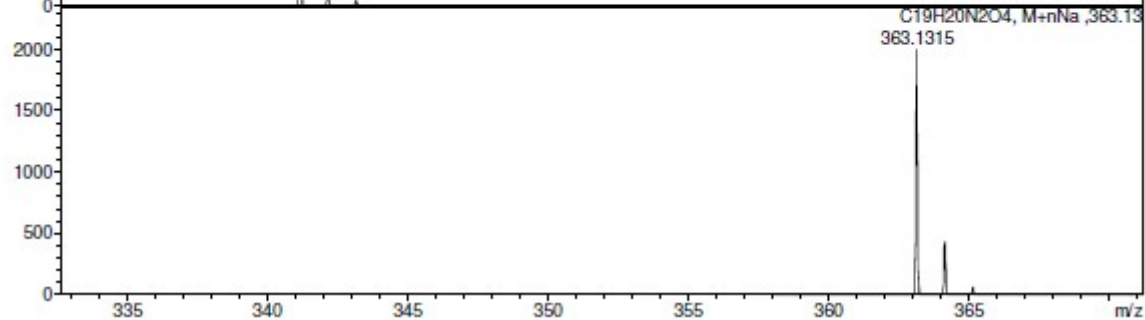

## 8. X-ray crystallographic data and refinement details

### 8.1 Compound 7a

X-ray diffraction data were collected at 100K on a Bruker Quest D8 diffractometer equipped with a Photon-III area-detector (graphite monochromator, shutterless  $\phi$ - and  $\omega$ -scan technique), using Mo  $K_{\alpha}$ -radiation. The intensity data were integrated by the SAINT program<sup>2</sup> and were corrected for absorption and decay using SADABS.<sup>3</sup> The structure was solved by direct methods using SHELXT<sup>4</sup> and refined on  $F^2$  using SHELXL-2018.<sup>5</sup> All non-hydrogen atoms were refined with individual anisotropic displacement parameters. Locations of atoms H1, H2 and H3 were found from the electron density-difference map; these hydrogen atoms were refined with individual isotropic displacement parameters. All other hydrogen atoms were placed in ideal calculated positions and refined as riding atoms with relative isotropic displacement parameters. The SHELXTL program suite<sup>1</sup> was used for molecular graphics.

**Table S1.** Crystal data and structure refinement for **7a**

|                                 |                                                               |          |
|---------------------------------|---------------------------------------------------------------|----------|
| Identification code             | <b>7a</b>                                                     |          |
| Empirical formula               | C <sub>20</sub> H <sub>24</sub> N <sub>2</sub> O <sub>4</sub> |          |
| Formula weight                  | 356.41                                                        |          |
| Temperature                     | 100(2) K                                                      |          |
| Wavelength                      | 0.71073 Å                                                     |          |
| Crystal system                  | Orthorhombic                                                  |          |
| Space group                     | P2 <sub>1</sub> 2 <sub>1</sub> 2 <sub>1</sub>                 |          |
| Unit cell dimensions            | a = 9.1768(3) Å                                               | a = 90°. |
|                                 | b = 9.4700(3) Å                                               | b = 90°. |
|                                 | c = 21.5491(8) Å                                              | c = 90°. |
| Volume                          | 1872.71(11) Å <sup>3</sup>                                    |          |
| Z                               | 4                                                             |          |
| Density (calculated)            | 1.264 g/cm <sup>3</sup>                                       |          |
| Absorption coefficient          | 0.088 mm <sup>-1</sup>                                        |          |
| F(000)                          | 760                                                           |          |
| Crystal size                    | 0.867 x 0.80 x 0.302 mm <sup>3</sup>                          |          |
| Theta range for data collection | 2.349 to 33.738°.                                             |          |

|                                   |                                             |
|-----------------------------------|---------------------------------------------|
| Index ranges                      | -13<=h<=14, -14<=k<=14, -33<=l<=33          |
| Reflections collected             | 54599                                       |
| Independent reflections           | 7492 [R(int) = 0.0316]                      |
| Observed reflections              | 7058                                        |
| Completeness to theta = 25.242°   | 99.9 %                                      |
| Absorption correction             | Semi-empirical from equivalents             |
| Max. and min. transmission        | 0.7467 and 0.6797                           |
| Refinement method                 | Full-matrix least-squares on F <sup>2</sup> |
| Data / restraints / parameters    | 7492 / 0 / 248                              |
| Goodness-of-fit on F <sup>2</sup> | 1.062                                       |
| Final R indices [I>2sigma(I)]     | R1 = 0.0332, wR2 = 0.0860                   |
| R indices (all data)              | R1 = 0.0367, wR2 = 0.0889                   |
| Absolute structure parameter      | -0.11(15)                                   |
| Largest diff. peak and hole       | 0.327 and -0.235 e.Å <sup>-3</sup>          |
| CCDC                              | 2270304                                     |

---



**Table S2.** Atomic coordinates ( $\times 10^4$ ) and equivalent isotropic displacement parameters ( $\text{\AA}^2 \times 10^3$ ) for **7a**.  $U(\text{eq})$  is defined as one third of the trace of the orthogonalized  $U^{\text{ij}}$  tensor.

|       | x        | y       | z       | U(eq) |
|-------|----------|---------|---------|-------|
| O(1)  | 4854(1)  | 3652(1) | 3653(1) | 14(1) |
| O(2)  | 5520(1)  | 35(1)   | 3228(1) | 20(1) |
| O(3)  | 8085(1)  | 1319(1) | 2906(1) | 19(1) |
| O(4)  | 3096(1)  | 3175(1) | 2513(1) | 18(1) |
| N(1)  | 704(1)   | 2592(1) | 2516(1) | 16(1) |
| N(2)  | 353(1)   | 3677(1) | 2092(1) | 16(1) |
| C(1)  | 4645(1)  | 2234(1) | 3575(1) | 12(1) |
| C(2)  | 5723(1)  | 1436(1) | 3318(1) | 13(1) |
| C(3)  | 7080(1)  | 2075(1) | 3127(1) | 13(1) |
| C(4)  | 7186(1)  | 3573(1) | 3199(1) | 15(1) |
| C(5)  | 6079(1)  | 4303(1) | 3462(1) | 16(1) |
| C(6)  | 3137(1)  | 1731(1) | 3763(1) | 12(1) |
| C(7)  | 3220(1)  | 443(1)  | 4207(1) | 16(1) |
| C(8)  | 3801(1)  | 821(2)  | 4850(1) | 22(1) |
| C(9)  | 2889(1)  | 1982(2) | 5153(1) | 24(1) |
| C(10) | 2828(1)  | 3280(1) | 4735(1) | 20(1) |
| C(11) | 2251(1)  | 2901(1) | 4088(1) | 16(1) |
| C(12) | 2323(1)  | 1251(1) | 3170(1) | 14(1) |
| C(13) | 2086(1)  | 2425(1) | 2706(1) | 13(1) |
| C(14) | 37(1)    | 3204(1) | 1484(1) | 16(1) |
| C(15) | 675(1)   | 3851(1) | 971(1)  | 21(1) |
| C(16) | 266(2)   | 3452(2) | 373(1)  | 25(1) |
| C(17) | -788(2)  | 2416(1) | 282(1)  | 26(1) |
| C(18) | -1422(2) | 1776(1) | 793(1)  | 29(1) |
| C(19) | -1016(2) | 2154(1) | 1393(1) | 24(1) |
| C(20) | 6039(2)  | 5849(1) | 3585(1) | 30(1) |

**Table S3.** Bond lengths [Å] and angles [°] for **7a**.

|              |            |                 |            |
|--------------|------------|-----------------|------------|
| O(1)-C(5)    | 1.3462(13) | C(12)-H(12A)    | 0.9900     |
| O(1)-C(1)    | 1.3665(12) | C(12)-H(12B)    | 0.9900     |
| O(2)-C(2)    | 1.3531(13) | C(14)-C(15)     | 1.3927(16) |
| O(2)-H(3)    | 0.84(2)    | C(14)-C(19)     | 1.4010(16) |
| O(3)-C(3)    | 1.2613(13) | C(15)-C(16)     | 1.3933(18) |
| O(4)-C(13)   | 1.2397(13) | C(15)-H(15)     | 0.9500     |
| N(1)-C(13)   | 1.3420(13) | C(16)-C(17)     | 1.391(2)   |
| N(1)-N(2)    | 1.4115(13) | C(16)-H(16)     | 0.9500     |
| N(1)-H(1)    | 0.88(2)    | C(17)-C(18)     | 1.386(2)   |
| N(2)-C(14)   | 1.4163(15) | C(17)-H(17)     | 0.9500     |
| N(2)-H(2)    | 0.87(2)    | C(18)-C(19)     | 1.3912(18) |
| C(1)-C(2)    | 1.3630(14) | C(18)-H(18)     | 0.9500     |
| C(1)-C(6)    | 1.5191(14) | C(19)-H(19)     | 0.9500     |
| C(2)-C(3)    | 1.4447(14) | C(20)-H(20A)    | 0.9800     |
| C(3)-C(4)    | 1.4301(15) | C(20)-H(20B)    | 0.9800     |
| C(4)-C(5)    | 1.3533(15) | C(20)-H(20C)    | 0.9800     |
| C(4)-H(4)    | 0.9500     | C(5)-O(1)-C(1)  | 121.95(9)  |
| C(5)-C(20)   | 1.4888(17) | C(2)-O(2)-H(3)  | 111.8(13)  |
| C(6)-C(11)   | 1.5428(15) | C(13)-N(1)-N(2) | 119.94(9)  |
| C(6)-C(12)   | 1.5487(15) | C(13)-N(1)-H(1) | 122.8(15)  |
| C(6)-C(7)    | 1.5516(15) | N(2)-N(1)-H(1)  | 116.7(15)  |
| C(7)-C(8)    | 1.5274(17) | N(1)-N(2)-C(14) | 114.54(9)  |
| C(7)-H(7A)   | 0.9900     | N(1)-N(2)-H(2)  | 109.7(13)  |
| C(7)-H(7B)   | 0.9900     | C(14)-N(2)-H(2) | 111.8(13)  |
| C(8)-C(9)    | 1.5282(19) | C(2)-C(1)-O(1)  | 119.58(9)  |
| C(8)-H(8A)   | 0.9900     | C(2)-C(1)-C(6)  | 126.54(9)  |
| C(8)-H(8B)   | 0.9900     | O(1)-C(1)-C(6)  | 113.79(8)  |
| C(9)-C(10)   | 1.5251(18) | O(2)-C(2)-C(1)  | 120.15(9)  |
| C(9)-H(9A)   | 0.9900     | O(2)-C(2)-C(3)  | 119.26(9)  |
| C(9)-H(9B)   | 0.9900     | C(1)-C(2)-C(3)  | 120.58(9)  |
| C(10)-C(11)  | 1.5341(16) | O(3)-C(3)-C(4)  | 123.68(10) |
| C(10)-H(10A) | 0.9900     | O(3)-C(3)-C(2)  | 120.00(10) |
| C(10)-H(10B) | 0.9900     | C(4)-C(3)-C(2)  | 116.31(9)  |
| C(11)-H(11A) | 0.9900     | C(5)-C(4)-C(3)  | 120.08(9)  |
| C(11)-H(11B) | 0.9900     | C(5)-C(4)-H(4)  | 120.0      |
| C(12)-C(13)  | 1.5108(15) | C(3)-C(4)-H(4)  | 120.0      |

|                     |            |                     |            |
|---------------------|------------|---------------------|------------|
| O(1)-C(5)-C(4)      | 121.41(10) | C(10)-C(11)-H(11B)  | 108.9      |
| O(1)-C(5)-C(20)     | 112.06(10) | C(6)-C(11)-H(11B)   | 108.9      |
| C(4)-C(5)-C(20)     | 126.53(10) | H(11A)-C(11)-H(11B) | 107.7      |
| C(1)-C(6)-C(11)     | 112.06(8)  | C(13)-C(12)-C(6)    | 113.56(9)  |
| C(1)-C(6)-C(12)     | 108.15(8)  | C(13)-C(12)-H(12A)  | 108.9      |
| C(11)-C(6)-C(12)    | 109.37(8)  | C(6)-C(12)-H(12A)   | 108.9      |
| C(1)-C(6)-C(7)      | 111.47(8)  | C(13)-C(12)-H(12B)  | 108.9      |
| C(11)-C(6)-C(7)     | 108.11(8)  | C(6)-C(12)-H(12B)   | 108.9      |
| C(12)-C(6)-C(7)     | 107.58(8)  | H(12A)-C(12)-H(12B) | 107.7      |
| C(8)-C(7)-C(6)      | 113.10(9)  | O(4)-C(13)-N(1)     | 122.47(10) |
| C(8)-C(7)-H(7A)     | 109.0      | O(4)-C(13)-C(12)    | 122.39(9)  |
| C(6)-C(7)-H(7A)     | 109.0      | N(1)-C(13)-C(12)    | 115.14(9)  |
| C(8)-C(7)-H(7B)     | 109.0      | C(15)-C(14)-C(19)   | 119.43(11) |
| C(6)-C(7)-H(7B)     | 109.0      | C(15)-C(14)-N(2)    | 120.69(10) |
| H(7A)-C(7)-H(7B)    | 107.8      | C(19)-C(14)-N(2)    | 119.67(10) |
| C(7)-C(8)-C(9)      | 111.42(10) | C(14)-C(15)-C(16)   | 120.08(12) |
| C(7)-C(8)-H(8A)     | 109.3      | C(14)-C(15)-H(15)   | 120.0      |
| C(9)-C(8)-H(8A)     | 109.3      | C(16)-C(15)-H(15)   | 120.0      |
| C(7)-C(8)-H(8B)     | 109.3      | C(17)-C(16)-C(15)   | 120.57(12) |
| C(9)-C(8)-H(8B)     | 109.3      | C(17)-C(16)-H(16)   | 119.7      |
| H(8A)-C(8)-H(8B)    | 108.0      | C(15)-C(16)-H(16)   | 119.7      |
| C(10)-C(9)-C(8)     | 110.35(9)  | C(18)-C(17)-C(16)   | 119.23(12) |
| C(10)-C(9)-H(9A)    | 109.6      | C(18)-C(17)-H(17)   | 120.4      |
| C(8)-C(9)-H(9A)     | 109.6      | C(16)-C(17)-H(17)   | 120.4      |
| C(10)-C(9)-H(9B)    | 109.6      | C(17)-C(18)-C(19)   | 120.86(13) |
| C(8)-C(9)-H(9B)     | 109.6      | C(17)-C(18)-H(18)   | 119.6      |
| H(9A)-C(9)-H(9B)    | 108.1      | C(19)-C(18)-H(18)   | 119.6      |
| C(9)-C(10)-C(11)    | 111.14(10) | C(18)-C(19)-C(14)   | 119.82(12) |
| C(9)-C(10)-H(10A)   | 109.4      | C(18)-C(19)-H(19)   | 120.1      |
| C(11)-C(10)-H(10A)  | 109.4      | C(14)-C(19)-H(19)   | 120.1      |
| C(9)-C(10)-H(10B)   | 109.4      | C(5)-C(20)-H(20A)   | 109.5      |
| C(11)-C(10)-H(10B)  | 109.4      | C(5)-C(20)-H(20B)   | 109.5      |
| H(10A)-C(10)-H(10B) | 108.0      | H(20A)-C(20)-H(20B) | 109.5      |
| C(10)-C(11)-C(6)    | 113.51(9)  | C(5)-C(20)-H(20C)   | 109.5      |
| C(10)-C(11)-H(11A)  | 108.9      | H(20A)-C(20)-H(20C) | 109.5      |
| C(6)-C(11)-H(11A)   | 108.9      | H(20B)-C(20)-H(20C) | 109.5      |

**Table S4.** Anisotropic displacement parameters ( $\text{\AA}^2 \times 10^3$ ) for **7a**. The anisotropic displacement factor exponent takes the form:  $-2p^2[h^2 a^{*2}U^{11} + \dots + 2hk a^* b^* U^{12}]$

|       | U <sup>11</sup> | U <sup>22</sup> | U <sup>33</sup> | U <sup>23</sup> | U <sup>13</sup> | U <sup>12</sup> |
|-------|-----------------|-----------------|-----------------|-----------------|-----------------|-----------------|
| O(1)  | 15(1)           | 10(1)           | 17(1)           | -1(1)           | 4(1)            | -2(1)           |
| O(2)  | 16(1)           | 11(1)           | 34(1)           | -5(1)           | 11(1)           | -1(1)           |
| O(3)  | 11(1)           | 17(1)           | 30(1)           | 3(1)            | 6(1)            | 2(1)            |
| O(4)  | 11(1)           | 22(1)           | 21(1)           | 6(1)            | 0(1)            | -4(1)           |
| N(1)  | 10(1)           | 19(1)           | 19(1)           | 5(1)            | -1(1)           | -2(1)           |
| N(2)  | 14(1)           | 14(1)           | 20(1)           | 3(1)            | -3(1)           | -2(1)           |
| C(1)  | 10(1)           | 11(1)           | 14(1)           | 0(1)            | 1(1)            | -1(1)           |
| C(2)  | 10(1)           | 11(1)           | 18(1)           | 0(1)            | 2(1)            | -1(1)           |
| C(3)  | 10(1)           | 14(1)           | 16(1)           | 2(1)            | 1(1)            | 0(1)            |
| C(4)  | 13(1)           | 15(1)           | 17(1)           | 2(1)            | 2(1)            | -3(1)           |
| C(5)  | 18(1)           | 13(1)           | 16(1)           | 1(1)            | 4(1)            | -4(1)           |
| C(6)  | 10(1)           | 12(1)           | 15(1)           | 1(1)            | 1(1)            | 0(1)            |
| C(7)  | 14(1)           | 16(1)           | 19(1)           | 5(1)            | 2(1)            | 0(1)            |
| C(8)  | 20(1)           | 28(1)           | 18(1)           | 6(1)            | -1(1)           | 3(1)            |
| C(9)  | 23(1)           | 32(1)           | 16(1)           | 2(1)            | 4(1)            | 1(1)            |
| C(10) | 18(1)           | 23(1)           | 17(1)           | -3(1)           | 4(1)            | 1(1)            |
| C(11) | 12(1)           | 17(1)           | 18(1)           | 0(1)            | 3(1)            | 3(1)            |
| C(12) | 12(1)           | 14(1)           | 16(1)           | 2(1)            | -1(1)           | -3(1)           |
| C(13) | 11(1)           | 15(1)           | 14(1)           | 0(1)            | 0(1)            | 0(1)            |
| C(14) | 14(1)           | 13(1)           | 20(1)           | 2(1)            | -2(1)           | 1(1)            |
| C(15) | 16(1)           | 22(1)           | 23(1)           | 2(1)            | 3(1)            | -1(1)           |
| C(16) | 27(1)           | 26(1)           | 20(1)           | 3(1)            | 4(1)            | 3(1)            |
| C(17) | 40(1)           | 19(1)           | 21(1)           | -2(1)           | -4(1)           | 3(1)            |
| C(18) | 42(1)           | 18(1)           | 25(1)           | 2(1)            | -10(1)          | -8(1)           |
| C(19) | 31(1)           | 18(1)           | 22(1)           | 4(1)            | -6(1)           | -9(1)           |
| C(20) | 38(1)           | 13(1)           | 38(1)           | -4(1)           | 18(1)           | -7(1)           |

**Table S5.** Hydrogen coordinates ( $\times 10^4$ ) and isotropic displacement parameters ( $\text{\AA}^2 \times 10^3$ ) for **7a**.

|        | x        | y        | z        | U(eq) |
|--------|----------|----------|----------|-------|
| H(3)   | 6180(20) | -320(20) | 3003(9)  | 26(5) |
| H(1)   | -30(30)  | 2130(20) | 2684(11) | 45(6) |
| H(2)   | 1030(20) | 4310(20) | 2095(9)  | 25(4) |
| H(4)   | 8034     | 4056     | 3062     | 18    |
| H(7A)  | 2235     | 29       | 4251     | 19    |
| H(7B)  | 3860     | -284     | 4020     | 19    |
| H(8A)  | 4823     | 1143     | 4814     | 26    |
| H(8B)  | 3787     | -31      | 5116     | 26    |
| H(9A)  | 1889     | 1629     | 5228     | 28    |
| H(9B)  | 3322     | 2241     | 5558     | 28    |
| H(10A) | 3816     | 3690     | 4697     | 24    |
| H(10B) | 2186     | 4000     | 4926     | 24    |
| H(11A) | 2265     | 3759     | 3826     | 19    |
| H(11B) | 1225     | 2589     | 4126     | 19    |
| H(12A) | 2889     | 488      | 2968     | 17    |
| H(12B) | 1365     | 856      | 3290     | 17    |
| H(15)  | 1390     | 4564     | 1028     | 25    |
| H(16)  | 711      | 3891     | 25       | 30    |
| H(17)  | -1069    | 2152     | -126     | 32    |
| H(18)  | -2144    | 1069     | 734      | 34    |
| H(19)  | -1452    | 1701     | 1740     | 28    |
| H(20A) | 6991     | 6263     | 3488     | 45    |
| H(20B) | 5810     | 6014     | 4023     | 45    |
| H(20C) | 5290     | 6289     | 3325     | 45    |

**Table S6.** Torsion angles [°] for **7a**.

---

|                       |             |                         |             |
|-----------------------|-------------|-------------------------|-------------|
| C(13)-N(1)-N(2)-C(14) | 107.03(12)  | C(12)-C(6)-C(7)-C(8)    | -171.63(9)  |
| C(5)-O(1)-C(1)-C(2)   | 2.40(15)    | C(6)-C(7)-C(8)-C(9)     | 56.52(13)   |
| C(5)-O(1)-C(1)-C(6)   | -174.27(9)  | C(7)-C(8)-C(9)-C(10)    | -56.12(14)  |
| O(1)-C(1)-C(2)-O(2)   | -178.84(10) | C(8)-C(9)-C(10)-C(11)   | 55.68(13)   |
| C(6)-C(1)-C(2)-O(2)   | -2.64(16)   | C(9)-C(10)-C(11)-C(6)   | -56.31(12)  |
| O(1)-C(1)-C(2)-C(3)   | 0.03(15)    | C(1)-C(6)-C(11)-C(10)   | -69.65(11)  |
| C(6)-C(1)-C(2)-C(3)   | 176.23(10)  | C(12)-C(6)-C(11)-C(10)  | 170.44(9)   |
| O(2)-C(2)-C(3)-O(3)   | -3.19(16)   | C(7)-C(6)-C(11)-C(10)   | 53.58(11)   |
| C(1)-C(2)-C(3)-O(3)   | 177.93(10)  | C(1)-C(6)-C(12)-C(13)   | -62.63(11)  |
| O(2)-C(2)-C(3)-C(4)   | 176.17(10)  | C(11)-C(6)-C(12)-C(13)  | 59.65(11)   |
| C(1)-C(2)-C(3)-C(4)   | -2.71(15)   | C(7)-C(6)-C(12)-C(13)   | 176.84(8)   |
| O(3)-C(3)-C(4)-C(5)   | -177.49(11) | N(2)-N(1)-C(13)-O(4)    | -1.65(17)   |
| C(2)-C(3)-C(4)-C(5)   | 3.17(15)    | N(2)-N(1)-C(13)-C(12)   | 178.71(9)   |
| C(1)-O(1)-C(5)-C(4)   | -1.94(16)   | C(6)-C(12)-C(13)-O(4)   | 53.05(14)   |
| C(1)-O(1)-C(5)-C(20)  | 178.75(11)  | C(6)-C(12)-C(13)-N(1)   | -127.31(10) |
| C(3)-C(4)-C(5)-O(1)   | -0.97(17)   | N(1)-N(2)-C(14)-C(15)   | -132.17(11) |
| C(3)-C(4)-C(5)-C(20)  | 178.23(13)  | N(1)-N(2)-C(14)-C(19)   | 53.11(14)   |
| C(2)-C(1)-C(6)-C(11)  | 175.39(10)  | C(19)-C(14)-C(15)-C(16) | -0.03(18)   |
| O(1)-C(1)-C(6)-C(11)  | -8.21(12)   | N(2)-C(14)-C(15)-C(16)  | -174.76(11) |
| C(2)-C(1)-C(6)-C(12)  | -63.99(13)  | C(14)-C(15)-C(16)-C(17) | 0.51(19)    |
| O(1)-C(1)-C(6)-C(12)  | 112.40(10)  | C(15)-C(16)-C(17)-C(18) | -0.4(2)     |
| C(2)-C(1)-C(6)-C(7)   | 54.07(14)   | C(16)-C(17)-C(18)-C(19) | -0.1(2)     |
| O(1)-C(1)-C(6)-C(7)   | -129.53(9)  | C(17)-C(18)-C(19)-C(14) | 0.6(2)      |
| C(1)-C(6)-C(7)-C(8)   | 69.97(11)   | C(15)-C(14)-C(19)-C(18) | -0.5(2)     |
| C(11)-C(6)-C(7)-C(8)  | -53.62(11)  | N(2)-C(14)-C(19)-C(18)  | 174.27(12)  |

---

**Table S7.** Hydrogen bonds for **7a** [Å and °].

| D-H...A            | d(D-H)  | d(H...A) | d(D...A)   | <(DHA)    |
|--------------------|---------|----------|------------|-----------|
| N(1)-H(1)...O(3)#1 | 0.88(2) | 1.95(2)  | 2.8168(12) | 167(2)    |
| N(2)-H(2)...O(3)#2 | 0.87(2) | 2.07(2)  | 2.8834(13) | 157.0(17) |

Symmetry transformations used to generate equivalent atoms:

#1  $x-1, y, z$  #2  $-x+1, y+1/2, -z+1/2$

## 8.2 Compound 8a

X-ray diffraction data were collected at 100K on a four-circle Rigaku Synergy S diffractometer equipped with a HyPix6000HE area-detector (kappa geometry, shutterless  $\omega$ -scan technique), using graphite monochromatized Cu  $K_{\alpha}$ -radiation. The intensity data were integrated and corrected for absorption and decay by the CrysAlisPro program.<sup>6</sup> The structure was solved by direct methods using SHELXT<sup>4</sup> and refined on  $F^2$  using SHELXL-2018<sup>5</sup> in the OLEX2 program.<sup>7</sup> All non-hydrogen atoms were refined with individual anisotropic displacement parameters. Locations of amino and hydroxy hydrogen atoms (H2 and H4) were found from the electron density-difference map; these hydrogen atoms were refined with individual isotropic displacement parameters. All other hydrogen atoms were placed in ideal calculated positions and refined as riding atoms with relative isotropic displacement parameters.

**Table S8.** Crystal data and structure refinement for **8a**.

---

|                                   |                                                                                                                   |
|-----------------------------------|-------------------------------------------------------------------------------------------------------------------|
| Identification code               | <b>8a</b>                                                                                                         |
| Empirical formula                 | C <sub>21</sub> H <sub>22</sub> N <sub>2</sub> O <sub>5</sub>                                                     |
| Formula weight                    | 382.40                                                                                                            |
| Temperature                       | 99.99(10) K                                                                                                       |
| Wavelength                        | 1.54184 Å                                                                                                         |
| Crystal system                    | Monoclinic                                                                                                        |
| Space group                       | P2 <sub>1</sub> /c                                                                                                |
| Unit cell dimensions              | a = 11.69260(10) Å      a = 90°.<br>b = 11.74390(10) Å      b = 97.3170(10)°.<br>c = 13.59140(10) Å      g = 90°. |
| Volume                            | 1851.13(3) Å <sup>3</sup>                                                                                         |
| Z                                 | 4                                                                                                                 |
| Density (calculated)              | 1.372 Mg/m <sup>3</sup>                                                                                           |
| Absorption coefficient            | 0.814 mm <sup>-1</sup>                                                                                            |
| F(000)                            | 808                                                                                                               |
| Crystal size                      | 0.5 x 0.3 x 0.2 mm <sup>3</sup>                                                                                   |
| Theta range for data collection   | 3.811 to 77.762°.                                                                                                 |
| Index ranges                      | -13 ≤ h ≤ 14, -14 ≤ k ≤ 14, -17 ≤ l ≤ 17                                                                          |
| Reflections collected             | 22156                                                                                                             |
| Independent reflections           | 3929 [R(int) = 0.0539]                                                                                            |
| Completeness to theta = 67.684°   | 100.0 %                                                                                                           |
| Absorption correction             | Semi-empirical from equivalents                                                                                   |
| Max. and min. transmission        | 1.00000 and 0.78483                                                                                               |
| Refinement method                 | Full-matrix least-squares on F <sup>2</sup>                                                                       |
| Data / restraints / parameters    | 3929 / 0 / 262                                                                                                    |
| Goodness-of-fit on F <sup>2</sup> | 1.031                                                                                                             |
| Final R indices [I > 2σ(I)]       | R1 = 0.0390, wR2 = 0.1034                                                                                         |
| R indices (all data)              | R1 = 0.0406, wR2 = 0.1050                                                                                         |
| Largest diff. peak and hole       | 0.266 and -0.206 e.Å <sup>-3</sup>                                                                                |
| CCDC                              | 2270314                                                                                                           |

---



**Table S9.** Atomic coordinates ( $\times 10^4$ ) and equivalent isotropic displacement parameters ( $\text{\AA}^2 \times 10^3$ ) for **8a**.  $U(\text{eq})$  is defined as one third of the trace of the orthogonalized  $U^{\text{ij}}$  tensor.

|       | x        | y       | z       | U(eq) |
|-------|----------|---------|---------|-------|
| O(1)  | 9267(1)  | 6382(1) | 4555(1) | 23(1) |
| O(2)  | 5296(1)  | 3371(1) | 3835(1) | 20(1) |
| O(3)  | 3590(1)  | 2530(1) | 3409(1) | 24(1) |
| O(4)  | 5765(1)  | 5195(1) | 1834(1) | 22(1) |
| O(5)  | 2732(1)  | 3087(1) | 1358(1) | 29(1) |
| N(1)  | 7694(1)  | 5391(1) | 3813(1) | 18(1) |
| N(2)  | 7689(1)  | 5896(1) | 2873(1) | 18(1) |
| C(1)  | 8500(1)  | 5709(1) | 4618(1) | 19(1) |
| C(2)  | 8199(1)  | 5065(1) | 5499(1) | 23(1) |
| C(3)  | 7280(1)  | 4177(1) | 5099(1) | 19(1) |
| C(4)  | 6887(1)  | 4602(1) | 4044(1) | 17(1) |
| C(5)  | 7832(1)  | 2991(1) | 5004(1) | 22(1) |
| C(6)  | 8260(1)  | 2467(1) | 6014(1) | 29(1) |
| C(7)  | 7305(1)  | 2445(1) | 6683(1) | 31(1) |
| C(8)  | 6798(1)  | 3627(1) | 6798(1) | 25(1) |
| C(9)  | 6325(1)  | 4112(1) | 5779(1) | 20(1) |
| C(10) | 5959(1)  | 4208(1) | 3442(1) | 18(1) |
| C(11) | 4323(1)  | 3155(1) | 3165(1) | 19(1) |
| C(12) | 4411(1)  | 3808(1) | 2272(1) | 19(1) |
| C(13) | 5401(1)  | 4460(1) | 2449(1) | 18(1) |
| C(14) | 3540(1)  | 3757(1) | 1395(1) | 21(1) |
| C(15) | 3654(1)  | 4533(1) | 537(1)  | 30(1) |
| C(16) | 8690(1)  | 5650(1) | 2384(1) | 19(1) |
| C(17) | 9387(1)  | 4709(1) | 2616(1) | 21(1) |
| C(18) | 10301(1) | 4498(1) | 2073(1) | 25(1) |
| C(19) | 10510(1) | 5215(1) | 1310(1) | 28(1) |
| C(20) | 9803(1)  | 6155(1) | 1079(1) | 28(1) |
| C(21) | 8893(1)  | 6376(1) | 1614(1) | 23(1) |

**Table S10.** Bond lengths [Å] and angles [°] for **8a**.

|             |            |                  |            |
|-------------|------------|------------------|------------|
| O(1)-C(1)   | 1.2069(15) | C(12)-C(13)      | 1.3833(16) |
| O(2)-C(10)  | 1.4001(14) | C(12)-C(14)      | 1.4670(15) |
| O(2)-C(11)  | 1.3869(13) | C(14)-C(15)      | 1.4988(17) |
| O(3)-C(11)  | 1.2067(15) | C(15)-H(15A)     | 0.9800     |
| O(4)-H(4)   | 0.97(2)    | C(15)-H(15B)     | 0.9800     |
| O(4)-C(13)  | 1.3095(14) | C(15)-H(15C)     | 0.9800     |
| O(5)-C(14)  | 1.2257(15) | C(16)-C(17)      | 1.3862(17) |
| N(1)-N(2)   | 1.4081(13) | C(16)-C(21)      | 1.3934(17) |
| N(1)-C(1)   | 1.4003(14) | C(17)-H(17)      | 0.9500     |
| N(1)-C(4)   | 1.3865(15) | C(17)-C(18)      | 1.3957(18) |
| N(2)-H(2)   | 0.888(19)  | C(18)-H(18)      | 0.9500     |
| N(2)-C(16)  | 1.4467(15) | C(18)-C(19)      | 1.382(2)   |
| C(1)-C(2)   | 1.4969(16) | C(19)-H(19)      | 0.9500     |
| C(2)-H(2B)  | 0.9900     | C(19)-C(20)      | 1.390(2)   |
| C(2)-H(2C)  | 0.9900     | C(20)-H(20)      | 0.9500     |
| C(2)-C(3)   | 1.5447(16) | C(20)-C(21)      | 1.3881(18) |
| C(3)-C(4)   | 1.5324(15) | C(21)-H(21)      | 0.9500     |
| C(3)-C(5)   | 1.5476(16) | C(11)-O(2)-C(10) | 109.00(9)  |
| C(3)-C(9)   | 1.5396(16) | C(13)-O(4)-H(4)  | 108.4(12)  |
| C(4)-C(10)  | 1.3545(16) | C(1)-N(1)-N(2)   | 121.37(9)  |
| C(5)-H(5A)  | 0.9900     | C(4)-N(1)-N(2)   | 124.27(9)  |
| C(5)-H(5B)  | 0.9900     | C(4)-N(1)-C(1)   | 114.27(9)  |
| C(5)-C(6)   | 1.5289(16) | N(1)-N(2)-H(2)   | 108.1(11)  |
| C(6)-H(6A)  | 0.9900     | N(1)-N(2)-C(16)  | 115.03(9)  |
| C(6)-H(6B)  | 0.9900     | C(16)-N(2)-H(2)  | 111.8(11)  |
| C(6)-C(7)   | 1.5276(18) | O(1)-C(1)-N(1)   | 123.54(11) |
| C(7)-H(7A)  | 0.9900     | O(1)-C(1)-C(2)   | 129.80(10) |
| C(7)-H(7B)  | 0.9900     | N(1)-C(1)-C(2)   | 106.66(9)  |
| C(7)-C(8)   | 1.5247(19) | C(1)-C(2)-H(2B)  | 110.4      |
| C(8)-H(8A)  | 0.9900     | C(1)-C(2)-H(2C)  | 110.4      |
| C(8)-H(8B)  | 0.9900     | C(1)-C(2)-C(3)   | 106.44(9)  |
| C(8)-C(9)   | 1.5343(16) | H(2B)-C(2)-H(2C) | 108.6      |
| C(9)-H(9A)  | 0.9900     | C(3)-C(2)-H(2B)  | 110.4      |
| C(9)-H(9B)  | 0.9900     | C(3)-C(2)-H(2C)  | 110.4      |
| C(10)-C(13) | 1.4528(15) | C(2)-C(3)-C(5)   | 110.98(9)  |
| C(11)-C(12) | 1.4500(16) | C(4)-C(3)-C(2)   | 102.83(9)  |

|                  |            |                     |            |
|------------------|------------|---------------------|------------|
| C(4)-C(3)-C(5)   | 107.09(9)  | C(4)-C(10)-O(2)     | 116.67(10) |
| C(4)-C(3)-C(9)   | 115.04(9)  | C(4)-C(10)-C(13)    | 136.27(11) |
| C(9)-C(3)-C(2)   | 110.32(9)  | O(2)-C(11)-C(12)    | 108.27(9)  |
| C(9)-C(3)-C(5)   | 110.34(9)  | O(3)-C(11)-O(2)     | 118.86(10) |
| N(1)-C(4)-C(3)   | 107.32(9)  | O(3)-C(11)-C(12)    | 132.84(10) |
| C(10)-C(4)-N(1)  | 127.36(10) | C(11)-C(12)-C(14)   | 122.90(10) |
| C(10)-C(4)-C(3)  | 125.18(10) | C(13)-C(12)-C(11)   | 107.12(10) |
| C(3)-C(5)-H(5A)  | 109.1      | C(13)-C(12)-C(14)   | 129.95(11) |
| C(3)-C(5)-H(5B)  | 109.1      | O(4)-C(13)-C(10)    | 125.65(10) |
| H(5A)-C(5)-H(5B) | 107.9      | O(4)-C(13)-C(12)    | 125.95(10) |
| C(6)-C(5)-C(3)   | 112.30(10) | C(12)-C(13)-C(10)   | 108.40(10) |
| C(6)-C(5)-H(5A)  | 109.1      | O(5)-C(14)-C(12)    | 120.72(11) |
| C(6)-C(5)-H(5B)  | 109.1      | O(5)-C(14)-C(15)    | 120.16(10) |
| C(5)-C(6)-H(6A)  | 109.4      | C(12)-C(14)-C(15)   | 119.13(10) |
| C(5)-C(6)-H(6B)  | 109.4      | C(14)-C(15)-H(15A)  | 109.5      |
| H(6A)-C(6)-H(6B) | 108.0      | C(14)-C(15)-H(15B)  | 109.5      |
| C(7)-C(6)-C(5)   | 111.17(10) | C(14)-C(15)-H(15C)  | 109.5      |
| C(7)-C(6)-H(6A)  | 109.4      | H(15A)-C(15)-H(15B) | 109.5      |
| C(7)-C(6)-H(6B)  | 109.4      | H(15A)-C(15)-H(15C) | 109.5      |
| C(6)-C(7)-H(7A)  | 109.3      | H(15B)-C(15)-H(15C) | 109.5      |
| C(6)-C(7)-H(7B)  | 109.3      | C(17)-C(16)-N(2)    | 122.76(10) |
| H(7A)-C(7)-H(7B) | 108.0      | C(17)-C(16)-C(21)   | 120.52(11) |
| C(8)-C(7)-C(6)   | 111.59(11) | C(21)-C(16)-N(2)    | 116.62(10) |
| C(8)-C(7)-H(7A)  | 109.3      | C(16)-C(17)-H(17)   | 120.4      |
| C(8)-C(7)-H(7B)  | 109.3      | C(16)-C(17)-C(18)   | 119.25(11) |
| C(7)-C(8)-H(8A)  | 109.6      | C(18)-C(17)-H(17)   | 120.4      |
| C(7)-C(8)-H(8B)  | 109.6      | C(17)-C(18)-H(18)   | 119.7      |
| C(7)-C(8)-C(9)   | 110.28(10) | C(19)-C(18)-C(17)   | 120.60(12) |
| H(8A)-C(8)-H(8B) | 108.1      | C(19)-C(18)-H(18)   | 119.7      |
| C(9)-C(8)-H(8A)  | 109.6      | C(18)-C(19)-H(19)   | 120.1      |
| C(9)-C(8)-H(8B)  | 109.6      | C(18)-C(19)-C(20)   | 119.79(12) |
| C(3)-C(9)-H(9A)  | 109.5      | C(20)-C(19)-H(19)   | 120.1      |
| C(3)-C(9)-H(9B)  | 109.5      | C(19)-C(20)-H(20)   | 119.9      |
| C(8)-C(9)-C(3)   | 110.73(9)  | C(21)-C(20)-C(19)   | 120.22(12) |
| C(8)-C(9)-H(9A)  | 109.5      | C(21)-C(20)-H(20)   | 119.9      |
| C(8)-C(9)-H(9B)  | 109.5      | C(16)-C(21)-H(21)   | 120.2      |
| H(9A)-C(9)-H(9B) | 108.1      | C(20)-C(21)-C(16)   | 119.61(12) |
| O(2)-C(10)-C(13) | 107.00(9)  | C(20)-C(21)-H(21)   | 120.2      |

---

Symmetry transformations used to generate equivalent atoms:

**Table S11.** Anisotropic displacement parameters ( $\text{\AA}^2 \times 10^3$ ) for **8a**. The anisotropic displacement factor exponent takes the form:  $-2p^2[h^2 a^*2U^{11} + \dots + 2hka^*b^*U^{12}]$

---

|       | U <sup>11</sup> | U <sup>22</sup> | U <sup>33</sup> | U <sup>23</sup> | U <sup>13</sup> | U <sup>12</sup> |
|-------|-----------------|-----------------|-----------------|-----------------|-----------------|-----------------|
| O(1)  | 21(1)           | 24(1)           | 23(1)           | -1(1)           | 0(1)            | -5(1)           |
| O(2)  | 21(1)           | 21(1)           | 16(1)           | 1(1)            | -1(1)           | -5(1)           |
| O(3)  | 25(1)           | 24(1)           | 21(1)           | -1(1)           | 1(1)            | -8(1)           |
| O(4)  | 21(1)           | 26(1)           | 18(1)           | 4(1)            | -2(1)           | -5(1)           |
| O(5)  | 27(1)           | 32(1)           | 26(1)           | 5(1)            | -7(1)           | -10(1)          |
| N(1)  | 18(1)           | 20(1)           | 14(1)           | 2(1)            | -1(1)           | -2(1)           |
| N(2)  | 19(1)           | 19(1)           | 15(1)           | 3(1)            | 1(1)            | 0(1)            |
| C(1)  | 18(1)           | 21(1)           | 17(1)           | -2(1)           | -1(1)           | 1(1)            |
| C(2)  | 22(1)           | 29(1)           | 16(1)           | 1(1)            | -2(1)           | -4(1)           |
| C(3)  | 18(1)           | 21(1)           | 15(1)           | 1(1)            | -1(1)           | 0(1)            |
| C(4)  | 18(1)           | 16(1)           | 16(1)           | 0(1)            | 2(1)            | 2(1)            |
| C(5)  | 24(1)           | 23(1)           | 21(1)           | 4(1)            | 4(1)            | 4(1)            |
| C(6)  | 28(1)           | 32(1)           | 26(1)           | 12(1)           | 5(1)            | 8(1)            |
| C(7)  | 32(1)           | 34(1)           | 26(1)           | 13(1)           | 6(1)            | 4(1)            |
| C(8)  | 25(1)           | 34(1)           | 16(1)           | 3(1)            | 2(1)            | -1(1)           |
| C(9)  | 20(1)           | 25(1)           | 16(1)           | -1(1)           | 1(1)            | 1(1)            |
| C(10) | 19(1)           | 17(1)           | 16(1)           | 1(1)            | 2(1)            | 0(1)            |
| C(11) | 20(1)           | 20(1)           | 17(1)           | -4(1)           | -1(1)           | -1(1)           |
| C(12) | 19(1)           | 20(1)           | 17(1)           | -1(1)           | 1(1)            | -1(1)           |
| C(13) | 18(1)           | 19(1)           | 15(1)           | -1(1)           | 1(1)            | 1(1)            |
| C(14) | 20(1)           | 23(1)           | 19(1)           | -1(1)           | -1(1)           | -1(1)           |
| C(15) | 27(1)           | 39(1)           | 20(1)           | 6(1)            | -5(1)           | -9(1)           |
| C(16) | 17(1)           | 22(1)           | 16(1)           | -3(1)           | -1(1)           | -3(1)           |
| C(17) | 22(1)           | 23(1)           | 16(1)           | -1(1)           | -2(1)           | -1(1)           |

---

|       |       |       |       |       |       |       |
|-------|-------|-------|-------|-------|-------|-------|
| C(18) | 23(1) | 30(1) | 21(1) | -7(1) | -4(1) | 4(1)  |
| C(19) | 21(1) | 42(1) | 21(1) | -7(1) | 2(1)  | 0(1)  |
| C(20) | 26(1) | 37(1) | 21(1) | 2(1)  | 3(1)  | -5(1) |
| C(21) | 22(1) | 25(1) | 22(1) | 2(1)  | 1(1)  | -1(1) |

---

**Table S12.** Hydrogen coordinates ( $\times 10^4$ ) and isotropic displacement parameters ( $\text{\AA}^2 \times 10^3$ ) for **8a**.

|        | x        | y        | z        | U(eq) |
|--------|----------|----------|----------|-------|
| H(4)   | 6483(18) | 5519(17) | 2144(16) | 49(5) |
| H(2)   | 7584(15) | 6640(16) | 2937(13) | 33(4) |
| H(2B)  | 7887     | 5587     | 5971     | 27    |
| H(2C)  | 8890     | 4681     | 5845     | 27    |
| H(5A)  | 7257     | 2476     | 4639     | 27    |
| H(5B)  | 8488     | 3063     | 4614     | 27    |
| H(6A)  | 8532     | 1681     | 5920     | 35    |
| H(6B)  | 8920     | 2916     | 6338     | 35    |
| H(7A)  | 6686     | 1922     | 6398     | 37    |
| H(7B)  | 7621     | 2150     | 7345     | 37    |
| H(8A)  | 7402     | 4139     | 7126     | 30    |
| H(8B)  | 6170     | 3580     | 7221     | 30    |
| H(9A)  | 6008     | 4883     | 5862     | 25    |
| H(9B)  | 5691     | 3622     | 5468     | 25    |
| H(15A) | 4310     | 4291     | 206      | 45    |
| H(15B) | 3778     | 5315     | 778      | 45    |
| H(15C) | 2947     | 4499     | 66       | 45    |
| H(17)  | 9245     | 4213     | 3139     | 25    |
| H(18)  | 10783    | 3855     | 2229     | 30    |
| H(19)  | 11135    | 5067     | 945      | 34    |
| H(20)  | 9944     | 6647     | 552      | 33    |
| H(21)  | 8411     | 7019     | 1456     | 28    |

---

**Table S13.** Torsion angles [°] for **8a**.

|                        |             |                         |             |
|------------------------|-------------|-------------------------|-------------|
| O(1)-C(1)-C(2)-C(3)    | -170.04(12) | C(4)-N(1)-C(1)-C(2)     | -0.37(13)   |
| O(2)-C(10)-C(13)-O(4)  | -179.49(10) | C(4)-C(3)-C(5)-C(6)     | -179.79(10) |
| O(2)-C(10)-C(13)-C(12) | 1.69(12)    | C(4)-C(3)-C(9)-C(8)     | 177.39(10)  |
| O(2)-C(11)-C(12)-C(13) | -3.71(13)   | C(4)-C(10)-C(13)-O(4)   | 3.3(2)      |
| O(2)-C(11)-C(12)-C(14) | 178.29(10)  | C(4)-C(10)-C(13)-C(12)  | -175.50(13) |
| O(3)-C(11)-C(12)-C(13) | 174.22(13)  | C(5)-C(3)-C(4)-N(1)     | -102.12(10) |
| O(3)-C(11)-C(12)-C(14) | -3.8(2)     | C(5)-C(3)-C(4)-C(10)    | 73.91(14)   |
| N(1)-N(2)-C(16)-C(17)  | 22.07(15)   | C(5)-C(3)-C(9)-C(8)     | 56.12(13)   |
| N(1)-N(2)-C(16)-C(21)  | -161.52(10) | C(5)-C(6)-C(7)-C(8)     | -55.23(16)  |
| N(1)-C(1)-C(2)-C(3)    | 10.09(13)   | C(6)-C(7)-C(8)-C(9)     | 57.84(14)   |
| N(1)-C(4)-C(10)-O(2)   | 177.26(10)  | C(7)-C(8)-C(9)-C(3)     | -58.38(13)  |
| N(1)-C(4)-C(10)-C(13)  | -5.7(2)     | C(9)-C(3)-C(4)-N(1)     | 134.85(10)  |
| N(2)-N(1)-C(1)-O(1)    | -3.73(17)   | C(9)-C(3)-C(4)-C(10)    | -49.12(15)  |
| N(2)-N(1)-C(1)-C(2)    | 176.15(10)  | C(9)-C(3)-C(5)-C(6)     | -53.90(13)  |
| N(2)-N(1)-C(4)-C(3)    | 173.96(9)   | C(10)-O(2)-C(11)-O(3)   | -173.44(10) |
| N(2)-N(1)-C(4)-C(10)   | -1.96(18)   | C(10)-O(2)-C(11)-C(12)  | 4.83(12)    |
| N(2)-C(16)-C(17)-C(18) | 176.57(10)  | C(11)-O(2)-C(10)-C(4)   | 173.78(10)  |
| N(2)-C(16)-C(21)-C(20) | -176.65(11) | C(11)-O(2)-C(10)-C(13)  | -4.05(12)   |
| C(1)-N(1)-N(2)-C(16)   | 66.28(13)   | C(11)-C(12)-C(13)-O(4)  | -177.62(11) |
| C(1)-N(1)-C(4)-C(3)    | -9.64(13)   | C(11)-C(12)-C(13)-C(10) | 1.19(13)    |
| C(1)-N(1)-C(4)-C(10)   | 174.44(11)  | C(11)-C(12)-C(14)-O(5)  | -5.28(18)   |
| C(1)-C(2)-C(3)-C(4)    | -14.98(12)  | C(11)-C(12)-C(14)-C(15) | 175.07(11)  |
| C(1)-C(2)-C(3)-C(5)    | 99.23(11)   | C(13)-C(12)-C(14)-O(5)  | 177.20(12)  |
| C(1)-C(2)-C(3)-C(9)    | -138.15(10) | C(13)-C(12)-C(14)-C(15) | -2.4(2)     |
| C(2)-C(3)-C(4)-N(1)    | 14.89(12)   | C(14)-C(12)-C(13)-O(4)  | 0.2(2)      |
| C(2)-C(3)-C(4)-C(10)   | -169.08(11) | C(14)-C(12)-C(13)-C(10) | 179.01(12)  |
| C(2)-C(3)-C(5)-C(6)    | 68.70(13)   | C(16)-C(17)-C(18)-C(19) | -0.13(18)   |
| C(2)-C(3)-C(9)-C(8)    | -66.86(13)  | C(17)-C(16)-C(21)-C(20) | -0.16(17)   |
| C(3)-C(4)-C(10)-O(2)   | 2.03(17)    | C(17)-C(18)-C(19)-C(20) | -0.19(18)   |
| C(3)-C(4)-C(10)-C(13)  | 179.03(12)  | C(18)-C(19)-C(20)-C(21) | 0.33(19)    |
| C(3)-C(5)-C(6)-C(7)    | 53.32(15)   | C(19)-C(20)-C(21)-C(16) | -0.16(19)   |
| C(4)-N(1)-N(2)-C(16)   | -117.56(11) | C(21)-C(16)-C(17)-C(18) | 0.30(17)    |
| C(4)-N(1)-C(1)-O(1)    | 179.75(11)  |                         |             |

Symmetry transformations used to generate equivalent atoms:

**Table S14.** Hydrogen bonds for **8a** [Å and °].

| D-H...A            | d(D-H)    | d(H...A)  | d(D...A)   | <(DHA)    |
|--------------------|-----------|-----------|------------|-----------|
| O(4)-H(4)...N(1)   | 0.97(2)   | 2.52(2)   | 3.2909(12) | 136.4(16) |
| O(4)-H(4)...N(2)   | 0.97(2)   | 1.68(2)   | 2.6317(13) | 168.1(19) |
| N(2)-H(2)...O(3)#1 | 0.888(19) | 2.384(18) | 2.8794(13) | 115.5(14) |
| N(2)-H(2)...O(5)#1 | 0.888(19) | 2.009(19) | 2.8441(14) | 156.2(16) |

Symmetry transformations used to generate equivalent atoms:

#1 -x+1,y+1/2,-z+1/2

### 8.3 Compound 16b

X-ray diffraction data were collected at 100K on a four-circle Rigaku Synergy S diffractometer equipped with a HyPix6000HE area-detector (kappa geometry, shutterless  $\omega$ -scan technique), using monochromatized Cu  $K_{\alpha}$ -radiation. The intensity data were integrated and corrected for absorption and decay by the CrysAlisPro program.<sup>6</sup> The structure was solved by direct methods using SHELXT<sup>4</sup> and refined on  $F^2$  using SHELXL-2018<sup>5</sup> in the OLEX2 program.<sup>7</sup> All non-hydrogen atoms were refined with individual anisotropic displacement parameters. Locations of amino and hydroxy hydrogen atoms (H2, and H5) were found from the electron density-difference map; these hydrogen atoms were refined with individual isotropic displacement parameters. All other hydrogen atoms were placed in ideal calculated positions and refined as riding atoms with relative isotropic displacement parameters.

**Table S15.** Crystal data and structure refinement for **16b**.

---

|                                   |                                                                 |                          |
|-----------------------------------|-----------------------------------------------------------------|--------------------------|
| Identification code               | <b>16b</b>                                                      |                          |
| Empirical formula                 | C <sub>24</sub> H <sub>29</sub> N <sub>3</sub> O <sub>5</sub> S |                          |
| Formula weight                    | 471.56                                                          |                          |
| Temperature                       | 99.97(10) K                                                     |                          |
| Wavelength                        | 1.54184 Å                                                       |                          |
| Crystal system                    | Triclinic                                                       |                          |
| Space group                       | P $\bar{1}$                                                     |                          |
| Unit cell dimensions              | a = 10.03440(10) Å                                              | $\alpha$ = 70.4960(10)°. |
|                                   | b = 10.70520(10) Å                                              | $\beta$ = 89.3540(10)°.  |
|                                   | c = 11.26660(10) Å                                              | $\gamma$ = 79.0940(10)°. |
| Volume                            | 1118.45(2) Å <sup>3</sup>                                       |                          |
| Z                                 | 2                                                               |                          |
| Density (calculated)              | 1.400 g/cm <sup>3</sup>                                         |                          |
| Absorption coefficient            | 1.643 mm <sup>-1</sup>                                          |                          |
| F(000)                            | 500                                                             |                          |
| Crystal size                      | 0.2 x 0.12 x 0.06 mm <sup>3</sup>                               |                          |
| Theta range for data collection   | 4.169 to 77.920°.                                               |                          |
| Index ranges                      | -10 ≤ h ≤ 12, -13 ≤ k ≤ 13, -14 ≤ l ≤ 14                        |                          |
| Reflections collected             | 34127                                                           |                          |
| Independent reflections           | 4730 [R(int) = 0.0412]                                          |                          |
| Observed reflections              | 4689                                                            |                          |
| Completeness to theta = 67.684°   | 100.0 %                                                         |                          |
| Absorption correction             | Semi-empirical from equivalents                                 |                          |
| Max. and min. transmission        | 1.00000 and 0.74689                                             |                          |
| Refinement method                 | Full-matrix least-squares on F <sup>2</sup>                     |                          |
| Data / restraints / parameters    | 4730 / 3 / 318                                                  |                          |
| Goodness-of-fit on F <sup>2</sup> | 1.048                                                           |                          |
| Final R indices [I > 2σ(I)]       | R1 = 0.0333, wR2 = 0.0897                                       |                          |
| R indices (all data)              | R1 = 0.0335, wR2 = 0.0899                                       |                          |
| Extinction coefficient            | 0.0016(3)                                                       |                          |
| Largest diff. peak and hole       | 0.500 and -0.289 e. Å <sup>-3</sup>                             |                          |
| CCDC                              | 2270302                                                         |                          |

---



**Table S16.** Atomic coordinates ( $\times 10^4$ ) and equivalent isotropic displacement parameters ( $\text{\AA}^2 \times 10^3$ ) for **16b**.  $U(\text{eq})$  is defined as one third of the trace of the orthogonalized  $U^{\text{ij}}$  tensor.

|       | x        | y         | z        | U(eq) |
|-------|----------|-----------|----------|-------|
| S(1)  | 5056(1)  | 7940(1)   | 1878(1)  | 16(1) |
| O(1A) | 8484(15) | 11211(16) | 1130(12) | 16(2) |
| O(1B) | 8335(17) | 11411(17) | 1114(14) | 16(2) |
| O(2)  | 2248(1)  | 4836(1)   | 4582(1)  | 16(1) |
| O(3)  | 435(1)   | 2171(1)   | 4665(1)  | 14(1) |
| O(4)  | 1420(1)  | 4130(1)   | 6969(1)  | 18(1) |
| N(1)  | 4907(1)  | 8269(1)   | 4090(1)  | 16(1) |
| N(2)  | 3682(1)  | 6690(1)   | 3846(1)  | 17(1) |
| N(3)  | 3203(1)  | 6239(1)   | 2950(1)  | 15(1) |
| C(1)  | 4490(1)  | 7619(1)   | 3423(1)  | 15(1) |
| C(2)  | 5768(1)  | 9089(1)   | 3385(1)  | 15(1) |
| C(3)  | 5982(1)  | 9042(1)   | 2168(1)  | 15(1) |
| C(4)  | 6826(1)  | 9786(1)   | 1351(1)  | 16(1) |
| C(5)  | 7488(1)  | 10585(1)  | 1796(1)  | 16(1) |
| C(6)  | 7265(1)  | 10681(1)  | 2993(1)  | 16(1) |
| C(7)  | 6407(1)  | 9948(1)   | 3786(1)  | 16(1) |
| C(8A) | 8616(14) | 11275(13) | -138(11) | 29(1) |
| C(8B) | 8336(15) | 11600(14) | -188(12) | 29(1) |
| C(9)  | 2488(1)  | 5331(1)   | 3324(1)  | 14(1) |
| C(10) | 1796(1)  | 4893(1)   | 2405(1)  | 14(1) |
| C(11) | 1626(1)  | 3402(1)   | 2906(1)  | 13(1) |
| C(12) | 546(1)   | 3210(1)   | 2052(1)  | 16(1) |
| C(13) | 1058(1)  | 3332(1)   | 741(1)   | 19(1) |
| C(14) | 2376(1)  | 2319(1)   | 816(1)   | 23(1) |
| C(15) | 3471(1)  | 2496(1)   | 1646(1)  | 21(1) |
| C(16) | 2972(1)  | 2396(1)   | 2958(1)  | 17(1) |
| C(17) | 1177(1)  | 3157(1)   | 4231(1)  | 13(1) |
| C(18) | 1502(1)  | 3826(1)   | 4978(1)  | 14(1) |
| C(19) | 1119(1)  | 3521(1)   | 6275(1)  | 14(1) |
| C(20) | 331(1)   | 2472(1)   | 6654(1)  | 16(1) |
| C(21) | 5(1)     | 1858(1)   | 5862(1)  | 15(1) |
| C(22) | -842(1)  | 804(1)    | 6147(1)  | 19(1) |
| O(5)  | 2621(1)  | 6405(1)   | 6253(1)  | 18(1) |

|       |         |         |         |       |
|-------|---------|---------|---------|-------|
| C(23) | 3812(1) | 5979(1) | 7079(1) | 22(1) |
| C(24) | 3484(2) | 5547(1) | 8451(1) | 29(1) |

---

**Table S17.** Bond lengths [Å] and angles [°] for **16b**.

---

|             |            |              |            |
|-------------|------------|--------------|------------|
| S(1)-C(1)   | 1.7665(11) | C(8B)-H(8D)  | 0.9800     |
| S(1)-C(3)   | 1.7435(11) | C(8B)-H(8E)  | 0.9800     |
| O(1A)-C(5)  | 1.383(9)   | C(8B)-H(8F)  | 0.9800     |
| O(1A)-C(8A) | 1.413(9)   | C(9)-C(10)   | 1.4955(15) |
| O(1B)-C(5)  | 1.382(10)  | C(10)-H(10A) | 0.9900     |
| O(1B)-C(8B) | 1.413(11)  | C(10)-H(10B) | 0.9900     |
| O(2)-C(9)   | 1.3732(13) | C(10)-C(11)  | 1.5480(14) |
| O(2)-C(18)  | 1.3801(13) | C(11)-C(12)  | 1.5424(15) |
| O(3)-C(17)  | 1.3614(13) | C(11)-C(16)  | 1.5486(15) |
| O(3)-C(21)  | 1.3622(13) | C(11)-C(17)  | 1.5069(15) |
| O(4)-C(19)  | 1.2438(14) | C(12)-H(12A) | 0.9900     |
| N(1)-C(1)   | 1.3010(15) | C(12)-H(12B) | 0.9900     |
| N(1)-C(2)   | 1.3974(14) | C(12)-C(13)  | 1.5306(15) |
| N(2)-H(1)   | 0.896(19)  | C(13)-H(13A) | 0.9900     |
| N(2)-N(3)   | 1.3808(13) | C(13)-H(13B) | 0.9900     |
| N(2)-C(1)   | 1.3605(15) | C(13)-C(14)  | 1.5268(18) |
| N(3)-C(9)   | 1.2737(15) | C(14)-H(14A) | 0.9900     |
| C(2)-C(3)   | 1.4016(16) | C(14)-H(14B) | 0.9900     |
| C(2)-C(7)   | 1.4033(16) | C(14)-C(15)  | 1.5275(18) |
| C(3)-C(4)   | 1.3955(16) | C(15)-H(15A) | 0.9900     |
| C(4)-H(4)   | 0.9500     | C(15)-H(15B) | 0.9900     |
| C(4)-C(5)   | 1.3903(16) | C(15)-C(16)  | 1.5313(16) |
| C(5)-C(6)   | 1.3994(16) | C(16)-H(16A) | 0.9900     |
| C(6)-H(6)   | 0.9500     | C(16)-H(16B) | 0.9900     |
| C(6)-C(7)   | 1.3870(16) | C(17)-C(18)  | 1.3504(16) |
| C(7)-H(7)   | 0.9500     | C(18)-C(19)  | 1.4513(15) |
| C(8A)-H(8K) | 0.9800     | C(19)-C(20)  | 1.4402(15) |
| C(8A)-H(8L) | 0.9800     | C(20)-H(20)  | 0.9500     |
| C(8A)-H(8M) | 0.9800     | C(20)-C(21)  | 1.3473(16) |

|                  |            |                     |            |
|------------------|------------|---------------------|------------|
| C(21)-C(22)      | 1.4876(15) | C(4)-C(5)-C(6)      | 121.03(11) |
| C(22)-H(22A)     | 0.9800     | C(5)-C(6)-H(6)      | 119.6      |
| C(22)-H(22B)     | 0.9800     | C(7)-C(6)-C(5)      | 120.88(10) |
| C(22)-H(22C)     | 0.9800     | C(7)-C(6)-H(6)      | 119.6      |
| O(5)-H(2)        | 0.85(2)    | C(2)-C(7)-H(7)      | 120.3      |
| O(5)-C(23)       | 1.4281(15) | C(6)-C(7)-C(2)      | 119.46(10) |
| C(23)-H(23A)     | 0.9900     | C(6)-C(7)-H(7)      | 120.3      |
| C(23)-H(23B)     | 0.9900     | O(1A)-C(8A)-H(8K)   | 109.5      |
| C(23)-C(24)      | 1.5105(18) | O(1A)-C(8A)-H(8L)   | 109.5      |
| C(24)-H(24A)     | 0.9800     | O(1A)-C(8A)-H(8M)   | 109.5      |
| C(24)-H(24B)     | 0.9800     | H(8K)-C(8A)-H(8L)   | 109.5      |
| C(24)-H(24C)     | 0.9800     | H(8K)-C(8A)-H(8M)   | 109.5      |
| C(3)-S(1)-C(1)   | 87.94(5)   | H(8L)-C(8A)-H(8M)   | 109.5      |
| C(5)-O(1A)-C(8A) | 118.2(11)  | O(1B)-C(8B)-H(8D)   | 109.5      |
| C(5)-O(1B)-C(8B) | 115.5(13)  | O(1B)-C(8B)-H(8E)   | 109.5      |
| C(9)-O(2)-C(18)  | 118.57(9)  | O(1B)-C(8B)-H(8F)   | 109.5      |
| C(17)-O(3)-C(21) | 119.86(9)  | H(8D)-C(8B)-H(8E)   | 109.5      |
| C(1)-N(1)-C(2)   | 109.20(10) | H(8D)-C(8B)-H(8F)   | 109.5      |
| N(3)-N(2)-H(1)   | 122.8(12)  | H(8E)-C(8B)-H(8F)   | 109.5      |
| C(1)-N(2)-H(1)   | 119.5(12)  | O(2)-C(9)-C(10)     | 119.41(9)  |
| C(1)-N(2)-N(3)   | 115.80(9)  | N(3)-C(9)-O(2)      | 119.22(10) |
| C(9)-N(3)-N(2)   | 117.41(10) | N(3)-C(9)-C(10)     | 121.11(10) |
| N(1)-C(1)-S(1)   | 117.20(9)  | C(9)-C(10)-H(10A)   | 108.6      |
| N(1)-C(1)-N(2)   | 124.46(10) | C(9)-C(10)-H(10B)   | 108.6      |
| N(2)-C(1)-S(1)   | 118.32(8)  | C(9)-C(10)-C(11)    | 114.73(9)  |
| N(1)-C(2)-C(3)   | 115.86(10) | H(10A)-C(10)-H(10B) | 107.6      |
| N(1)-C(2)-C(7)   | 125.79(10) | C(11)-C(10)-H(10A)  | 108.6      |
| C(3)-C(2)-C(7)   | 118.35(10) | C(11)-C(10)-H(10B)  | 108.6      |
| C(2)-C(3)-S(1)   | 109.79(8)  | C(10)-C(11)-C(16)   | 112.63(9)  |
| C(4)-C(3)-S(1)   | 127.24(9)  | C(12)-C(11)-C(10)   | 108.90(9)  |
| C(4)-C(3)-C(2)   | 122.97(10) | C(12)-C(11)-C(16)   | 109.69(9)  |
| C(3)-C(4)-H(4)   | 121.4      | C(17)-C(11)-C(10)   | 105.70(9)  |
| C(5)-C(4)-C(3)   | 117.24(10) | C(17)-C(11)-C(12)   | 111.58(9)  |
| C(5)-C(4)-H(4)   | 121.4      | C(17)-C(11)-C(16)   | 108.32(9)  |
| O(1A)-C(5)-C(4)  | 121.6(7)   | C(11)-C(12)-H(12A)  | 109.3      |
| O(1A)-C(5)-C(6)  | 117.1(7)   | C(11)-C(12)-H(12B)  | 109.3      |
| O(1B)-C(5)-C(4)  | 125.4(7)   | H(12A)-C(12)-H(12B) | 108.0      |
| O(1B)-C(5)-C(6)  | 113.5(7)   | C(13)-C(12)-C(11)   | 111.39(9)  |

|                     |            |                     |            |
|---------------------|------------|---------------------|------------|
| C(13)-C(12)-H(12A)  | 109.3      | C(17)-C(18)-O(2)    | 122.92(10) |
| C(13)-C(12)-H(12B)  | 109.3      | C(17)-C(18)-C(19)   | 122.64(10) |
| C(12)-C(13)-H(13A)  | 109.3      | O(4)-C(19)-C(18)    | 122.95(10) |
| C(12)-C(13)-H(13B)  | 109.3      | O(4)-C(19)-C(20)    | 124.07(10) |
| H(13A)-C(13)-H(13B) | 108.0      | C(20)-C(19)-C(18)   | 112.96(10) |
| C(14)-C(13)-C(12)   | 111.54(10) | C(19)-C(20)-H(20)   | 119.0      |
| C(14)-C(13)-H(13A)  | 109.3      | C(21)-C(20)-C(19)   | 122.09(10) |
| C(14)-C(13)-H(13B)  | 109.3      | C(21)-C(20)-H(20)   | 119.0      |
| C(13)-C(14)-H(14A)  | 109.5      | O(3)-C(21)-C(22)    | 112.18(10) |
| C(13)-C(14)-H(14B)  | 109.5      | C(20)-C(21)-O(3)    | 121.69(10) |
| C(13)-C(14)-C(15)   | 110.87(10) | C(20)-C(21)-C(22)   | 126.12(10) |
| H(14A)-C(14)-H(14B) | 108.1      | C(21)-C(22)-H(22A)  | 109.5      |
| C(15)-C(14)-H(14A)  | 109.5      | C(21)-C(22)-H(22B)  | 109.5      |
| C(15)-C(14)-H(14B)  | 109.5      | C(21)-C(22)-H(22C)  | 109.5      |
| C(14)-C(15)-H(15A)  | 109.4      | H(22A)-C(22)-H(22B) | 109.5      |
| C(14)-C(15)-H(15B)  | 109.4      | H(22A)-C(22)-H(22C) | 109.5      |
| C(14)-C(15)-C(16)   | 111.17(10) | H(22B)-C(22)-H(22C) | 109.5      |
| H(15A)-C(15)-H(15B) | 108.0      | C(23)-O(5)-H(2)     | 108.2(13)  |
| C(16)-C(15)-H(15A)  | 109.4      | O(5)-C(23)-H(23A)   | 109.1      |
| C(16)-C(15)-H(15B)  | 109.4      | O(5)-C(23)-H(23B)   | 109.1      |
| C(11)-C(16)-H(16A)  | 109.1      | O(5)-C(23)-C(24)    | 112.29(10) |
| C(11)-C(16)-H(16B)  | 109.1      | H(23A)-C(23)-H(23B) | 107.9      |
| C(15)-C(16)-C(11)   | 112.59(9)  | C(24)-C(23)-H(23A)  | 109.1      |
| C(15)-C(16)-H(16A)  | 109.1      | C(24)-C(23)-H(23B)  | 109.1      |
| C(15)-C(16)-H(16B)  | 109.1      | C(23)-C(24)-H(24A)  | 109.5      |
| H(16A)-C(16)-H(16B) | 107.8      | C(23)-C(24)-H(24B)  | 109.5      |
| O(3)-C(17)-C(11)    | 115.55(9)  | C(23)-C(24)-H(24C)  | 109.5      |
| C(18)-C(17)-O(3)    | 120.70(10) | H(24A)-C(24)-H(24B) | 109.5      |
| C(18)-C(17)-C(11)   | 123.73(10) | H(24A)-C(24)-H(24C) | 109.5      |
| O(2)-C(18)-C(19)    | 114.43(9)  | H(24B)-C(24)-H(24C) | 109.5      |

---

**Table S18.** Anisotropic displacement parameters ( $\text{\AA}^2 \times 10^3$ ) for **16b**. The anisotropic displacement factor exponent takes the form:  $-2 \square^2 [h^2 a^* 2U^{11} + \dots + 2 h k a^* b^* U^{12}]$

|       | U <sup>11</sup> | U <sup>22</sup> | U <sup>33</sup> | U <sup>23</sup> | U <sup>13</sup> | U <sup>12</sup> |
|-------|-----------------|-----------------|-----------------|-----------------|-----------------|-----------------|
| S(1)  | 21(1)           | 17(1)           | 14(1)           | -7(1)           | 4(1)            | -11(1)          |
| O(1A) | 21(3)           | 15(4)           | 16(1)           | -6(2)           | 4(1)            | -9(3)           |
| O(1B) | 21(3)           | 15(4)           | 16(1)           | -6(2)           | 4(1)            | -9(3)           |
| O(2)  | 22(1)           | 16(1)           | 12(1)           | -5(1)           | 3(1)            | -10(1)          |
| O(3)  | 19(1)           | 13(1)           | 13(1)           | -4(1)           | 4(1)            | -7(1)           |
| O(4)  | 23(1)           | 20(1)           | 15(1)           | -8(1)           | 3(1)            | -9(1)           |
| N(1)  | 20(1)           | 16(1)           | 14(1)           | -6(1)           | 3(1)            | -7(1)           |
| N(2)  | 23(1)           | 19(1)           | 14(1)           | -8(1)           | 5(1)            | -11(1)          |
| N(3)  | 18(1)           | 14(1)           | 15(1)           | -6(1)           | 2(1)            | -6(1)           |
| C(1)  | 17(1)           | 14(1)           | 14(1)           | -4(1)           | 2(1)            | -5(1)           |
| C(2)  | 17(1)           | 12(1)           | 14(1)           | -3(1)           | 1(1)            | -4(1)           |
| C(3)  | 17(1)           | 12(1)           | 15(1)           | -5(1)           | 0(1)            | -4(1)           |
| C(4)  | 20(1)           | 16(1)           | 13(1)           | -5(1)           | 2(1)            | -6(1)           |
| C(5)  | 18(1)           | 14(1)           | 16(1)           | -3(1)           | 1(1)            | -6(1)           |
| C(6)  | 20(1)           | 14(1)           | 17(1)           | -6(1)           | -1(1)           | -6(1)           |
| C(7)  | 20(1)           | 15(1)           | 13(1)           | -5(1)           | 0(1)            | -5(1)           |
| C(8A) | 39(4)           | 38(4)           | 18(1)           | -9(2)           | 8(2)            | -27(3)          |
| C(8B) | 39(4)           | 38(4)           | 18(1)           | -9(2)           | 8(2)            | -27(3)          |
| C(9)  | 16(1)           | 13(1)           | 12(1)           | -4(1)           | 3(1)            | -4(1)           |
| C(10) | 18(1)           | 13(1)           | 12(1)           | -4(1)           | 2(1)            | -6(1)           |
| C(11) | 17(1)           | 12(1)           | 12(1)           | -4(1)           | 2(1)            | -6(1)           |
| C(12) | 18(1)           | 18(1)           | 14(1)           | -5(1)           | 1(1)            | -9(1)           |
| C(13) | 26(1)           | 21(1)           | 13(1)           | -6(1)           | 1(1)            | -11(1)          |
| C(14) | 36(1)           | 18(1)           | 18(1)           | -9(1)           | 8(1)            | -9(1)           |
| C(15) | 23(1)           | 18(1)           | 18(1)           | -5(1)           | 6(1)            | 0(1)            |
| C(16) | 18(1)           | 15(1)           | 16(1)           | -4(1)           | 2(1)            | -3(1)           |
| C(17) | 14(1)           | 11(1)           | 14(1)           | -2(1)           | 1(1)            | -5(1)           |
| C(18) | 15(1)           | 12(1)           | 13(1)           | -2(1)           | 2(1)            | -6(1)           |
| C(19) | 16(1)           | 14(1)           | 14(1)           | -4(1)           | 1(1)            | -2(1)           |
| C(20) | 19(1)           | 14(1)           | 12(1)           | -3(1)           | 4(1)            | -5(1)           |
| C(21) | 18(1)           | 13(1)           | 13(1)           | -2(1)           | 4(1)            | -3(1)           |
| C(22) | 26(1)           | 17(1)           | 17(1)           | -6(1)           | 6(1)            | -10(1)          |

|       |       |       |       |       |       |        |
|-------|-------|-------|-------|-------|-------|--------|
| O(5)  | 22(1) | 19(1) | 16(1) | -6(1) | 2(1)  | -9(1)  |
| C(23) | 17(1) | 20(1) | 27(1) | -4(1) | 0(1)  | -5(1)  |
| C(24) | 35(1) | 28(1) | 21(1) | -1(1) | -7(1) | -12(1) |

**Table S19.** Hydrogen coordinates ( $\times 10^4$ ) and isotropic displacement parameters ( $\text{\AA}^2 \times 10^3$ ) for **16b**.

|        | x        | y        | z        | U(eq) |
|--------|----------|----------|----------|-------|
| H(1)   | 3326(19) | 6567(19) | 4599(18) | 35(5) |
| H(4)   | 6943     | 9748     | 525      | 19    |
| H(6)   | 7707     | 11255    | 3267     | 20    |
| H(7)   | 6253     | 10028    | 4594     | 19    |
| H(8K)  | 7728     | 11649    | -599     | 44    |
| H(8L)  | 8950     | 10365    | -166     | 44    |
| H(8M)  | 9260     | 11856    | -528     | 44    |
| H(8D)  | 7435     | 12075    | -587     | 44    |
| H(8E)  | 8559     | 10718    | -305     | 44    |
| H(8F)  | 9016     | 12137    | -576     | 44    |
| H(10A) | 2324     | 5033     | 1640     | 17    |
| H(10B) | 886      | 5481     | 2152     | 17    |
| H(12A) | 313      | 2309     | 2448     | 20    |
| H(12B) | -290     | 3901     | 1970     | 20    |
| H(13A) | 355      | 3173     | 229      | 23    |
| H(13B) | 1214     | 4260     | 317      | 23    |
| H(14A) | 2701     | 2452     | -42      | 27    |
| H(14B) | 2203     | 1389     | 1168     | 27    |
| H(15A) | 3720     | 3388     | 1240     | 25    |
| H(15B) | 4293     | 1790     | 1728     | 25    |
| H(16A) | 3679     | 2577     | 3449     | 20    |
| H(16B) | 2837     | 1464     | 3401     | 20    |
| H(20)  | 32       | 2206     | 7488     | 19    |
| H(22A) | -1633    | 1120     | 5546     | 29    |
| H(22B) | -1150    | 629      | 7006     | 29    |
| H(22C) | -302     | -30      | 6078     | 29    |

|        |          |          |          |       |
|--------|----------|----------|----------|-------|
| H(2)   | 2200(20) | 5750(20) | 6422(18) | 39(5) |
| H(23A) | 4310     | 6731     | 6898     | 27    |
| H(23B) | 4414     | 5215     | 6915     | 27    |
| H(24A) | 2918     | 6311     | 8627     | 43    |
| H(24B) | 4329     | 5247     | 8982     | 43    |
| H(24C) | 2992     | 4801     | 8636     | 43    |

**Table S20.** Torsion angles [°] for **16b**.

|                        |             |                         |             |
|------------------------|-------------|-------------------------|-------------|
| S(1)-C(3)-C(4)-C(5)    | -178.77(9)  | C(3)-S(1)-C(1)-N(1)     | 1.28(10)    |
| O(1A)-C(5)-C(6)-C(7)   | -172.1(8)   | C(3)-S(1)-C(1)-N(2)     | -177.07(10) |
| O(1B)-C(5)-C(6)-C(7)   | 178.1(9)    | C(3)-C(2)-C(7)-C(6)     | -2.44(16)   |
| O(2)-C(9)-C(10)-C(11)  | -36.40(14)  | C(3)-C(4)-C(5)-O(1A)    | 171.0(8)    |
| O(2)-C(18)-C(19)-O(4)  | 0.94(16)    | C(3)-C(4)-C(5)-O(1B)    | -178.4(10)  |
| O(2)-C(18)-C(19)-C(20) | 179.43(9)   | C(3)-C(4)-C(5)-C(6)     | -2.76(17)   |
| O(3)-C(17)-C(18)-O(2)  | -179.78(9)  | C(4)-C(5)-C(6)-C(7)     | 1.93(18)    |
| O(3)-C(17)-C(18)-C(19) | 1.51(17)    | C(5)-C(6)-C(7)-C(2)     | 0.77(17)    |
| O(4)-C(19)-C(20)-C(21) | 178.62(11)  | C(7)-C(2)-C(3)-S(1)     | -178.61(8)  |
| N(1)-C(2)-C(3)-S(1)    | 0.62(13)    | C(7)-C(2)-C(3)-C(4)     | 1.57(17)    |
| N(1)-C(2)-C(3)-C(4)    | -179.20(10) | C(8A)-O(1A)-C(5)-C(4)   | 13.8(16)    |
| N(1)-C(2)-C(7)-C(6)    | 178.41(10)  | C(8A)-O(1A)-C(5)-C(6)   | -172.3(9)   |
| N(2)-N(3)-C(9)-O(2)    | -0.99(15)   | C(8B)-O(1B)-C(5)-C(4)   | 10.5(18)    |
| N(2)-N(3)-C(9)-C(10)   | 173.04(10)  | C(8B)-O(1B)-C(5)-C(6)   | -165.5(10)  |
| N(3)-N(2)-C(1)-S(1)    | -9.94(14)   | C(9)-O(2)-C(18)-C(17)   | 10.57(16)   |
| N(3)-N(2)-C(1)-N(1)    | 171.84(10)  | C(9)-O(2)-C(18)-C(19)   | -170.63(9)  |
| N(3)-C(9)-C(10)-C(11)  | 149.59(10)  | C(9)-C(10)-C(11)-C(12)  | 162.95(9)   |
| C(1)-S(1)-C(3)-C(2)    | -0.97(8)    | C(9)-C(10)-C(11)-C(16)  | -75.14(12)  |
| C(1)-S(1)-C(3)-C(4)    | 178.84(11)  | C(9)-C(10)-C(11)-C(17)  | 42.95(12)   |
| C(1)-N(1)-C(2)-C(3)    | 0.30(14)    | C(10)-C(11)-C(12)-C(13) | 68.90(12)   |
| C(1)-N(1)-C(2)-C(7)    | 179.46(11)  | C(10)-C(11)-C(16)-C(15) | -67.26(12)  |
| C(1)-N(2)-N(3)-C(9)    | 177.32(10)  | C(10)-C(11)-C(17)-O(3)  | 153.43(9)   |
| C(2)-N(1)-C(1)-S(1)    | -1.12(13)   | C(10)-C(11)-C(17)-C(18) | -28.36(14)  |
| C(2)-N(1)-C(1)-N(2)    | 177.11(10)  | C(11)-C(12)-C(13)-C(14) | 57.05(12)   |
| C(2)-C(3)-C(4)-C(5)    | 1.02(17)    | C(11)-C(17)-C(18)-O(2)  | 2.09(17)    |

|                         |             |                         |             |
|-------------------------|-------------|-------------------------|-------------|
| C(11)-C(17)-C(18)-C(19) | -176.61(10) | C(17)-C(11)-C(12)-C(13) | -174.80(9)  |
| C(12)-C(11)-C(16)-C(15) | 54.20(12)   | C(17)-C(11)-C(16)-C(15) | 176.20(9)   |
| C(12)-C(11)-C(17)-O(3)  | 35.20(13)   | C(17)-C(18)-C(19)-O(4)  | 179.75(11)  |
| C(12)-C(11)-C(17)-C(18) | -146.59(11) | C(17)-C(18)-C(19)-C(20) | -1.77(15)   |
| C(12)-C(13)-C(14)-C(15) | -56.67(13)  | C(18)-O(2)-C(9)-N(3)    | -178.28(10) |
| C(13)-C(14)-C(15)-C(16) | 55.21(13)   | C(18)-O(2)-C(9)-C(10)   | 7.59(14)    |
| C(14)-C(15)-C(16)-C(11) | -54.92(13)  | C(18)-C(19)-C(20)-C(21) | 0.16(16)    |
| C(16)-C(11)-C(12)-C(13) | -54.77(12)  | C(19)-C(20)-C(21)-O(3)  | 1.74(17)    |
| C(16)-C(11)-C(17)-O(3)  | -85.64(11)  | C(19)-C(20)-C(21)-C(22) | -177.64(11) |
| C(16)-C(11)-C(17)-C(18) | 92.58(13)   | C(21)-O(3)-C(17)-C(11)  | 178.74(9)   |
| C(17)-O(3)-C(21)-C(20)  | -2.10(16)   | C(21)-O(3)-C(17)-C(18)  | 0.47(15)    |
| C(17)-O(3)-C(21)-C(22)  | 177.36(9)   |                         |             |

**Table S21.** Hydrogen bonds for **16b** [ $\text{\AA}$  and  $^\circ$ ].

| D-H...A          | d(D-H)    | d(H...A) | d(D...A)   | $\angle$ (DHA) |
|------------------|-----------|----------|------------|----------------|
| N(2)-H(1)...O(5) | 0.896(19) | 1.95(2)  | 2.8441(13) | 175.6(18)      |
| O(5)-H(2)...O(4) | 0.85(2)   | 1.95(2)  | 2.7956(12) | 172.8(19)      |



## 8.4 Compound 17

X-ray diffraction data were collected at 100K on a four-circle Rigaku Synergy S diffractometer equipped with a HyPix6000HE area-detector (kappa geometry, shutterless  $\omega$ -scan technique), using graphite monochromatized Cu K $_{\alpha}$ -radiation. The intensity data were integrated and corrected for absorption and decay by the CrysAlisPro program.<sup>6</sup> The structure was solved by direct methods using SHELXT<sup>4</sup> and refined on  $F^2$  using SHELXL-2018<sup>5</sup> in the OLEX2 program.<sup>7</sup> All non-hydrogen atoms were refined with individual anisotropic displacement parameters. The locations of hydrogen atoms H1, H20A and H20B were found from the electron density-difference map; these hydrogen atoms were refined with individual isotropic displacement parameters. All other hydrogen atoms were placed in ideal calculated positions and refined as riding atoms with relative isotropic displacement parameters. The Mercury program suite<sup>8</sup> was used for molecular graphics.

**Table S22.** Crystal data and structure refinement for **17**.

|                                 |                                          |                   |
|---------------------------------|------------------------------------------|-------------------|
| Identification code             | <b>17</b>                                |                   |
| Empirical formula               | C22 H22 N4 O5                            |                   |
| Formula weight                  | 422.43                                   |                   |
| Temperature                     | 100.0(2) K                               |                   |
| Wavelength                      | 1.54184 Å                                |                   |
| Crystal system                  | Triclinic                                |                   |
| Space group                     | P-1                                      |                   |
| Unit cell dimensions            | a = 8.26940(12) Å                        | a = 66.2311(15)°. |
|                                 | b = 11.01204(19) Å                       | b = 74.6710(13)°. |
|                                 | c = 12.41759(17) Å                       | g = 76.7962(14)°. |
| Volume                          | 988.49(3) Å <sup>3</sup>                 |                   |
| Z                               | 2                                        |                   |
| Density (calculated)            | 1.419 g/cm <sup>3</sup>                  |                   |
| Absorption coefficient          | 0.851 mm <sup>-1</sup>                   |                   |
| F(000)                          | 444                                      |                   |
| Crystal size                    | 0.22 x 0.11 x 0.02 mm <sup>3</sup>       |                   |
| Theta range for data collection | 3.965 to 77.859°.                        |                   |
| Index ranges                    | -10 ≤ h ≤ 10, -13 ≤ k ≤ 13, -15 ≤ l ≤ 15 |                   |
| Reflections collected           | 47219                                    |                   |
| Independent reflections         | 4157 [R(int) = 0.0306]                   |                   |

|                                   |                                             |
|-----------------------------------|---------------------------------------------|
| Observed reflections              | 3886                                        |
| Completeness to theta = 67.684°   | 99.8 %                                      |
| Absorption correction             | Gaussian                                    |
| Max. and min. transmission        | 1.000 and 0.499                             |
| Refinement method                 | Full-matrix least-squares on F <sup>2</sup> |
| Data / restraints / parameters    | 4157 / 0 / 293                              |
| Goodness-of-fit on F <sup>2</sup> | 1.035                                       |
| Final R indices [I>2sigma(I)]     | R1 = 0.0354, wR2 = 0.0922                   |
| R indices (all data)              | R1 = 0.0373, wR2 = 0.0935                   |
| Largest diff. peak and hole       | 0.267 and -0.244 e.Å <sup>-3</sup>          |
| CCDC                              | 2270301                                     |

**Table S23.** Atomic coordinates ( $\times 10^4$ ) and equivalent isotropic displacement parameters ( $\text{\AA}^2 \times 10^3$ ) for **17**.  $U(\text{eq})$  is defined as one third of the trace of the orthogonalized  $U^{\text{ij}}$  tensor.

|       | x        | y       | z       | U(eq) |
|-------|----------|---------|---------|-------|
| O(5)  | 2834(1)  | 4578(1) | 3800(1) | 28(1) |
| O(14) | 7595(1)  | 5767(1) | 1601(1) | 23(1) |
| O(16) | 10314(1) | 6911(1) | -4(1)   | 30(1) |
| O(19) | 11115(1) | 3160(1) | 2471(1) | 23(1) |
| N(1)  | 2062(1)  | 8880(1) | 1186(1) | 24(1) |
| N(3)  | 4722(1)  | 7344(1) | 1536(1) | 24(1) |
| N(4)  | 4790(1)  | 6006(1) | 2389(1) | 23(1) |
| N(6)  | 2140(1)  | 6781(1) | 2511(1) | 21(1) |
| C(2)  | 3095(1)  | 7736(1) | 1670(1) | 22(1) |
| C(5)  | 3212(1)  | 5632(1) | 3014(1) | 22(1) |
| C(7)  | 418(1)   | 7331(1) | 2625(1) | 22(1) |
| C(8)  | -1022(2) | 6821(1) | 3368(1) | 26(1) |
| C(9)  | -2541(2) | 7677(1) | 3223(1) | 30(1) |
| C(10) | -2581(2) | 8981(1) | 2376(1) | 29(1) |
| C(11) | -1114(2) | 9502(1) | 1651(1) | 27(1) |
| C(12) | 402(2)   | 8651(1) | 1783(1) | 23(1) |

|       |          |         |         |       |
|-------|----------|---------|---------|-------|
| C(13) | 6352(1)  | 5185(1) | 2528(1) | 21(1) |
| C(15) | 9204(1)  | 5073(1) | 1650(1) | 21(1) |
| C(16) | 10553(2) | 5761(1) | 745(1)  | 24(1) |
| C(17) | 12196(2) | 4968(1) | 808(1)  | 27(1) |
| C(18) | 12428(2) | 3728(1) | 1638(1) | 26(1) |
| C(20) | 9517(1)  | 3838(1) | 2476(1) | 21(1) |
| C(21) | 8216(1)  | 3072(1) | 3459(1) | 20(1) |
| C(22) | 6564(1)  | 4011(1) | 3413(1) | 24(1) |
| C(23) | 8062(2)  | 1813(1) | 3242(1) | 23(1) |
| C(24) | 6815(2)  | 957(1)  | 4258(1) | 26(1) |
| C(25) | 7348(2)  | 519(1)  | 5463(1) | 25(1) |
| C(26) | 7560(1)  | 1717(1) | 5714(1) | 23(1) |
| C(27) | 8746(1)  | 2622(1) | 4686(1) | 21(1) |
| C(28) | 14053(2) | 2821(1) | 1790(1) | 32(1) |
| O(20) | 7325(1)  | 8587(1) | -346(1) | 30(1) |

**Table S24.** Bond lengths [ $\text{\AA}$ ] and angles [ $^\circ$ ] for **17**.

|             |            |             |            |
|-------------|------------|-------------|------------|
| O(5)-C(5)   | 1.2203(14) | C(7)-C(12)  | 1.4067(15) |
| O(14)-C(13) | 1.3681(13) | C(8)-H(8)   | 0.9500     |
| O(14)-C(15) | 1.3780(13) | C(8)-C(9)   | 1.3932(17) |
| O(16)-C(16) | 1.2420(14) | C(9)-H(9)   | 0.9500     |
| O(19)-C(18) | 1.3549(13) | C(9)-C(10)  | 1.3959(18) |
| O(19)-C(20) | 1.3606(13) | C(10)-H(10) | 0.9500     |
| N(1)-H(1)   | 0.933(18)  | C(10)-C(11) | 1.3914(18) |
| N(1)-C(2)   | 1.3590(14) | C(11)-H(11) | 0.9500     |
| N(1)-C(12)  | 1.4026(15) | C(11)-C(12) | 1.3870(16) |
| N(3)-N(4)   | 1.4256(12) | C(13)-C(22) | 1.3279(15) |
| N(3)-C(2)   | 1.3030(15) | C(15)-C(16) | 1.4557(15) |
| N(4)-C(5)   | 1.3880(14) | C(15)-C(20) | 1.3505(15) |
| N(4)-C(13)  | 1.4053(14) | C(16)-C(17) | 1.4397(17) |
| N(6)-C(2)   | 1.3702(14) | C(17)-H(17) | 0.9500     |
| N(6)-C(5)   | 1.3856(14) | C(17)-C(18) | 1.3465(17) |
| N(6)-C(7)   | 1.4086(14) | C(18)-C(28) | 1.4861(17) |
| C(7)-C(8)   | 1.3753(16) | C(20)-C(21) | 1.5000(15) |

|                   |            |                   |            |
|-------------------|------------|-------------------|------------|
| C(21)-C(22)       | 1.5118(15) | O(5)-C(5)-N(4)    | 130.16(10) |
| C(21)-C(23)       | 1.5537(14) | O(5)-C(5)-N(6)    | 128.13(11) |
| C(21)-C(27)       | 1.5505(14) | N(6)-C(5)-N(4)    | 101.71(9)  |
| C(22)-H(22)       | 0.9500     | C(8)-C(7)-N(6)    | 132.39(10) |
| C(23)-H(23A)      | 0.9900     | C(8)-C(7)-C(12)   | 123.08(11) |
| C(23)-H(23B)      | 0.9900     | C(12)-C(7)-N(6)   | 104.51(9)  |
| C(23)-C(24)       | 1.5298(15) | C(7)-C(8)-H(8)    | 121.9      |
| C(24)-H(24A)      | 0.9900     | C(7)-C(8)-C(9)    | 116.21(11) |
| C(24)-H(24B)      | 0.9900     | C(9)-C(8)-H(8)    | 121.9      |
| C(24)-C(25)       | 1.5277(16) | C(8)-C(9)-H(9)    | 119.3      |
| C(25)-H(25A)      | 0.9900     | C(8)-C(9)-C(10)   | 121.39(11) |
| C(25)-H(25B)      | 0.9900     | C(10)-C(9)-H(9)   | 119.3      |
| C(25)-C(26)       | 1.5276(15) | C(9)-C(10)-H(10)  | 119.0      |
| C(26)-H(26A)      | 0.9900     | C(11)-C(10)-C(9)  | 122.01(11) |
| C(26)-H(26B)      | 0.9900     | C(11)-C(10)-H(10) | 119.0      |
| C(26)-C(27)       | 1.5307(15) | C(10)-C(11)-H(11) | 121.6      |
| C(27)-H(27A)      | 0.9900     | C(12)-C(11)-C(10) | 116.90(11) |
| C(27)-H(27B)      | 0.9900     | C(12)-C(11)-H(11) | 121.6      |
| C(28)-H(28A)      | 0.9800     | N(1)-C(12)-C(7)   | 109.58(10) |
| C(28)-H(28B)      | 0.9800     | C(11)-C(12)-N(1)  | 130.05(10) |
| C(28)-H(28C)      | 0.9800     | C(11)-C(12)-C(7)  | 120.38(11) |
| O(20)-H(20A)      | 0.93(2)    | O(14)-C(13)-N(4)  | 109.57(9)  |
| O(20)-H(20B)      | 0.88(2)    | C(22)-C(13)-O(14) | 125.80(10) |
| C(13)-O(14)-C(15) | 115.26(8)  | C(22)-C(13)-N(4)  | 124.61(10) |
| C(18)-O(19)-C(20) | 120.11(9)  | O(14)-C(15)-C(16) | 115.42(9)  |
| C(2)-N(1)-H(1)    | 124.0(11)  | C(20)-C(15)-O(14) | 122.62(10) |
| C(2)-N(1)-C(12)   | 106.84(9)  | C(20)-C(15)-C(16) | 121.96(10) |
| C(12)-N(1)-H(1)   | 125.6(11)  | O(16)-C(16)-C(15) | 123.55(11) |
| C(2)-N(3)-N(4)    | 101.36(9)  | O(16)-C(16)-C(17) | 123.49(11) |
| C(5)-N(4)-N(3)    | 113.79(9)  | C(17)-C(16)-C(15) | 112.97(10) |
| C(5)-N(4)-C(13)   | 125.69(9)  | C(16)-C(17)-H(17) | 118.8      |
| C(13)-N(4)-N(3)   | 120.51(9)  | C(18)-C(17)-C(16) | 122.46(11) |
| C(2)-N(6)-C(5)    | 108.90(9)  | C(18)-C(17)-H(17) | 118.8      |
| C(2)-N(6)-C(7)    | 109.41(9)  | O(19)-C(18)-C(28) | 111.39(10) |
| C(5)-N(6)-C(7)    | 141.49(10) | C(17)-C(18)-O(19) | 121.37(11) |
| N(1)-C(2)-N(6)    | 109.59(10) | C(17)-C(18)-C(28) | 127.24(11) |
| N(3)-C(2)-N(1)    | 136.18(11) | O(19)-C(20)-C(21) | 113.30(9)  |
| N(3)-C(2)-N(6)    | 114.22(10) | C(15)-C(20)-O(19) | 121.10(10) |

|                     |            |                     |           |
|---------------------|------------|---------------------|-----------|
| C(15)-C(20)-C(21)   | 125.59(10) | C(24)-C(25)-C(26)   | 111.64(9) |
| C(20)-C(21)-C(22)   | 106.40(9)  | H(25A)-C(25)-H(25B) | 108.0     |
| C(20)-C(21)-C(23)   | 109.73(9)  | C(26)-C(25)-H(25A)  | 109.3     |
| C(20)-C(21)-C(27)   | 109.90(9)  | C(26)-C(25)-H(25B)  | 109.3     |
| C(22)-C(21)-C(23)   | 110.50(9)  | C(25)-C(26)-H(26A)  | 109.1     |
| C(22)-C(21)-C(27)   | 111.30(9)  | C(25)-C(26)-H(26B)  | 109.1     |
| C(27)-C(21)-C(23)   | 108.99(8)  | C(25)-C(26)-C(27)   | 112.46(9) |
| C(13)-C(22)-C(21)   | 123.42(10) | H(26A)-C(26)-H(26B) | 107.8     |
| C(13)-C(22)-H(22)   | 118.3      | C(27)-C(26)-H(26A)  | 109.1     |
| C(21)-C(22)-H(22)   | 118.3      | C(27)-C(26)-H(26B)  | 109.1     |
| C(21)-C(23)-H(23A)  | 109.3      | C(21)-C(27)-H(27A)  | 109.1     |
| C(21)-C(23)-H(23B)  | 109.3      | C(21)-C(27)-H(27B)  | 109.1     |
| H(23A)-C(23)-H(23B) | 107.9      | C(26)-C(27)-C(21)   | 112.42(9) |
| C(24)-C(23)-C(21)   | 111.73(9)  | C(26)-C(27)-H(27A)  | 109.1     |
| C(24)-C(23)-H(23A)  | 109.3      | C(26)-C(27)-H(27B)  | 109.1     |
| C(24)-C(23)-H(23B)  | 109.3      | H(27A)-C(27)-H(27B) | 107.9     |
| C(23)-C(24)-H(24A)  | 109.5      | C(18)-C(28)-H(28A)  | 109.5     |
| C(23)-C(24)-H(24B)  | 109.5      | C(18)-C(28)-H(28B)  | 109.5     |
| H(24A)-C(24)-H(24B) | 108.1      | C(18)-C(28)-H(28C)  | 109.5     |
| C(25)-C(24)-C(23)   | 110.88(9)  | H(28A)-C(28)-H(28B) | 109.5     |
| C(25)-C(24)-H(24A)  | 109.5      | H(28A)-C(28)-H(28C) | 109.5     |
| C(25)-C(24)-H(24B)  | 109.5      | H(28B)-C(28)-H(28C) | 109.5     |
| C(24)-C(25)-H(25A)  | 109.3      | H(20A)-O(20)-H(20B) | 103.5(17) |
| C(24)-C(25)-H(25B)  | 109.3      |                     |           |

**Table S25.** Anisotropic displacement parameters ( $\text{\AA}^2 \times 10^3$ ) for **17**. The anisotropic displacement factor exponent takes the form:  $-2p^2 [h^2 a^* 2U^{11} + \dots + 2hka^* b^* U^{12}]$

|       | U <sup>11</sup> | U <sup>22</sup> | U <sup>33</sup> | U <sup>23</sup> | U <sup>13</sup> | U <sup>12</sup> |
|-------|-----------------|-----------------|-----------------|-----------------|-----------------|-----------------|
| O(5)  | 26(1)           | 20(1)           | 30(1)           | -1(1)           | -3(1)           | -6(1)           |
| O(14) | 24(1)           | 21(1)           | 20(1)           | -2(1)           | -2(1)           | -5(1)           |
| O(16) | 34(1)           | 23(1)           | 24(1)           | -1(1)           | -1(1)           | -9(1)           |
| O(19) | 20(1)           | 24(1)           | 22(1)           | -5(1)           | -2(1)           | -7(1)           |
| N(1)  | 27(1)           | 20(1)           | 23(1)           | -2(1)           | -7(1)           | -4(1)           |

|       |       |       |       |        |        |        |
|-------|-------|-------|-------|--------|--------|--------|
| N(3)  | 27(1) | 18(1) | 21(1) | 1(1)   | -6(1)  | -5(1)  |
| N(4)  | 23(1) | 18(1) | 21(1) | 0(1)   | -5(1)  | -5(1)  |
| N(6)  | 23(1) | 19(1) | 21(1) | -4(1)  | -5(1)  | -5(1)  |
| C(2)  | 26(1) | 20(1) | 18(1) | -3(1)  | -6(1)  | -6(1)  |
| C(5)  | 24(1) | 20(1) | 22(1) | -6(1)  | -5(1)  | -5(1)  |
| C(7)  | 24(1) | 22(1) | 23(1) | -9(1)  | -8(1)  | -3(1)  |
| C(8)  | 28(1) | 24(1) | 27(1) | -9(1)  | -6(1)  | -6(1)  |
| C(9)  | 26(1) | 34(1) | 33(1) | -15(1) | -5(1)  | -7(1)  |
| C(10) | 27(1) | 32(1) | 32(1) | -14(1) | -11(1) | 1(1)   |
| C(11) | 32(1) | 25(1) | 25(1) | -9(1)  | -11(1) | -1(1)  |
| C(12) | 27(1) | 23(1) | 20(1) | -8(1)  | -7(1)  | -5(1)  |
| C(13) | 22(1) | 22(1) | 20(1) | -6(1)  | -3(1)  | -6(1)  |
| C(15) | 23(1) | 22(1) | 20(1) | -7(1)  | -4(1)  | -6(1)  |
| C(16) | 30(1) | 23(1) | 19(1) | -6(1)  | -3(1)  | -10(1) |
| C(17) | 24(1) | 30(1) | 24(1) | -6(1)  | -1(1)  | -12(1) |
| C(18) | 23(1) | 30(1) | 24(1) | -8(1)  | -2(1)  | -11(1) |
| C(20) | 22(1) | 22(1) | 20(1) | -8(1)  | -4(1)  | -6(1)  |
| C(21) | 22(1) | 19(1) | 18(1) | -4(1)  | -4(1)  | -6(1)  |
| C(22) | 22(1) | 23(1) | 21(1) | -3(1)  | -3(1)  | -5(1)  |
| C(23) | 27(1) | 23(1) | 21(1) | -7(1)  | -4(1)  | -9(1)  |
| C(24) | 30(1) | 25(1) | 25(1) | -7(1)  | -5(1)  | -12(1) |
| C(25) | 27(1) | 21(1) | 23(1) | -3(1)  | -4(1)  | -8(1)  |
| C(26) | 25(1) | 23(1) | 18(1) | -4(1)  | -5(1)  | -5(1)  |
| C(27) | 24(1) | 21(1) | 20(1) | -6(1)  | -5(1)  | -6(1)  |
| C(28) | 22(1) | 36(1) | 32(1) | -5(1)  | -3(1)  | -8(1)  |
| O(20) | 34(1) | 22(1) | 27(1) | -1(1)  | -4(1)  | -8(1)  |

---

**Table S26.** Hydrogen coordinates ( $\times 10^4$ ) and isotropic displacement parameters ( $\text{\AA}^2 \times 10^3$ ) for **17**.

|        | x        | y        | z        | U(eq) |
|--------|----------|----------|----------|-------|
| H(1)   | 2420(20) | 9718(18) | 764(16)  | 46(5) |
| H(8)   | -983     | 5935     | 3947     | 31    |
| H(9)   | -3571    | 7367     | 3711     | 36    |
| H(10)  | -3643    | 9530     | 2293     | 35    |
| H(11)  | -1148    | 10397    | 1091     | 32    |
| H(17)  | 13151    | 5333     | 243      | 32    |
| H(22)  | 5629     | 3747     | 4051     | 29    |
| H(23A) | 7678     | 2097     | 2475     | 28    |
| H(23B) | 9189     | 1267     | 3174     | 28    |
| H(24A) | 5669     | 1479     | 4290     | 31    |
| H(24B) | 6769     | 156      | 4098     | 31    |
| H(25A) | 8431     | -93      | 5462     | 30    |
| H(25B) | 6482     | 20       | 6111     | 30    |
| H(26A) | 8016     | 1387     | 6458     | 27    |
| H(26B) | 6437     | 2248     | 5845     | 27    |
| H(27A) | 9912     | 2135     | 4640     | 25    |
| H(27B) | 8750     | 3424     | 4858     | 25    |
| H(28A) | 14296    | 2652     | 2573     | 48    |
| H(28B) | 14968    | 3240     | 1154     | 48    |
| H(28C) | 13966    | 1971     | 1744     | 48    |
| H(20A) | 8320(30) | 8010(20) | -198(18) | 64(6) |
| H(20B) | 6560(30) | 8208(19) | 279(18)  | 55(5) |

**Table S27.** Torsion angles [°] for 17.

|                         |             |                         |             |
|-------------------------|-------------|-------------------------|-------------|
| O(14)-C(13)-C(22)-C(21) | -6.06(18)   | C(7)-N(6)-C(5)-N(4)     | -175.01(13) |
| O(14)-C(15)-C(16)-O(16) | 2.32(16)    | C(7)-C(8)-C(9)-C(10)    | -0.54(17)   |
| O(14)-C(15)-C(16)-C(17) | -177.58(9)  | C(8)-C(7)-C(12)-N(1)    | 178.60(10)  |
| O(14)-C(15)-C(20)-O(19) | 177.50(9)   | C(8)-C(7)-C(12)-C(11)   | -1.37(17)   |
| O(14)-C(15)-C(20)-C(21) | -2.06(17)   | C(8)-C(9)-C(10)-C(11)   | -1.19(19)   |
| O(16)-C(16)-C(17)-C(18) | 179.19(11)  | C(9)-C(10)-C(11)-C(12)  | 1.63(17)    |
| O(19)-C(20)-C(21)-C(22) | 174.50(8)   | C(10)-C(11)-C(12)-N(1)  | 179.64(11)  |
| O(19)-C(20)-C(21)-C(23) | -65.94(11)  | C(10)-C(11)-C(12)-C(7)  | -0.40(16)   |
| O(19)-C(20)-C(21)-C(27) | 53.89(12)   | C(12)-N(1)-C(2)-N(3)    | -176.85(13) |
| N(3)-N(4)-C(5)-O(5)     | -179.25(11) | C(12)-N(1)-C(2)-N(6)    | 2.59(12)    |
| N(3)-N(4)-C(5)-N(6)     | 0.84(12)    | C(12)-C(7)-C(8)-C(9)    | 1.80(17)    |
| N(3)-N(4)-C(13)-O(14)   | -12.23(14)  | C(13)-O(14)-C(15)-C(16) | -173.21(9)  |
| N(3)-N(4)-C(13)-C(22)   | 169.16(11)  | C(13)-O(14)-C(15)-C(20) | 7.00(15)    |
| N(4)-N(3)-C(2)-N(1)     | 179.12(13)  | C(13)-N(4)-C(5)-O(5)    | 1.66(19)    |
| N(4)-N(3)-C(2)-N(6)     | -0.30(12)   | C(13)-N(4)-C(5)-N(6)    | -178.26(10) |
| N(4)-C(13)-C(22)-C(21)  | 172.32(10)  | C(15)-O(14)-C(13)-N(4)  | 178.37(8)   |
| N(6)-C(7)-C(8)-C(9)     | 179.90(11)  | C(15)-O(14)-C(13)-C(22) | -3.04(16)   |
| N(6)-C(7)-C(12)-N(1)    | 0.05(12)    | C(15)-C(16)-C(17)-C(18) | -0.91(16)   |
| N(6)-C(7)-C(12)-C(11)   | -179.92(10) | C(15)-C(20)-C(21)-C(22) | -5.91(15)   |
| C(2)-N(1)-C(12)-C(7)    | -1.62(12)   | C(15)-C(20)-C(21)-C(23) | 113.65(12)  |
| C(2)-N(1)-C(12)-C(11)   | 178.35(11)  | C(15)-C(20)-C(21)-C(27) | -126.52(11) |
| C(2)-N(3)-N(4)-C(5)     | -0.36(12)   | C(16)-C(15)-C(20)-O(19) | -2.27(16)   |
| C(2)-N(3)-N(4)-C(13)    | 178.78(9)   | C(16)-C(15)-C(20)-C(21) | 178.16(10)  |
| C(2)-N(6)-C(5)-O(5)     | 179.12(11)  | C(16)-C(17)-C(18)-O(19) | -0.38(18)   |
| C(2)-N(6)-C(5)-N(4)     | -0.97(11)   | C(16)-C(17)-C(18)-C(28) | 179.97(11)  |
| C(2)-N(6)-C(7)-C(8)     | -176.81(12) | C(18)-O(19)-C(20)-C(15) | 0.85(15)    |
| C(2)-N(6)-C(7)-C(12)    | 1.54(12)    | C(18)-O(19)-C(20)-C(21) | -179.54(9)  |
| C(5)-N(4)-C(13)-O(14)   | 166.81(10)  | C(20)-O(19)-C(18)-C(17) | 0.49(16)    |
| C(5)-N(4)-C(13)-C(22)   | -11.80(18)  | C(20)-O(19)-C(18)-C(28) | -179.81(9)  |
| C(5)-N(6)-C(2)-N(1)     | -178.71(9)  | C(20)-C(15)-C(16)-O(16) | -177.88(11) |
| C(5)-N(6)-C(2)-N(3)     | 0.86(13)    | C(20)-C(15)-C(16)-C(17) | 2.21(15)    |
| C(5)-N(6)-C(7)-C(8)     | -2.8(2)     | C(20)-C(21)-C(22)-C(13) | 9.70(15)    |
| C(5)-N(6)-C(7)-C(12)    | 175.57(13)  | C(20)-C(21)-C(23)-C(24) | 177.01(9)   |
| C(7)-N(6)-C(2)-N(1)     | -2.64(12)   | C(20)-C(21)-C(27)-C(26) | -174.33(9)  |
| C(7)-N(6)-C(2)-N(3)     | 176.94(9)   | C(21)-C(23)-C(24)-C(25) | -57.90(13)  |
| C(7)-N(6)-C(5)-O(5)     | 5.1(2)      | C(22)-C(21)-C(23)-C(24) | -65.97(11)  |



|                         |             |                         |            |
|-------------------------|-------------|-------------------------|------------|
| C(22)-C(21)-C(27)-C(26) | 68.06(11)   | C(24)-C(25)-C(26)-C(27) | -53.09(13) |
| C(23)-C(21)-C(22)-C(13) | -109.36(12) | C(25)-C(26)-C(27)-C(21) | 53.30(12)  |
| C(23)-C(21)-C(27)-C(26) | -54.05(12)  | C(27)-C(21)-C(22)-C(13) | 129.41(11) |
| C(23)-C(24)-C(25)-C(26) | 55.15(13)   | C(27)-C(21)-C(23)-C(24) | 56.62(12)  |

**Table S28.** Hydrogen bonds for **17** [Å and °].

| D-H...A                | d(D-H)    | d(H...A)  | d(D...A)   | <(DHA)    |
|------------------------|-----------|-----------|------------|-----------|
| N(1)-H(1)...O(20)#1    | 0.933(18) | 1.771(18) | 2.6741(13) | 162.0(16) |
| C(22)-H(22)...O(5)     | 0.95      | 2.34      | 2.9520(14) | 122.0     |
| C(28)-H(28C)...O(20)#2 | 0.98      | 2.58      | 3.3228(16) | 132.4     |

Symmetry transformations used to generate equivalent atoms:

#1 -x+1,-y+2,-z #2 -x+2,-y+1,-z

## 8.5 Compound 18b

X-ray diffraction data were collected at 100K on a four-circle Rigaku Synergy S diffractometer equipped with a HyPix6000HE area-detector (kappa geometry, shutterless  $\omega$ -scan technique), using monochromatized Cu  $K_{\alpha}$ -radiation. The intensity data were integrated and corrected for absorption and decay by the CrysAlisPro program.<sup>6</sup> The structure was solved by direct methods using SHELXT<sup>4</sup> and refined on  $F^2$  using SHELXL-2018<sup>5</sup> in the OLEX2 program.<sup>7</sup> All non-hydrogen atoms were refined with individual anisotropic displacement parameters. Locations of amino hydrogen atoms (H5D, H5K) were found from the electron density-difference map; these hydrogen atoms were refined with individual isotropic displacement parameters. All other hydrogen atoms were placed in ideal calculated positions and refined as riding atoms with relative isotropic displacement parameters.

**Table S29.** Crystal data and structure refinement for **18b**.

---

|                                   |                                                                                                              |
|-----------------------------------|--------------------------------------------------------------------------------------------------------------|
| Identification code               | <b>18b</b>                                                                                                   |
| Empirical formula                 | C <sub>19</sub> H <sub>23</sub> N <sub>5</sub> O <sub>5</sub>                                                |
| Formula weight                    | 401.42                                                                                                       |
| Temperature                       | 100.00(10) K                                                                                                 |
| Wavelength                        | 1.54184 Å                                                                                                    |
| Crystal system                    | Monoclinic                                                                                                   |
| Space group                       | I 1 2/a 1                                                                                                    |
| Unit cell dimensions              | a = 19.5566(2) Å      a = 90°.<br>b = 9.65170(10) Å      b = 95.9400(10)°.<br>c = 21.0321(2) Å      g = 90°. |
| Volume                            | 3948.59(7) Å <sup>3</sup>                                                                                    |
| Z                                 | 8                                                                                                            |
| Density (calculated)              | 1.351 g/cm <sup>3</sup>                                                                                      |
| Absorption coefficient            | 0.832 mm <sup>-1</sup>                                                                                       |
| F(000)                            | 1696                                                                                                         |
| Crystal size                      | 0.14 x 0.13 x 0.08 mm <sup>3</sup>                                                                           |
| Theta range for data collection   | 4.227 to 77.853°.                                                                                            |
| Index ranges                      | -24 ≤ h ≤ 24, -11 ≤ k ≤ 11, -26 ≤ l ≤ 23                                                                     |
| Reflections collected             | 26476                                                                                                        |
| Independent reflections           | 4156 [R(int) = 0.0258]                                                                                       |
| Observed reflections              | 4091                                                                                                         |
| Completeness to theta = 67.684°   | 99.9 %                                                                                                       |
| Absorption correction             | Semi-empirical from equivalents                                                                              |
| Max. and min. transmission        | 1.00000 and 0.89830                                                                                          |
| Refinement method                 | Full-matrix least-squares on F <sup>2</sup>                                                                  |
| Data / restraints / parameters    | 4156 / 32 / 306                                                                                              |
| Goodness-of-fit on F <sup>2</sup> | 1.285                                                                                                        |
| Final R indices [I > 2σ(I)]       | R1 = 0.0562, wR2 = 0.1258                                                                                    |
| R indices (all data)              | R1 = 0.0567, wR2 = 0.1260                                                                                    |
| Largest diff. peak and hole       | 0.233 and -0.270 e.Å <sup>-3</sup>                                                                           |
| CCDC                              | 2270307                                                                                                      |

---

**Table S30.** Atomic coordinates ( $\times 10^4$ ) and equivalent isotropic displacement parameters ( $\text{\AA}^2 \times 10^3$ ) for **18b**.  $U(\text{eq})$  is defined as one third of the trace of the orthogonalized  $U_{ij}$  tensor.

|        | x        | y        | z        | U(eq) |
|--------|----------|----------|----------|-------|
| O(1)   | 5687(1)  | 4668(2)  | 4300(1)  | 27(1) |
| O(2)   | 8023(1)  | 5096(1)  | 4104(1)  | 20(1) |
| O(3)   | 9195(1)  | 1908(2)  | 3557(1)  | 31(1) |
| O(4)   | 7790(1)  | 1715(2)  | 3351(1)  | 27(1) |
| O(5)   | 7150(1)  | -337(2)  | 2791(1)  | 27(1) |
| O(5A)  | 6337(3)  | 509(6)   | 2636(3)  | 27(1) |
| N(1)   | 6743(2)  | 863(3)   | 2815(1)  | 24(1) |
| N(1A)  | 7016(4)  | 495(8)   | 2911(4)  | 24(1) |
| C(1)   | 6949(1)  | 3940(2)  | 3756(1)  | 21(1) |
| C(2)   | 6649(1)  | 5412(2)  | 3737(1)  | 26(1) |
| C(3)   | 5873(1)  | 5379(3)  | 3747(1)  | 31(1) |
| C(4)   | 5905(1)  | 3257(2)  | 4305(1)  | 24(1) |
| C(5)   | 6681(1)  | 3153(2)  | 4323(1)  | 21(1) |
| C(6)   | 7718(1)  | 3943(2)  | 3830(1)  | 19(1) |
| C(7)   | 8725(1)  | 5178(2)  | 4188(1)  | 21(1) |
| C(8)   | 9120(1)  | 4133(2)  | 4018(1)  | 24(1) |
| C(9)   | 8840(1)  | 2890(2)  | 3722(1)  | 23(1) |
| C(10)  | 8097(1)  | 2885(2)  | 3633(1)  | 21(1) |
| C(11)  | 7108(1)  | 1817(2)  | 3098(1)  | 28(1) |
| C(12)  | 6758(1)  | 3182(3)  | 3118(1)  | 28(1) |
| C(13)  | 8963(1)  | 6534(2)  | 4464(1)  | 26(1) |
| N(2)   | 3711(4)  | 2748(7)  | 2733(3)  | 28(1) |
| N(3)   | 4127(8)  | 753(13)  | 3102(9)  | 26(2) |
| C(14)  | 4412(5)  | 2724(8)  | 2696(4)  | 30(2) |
| C(15)  | 4667(6)  | 1466(13) | 2895(10) | 30(2) |
| C(16)  | 3561(6)  | 1530(13) | 2962(9)  | 29(1) |
| N(2A)  | 3958(6)  | 2855(10) | 2662(5)  | 28(1) |
| N(3A)  | 4199(11) | 730(19)  | 3001(13) | 26(2) |
| C(14A) | 4647(6)  | 2560(12) | 2628(6)  | 30(2) |
| C(15A) | 4818(9)  | 1290(20) | 2884(15) | 30(2) |
| C(16A) | 3711(8)  | 1720(19) | 2907(12) | 29(1) |
| N(4)   | 4269(7)  | 164(9)   | 5106(5)  | 26(1) |
| N(5)   | 3163(9)  | 456(18)  | 5186(11) | 26(1) |

|        |          |         |          |       |
|--------|----------|---------|----------|-------|
| C(17)  | 3522(17) | 910(60) | 5744(17) | 29(2) |
| C(18)  | 4201(17) | 710(50) | 5700(11) | 33(1) |
| C(19)  | 3641(8)  | 50(30)  | 4808(7)  | 23(2) |
| N(4A)  | 3258(10) | 387(18) | 5187(12) | 26(1) |
| N(5A)  | 4394(7)  | 350(9)  | 5246(5)  | 26(1) |
| C(17A) | 4208(17) | 830(50) | 5820(11) | 33(1) |
| C(18A) | 3513(17) | 830(60) | 5786(17) | 29(2) |
| C(19A) | 3809(7)  | 80(30)  | 4888(8)  | 23(2) |

**Table S31.** Bond lengths [ $\text{\AA}$ ] and angles [ $^\circ$ ] for **18b**.

|             |          |              |          |
|-------------|----------|--------------|----------|
| O(1)-C(3)   | 1.429(3) | C(4)-C(5)    | 1.517(3) |
| O(1)-C(4)   | 1.427(3) | C(5)-H(5B)   | 0.9900   |
| O(2)-C(6)   | 1.361(2) | C(5)-H(5C)   | 0.9900   |
| O(2)-C(7)   | 1.368(2) | C(6)-C(10)   | 1.351(3) |
| O(3)-C(9)   | 1.246(3) | C(7)-C(8)    | 1.341(3) |
| O(4)-C(10)  | 1.384(2) | C(7)-C(13)   | 1.487(3) |
| O(4)-C(11)  | 1.388(3) | C(8)-H(8)    | 0.9500   |
| O(5)-H(5)   | 0.8400   | C(8)-C(9)    | 1.435(3) |
| O(5)-N(1)   | 1.410(3) | C(9)-C(10)   | 1.446(3) |
| O(5A)-H(5A) | 0.8400   | C(11)-C(12)  | 1.486(3) |
| O(5A)-N(1A) | 1.392(8) | C(12)-H(12A) | 0.9900   |
| N(1)-C(11)  | 1.274(3) | C(12)-H(12B) | 0.9900   |
| N(1A)-C(11) | 1.342(8) | C(13)-H(13A) | 0.9800   |
| C(1)-C(2)   | 1.536(3) | C(13)-H(13B) | 0.9800   |
| C(1)-C(5)   | 1.549(3) | C(13)-H(13C) | 0.9800   |
| C(1)-C(6)   | 1.497(3) | N(2)-C(14)   | 1.381(6) |
| C(1)-C(12)  | 1.541(3) | N(2)-C(16)   | 1.315(8) |
| C(2)-H(2A)  | 0.9900   | N(3)-H(3)    | 0.8800   |
| C(2)-H(2B)  | 0.9900   | N(3)-C(15)   | 1.369(8) |
| C(2)-C(3)   | 1.521(3) | N(3)-C(16)   | 1.345(9) |
| C(3)-H(3A)  | 0.9900   | C(14)-H(14)  | 0.9500   |
| C(3)-H(3B)  | 0.9900   | C(14)-C(15)  | 1.361(7) |
| C(4)-H(4A)  | 0.9900   | C(15)-H(15)  | 0.9500   |
| C(4)-H(4B)  | 0.9900   | C(16)-H(16)  | 0.9500   |

|                   |            |                  |            |
|-------------------|------------|------------------|------------|
| N(2A)-C(14A)      | 1.386(8)   | C(6)-C(1)-C(12)  | 103.98(16) |
| N(2A)-C(16A)      | 1.324(11)  | C(12)-C(1)-C(5)  | 111.54(17) |
| N(3A)-H(3E)       | 0.8800     | C(1)-C(2)-H(2A)  | 109.4      |
| N(3A)-C(15A)      | 1.372(11)  | C(1)-C(2)-H(2B)  | 109.4      |
| N(3A)-C(16A)      | 1.352(12)  | H(2A)-C(2)-H(2B) | 108.0      |
| C(14A)-H(14A)     | 0.9500     | C(3)-C(2)-C(1)   | 111.01(18) |
| C(14A)-C(15A)     | 1.364(11)  | C(3)-C(2)-H(2A)  | 109.4      |
| C(15A)-H(15A)     | 0.9500     | C(3)-C(2)-H(2B)  | 109.4      |
| C(16A)-H(16A)     | 0.9500     | O(1)-C(3)-C(2)   | 111.09(17) |
| N(4)-C(18)        | 1.376(11)  | O(1)-C(3)-H(3A)  | 109.4      |
| N(4)-C(19)        | 1.324(10)  | O(1)-C(3)-H(3B)  | 109.4      |
| N(5)-H(5D)        | 0.80(5)    | C(2)-C(3)-H(3A)  | 109.4      |
| N(5)-C(17)        | 1.375(13)  | C(2)-C(3)-H(3B)  | 109.4      |
| N(5)-C(19)        | 1.347(10)  | H(3A)-C(3)-H(3B) | 108.0      |
| C(17)-H(17)       | 0.9500     | O(1)-C(4)-H(4A)  | 109.4      |
| C(17)-C(18)       | 1.352(10)  | O(1)-C(4)-H(4B)  | 109.4      |
| C(18)-H(18)       | 0.9500     | O(1)-C(4)-C(5)   | 111.08(17) |
| C(19)-H(19)       | 0.9500     | H(4A)-C(4)-H(4B) | 108.0      |
| N(4A)-C(18A)      | 1.375(12)  | C(5)-C(4)-H(4A)  | 109.4      |
| N(4A)-C(19A)      | 1.337(11)  | C(5)-C(4)-H(4B)  | 109.4      |
| N(5A)-H(5K)       | 0.98(7)    | C(1)-C(5)-H(5B)  | 109.3      |
| N(5A)-C(17A)      | 1.378(13)  | C(1)-C(5)-H(5C)  | 109.3      |
| N(5A)-C(19A)      | 1.329(10)  | C(4)-C(5)-C(1)   | 111.47(17) |
| C(17A)-H(17A)     | 0.9500     | C(4)-C(5)-H(5B)  | 109.3      |
| C(17A)-C(18A)     | 1.353(10)  | C(4)-C(5)-H(5C)  | 109.3      |
| C(18A)-H(18A)     | 0.9500     | H(5B)-C(5)-H(5C) | 108.0      |
| C(19A)-H(19A)     | 0.9500     | O(2)-C(6)-C(1)   | 115.91(17) |
| C(4)-O(1)-C(3)    | 111.32(17) | C(10)-C(6)-O(2)  | 121.20(18) |
| C(6)-O(2)-C(7)    | 119.42(16) | C(10)-C(6)-C(1)  | 122.88(18) |
| C(10)-O(4)-C(11)  | 117.61(17) | O(2)-C(7)-C(13)  | 111.76(18) |
| N(1)-O(5)-H(5)    | 109.5      | C(8)-C(7)-O(2)   | 121.37(19) |
| N(1A)-O(5A)-H(5A) | 109.5      | C(8)-C(7)-C(13)  | 126.8(2)   |
| C(11)-N(1)-O(5)   | 108.7(3)   | C(7)-C(8)-H(8)   | 118.7      |
| C(11)-N(1A)-O(5A) | 101.9(6)   | C(7)-C(8)-C(9)   | 122.6(2)   |
| C(2)-C(1)-C(5)    | 108.40(17) | C(9)-C(8)-H(8)   | 118.7      |
| C(2)-C(1)-C(12)   | 110.99(17) | O(3)-C(9)-C(8)   | 123.9(2)   |
| C(6)-C(1)-C(2)    | 112.15(17) | O(3)-C(9)-C(10)  | 122.9(2)   |
| C(6)-C(1)-C(5)    | 109.78(16) | C(8)-C(9)-C(10)  | 113.13(18) |

|                     |            |                      |           |
|---------------------|------------|----------------------|-----------|
| O(4)-C(10)-C(9)     | 116.33(18) | C(16A)-N(3A)-C(15A)  | 108.5(11) |
| C(6)-C(10)-O(4)     | 121.45(19) | N(2A)-C(14A)-H(14A)  | 124.3     |
| C(6)-C(10)-C(9)     | 122.20(19) | C(15A)-C(14A)-N(2A)  | 111.3(9)  |
| O(4)-C(11)-C(12)    | 118.63(18) | C(15A)-C(14A)-H(14A) | 124.3     |
| N(1)-C(11)-O(4)     | 126.7(2)   | N(3A)-C(15A)-H(15A)  | 128.0     |
| N(1)-C(11)-C(12)    | 114.6(2)   | C(14A)-C(15A)-N(3A)  | 104.0(10) |
| N(1A)-C(11)-O(4)    | 98.0(4)    | C(14A)-C(15A)-H(15A) | 128.0     |
| N(1A)-C(11)-C(12)   | 143.4(4)   | N(2A)-C(16A)-N(3A)   | 111.1(10) |
| C(1)-C(12)-H(12A)   | 109.2      | N(2A)-C(16A)-H(16A)  | 124.4     |
| C(1)-C(12)-H(12B)   | 109.2      | N(3A)-C(16A)-H(16A)  | 124.4     |
| C(11)-C(12)-C(1)    | 111.97(18) | C(19)-N(4)-C(18)     | 106.8(12) |
| C(11)-C(12)-H(12A)  | 109.2      | C(17)-N(5)-H(5D)     | 131(4)    |
| C(11)-C(12)-H(12B)  | 109.2      | C(19)-N(5)-H(5D)     | 123(4)    |
| H(12A)-C(12)-H(12B) | 107.9      | C(19)-N(5)-C(17)     | 105.7(16) |
| C(7)-C(13)-H(13A)   | 109.5      | N(5)-C(17)-H(17)     | 125.8     |
| C(7)-C(13)-H(13B)   | 109.5      | C(18)-C(17)-N(5)     | 108(2)    |
| C(7)-C(13)-H(13C)   | 109.5      | C(18)-C(17)-H(17)    | 125.8     |
| H(13A)-C(13)-H(13B) | 109.5      | N(4)-C(18)-H(18)     | 126.2     |
| H(13A)-C(13)-H(13C) | 109.5      | C(17)-C(18)-N(4)     | 107.6(19) |
| H(13B)-C(13)-H(13C) | 109.5      | C(17)-C(18)-H(18)    | 126.2     |
| C(16)-N(2)-C(14)    | 105.5(6)   | N(4)-C(19)-N(5)      | 111.3(7)  |
| C(15)-N(3)-H(3)     | 126.4      | N(4)-C(19)-H(19)     | 124.3     |
| C(16)-N(3)-H(3)     | 126.4      | N(5)-C(19)-H(19)     | 124.3     |
| C(16)-N(3)-C(15)    | 107.1(7)   | C(19A)-N(4A)-C(18A)  | 105.6(16) |
| N(2)-C(14)-H(14)    | 125.3      | C(17A)-N(5A)-H(5K)   | 127(5)    |
| C(15)-C(14)-N(2)    | 109.4(6)   | C(19A)-N(5A)-H(5K)   | 127(5)    |
| C(15)-C(14)-H(14)   | 125.3      | C(19A)-N(5A)-C(17A)  | 105.9(12) |
| N(3)-C(15)-H(15)    | 127.0      | N(5A)-C(17A)-H(17A)  | 126.0     |
| C(14)-C(15)-N(3)    | 106.1(7)   | C(18A)-C(17A)-N(5A)  | 107.9(19) |
| C(14)-C(15)-H(15)   | 127.0      | C(18A)-C(17A)-H(17A) | 126.0     |
| N(2)-C(16)-N(3)     | 111.6(7)   | N(4A)-C(18A)-H(18A)  | 125.8     |
| N(2)-C(16)-H(16)    | 124.2      | C(17A)-C(18A)-N(4A)  | 108(2)    |
| N(3)-C(16)-H(16)    | 124.2      | C(17A)-C(18A)-H(18A) | 125.8     |
| C(16A)-N(2A)-C(14A) | 104.3(9)   | N(4A)-C(19A)-H(19A)  | 123.9     |
| C(15A)-N(3A)-H(3E)  | 125.8      | N(5A)-C(19A)-N(4A)   | 112.1(7)  |
| C(16A)-N(3A)-H(3E)  | 125.8      | N(5A)-C(19A)-H(19A)  | 123.9     |

---

Symmetry transformations used to generate equivalent atoms:

**Table S32.** Anisotropic displacement parameters ( $\text{\AA}^2 \times 10^3$ ) for **18b**. The anisotropic displacement factor exponent takes the form:  $-2p^2[h^2 a^*2U^{11} + \dots + 2hka^*b^*U^{12}]$

|        | U <sup>11</sup> | U <sup>22</sup> | U <sup>33</sup> | U <sup>23</sup> | U <sup>13</sup> | U <sup>12</sup> |
|--------|-----------------|-----------------|-----------------|-----------------|-----------------|-----------------|
| O(1)   | 24(1)           | 29(1)           | 29(1)           | 5(1)            | 4(1)            | 3(1)            |
| O(2)   | 22(1)           | 17(1)           | 21(1)           | -3(1)           | 2(1)            | -1(1)           |
| O(3)   | 34(1)           | 23(1)           | 37(1)           | -2(1)           | 7(1)            | 7(1)            |
| O(4)   | 37(1)           | 18(1)           | 26(1)           | -7(1)           | 6(1)            | -5(1)           |
| O(5)   | 30(1)           | 20(1)           | 29(1)           | -7(1)           | 0(1)            | -4(1)           |
| O(5A)  | 30(1)           | 20(1)           | 29(1)           | -7(1)           | 0(1)            | -4(1)           |
| N(1)   | 27(2)           | 23(2)           | 21(1)           | -3(1)           | 3(1)            | -4(1)           |
| N(1A)  | 27(2)           | 23(2)           | 21(1)           | -3(1)           | 3(1)            | -4(1)           |
| C(1)   | 21(1)           | 23(1)           | 18(1)           | -1(1)           | 1(1)            | -1(1)           |
| C(2)   | 27(1)           | 24(1)           | 28(1)           | 7(1)            | 3(1)            | 1(1)            |
| C(3)   | 27(1)           | 33(1)           | 31(1)           | 11(1)           | 2(1)            | 4(1)            |
| C(4)   | 25(1)           | 25(1)           | 23(1)           | 1(1)            | 3(1)            | -2(1)           |
| C(5)   | 25(1)           | 19(1)           | 19(1)           | 0(1)            | 2(1)            | 0(1)            |
| C(6)   | 24(1)           | 18(1)           | 15(1)           | -1(1)           | 2(1)            | -1(1)           |
| C(7)   | 21(1)           | 22(1)           | 20(1)           | -1(1)           | 1(1)            | -3(1)           |
| C(8)   | 24(1)           | 24(1)           | 25(1)           | 0(1)            | 4(1)            | -1(1)           |
| C(9)   | 28(1)           | 21(1)           | 22(1)           | 2(1)            | 6(1)            | 3(1)            |
| C(10)  | 29(1)           | 16(1)           | 18(1)           | -2(1)           | 4(1)            | -3(1)           |
| C(11)  | 34(1)           | 32(1)           | 18(1)           | -7(1)           | 6(1)            | -14(1)          |
| C(12)  | 27(1)           | 38(1)           | 18(1)           | -4(1)           | 2(1)            | -6(1)           |
| C(13)  | 30(1)           | 21(1)           | 28(1)           | -4(1)           | 3(1)            | -4(1)           |
| N(2)   | 28(4)           | 26(2)           | 29(2)           | 2(1)            | -2(2)           | -1(3)           |
| N(3)   | 41(3)           | 21(1)           | 15(6)           | -1(2)           | -2(3)           | 4(1)            |
| C(14)  | 35(6)           | 23(2)           | 32(3)           | -1(2)           | 1(3)            | 2(3)            |
| C(15)  | 23(5)           | 28(3)           | 37(2)           | 0(3)            | -12(4)          | 4(3)            |
| C(16)  | 32(5)           | 29(3)           | 25(3)           | 0(2)            | -3(4)           | 2(3)            |
| N(2A)  | 28(4)           | 26(2)           | 29(2)           | 2(1)            | -2(2)           | -1(3)           |
| N(3A)  | 41(3)           | 21(1)           | 15(6)           | -1(2)           | -2(3)           | 4(1)            |
| C(14A) | 35(6)           | 23(2)           | 32(3)           | -1(2)           | 1(3)            | 2(3)            |
| C(15A) | 23(5)           | 28(3)           | 37(2)           | 0(3)            | -12(4)          | 4(3)            |
| C(16A) | 32(5)           | 29(3)           | 25(3)           | 0(2)            | -3(4)           | 2(3)            |
| N(4)   | 19(4)           | 22(1)           | 37(1)           | 3(1)            | 3(2)            | 3(1)            |

|        |       |       |       |      |      |      |
|--------|-------|-------|-------|------|------|------|
| N(5)   | 19(4) | 22(1) | 37(1) | 3(1) | 3(2) | 3(1) |
| C(17)  | 38(1) | 22(5) | 28(3) | 5(4) | 8(2) | 2(2) |
| C(18)  | 37(2) | 31(7) | 31(7) | 6(6) | 0(5) | 5(2) |
| C(19)  | 18(5) | 21(1) | 29(3) | 3(3) | 0(4) | 3(5) |
| N(4A)  | 19(4) | 22(1) | 37(1) | 3(1) | 3(2) | 3(1) |
| N(5A)  | 19(4) | 22(1) | 37(1) | 3(1) | 3(2) | 3(1) |
| C(17A) | 37(2) | 31(7) | 31(7) | 6(6) | 0(5) | 5(2) |
| C(18A) | 38(1) | 22(5) | 28(3) | 5(4) | 8(2) | 2(2) |
| C(19A) | 18(5) | 21(1) | 29(3) | 3(3) | 0(4) | 3(5) |

**Table S33.** Hydrogen coordinates ( $\times 10^4$ ) and isotropic displacement parameters ( $\text{\AA}^2 \times 10^3$ ) for **18b**.

|        | x    | y    | z    | U(eq) |
|--------|------|------|------|-------|
| H(5)   | 6907 | -989 | 2627 | 40    |
| H(5A)  | 6217 | -299 | 2526 | 40    |
| H(2A)  | 6860 | 5944 | 4109 | 31    |
| H(2B)  | 6764 | 5887 | 3344 | 31    |
| H(3A)  | 5695 | 6339 | 3745 | 37    |
| H(3B)  | 5660 | 4908 | 3357 | 37    |
| H(4A)  | 5688 | 2783 | 3917 | 29    |
| H(4B)  | 5753 | 2783 | 4683 | 29    |
| H(5B)  | 6815 | 2166 | 4305 | 25    |
| H(5C)  | 6896 | 3545 | 4730 | 25    |
| H(8)   | 9605 | 4220 | 4098 | 29    |
| H(12A) | 6254 | 3041 | 3055 | 33    |
| H(12B) | 6888 | 3766 | 2762 | 33    |
| H(13A) | 8712 | 6749 | 4832 | 40    |
| H(13B) | 8876 | 7259 | 4140 | 40    |
| H(13C) | 9456 | 6486 | 4602 | 40    |
| H(3)   | 4147 | -61  | 3292 | 31    |
| H(14)  | 4676 | 3468 | 2555 | 36    |
| H(15)  | 5126 | 1148 | 2890 | 36    |



|        |          |         |          |        |
|--------|----------|---------|----------|--------|
| H(16)  | 3108     | 1236    | 3021     | 35     |
| H(3E)  | 4132     | -131    | 3118     | 31     |
| H(14A) | 4960     | 3163    | 2448     | 36     |
| H(15A) | 5262     | 893     | 2963     | 36     |
| H(16A) | 3250     | 1616    | 3005     | 35     |
| H(5D)  | 2760(20) | 390(40) | 5080(20) | 16(12) |
| H(17)  | 3327     | 1289    | 6100     | 35     |
| H(18)  | 4565     | 922     | 6021     | 40     |
| H(19)  | 3540     | -281    | 4383     | 28     |
| H(5K)  | 4860(40) | 240(80) | 5130(40) | 60(20) |
| H(17A) | 4513     | 1120    | 6177     | 40     |
| H(18A) | 3246     | 1093    | 6119     | 35     |
| H(19A) | 3786     | -296    | 4468     | 28     |

**Table S34.** Torsion angles [ $^{\circ}$ ] for **18b**.

|                         |             |                       |             |
|-------------------------|-------------|-----------------------|-------------|
| O(1)-C(4)-C(5)-C(1)     | -56.4(2)    | C(2)-C(1)-C(12)-C(11) | 173.44(18)  |
| O(2)-C(6)-C(10)-O(4)    | -179.54(17) | C(3)-O(1)-C(4)-C(5)   | 61.3(2)     |
| O(2)-C(6)-C(10)-C(9)    | 2.2(3)      | C(4)-O(1)-C(3)-C(2)   | -62.0(2)    |
| O(2)-C(7)-C(8)-C(9)     | 2.0(3)      | C(5)-C(1)-C(2)-C(3)   | -51.4(2)    |
| O(3)-C(9)-C(10)-O(4)    | -0.1(3)     | C(5)-C(1)-C(6)-O(2)   | -96.5(2)    |
| O(3)-C(9)-C(10)-C(6)    | 178.2(2)    | C(5)-C(1)-C(6)-C(10)  | 84.3(2)     |
| O(4)-C(11)-C(12)-C(1)   | -40.8(3)    | C(5)-C(1)-C(12)-C(11) | -65.6(2)    |
| O(5)-N(1)-C(11)-O(4)    | -0.6(4)     | C(6)-O(2)-C(7)-C(8)   | -1.4(3)     |
| O(5)-N(1)-C(11)-C(12)   | 175.85(19)  | C(6)-O(2)-C(7)-C(13)  | 177.22(17)  |
| O(5A)-N(1A)-C(11)-O(4)  | -178.9(5)   | C(6)-C(1)-C(2)-C(3)   | -172.79(17) |
| O(5A)-N(1A)-C(11)-C(12) | 1.0(10)     | C(6)-C(1)-C(5)-C(4)   | 173.91(17)  |
| N(1)-C(11)-C(12)-C(1)   | 142.4(2)    | C(6)-C(1)-C(12)-C(11) | 52.7(2)     |
| N(1A)-C(11)-C(12)-C(1)  | 139.3(6)    | C(7)-O(2)-C(6)-C(1)   | 179.98(16)  |
| C(1)-C(2)-C(3)-O(1)     | 57.6(2)     | C(7)-O(2)-C(6)-C(10)  | -0.7(3)     |
| C(1)-C(6)-C(10)-O(4)    | -0.3(3)     | C(7)-C(8)-C(9)-O(3)   | 179.7(2)    |
| C(1)-C(6)-C(10)-C(9)    | -178.53(18) | C(7)-C(8)-C(9)-C(10)  | -0.5(3)     |
| C(2)-C(1)-C(5)-C(4)     | 51.1(2)     | C(8)-C(9)-C(10)-O(4)  | -179.87(17) |
| C(2)-C(1)-C(6)-O(2)     | 24.1(2)     | C(8)-C(9)-C(10)-C(6)  | -1.5(3)     |
| C(2)-C(1)-C(6)-C(10)    | -155.18(19) | C(10)-O(4)-C(11)-N(1) | 179.2(2)    |

|                           |             |                            |       |
|---------------------------|-------------|----------------------------|-------|
| C(10)-O(4)-C(11)-N(1A)    | -177.2(4)   | C(14A)-N(2A)-C(16A)-N(3A)  | -2(3) |
| C(10)-O(4)-C(11)-C(12)    | 2.8(3)      | C(15A)-N(3A)-C(16A)-N(2A)  | 7(4)  |
| C(11)-O(4)-C(10)-C(6)     | 19.2(3)     | C(16A)-N(2A)-C(14A)-C(15A) | -3(2) |
| C(11)-O(4)-C(10)-C(9)     | -162.41(18) | C(16A)-N(3A)-C(15A)-C(14A) | -9(3) |
| C(12)-C(1)-C(2)-C(3)      | 71.4(2)     | N(5)-C(17)-C(18)-N(4)      | 1(6)  |
| C(12)-C(1)-C(5)-C(4)      | -71.4(2)    | C(17)-N(5)-C(19)-N(4)      | 3(4)  |
| C(12)-C(1)-C(6)-O(2)      | 144.10(17)  | C(18)-N(4)-C(19)-N(5)      | -2(3) |
| C(12)-C(1)-C(6)-C(10)     | -35.2(3)    | C(19)-N(4)-C(18)-C(17)     | 0(5)  |
| C(13)-C(7)-C(8)-C(9)      | -176.4(2)   | C(19)-N(5)-C(17)-C(18)     | -2(5) |
| N(2)-C(14)-C(15)-N(3)     | -5(2)       | N(5A)-C(17A)-C(18A)-N(4A)  | -2(6) |
| C(14)-N(2)-C(16)-N(3)     | 2.9(18)     | C(17A)-N(5A)-C(19A)-N(4A)  | 2(3)  |
| C(15)-N(3)-C(16)-N(2)     | -6(2)       | C(18A)-N(4A)-C(19A)-N(5A)  | -3(4) |
| C(16)-N(2)-C(14)-C(15)    | 1.2(15)     | C(19A)-N(4A)-C(18A)-C(17A) | 3(5)  |
| C(16)-N(3)-C(15)-C(14)    | 6(2)        | C(19A)-N(5A)-C(17A)-C(18A) | 0(5)  |
| N(2A)-C(14A)-C(15A)-N(3A) | 8(3)        |                            |       |

**Table S35.** Hydrogen bonds for **18b** [ $\text{\AA}$  and  $^\circ$ ].

| D-H...A             | d(D-H)  | d(H...A) | d(D...A) | $\angle(\text{DHA})$ |
|---------------------|---------|----------|----------|----------------------|
| N(5)-H(5D)...N(5)#1 | 0.80(5) | 1.83(5)  | 2.63(4)  | 174(5)               |

Symmetry transformations used to generate equivalent atoms:

#1  $-x+1/2, y, -z+1$

## 8.6 Intermediate 14a

X-ray diffraction data were collected at 100K on a four-circle Rigaku Synergy S diffractometer equipped with a HyPix6000HE area-detector (kappa geometry, shutterless  $\omega$ -scan technique), using monochromatized Cu K $\alpha$ -radiation. The intensity data were integrated and corrected for absorption and decay by the CrysAlisPro program.<sup>6</sup> The structure was solved by direct methods using SHELXT<sup>4</sup> and refined on  $F^2$  using SHELXL-2018<sup>5</sup> in the OLEX2 program.<sup>7</sup> All non-hydrogen atoms were refined with individual anisotropic displacement parameters. Location of amino hydrogen atom (H2) was found from the electron density-difference map; this hydrogen atom was refined with individual isotropic displacement parameters. All other hydrogen atoms were placed in ideal calculated positions and refined as riding atoms with relative isotropic displacement parameters.

**Table S36.** Crystal data and structure refinement for **14a**.

|                                 |                                        |                                |
|---------------------------------|----------------------------------------|--------------------------------|
| Identification code             | <b>14a</b>                             |                                |
| Empirical formula               | C30 H32 N4 O6                          |                                |
| Formula weight                  | 544.59                                 |                                |
| Temperature                     | 100.0(2) K                             |                                |
| Wavelength                      | 1.54184 Å                              |                                |
| Crystal system                  | Monoclinic                             |                                |
| Space group                     | P 2 <sub>1</sub> /n                    |                                |
| Unit cell dimensions            | a = 19.3210(2) Å                       | $\alpha = 90^\circ$ .          |
|                                 | b = 7.16745(8) Å                       | $\beta = 110.0334(14)^\circ$ . |
|                                 | c = 20.9490(3) Å                       | $\gamma = 90^\circ$ .          |
| Volume                          | 2725.53(6) Å <sup>3</sup>              |                                |
| Z                               | 4                                      |                                |
| Density (calculated)            | 1.327 g/cm <sup>3</sup>                |                                |
| Absorption coefficient          | 0.768 mm <sup>-1</sup>                 |                                |
| F(000)                          | 1152                                   |                                |
| Crystal size                    | 0.16 x 0.04 x 0.02 mm <sup>3</sup>     |                                |
| Theta range for data collection | 2.687 to 77.833°.                      |                                |
| Index ranges                    | -24 ≤ h ≤ 24, -7 ≤ k ≤ 9, -26 ≤ l ≤ 26 |                                |
| Reflections collected           | 33634                                  |                                |

|                                   |                                             |
|-----------------------------------|---------------------------------------------|
| Independent reflections           | 5757 [R(int) = 0.0450]                      |
| Observed reflections              | 4980                                        |
| Completeness to theta = 67.684°   | 100.0 %                                     |
| Absorption correction             | Semi-empirical from equivalents             |
| Max. and min. transmission        | 1.00000 and 0.66569                         |
| Refinement method                 | Full-matrix least-squares on F <sup>2</sup> |
| Data / restraints / parameters    | 5757 / 0 / 367                              |
| Goodness-of-fit on F <sup>2</sup> | 1.054                                       |
| Final R indices [I > 2sigma(I)]   | R1 = 0.0413, wR2 = 0.1061                   |
| R indices (all data)              | R1 = 0.0481, wR2 = 0.1108                   |
| Largest diff. peak and hole       | 0.416 and -0.241 e.Å <sup>-3</sup>          |
| CCDC                              | 2270309                                     |

**Table S37.** Atomic coordinates ( $\times 10^4$ ) and equivalent isotropic displacement parameters ( $\text{\AA}^2 \times 10^3$ ) for **14a**. U(eq) is defined as one third of the trace of the orthogonalized U<sup>ij</sup> tensor.

|      | x       | y       | z       | U(eq) |
|------|---------|---------|---------|-------|
| O(1) | 4830(1) | 2143(1) | 1949(1) | 18(1) |
| O(2) | 5931(1) | 942(1)  | 3934(1) | 25(1) |
| O(3) | 4623(1) | 2702(1) | 3606(1) | 18(1) |
| O(4) | 4349(1) | 51(1)   | 4067(1) | 26(1) |
| O(5) | 4450(1) | 7826(1) | 2327(1) | 26(1) |
| O(6) | 2198(1) | 1690(2) | 1678(1) | 26(1) |
| N(1) | 4806(1) | 4796(2) | 2617(1) | 17(1) |
| N(2) | 5514(1) | 5120(2) | 3075(1) | 18(1) |
| N(3) | 4252(1) | 2947(2) | 4501(1) | 20(1) |
| N(4) | 4095(1) | 3851(2) | 5452(1) | 28(1) |
| C(1) | 4542(1) | 2920(2) | 2448(1) | 16(1) |
| C(2) | 4777(1) | 1672(2) | 3082(1) | 17(1) |
| C(3) | 5596(1) | 1156(2) | 3326(1) | 20(1) |
| C(4) | 5889(1) | 829(2)  | 2791(1) | 22(1) |
| C(5) | 5496(1) | 1273(2) | 2145(1) | 20(1) |

|       |         |         |         |       |
|-------|---------|---------|---------|-------|
| C(6)  | 5715(1) | 864(2)  | 1544(1) | 26(1) |
| C(7)  | 4411(1) | 1713(2) | 4048(1) | 20(1) |
| C(8)  | 4204(1) | 2415(2) | 5117(1) | 25(1) |
| C(9)  | 4065(1) | 5397(2) | 5041(1) | 25(1) |
| C(10) | 4169(1) | 4879(2) | 4460(1) | 22(1) |
| C(11) | 4332(1) | 6161(2) | 2258(1) | 19(1) |
| C(12) | 3671(1) | 5169(2) | 1773(1) | 20(1) |
| C(13) | 3697(1) | 3184(2) | 2063(1) | 17(1) |
| C(14) | 3247(1) | 3119(2) | 2544(1) | 20(1) |
| C(15) | 2422(1) | 3193(2) | 2147(1) | 24(1) |
| C(16) | 2557(1) | 1829(2) | 1189(1) | 25(1) |
| C(17) | 3390(1) | 1681(2) | 1512(1) | 21(1) |
| C(18) | 6058(1) | 5772(2) | 2829(1) | 18(1) |
| C(19) | 5986(1) | 5731(2) | 2144(1) | 21(1) |
| C(20) | 6562(1) | 6339(2) | 1942(1) | 25(1) |
| C(21) | 7211(1) | 7015(2) | 2413(1) | 26(1) |
| C(22) | 7281(1) | 7042(2) | 3096(1) | 24(1) |
| C(23) | 6715(1) | 6418(2) | 3306(1) | 21(1) |
| C(24) | 2705(1) | 5676(3) | -195(1) | 35(1) |
| C(25) | 3017(1) | 7372(3) | 74(1)   | 40(1) |
| C(26) | 3773(1) | 7593(3) | 312(1)  | 44(1) |
| C(27) | 4215(1) | 6099(3) | 286(1)  | 46(1) |
| C(28) | 3907(1) | 4399(3) | 26(1)   | 39(1) |
| C(29) | 3136(1) | 4167(2) | -225(1) | 33(1) |
| C(30) | 2783(1) | 2360(3) | -521(1) | 42(1) |

**Table S38.** Bond lengths [ $\text{\AA}$ ] and angles [ $^\circ$ ] for **14a**.

|            |            |            |            |
|------------|------------|------------|------------|
| O(1)-C(1)  | 1.4528(15) | O(6)-C(15) | 1.4227(17) |
| O(1)-C(5)  | 1.3601(16) | O(6)-C(16) | 1.4240(18) |
| O(2)-C(3)  | 1.2252(17) | N(1)-N(2)  | 1.3967(14) |
| O(3)-C(2)  | 1.4364(15) | N(1)-C(1)  | 1.4382(16) |
| O(3)-C(7)  | 1.3362(16) | N(1)-C(11) | 1.3736(17) |
| O(4)-C(7)  | 1.1994(18) | N(2)-H(2)  | 0.87(2)    |
| O(5)-C(11) | 1.2139(17) | N(2)-C(18) | 1.3994(17) |

|              |            |                  |            |
|--------------|------------|------------------|------------|
| N(3)-C(7)    | 1.4069(18) | C(19)-H(19)      | 0.9500     |
| N(3)-C(8)    | 1.3777(18) | C(19)-C(20)      | 1.390(2)   |
| N(3)-C(10)   | 1.3936(19) | C(20)-H(20)      | 0.9500     |
| N(4)-C(8)    | 1.303(2)   | C(20)-C(21)      | 1.390(2)   |
| N(4)-C(9)    | 1.392(2)   | C(21)-H(21)      | 0.9500     |
| C(1)-C(2)    | 1.5342(17) | C(21)-C(22)      | 1.390(2)   |
| C(1)-C(13)   | 1.5668(17) | C(22)-H(22)      | 0.9500     |
| C(2)-H(2A)   | 1.0000     | C(22)-C(23)      | 1.384(2)   |
| C(2)-C(3)    | 1.5328(18) | C(23)-H(23)      | 0.9500     |
| C(3)-C(4)    | 1.436(2)   | C(24)-H(24)      | 0.9500     |
| C(4)-H(4)    | 0.9500     | C(24)-C(25)      | 1.387(3)   |
| C(4)-C(5)    | 1.3429(19) | C(24)-C(29)      | 1.379(3)   |
| C(5)-C(6)    | 1.4880(19) | C(25)-H(25)      | 0.9500     |
| C(6)-H(6A)   | 0.9800     | C(25)-C(26)      | 1.383(3)   |
| C(6)-H(6B)   | 0.9800     | C(26)-H(26)      | 0.9500     |
| C(6)-H(6C)   | 0.9800     | C(26)-C(27)      | 1.381(3)   |
| C(8)-H(8)    | 0.9500     | C(27)-H(27)      | 0.9500     |
| C(9)-H(9)    | 0.9500     | C(27)-C(28)      | 1.383(3)   |
| C(9)-C(10)   | 1.351(2)   | C(28)-H(28)      | 0.9500     |
| C(10)-H(10)  | 0.9500     | C(28)-C(29)      | 1.409(2)   |
| C(11)-C(12)  | 1.5109(18) | C(29)-C(30)      | 1.496(3)   |
| C(12)-H(12A) | 0.9900     | C(30)-H(30A)     | 0.9800     |
| C(12)-H(12B) | 0.9900     | C(30)-H(30B)     | 0.9800     |
| C(12)-C(13)  | 1.5404(18) | C(30)-H(30C)     | 0.9800     |
| C(13)-C(14)  | 1.5408(18) | C(5)-O(1)-C(1)   | 120.93(10) |
| C(13)-C(17)  | 1.5412(18) | C(7)-O(3)-C(2)   | 116.73(10) |
| C(14)-H(14A) | 0.9900     | C(15)-O(6)-C(16) | 109.72(11) |
| C(14)-H(14B) | 0.9900     | N(2)-N(1)-C(1)   | 120.31(10) |
| C(14)-C(15)  | 1.5260(18) | C(11)-N(1)-N(2)  | 124.75(11) |
| C(15)-H(15A) | 0.9900     | C(11)-N(1)-C(1)  | 114.77(10) |
| C(15)-H(15B) | 0.9900     | N(1)-N(2)-H(2)   | 114.7(13)  |
| C(16)-H(16A) | 0.9900     | N(1)-N(2)-C(18)  | 118.97(10) |
| C(16)-H(16B) | 0.9900     | C(18)-N(2)-H(2)  | 115.3(13)  |
| C(16)-C(17)  | 1.5210(18) | C(8)-N(3)-C(7)   | 123.97(12) |
| C(17)-H(17A) | 0.9900     | C(8)-N(3)-C(10)  | 106.85(12) |
| C(17)-H(17B) | 0.9900     | C(10)-N(3)-C(7)  | 129.02(12) |
| C(18)-C(19)  | 1.3948(18) | C(8)-N(4)-C(9)   | 105.99(12) |
| C(18)-C(23)  | 1.3988(18) | O(1)-C(1)-C(2)   | 109.07(10) |

|                  |            |                     |            |
|------------------|------------|---------------------|------------|
| O(1)-C(1)-C(13)  | 105.30(9)  | O(5)-C(11)-N(1)     | 125.00(12) |
| N(1)-C(1)-O(1)   | 110.13(10) | O(5)-C(11)-C(12)    | 128.51(12) |
| N(1)-C(1)-C(2)   | 111.00(10) | N(1)-C(11)-C(12)    | 106.48(11) |
| N(1)-C(1)-C(13)  | 103.41(10) | C(11)-C(12)-H(12A)  | 110.7      |
| C(2)-C(1)-C(13)  | 117.61(10) | C(11)-C(12)-H(12B)  | 110.7      |
| O(3)-C(2)-C(1)   | 106.54(10) | C(11)-C(12)-C(13)   | 105.30(10) |
| O(3)-C(2)-H(2A)  | 109.2      | H(12A)-C(12)-H(12B) | 108.8      |
| O(3)-C(2)-C(3)   | 109.27(10) | C(13)-C(12)-H(12A)  | 110.7      |
| C(1)-C(2)-H(2A)  | 109.2      | C(13)-C(12)-H(12B)  | 110.7      |
| C(3)-C(2)-C(1)   | 113.22(11) | C(12)-C(13)-C(1)    | 101.67(10) |
| C(3)-C(2)-H(2A)  | 109.2      | C(12)-C(13)-C(14)   | 109.64(11) |
| O(2)-C(3)-C(2)   | 119.56(12) | C(12)-C(13)-C(17)   | 113.48(11) |
| O(2)-C(3)-C(4)   | 125.63(13) | C(14)-C(13)-C(1)    | 112.41(10) |
| C(4)-C(3)-C(2)   | 114.63(11) | C(14)-C(13)-C(17)   | 108.11(11) |
| C(3)-C(4)-H(4)   | 119.7      | C(17)-C(13)-C(1)    | 111.51(10) |
| C(5)-C(4)-C(3)   | 120.61(12) | C(13)-C(14)-H(14A)  | 109.4      |
| C(5)-C(4)-H(4)   | 119.7      | C(13)-C(14)-H(14B)  | 109.4      |
| O(1)-C(5)-C(6)   | 110.43(11) | H(14A)-C(14)-H(14B) | 108.0      |
| C(4)-C(5)-O(1)   | 124.23(12) | C(15)-C(14)-C(13)   | 111.15(11) |
| C(4)-C(5)-C(6)   | 125.33(13) | C(15)-C(14)-H(14A)  | 109.4      |
| C(5)-C(6)-H(6A)  | 109.5      | C(15)-C(14)-H(14B)  | 109.4      |
| C(5)-C(6)-H(6B)  | 109.5      | O(6)-C(15)-C(14)    | 111.28(11) |
| C(5)-C(6)-H(6C)  | 109.5      | O(6)-C(15)-H(15A)   | 109.4      |
| H(6A)-C(6)-H(6B) | 109.5      | O(6)-C(15)-H(15B)   | 109.4      |
| H(6A)-C(6)-H(6C) | 109.5      | C(14)-C(15)-H(15A)  | 109.4      |
| H(6B)-C(6)-H(6C) | 109.5      | C(14)-C(15)-H(15B)  | 109.4      |
| O(3)-C(7)-N(3)   | 108.92(11) | H(15A)-C(15)-H(15B) | 108.0      |
| O(4)-C(7)-O(3)   | 127.45(13) | O(6)-C(16)-H(16A)   | 109.2      |
| O(4)-C(7)-N(3)   | 123.62(13) | O(6)-C(16)-H(16B)   | 109.2      |
| N(3)-C(8)-H(8)   | 124.4      | O(6)-C(16)-C(17)    | 112.12(11) |
| N(4)-C(8)-N(3)   | 111.16(13) | H(16A)-C(16)-H(16B) | 107.9      |
| N(4)-C(8)-H(8)   | 124.4      | C(17)-C(16)-H(16A)  | 109.2      |
| N(4)-C(9)-H(9)   | 124.7      | C(17)-C(16)-H(16B)  | 109.2      |
| C(10)-C(9)-N(4)  | 110.55(13) | C(13)-C(17)-H(17A)  | 109.4      |
| C(10)-C(9)-H(9)  | 124.7      | C(13)-C(17)-H(17B)  | 109.4      |
| N(3)-C(10)-H(10) | 127.3      | C(16)-C(17)-C(13)   | 111.16(11) |
| C(9)-C(10)-N(3)  | 105.44(13) | C(16)-C(17)-H(17A)  | 109.4      |
| C(9)-C(10)-H(10) | 127.3      | C(16)-C(17)-H(17B)  | 109.4      |

|                     |            |                     |            |
|---------------------|------------|---------------------|------------|
| H(17A)-C(17)-H(17B) | 108.0      | C(24)-C(25)-H(25)   | 119.9      |
| C(19)-C(18)-N(2)    | 123.33(12) | C(26)-C(25)-C(24)   | 120.30(18) |
| C(19)-C(18)-C(23)   | 119.23(12) | C(26)-C(25)-H(25)   | 119.9      |
| C(23)-C(18)-N(2)    | 117.38(12) | C(25)-C(26)-H(26)   | 120.4      |
| C(18)-C(19)-H(19)   | 120.1      | C(27)-C(26)-C(25)   | 119.20(18) |
| C(20)-C(19)-C(18)   | 119.87(13) | C(27)-C(26)-H(26)   | 120.4      |
| C(20)-C(19)-H(19)   | 120.1      | C(26)-C(27)-H(27)   | 119.6      |
| C(19)-C(20)-H(20)   | 119.5      | C(26)-C(27)-C(28)   | 120.71(17) |
| C(19)-C(20)-C(21)   | 121.02(13) | C(28)-C(27)-H(27)   | 119.6      |
| C(21)-C(20)-H(20)   | 119.5      | C(27)-C(28)-H(28)   | 119.8      |
| C(20)-C(21)-H(21)   | 120.6      | C(27)-C(28)-C(29)   | 120.48(18) |
| C(20)-C(21)-C(22)   | 118.81(13) | C(29)-C(28)-H(28)   | 119.8      |
| C(22)-C(21)-H(21)   | 120.6      | C(24)-C(29)-C(28)   | 117.92(16) |
| C(21)-C(22)-H(22)   | 119.6      | C(24)-C(29)-C(30)   | 120.08(16) |
| C(23)-C(22)-C(21)   | 120.83(13) | C(28)-C(29)-C(30)   | 122.00(17) |
| C(23)-C(22)-H(22)   | 119.6      | C(29)-C(30)-H(30A)  | 109.5      |
| C(18)-C(23)-H(23)   | 119.9      | C(29)-C(30)-H(30B)  | 109.5      |
| C(22)-C(23)-C(18)   | 120.22(13) | C(29)-C(30)-H(30C)  | 109.5      |
| C(22)-C(23)-H(23)   | 119.9      | H(30A)-C(30)-H(30B) | 109.5      |
| C(25)-C(24)-H(24)   | 119.3      | H(30A)-C(30)-H(30C) | 109.5      |
| C(29)-C(24)-H(24)   | 119.3      | H(30B)-C(30)-H(30C) | 109.5      |
| C(29)-C(24)-C(25)   | 121.39(16) |                     |            |

**Table S39.** Anisotropic displacement parameters ( $\text{\AA}^2 \times 10^3$ ) for **14a**. The anisotropic displacement factor exponent takes the form:  $-2 \square^2 [h^2 a^*2U^{11} + \dots + 2 h k a^* b^* U^{12}]$

|      | U <sup>11</sup> | U <sup>22</sup> | U <sup>33</sup> | U <sup>23</sup> | U <sup>13</sup> | U <sup>12</sup> |
|------|-----------------|-----------------|-----------------|-----------------|-----------------|-----------------|
| O(1) | 18(1)           | 21(1)           | 17(1)           | -2(1)           | 6(1)            | 2(1)            |
| O(2) | 23(1)           | 27(1)           | 22(1)           | 5(1)            | 4(1)            | 2(1)            |
| O(3) | 21(1)           | 19(1)           | 16(1)           | 1(1)            | 7(1)            | -1(1)           |
| O(4) | 33(1)           | 22(1)           | 26(1)           | 2(1)            | 12(1)           | -3(1)           |
| O(5) | 29(1)           | 16(1)           | 31(1)           | 0(1)            | 6(1)            | 0(1)            |
| O(6) | 19(1)           | 31(1)           | 26(1)           | -3(1)           | 6(1)            | -6(1)           |



|       |       |       |       |       |       |        |
|-------|-------|-------|-------|-------|-------|--------|
| N(1)  | 15(1) | 16(1) | 17(1) | 0(1)  | 3(1)  | -2(1)  |
| N(2)  | 16(1) | 22(1) | 14(1) | -2(1) | 3(1)  | -4(1)  |
| N(3)  | 19(1) | 25(1) | 16(1) | 1(1)  | 6(1)  | 1(1)   |
| N(4)  | 26(1) | 38(1) | 21(1) | -2(1) | 9(1)  | 0(1)   |
| C(1)  | 17(1) | 17(1) | 16(1) | -2(1) | 7(1)  | -1(1)  |
| C(2)  | 18(1) | 17(1) | 17(1) | -1(1) | 7(1)  | 0(1)   |
| C(3)  | 20(1) | 16(1) | 22(1) | 4(1)  | 5(1)  | -1(1)  |
| C(4)  | 18(1) | 20(1) | 26(1) | 1(1)  | 7(1)  | 2(1)   |
| C(5)  | 17(1) | 17(1) | 26(1) | -2(1) | 8(1)  | -2(1)  |
| C(6)  | 25(1) | 30(1) | 26(1) | -4(1) | 12(1) | 2(1)   |
| C(7)  | 17(1) | 24(1) | 17(1) | 2(1)  | 4(1)  | 0(1)   |
| C(8)  | 25(1) | 32(1) | 19(1) | 2(1)  | 8(1)  | -2(1)  |
| C(9)  | 18(1) | 33(1) | 22(1) | -4(1) | 3(1)  | 3(1)   |
| C(10) | 18(1) | 25(1) | 20(1) | 0(1)  | 3(1)  | 2(1)   |
| C(11) | 21(1) | 18(1) | 19(1) | 1(1)  | 7(1)  | 0(1)   |
| C(12) | 18(1) | 21(1) | 20(1) | 2(1)  | 4(1)  | 1(1)   |
| C(13) | 16(1) | 18(1) | 17(1) | 0(1)  | 4(1)  | 0(1)   |
| C(14) | 18(1) | 24(1) | 19(1) | -1(1) | 6(1)  | 0(1)   |
| C(15) | 18(1) | 29(1) | 25(1) | -2(1) | 7(1)  | -1(1)  |
| C(16) | 20(1) | 31(1) | 21(1) | -3(1) | 4(1)  | -4(1)  |
| C(17) | 19(1) | 21(1) | 20(1) | -3(1) | 4(1)  | -2(1)  |
| C(18) | 18(1) | 16(1) | 20(1) | 0(1)  | 6(1)  | 1(1)   |
| C(19) | 22(1) | 22(1) | 19(1) | -1(1) | 6(1)  | -2(1)  |
| C(20) | 28(1) | 26(1) | 24(1) | 2(1)  | 12(1) | 1(1)   |
| C(21) | 22(1) | 25(1) | 35(1) | 1(1)  | 15(1) | -1(1)  |
| C(22) | 17(1) | 24(1) | 30(1) | -2(1) | 7(1)  | -1(1)  |
| C(23) | 19(1) | 21(1) | 21(1) | -1(1) | 4(1)  | 1(1)   |
| C(24) | 33(1) | 38(1) | 29(1) | 9(1)  | 4(1)  | 1(1)   |
| C(25) | 46(1) | 34(1) | 35(1) | 7(1)  | 6(1)  | 2(1)   |
| C(26) | 52(1) | 42(1) | 34(1) | 2(1)  | 12(1) | -14(1) |
| C(27) | 35(1) | 71(1) | 34(1) | 4(1)  | 13(1) | -12(1) |
| C(28) | 40(1) | 51(1) | 31(1) | 5(1)  | 18(1) | 5(1)   |
| C(29) | 40(1) | 39(1) | 24(1) | 5(1)  | 14(1) | -2(1)  |
| C(30) | 54(1) | 39(1) | 36(1) | -1(1) | 22(1) | -4(1)  |

---

**Table S40.** Hydrogen coordinates ( $\times 10^4$ ) and isotropic displacement parameters ( $\text{\AA}^2 \times 10^3$ ) for **14a**.

|        | x        | y        | z        | U(eq) |
|--------|----------|----------|----------|-------|
| H(2)   | 5530(10) | 5580(30) | 3466(10) | 32(5) |
| H(2A)  | 4475     | 505      | 2983     | 20    |
| H(4)   | 6364     | 293      | 2895     | 26    |
| H(6A)  | 5363     | -12      | 1244     | 39    |
| H(6B)  | 6209     | 310      | 1696     | 39    |
| H(6C)  | 5718     | 2024     | 1298     | 39    |
| H(8)   | 4245     | 1165     | 5276     | 30    |
| H(9)   | 3982     | 6642     | 5153     | 30    |
| H(10)  | 4183     | 5666     | 4100     | 26    |
| H(12A) | 3700     | 5128     | 1311     | 24    |
| H(12B) | 3209     | 5809     | 1752     | 24    |
| H(14A) | 3364     | 1957     | 2815     | 24    |
| H(14B) | 3386     | 4188     | 2862     | 24    |
| H(15A) | 2147     | 3135     | 2468     | 29    |
| H(15B) | 2300     | 4391     | 1898     | 29    |
| H(16A) | 2430     | 3039     | 949      | 29    |
| H(16B) | 2376     | 823      | 848      | 29    |
| H(17A) | 3618     | 1828     | 1157     | 25    |
| H(17B) | 3522     | 429      | 1718     | 25    |
| H(19)  | 5543     | 5288     | 1815     | 26    |
| H(20)  | 6512     | 6292     | 1475     | 30    |
| H(21)  | 7600     | 7451     | 2271     | 31    |
| H(22)  | 7723     | 7494     | 3424     | 29    |
| H(23)  | 6774     | 6429     | 3775     | 25    |
| H(24)  | 2184     | 5551     | -362     | 42    |
| H(25)  | 2708     | 8386     | 95       | 48    |
| H(26)  | 3987     | 8758     | 491      | 52    |
| H(27)  | 4735     | 6241     | 449      | 55    |
| H(28)  | 4218     | 3380     | 16       | 47    |
| H(30A) | 2486     | 1894     | -259     | 62    |
| H(30B) | 3166     | 1446     | -505     | 62    |
| H(30C) | 2467     | 2556     | -994     | 62    |

**Table S41.** Torsion angles [°] for **14a**.

|                        |             |                         |             |
|------------------------|-------------|-------------------------|-------------|
| O(1)-C(1)-C(2)-O(3)    | 167.55(9)   | C(2)-O(3)-C(7)-N(3)     | -177.23(10) |
| O(1)-C(1)-C(2)-C(3)    | 47.43(14)   | C(2)-C(1)-C(13)-C(12)   | 149.17(11)  |
| O(1)-C(1)-C(13)-C(12)  | -89.14(11)  | C(2)-C(1)-C(13)-C(14)   | 32.01(15)   |
| O(1)-C(1)-C(13)-C(14)  | 153.70(10)  | C(2)-C(1)-C(13)-C(17)   | -89.58(13)  |
| O(1)-C(1)-C(13)-C(17)  | 32.10(14)   | C(2)-C(3)-C(4)-C(5)     | 11.00(19)   |
| O(2)-C(3)-C(4)-C(5)    | -173.76(14) | C(3)-C(4)-C(5)-O(1)     | 4.0(2)      |
| O(3)-C(2)-C(3)-O(2)    | 28.68(17)   | C(3)-C(4)-C(5)-C(6)     | -174.89(13) |
| O(3)-C(2)-C(3)-C(4)    | -155.77(11) | C(5)-O(1)-C(1)-N(1)     | 87.11(13)   |
| O(5)-C(11)-C(12)-C(13) | -161.88(14) | C(5)-O(1)-C(1)-C(2)     | -34.94(15)  |
| O(6)-C(16)-C(17)-C(13) | -57.12(15)  | C(5)-O(1)-C(1)-C(13)    | -162.02(11) |
| N(1)-N(2)-C(18)-C(19)  | -14.79(19)  | C(7)-O(3)-C(2)-C(1)     | 146.02(10)  |
| N(1)-N(2)-C(18)-C(23)  | 168.04(12)  | C(7)-O(3)-C(2)-C(3)     | -91.33(12)  |
| N(1)-C(1)-C(2)-O(3)    | 46.04(13)   | C(7)-N(3)-C(8)-N(4)     | 176.08(12)  |
| N(1)-C(1)-C(2)-C(3)    | -74.09(13)  | C(7)-N(3)-C(10)-C(9)    | -176.40(12) |
| N(1)-C(1)-C(13)-C(12)  | 26.46(12)   | C(8)-N(3)-C(7)-O(3)     | -162.53(12) |
| N(1)-C(1)-C(13)-C(14)  | -90.70(12)  | C(8)-N(3)-C(7)-O(4)     | 18.5(2)     |
| N(1)-C(1)-C(13)-C(17)  | 147.70(11)  | C(8)-N(3)-C(10)-C(9)    | -0.94(14)   |
| N(1)-C(11)-C(12)-C(13) | 19.18(14)   | C(8)-N(4)-C(9)-C(10)    | -1.03(16)   |
| N(2)-N(1)-C(1)-O(1)    | -79.95(13)  | C(9)-N(4)-C(8)-N(3)     | 0.40(16)    |
| N(2)-N(1)-C(1)-C(2)    | 40.94(15)   | C(10)-N(3)-C(7)-O(3)    | 12.23(18)   |
| N(2)-N(1)-C(1)-C(13)   | 167.95(10)  | C(10)-N(3)-C(7)-O(4)    | -166.77(13) |
| N(2)-N(1)-C(11)-O(5)   | -5.1(2)     | C(10)-N(3)-C(8)-N(4)    | 0.34(16)    |
| N(2)-N(1)-C(11)-C(12)  | 173.90(11)  | C(11)-N(1)-N(2)-C(18)   | -67.72(17)  |
| N(2)-C(18)-C(19)-C(20) | -177.50(13) | C(11)-N(1)-C(1)-O(1)    | 95.57(12)   |
| N(2)-C(18)-C(23)-C(22) | 178.50(13)  | C(11)-N(1)-C(1)-C(2)    | -143.54(11) |
| N(4)-C(9)-C(10)-N(3)   | 1.21(15)    | C(11)-N(1)-C(1)-C(13)   | -16.54(14)  |
| C(1)-O(1)-C(5)-C(4)    | 9.56(19)    | C(11)-C(12)-C(13)-C(1)  | -27.74(13)  |
| C(1)-O(1)-C(5)-C(6)    | -171.40(11) | C(11)-C(12)-C(13)-C(14) | 91.41(12)   |
| C(1)-N(1)-N(2)-C(18)   | 107.32(14)  | C(11)-C(12)-C(13)-C(17) | -147.60(11) |
| C(1)-N(1)-C(11)-O(5)   | 179.63(13)  | C(12)-C(13)-C(14)-C(15) | 73.14(14)   |
| C(1)-N(1)-C(11)-C(12)  | -1.38(15)   | C(12)-C(13)-C(17)-C(16) | -71.58(15)  |
| C(1)-C(2)-C(3)-O(2)    | 147.24(12)  | C(13)-C(1)-C(2)-O(3)    | -72.72(13)  |
| C(1)-C(2)-C(3)-C(4)    | -37.21(16)  | C(13)-C(1)-C(2)-C(3)    | 167.15(11)  |
| C(1)-C(13)-C(14)-C(15) | -174.55(11) | C(13)-C(14)-C(15)-O(6)  | 58.42(15)   |
| C(1)-C(13)-C(17)-C(16) | 174.32(11)  | C(14)-C(13)-C(17)-C(16) | 50.26(14)   |
| C(2)-O(3)-C(7)-O(4)    | 1.73(19)    | C(15)-O(6)-C(16)-C(17)  | 62.27(15)   |

|                         |            |                         |             |
|-------------------------|------------|-------------------------|-------------|
| C(16)-O(6)-C(15)-C(14)  | -62.61(14) | C(24)-C(25)-C(26)-C(27) | -0.8(3)     |
| C(17)-C(13)-C(14)-C(15) | -51.04(14) | C(25)-C(24)-C(29)-C(28) | -0.1(2)     |
| C(18)-C(19)-C(20)-C(21) | -0.8(2)    | C(25)-C(24)-C(29)-C(30) | -179.71(15) |
| C(19)-C(18)-C(23)-C(22) | 1.2(2)     | C(25)-C(26)-C(27)-C(28) | 0.0(3)      |
| C(19)-C(20)-C(21)-C(22) | 1.2(2)     | C(26)-C(27)-C(28)-C(29) | 0.8(3)      |
| C(20)-C(21)-C(22)-C(23) | -0.4(2)    | C(27)-C(28)-C(29)-C(24) | -0.7(2)     |
| C(21)-C(22)-C(23)-C(18) | -0.8(2)    | C(27)-C(28)-C(29)-C(30) | 178.89(16)  |
| C(23)-C(18)-C(19)-C(20) | -0.4(2)    | C(29)-C(24)-C(25)-C(26) | 0.9(3)      |

---

## 8.7 Compound 19

X-ray diffraction data were collected at 100K on a four-circle Rigaku Synergy S diffractometer equipped with a HyPix6000HE area-detector (kappa geometry, shutterless  $\omega$ -scan technique), using graphite monochromatized Cu K $_{\alpha}$ -radiation. The intensity data were integrated and corrected for absorption and decay by the CrysAlisPro program.<sup>6</sup> The structure was solved by direct methods using SHELXT<sup>4</sup> and refined on  $F^2$  using SHELXL-2018<sup>5</sup> in the OLEX2 program.<sup>7</sup> All non-hydrogen atoms were refined with individual anisotropic displacement parameters. Locations of amino hydrogen atoms (H1A, H1B, H2A and H2B) were found from the electron density-difference map; these hydrogen atoms were refined with individual isotropic displacement parameters. All other hydrogen atoms were placed in ideal calculated positions and refined as riding atoms with relative isotropic displacement parameters.

**Table S42.** Crystal data and structure refinement for **19**.

---

|                                   |                                                               |                    |
|-----------------------------------|---------------------------------------------------------------|--------------------|
| Identification code               | <b>19</b>                                                     |                    |
| Empirical formula                 | C <sub>19</sub> H <sub>20</sub> N <sub>2</sub> O <sub>4</sub> |                    |
| Formula weight                    | 340.37                                                        |                    |
| Temperature                       | 100.00(10) K                                                  |                    |
| Wavelength                        | 1.54184 Å                                                     |                    |
| Crystal system                    | Monoclinic                                                    |                    |
| Space group                       | P2 <sub>1</sub> /c                                            |                    |
| Unit cell dimensions              | a = 9.80840(10) Å                                             | a = 90°.           |
|                                   | b = 14.35350(10) Å                                            | b = 108.4030(10)°. |
|                                   | c = 12.24630(10) Å                                            | g = 90°.           |
| Volume                            | 1635.92(3) Å <sup>3</sup>                                     |                    |
| Z                                 | 4                                                             |                    |
| Density (calculated)              | 1.382 Mg/m <sup>3</sup>                                       |                    |
| Absorption coefficient            | 0.803 mm <sup>-1</sup>                                        |                    |
| F(000)                            | 720                                                           |                    |
| Crystal size                      | 0.5 x 0.3 x 0.2 mm <sup>3</sup>                               |                    |
| Theta range for data collection   | 4.751 to 77.731°.                                             |                    |
| Index ranges                      | -12 ≤ h ≤ 11, -18 ≤ k ≤ 18, -15 ≤ l ≤ 15                      |                    |
| Reflections collected             | 41248                                                         |                    |
| Independent reflections           | 3480 [R(int) = 0.0322]                                        |                    |
| Completeness to theta = 67.684°   | 100.0 %                                                       |                    |
| Absorption correction             | Semi-empirical from equivalents                               |                    |
| Max. and min. transmission        | 1.00000 and 0.69322                                           |                    |
| Refinement method                 | Full-matrix least-squares on F <sup>2</sup>                   |                    |
| Data / restraints / parameters    | 3480 / 0 / 234                                                |                    |
| Goodness-of-fit on F <sup>2</sup> | 1.061                                                         |                    |
| Final R indices [I > 2σ(I)]       | R1 = 0.0369, wR2 = 0.0938                                     |                    |
| R indices (all data)              | R1 = 0.0377, wR2 = 0.0944                                     |                    |
| Largest diff. peak and hole       | 0.225 and -0.219 e.Å <sup>-3</sup>                            |                    |
| CCDC                              | 2270313                                                       |                    |

---

**Table S43.** Atomic coordinates ( $\times 10^4$ ) and equivalent isotropic displacement parameters ( $\text{\AA}^2 \times 10^3$ ) for **19**.  $U(\text{eq})$  is defined as one third of the trace of the orthogonalized  $U^{\text{ij}}$  tensor.

|       | x       | y       | z       | $U(\text{eq})$ |
|-------|---------|---------|---------|----------------|
| O(1)  | 875(1)  | 5959(1) | 4834(1) | 27(1)          |
| O(2)  | 5611(1) | 3570(1) | 7430(1) | 21(1)          |
| O(3)  | 5198(1) | 5749(1) | 8706(1) | 27(1)          |
| O(4)  | 7471(1) | 2865(1) | 8731(1) | 31(1)          |
| N(1)  | 2785(1) | 5316(1) | 6219(1) | 19(1)          |
| N(2)  | 2780(1) | 5995(1) | 7048(1) | 20(1)          |
| C(1)  | 1782(1) | 5355(1) | 5127(1) | 21(1)          |
| C(2)  | 2095(1) | 4552(1) | 4460(1) | 24(1)          |
| C(3)  | 3251(1) | 3947(1) | 5323(1) | 18(1)          |
| C(4)  | 3733(1) | 4565(1) | 6402(1) | 18(1)          |
| C(5)  | 2594(1) | 3032(1) | 5592(1) | 23(1)          |
| C(6)  | 2095(1) | 2393(1) | 4534(1) | 28(1)          |
| C(7)  | 3294(1) | 2208(1) | 4011(1) | 27(1)          |
| C(8)  | 3931(1) | 3118(1) | 3746(1) | 23(1)          |
| C(9)  | 4480(1) | 3716(1) | 4833(1) | 21(1)          |
| C(10) | 4854(1) | 4408(1) | 7364(1) | 18(1)          |
| C(11) | 5546(1) | 4908(1) | 8437(1) | 21(1)          |
| C(12) | 6638(1) | 4380(1) | 9102(1) | 23(1)          |
| C(13) | 6689(1) | 3542(1) | 8492(1) | 23(1)          |
| C(14) | 1680(1) | 5867(1) | 7590(1) | 20(1)          |
| C(15) | 1293(1) | 6651(1) | 8094(1) | 24(1)          |
| C(16) | 290(1)  | 6562(1) | 8675(1) | 28(1)          |
| C(17) | -317(1) | 5702(1) | 8750(1) | 28(1)          |
| C(18) | 96(1)   | 4922(1) | 8262(1) | 25(1)          |
| C(19) | 1105(1) | 5000(1) | 7681(1) | 22(1)          |

**Table S44.** Bond lengths [Å] and angles [°] for **19**.

|             |            |                  |            |
|-------------|------------|------------------|------------|
| O(1)-C(1)   | 1.2113(14) | C(12)-C(13)      | 1.4262(16) |
| O(2)-C(10)  | 1.4019(13) | C(14)-C(15)      | 1.3929(16) |
| O(2)-C(13)  | 1.3938(14) | C(14)-C(19)      | 1.3855(16) |
| O(3)-H(3)   | 0.95(2)    | C(15)-H(15)      | 0.9500     |
| O(3)-C(11)  | 1.3241(14) | C(15)-C(16)      | 1.3902(17) |
| O(4)-C(13)  | 1.2142(15) | C(16)-H(16)      | 0.9500     |
| N(1)-N(2)   | 1.4078(13) | C(16)-C(17)      | 1.3852(19) |
| N(1)-C(1)   | 1.3886(15) | C(17)-H(17)      | 0.9500     |
| N(1)-C(4)   | 1.3949(14) | C(17)-C(18)      | 1.3891(18) |
| N(2)-H(2)   | 0.916(17)  | C(18)-H(18)      | 0.9500     |
| N(2)-C(14)  | 1.4458(14) | C(18)-C(19)      | 1.3940(16) |
| C(1)-C(2)   | 1.4997(16) | C(19)-H(19)      | 0.9500     |
| C(2)-H(2A)  | 0.9900     | C(13)-O(2)-C(10) | 108.12(9)  |
| C(2)-H(2B)  | 0.9900     | C(11)-O(3)-H(3)  | 106.5(13)  |
| C(2)-C(3)   | 1.5499(16) | C(1)-N(1)-N(2)   | 120.22(9)  |
| C(3)-C(4)   | 1.5373(15) | C(1)-N(1)-C(4)   | 114.86(9)  |
| C(3)-C(5)   | 1.5443(15) | C(4)-N(1)-N(2)   | 124.91(9)  |
| C(3)-C(9)   | 1.5423(15) | N(1)-N(2)-H(2)   | 108.2(10)  |
| C(4)-C(10)  | 1.3524(16) | N(1)-N(2)-C(14)  | 114.66(9)  |
| C(5)-H(5A)  | 0.9900     | C(14)-N(2)-H(2)  | 109.3(10)  |
| C(5)-H(5B)  | 0.9900     | O(1)-C(1)-N(1)   | 123.00(11) |
| C(5)-C(6)   | 1.5360(16) | O(1)-C(1)-C(2)   | 130.21(11) |
| C(6)-H(6A)  | 0.9900     | N(1)-C(1)-C(2)   | 106.77(9)  |
| C(6)-H(6B)  | 0.9900     | C(1)-C(2)-H(2A)  | 110.3      |
| C(6)-C(7)   | 1.5291(17) | C(1)-C(2)-H(2B)  | 110.3      |
| C(7)-H(7A)  | 0.9900     | C(1)-C(2)-C(3)   | 106.90(9)  |
| C(7)-H(7B)  | 0.9900     | H(2A)-C(2)-H(2B) | 108.6      |
| C(7)-C(8)   | 1.5259(16) | C(3)-C(2)-H(2A)  | 110.3      |
| C(8)-H(8A)  | 0.9900     | C(3)-C(2)-H(2B)  | 110.3      |
| C(8)-H(8B)  | 0.9900     | C(4)-C(3)-C(2)   | 102.90(9)  |
| C(8)-C(9)   | 1.5319(16) | C(4)-C(3)-C(5)   | 110.06(9)  |
| C(9)-H(9A)  | 0.9900     | C(4)-C(3)-C(9)   | 113.12(9)  |
| C(9)-H(9B)  | 0.9900     | C(5)-C(3)-C(2)   | 110.95(9)  |
| C(10)-C(11) | 1.4631(15) | C(9)-C(3)-C(2)   | 110.38(9)  |
| C(11)-C(12) | 1.3538(17) | C(9)-C(3)-C(5)   | 109.31(9)  |
| C(12)-H(12) | 0.9500     | N(1)-C(4)-C(3)   | 107.39(9)  |

|                  |            |                   |            |
|------------------|------------|-------------------|------------|
| C(10)-C(4)-N(1)  | 125.93(10) | H(9A)-C(9)-H(9B)  | 108.1      |
| C(10)-C(4)-C(3)  | 126.67(10) | O(2)-C(10)-C(11)  | 106.41(9)  |
| C(3)-C(5)-H(5A)  | 109.3      | C(4)-C(10)-O(2)   | 117.61(10) |
| C(3)-C(5)-H(5B)  | 109.3      | C(4)-C(10)-C(11)  | 135.98(10) |
| H(5A)-C(5)-H(5B) | 107.9      | O(3)-C(11)-C(10)  | 126.02(10) |
| C(6)-C(5)-C(3)   | 111.75(9)  | O(3)-C(11)-C(12)  | 125.32(11) |
| C(6)-C(5)-H(5A)  | 109.3      | C(12)-C(11)-C(10) | 108.63(10) |
| C(6)-C(5)-H(5B)  | 109.3      | C(11)-C(12)-H(12) | 126.0      |
| C(5)-C(6)-H(6A)  | 109.2      | C(11)-C(12)-C(13) | 108.06(10) |
| C(5)-C(6)-H(6B)  | 109.2      | C(13)-C(12)-H(12) | 126.0      |
| H(6A)-C(6)-H(6B) | 107.9      | O(2)-C(13)-C(12)  | 108.77(10) |
| C(7)-C(6)-C(5)   | 112.04(10) | O(4)-C(13)-O(2)   | 118.94(11) |
| C(7)-C(6)-H(6A)  | 109.2      | O(4)-C(13)-C(12)  | 132.29(11) |
| C(7)-C(6)-H(6B)  | 109.2      | C(15)-C(14)-N(2)  | 116.69(10) |
| C(6)-C(7)-H(7A)  | 109.4      | C(19)-C(14)-N(2)  | 122.16(10) |
| C(6)-C(7)-H(7B)  | 109.4      | C(19)-C(14)-C(15) | 120.99(10) |
| H(7A)-C(7)-H(7B) | 108.0      | C(14)-C(15)-H(15) | 120.4      |
| C(8)-C(7)-C(6)   | 111.19(10) | C(16)-C(15)-C(14) | 119.26(12) |
| C(8)-C(7)-H(7A)  | 109.4      | C(16)-C(15)-H(15) | 120.4      |
| C(8)-C(7)-H(7B)  | 109.4      | C(15)-C(16)-H(16) | 119.9      |
| C(7)-C(8)-H(8A)  | 109.6      | C(17)-C(16)-C(15) | 120.26(11) |
| C(7)-C(8)-H(8B)  | 109.6      | C(17)-C(16)-H(16) | 119.9      |
| C(7)-C(8)-C(9)   | 110.48(9)  | C(16)-C(17)-H(17) | 120.0      |
| H(8A)-C(8)-H(8B) | 108.1      | C(16)-C(17)-C(18) | 120.04(11) |
| C(9)-C(8)-H(8A)  | 109.6      | C(18)-C(17)-H(17) | 120.0      |
| C(9)-C(8)-H(8B)  | 109.6      | C(17)-C(18)-H(18) | 119.8      |
| C(3)-C(9)-H(9A)  | 109.5      | C(17)-C(18)-C(19) | 120.30(12) |
| C(3)-C(9)-H(9B)  | 109.5      | C(19)-C(18)-H(18) | 119.8      |
| C(8)-C(9)-C(3)   | 110.82(9)  | C(14)-C(19)-C(18) | 119.12(11) |
| C(8)-C(9)-H(9A)  | 109.5      | C(14)-C(19)-H(19) | 120.4      |
| C(8)-C(9)-H(9B)  | 109.5      | C(18)-C(19)-H(19) | 120.4      |

---

Symmetry transformations used to generate equivalent atoms:



**Table S45.** Anisotropic displacement parameters ( $\text{\AA}^2 \times 10^3$ ) for **19**. The anisotropic displacement factor exponent takes the form:  $-2p^2[h^2 a^*2U^{11} + \dots + 2 h k a^* b^* U^{12}]$

|       | U <sup>11</sup> | U <sup>22</sup> | U <sup>33</sup> | U <sup>23</sup> | U <sup>13</sup> | U <sup>12</sup> |
|-------|-----------------|-----------------|-----------------|-----------------|-----------------|-----------------|
| O(1)  | 25(1)           | 27(1)           | 27(1)           | 0(1)            | 5(1)            | 7(1)            |
| O(2)  | 21(1)           | 20(1)           | 21(1)           | -2(1)           | 3(1)            | 2(1)            |
| O(3)  | 26(1)           | 24(1)           | 27(1)           | -7(1)           | 4(1)            | 4(1)            |
| O(4)  | 29(1)           | 23(1)           | 33(1)           | -2(1)           | 0(1)            | 6(1)            |
| N(1)  | 19(1)           | 20(1)           | 19(1)           | -2(1)           | 8(1)            | 1(1)            |
| N(2)  | 22(1)           | 18(1)           | 22(1)           | -2(1)           | 10(1)           | 1(1)            |
| C(1)  | 20(1)           | 24(1)           | 21(1)           | 1(1)            | 7(1)            | 0(1)            |
| C(2)  | 25(1)           | 27(1)           | 20(1)           | -2(1)           | 5(1)            | 5(1)            |
| C(3)  | 18(1)           | 20(1)           | 18(1)           | -1(1)           | 7(1)            | 0(1)            |
| C(4)  | 18(1)           | 18(1)           | 20(1)           | 0(1)            | 10(1)           | -1(1)           |
| C(5)  | 25(1)           | 25(1)           | 21(1)           | -2(1)           | 11(1)           | -6(1)           |
| C(6)  | 34(1)           | 27(1)           | 25(1)           | -4(1)           | 11(1)           | -11(1)          |
| C(7)  | 38(1)           | 22(1)           | 23(1)           | -4(1)           | 11(1)           | -2(1)           |
| C(8)  | 27(1)           | 23(1)           | 21(1)           | -1(1)           | 11(1)           | 1(1)            |
| C(9)  | 21(1)           | 23(1)           | 23(1)           | -2(1)           | 11(1)           | -2(1)           |
| C(10) | 19(1)           | 17(1)           | 21(1)           | 0(1)            | 8(1)            | 0(1)            |
| C(11) | 20(1)           | 21(1)           | 22(1)           | -2(1)           | 9(1)            | -2(1)           |
| C(12) | 21(1)           | 24(1)           | 22(1)           | -2(1)           | 4(1)            | -2(1)           |
| C(13) | 20(1)           | 24(1)           | 22(1)           | 1(1)            | 3(1)            | -1(1)           |
| C(14) | 19(1)           | 24(1)           | 18(1)           | 1(1)            | 6(1)            | 3(1)            |
| C(15) | 25(1)           | 24(1)           | 24(1)           | 0(1)            | 9(1)            | 3(1)            |
| C(16) | 28(1)           | 33(1)           | 25(1)           | -1(1)           | 11(1)           | 9(1)            |
| C(17) | 23(1)           | 40(1)           | 22(1)           | 3(1)            | 10(1)           | 5(1)            |
| C(18) | 22(1)           | 32(1)           | 22(1)           | 4(1)            | 6(1)            | -1(1)           |
| C(19) | 22(1)           | 24(1)           | 21(1)           | 0(1)            | 7(1)            | 2(1)            |

**Table S46.** Hydrogen coordinates ( $\times 10^4$ ) and isotropic displacement parameters ( $\text{\AA}^2 \times 10^3$ ) for **19**.

|       | x        | y        | z        | U(eq) |
|-------|----------|----------|----------|-------|
| H(3)  | 4330(20) | 5913(15) | 8131(19) | 62(6) |
| H(2)  | 2669(17) | 6567(12) | 6701(14) | 32(4) |
| H(2A) | 2456     | 4781     | 3839     | 29    |
| H(2B) | 1213     | 4183     | 4107     | 29    |
| H(5A) | 3317     | 2701     | 6223     | 27    |
| H(5B) | 1764     | 3180     | 5858     | 27    |
| H(6A) | 1765     | 1793     | 4760     | 33    |
| H(6B) | 1271     | 2686     | 3947     | 33    |
| H(7A) | 4060     | 1835     | 4555     | 32    |
| H(7B) | 2905     | 1844     | 3293     | 32    |
| H(8A) | 3189     | 3466     | 3147     | 27    |
| H(8B) | 4734     | 2979     | 3444     | 27    |
| H(9A) | 4893     | 4302     | 4647     | 25    |
| H(9B) | 5249     | 3377     | 5419     | 25    |
| H(12) | 7260     | 4541     | 9844     | 28    |
| H(15) | 1710     | 7240     | 8042     | 29    |
| H(16) | 19       | 7092     | 9022     | 33    |
| H(17) | -1015    | 5647     | 9135     | 33    |
| H(18) | -311     | 4331     | 8325     | 30    |
| H(19) | 1395     | 4466     | 7352     | 27    |

**Table S47.** Torsion angles [°] for **19**.

|                        |             |                         |             |
|------------------------|-------------|-------------------------|-------------|
| O(1)-C(1)-C(2)-C(3)    | -173.18(12) | C(4)-N(1)-C(1)-O(1)     | 179.28(10)  |
| O(2)-C(10)-C(11)-O(3)  | 177.17(10)  | C(4)-N(1)-C(1)-C(2)     | -1.88(13)   |
| O(2)-C(10)-C(11)-C(12) | -0.92(12)   | C(4)-C(3)-C(5)-C(6)     | 179.95(10)  |
| O(3)-C(11)-C(12)-C(13) | -177.90(11) | C(4)-C(3)-C(9)-C(8)     | -178.76(9)  |
| N(1)-N(2)-C(14)-C(15)  | -158.36(10) | C(4)-C(10)-C(11)-O(3)   | -2.9(2)     |
| N(1)-N(2)-C(14)-C(19)  | 26.13(15)   | C(4)-C(10)-C(11)-C(12)  | 179.05(13)  |
| N(1)-C(1)-C(2)-C(3)    | 8.09(12)    | C(5)-C(3)-C(4)-N(1)     | -108.69(10) |
| N(1)-C(4)-C(10)-O(2)   | 174.49(9)   | C(5)-C(3)-C(4)-C(10)    | 70.31(14)   |
| N(1)-C(4)-C(10)-C(11)  | -5.5(2)     | C(5)-C(3)-C(9)-C(8)     | 58.22(12)   |
| N(2)-N(1)-C(1)-O(1)    | 0.25(17)    | C(5)-C(6)-C(7)-C(8)     | -53.88(14)  |
| N(2)-N(1)-C(1)-C(2)    | 179.10(9)   | C(6)-C(7)-C(8)-C(9)     | 56.49(13)   |
| N(2)-N(1)-C(4)-C(3)    | 173.75(9)   | C(7)-C(8)-C(9)-C(3)     | -59.37(13)  |
| N(2)-N(1)-C(4)-C(10)   | -5.26(17)   | C(9)-C(3)-C(4)-N(1)     | 128.71(10)  |
| N(2)-C(14)-C(15)-C(16) | -177.02(10) | C(9)-C(3)-C(4)-C(10)    | -52.29(15)  |
| N(2)-C(14)-C(19)-C(18) | 177.04(10)  | C(9)-C(3)-C(5)-C(6)     | -55.24(12)  |
| C(1)-N(1)-N(2)-C(14)   | 77.66(13)   | C(10)-O(2)-C(13)-O(4)   | 179.35(10)  |
| C(1)-N(1)-C(4)-C(3)    | -5.22(12)   | C(10)-O(2)-C(13)-C(12)  | -1.18(12)   |
| C(1)-N(1)-C(4)-C(10)   | 175.77(10)  | C(10)-C(11)-C(12)-C(13) | 0.21(13)    |
| C(1)-C(2)-C(3)-C(4)    | -10.63(11)  | C(11)-C(12)-C(13)-O(2)  | 0.60(13)    |
| C(1)-C(2)-C(3)-C(5)    | 107.04(11)  | C(11)-C(12)-C(13)-O(4)  | 179.97(13)  |
| C(1)-C(2)-C(3)-C(9)    | -131.62(10) | C(13)-O(2)-C(10)-C(4)   | -178.71(10) |
| C(2)-C(3)-C(4)-N(1)    | 9.61(11)    | C(13)-O(2)-C(10)-C(11)  | 1.28(11)    |
| C(2)-C(3)-C(4)-C(10)   | -171.39(11) | C(14)-C(15)-C(16)-C(17) | -0.02(18)   |
| C(2)-C(3)-C(5)-C(6)    | 66.72(12)   | C(15)-C(14)-C(19)-C(18) | 1.72(17)    |
| C(2)-C(3)-C(9)-C(8)    | -64.08(12)  | C(15)-C(16)-C(17)-C(18) | 1.20(19)    |
| C(3)-C(4)-C(10)-O(2)   | -4.33(16)   | C(16)-C(17)-C(18)-C(19) | -0.92(18)   |
| C(3)-C(4)-C(10)-C(11)  | 175.69(11)  | C(17)-C(18)-C(19)-C(14) | -0.52(18)   |
| C(3)-C(5)-C(6)-C(7)    | 53.73(14)   | C(19)-C(14)-C(15)-C(16) | -1.46(18)   |
| C(4)-N(1)-N(2)-C(14)   | -101.26(12) |                         |             |

Symmetry transformations used to generate equivalent atoms:

**Table S48.** Hydrogen bonds for **19** [Å and °].

| D-H...A            | d(D-H)    | d(H...A)  | d(D...A)   | <(DHA)    |
|--------------------|-----------|-----------|------------|-----------|
| O(3)-H(3)...N(1)   | 0.95(2)   | 2.50(2)   | 3.2729(13) | 138.2(17) |
| O(3)-H(3)...N(2)   | 0.95(2)   | 1.68(2)   | 2.6136(13) | 169(2)    |
| N(2)-H(2)...O(4)#1 | 0.916(17) | 1.929(17) | 2.8335(13) | 168.9(15) |

Symmetry transformations used to generate equivalent atoms:

#1 -x+1,y+1/2,-z+3/2

## 9. References

1. C. V. Milyutin, R. D. Galimova, A. N. Komogortsev, B. V. Lichitskii, V. G. Melekhina, V. A. Migulin, A. N. Fakhrutdinov and M. E. Minyaev. Photoinduced assembly of the 3,4,4a,7a-tetrahydro-1H-cyclopenta[b]pyridione-2,7-dione core on the basis of allomaltol derivatives. *Org. Biomol. Chem.* 2021, **19**, 9975-9985
2. Bruker. APEX-III. *Bruker AXS Inc.*, Madison, Wisconsin, USA, 2019.
3. L. Krause, R. Herbst-Irmer, G. M. Sheldrick and D. Stalke, Comparison of silver and molybdenum microfocus X-ray sources for single-crystal structure determination. *J. Appl. Cryst.* 2015, **48**, 3–10.
4. G. M. Sheldrick, SHELXT - Integrated space-group and crystal-structure determination. *Acta Cryst.* 2015, **A71**, 3-8.
5. G. M. Sheldrick, Crystal structure refinement with SHELXL. *Acta Cryst.* 2015, **C71**, 3-8.
6. CrysAlisPro. Version 1.171.41.106a. *Rigaku Oxford Diffraction*, 2021.
7. O. V. Dolomanov, L.J. Bourhis, R.J. Gildea, J.A.K. Howard and H. Puschmann OLEX2: a complete structure solution, refinement and analysis program. *J. Appl. Cryst.* 2009, **42**, 2, 229-341.
8. C. F. Macrae, I. Sovago, S. J. Cottrell, P. T. A. Galek, P. McCabe, E. Pidcock, M. Platings, G. P. Shields, J. S. Stevens, M. Towler and P. A. Wood, Mercury 4.0: from visualization to analysis, design and prediction. *J. Appl. Cryst.* 2020, **53**, 226-235.
